# Supplementary material for: OCCAM: prediction of small ORFs in bacterial genomes by means of a target-decoy database approach and machine learning techniques
Source: Database (Oxford). 2020 Nov 18;2020:baaa067. doi: 10.1093/database/baaa067 (PMC7673341; doi:10.1093/database/baaa067)
Supplement: baaa067_Supp [file baaa067_supp.zip]

Archive with 7 entries (7 files):
- Supporting_File_S1.pdf
- Supporting_File_S2.pdf
- Supporting_File_S3.pdf
- Supporting_File_S4.pdf
- Supporting_File_S5.pdf
- Supporting_File_S6.pdf
- Supporting_File_S7.pdf
