# Supplementary material for: OCCAM: prediction of small ORFs in bacterial genomes by means of a target-decoy database approach and machine learning techniques
Source: Oxford University Press journal article supplement (doi:10.1093/database/baaa067), 2020-01-01
Supplement: baaa067_supp.zip [file baaa067_supp.zip]

**Accession numbers of studies and respective experiments in SRA, involving RNA-Seq data for the organisms for which OCCAM identified MGs.**

These data were used in our work to verify whether the found small ORFs are expressed by the given organism.

- *Actinobacillus pleuropneumoniae* serovar 5b L20 uid58789

No RNA-Seq experiment could be found.

- *Pseudomonas aeruginosa* PAO1

| Study     | Read size | Experiments                                                                                                  |
|-----------|-----------|--------------------------------------------------------------------------------------------------------------|
| SRP076720 | 51        | SRX1853532<br>SRX1853533<br>SRX1853292                                                                       |
| SRP057994 | 51        | SRX1017131<br>SRX1017132                                                                                     |
| SRP018866 | 50        | SRX245811<br>SRX245812<br>SRX245813                                                                          |
| ERP117503 | 51        | ERX3558798<br>ERX3558799<br>ERX3558800<br>ERX3558801<br>ERX3558802<br>ERX3558803<br>ERX3558804<br>ERX3558805 |

- *Escherichia coli* K12 substr MG

| Study     | Read size | Experiments                                                                                                  |
|-----------|-----------|--------------------------------------------------------------------------------------------------------------|
| ERP016032 | 51        | ERX1521038<br>ERX1521039<br>ERX1521040<br>ERX1521041<br>ERX1521042<br>ERX1521043<br>ERX1521044<br>ERX1521045 |

- *Mycobacterium tuberculosis* H37Rv uid57777

| Study     | Read size | Experiments                                                                |
|-----------|-----------|----------------------------------------------------------------------------|
| ERP002485 | 50        | ERX237496<br>ERX237497<br>ERX237500<br>ERX237501<br>ERX237502<br>ERX237503 |
