# Supplementary material for: OCCAM: prediction of small ORFs in bacterial genomes by means of a target-decoy database approach and machine learning techniques
Source: Oxford University Press journal article supplement (doi:10.1093/database/baaa067), 2020-01-01
Supplement: baaa067_supp.zip [file baaa067_supp.zip]

**Search hit details of all small ORFs found as Missing Genes by  
OCCAM in the eight tested bacteria  
(for only 4 bacteria there were missing genes reported)**

The head of each search hit indicates class (MG or GA in this case, if the GA subject is from a different family), query genome ID, query strand (positive or negative), query coordinates indicating the ORF start and end , subject (or hit) genome ID, subject strand, and subject coordinates.

It is additionally shown that the search hit was the best one found (rank=1, i.e., top-ranked), followed by scores generated by BLAST and OCCAM, including the probability generated by the ML algorithms. Also, the DNA sequence and its translation are shown. Those ORFs for which we could validate with RNA-Seq and ribosome profiling data (Table 6 in the manuscript) are marked with “\*\*\*” after the probability value.

- *Actinobacillus pleuropneumoniae* serovar 5b L20 uid58789

**vsORFs**

>MG1 QryID: NC\_009053\_(+)\_816047\_816130 HitID: NC\_013520\_(-)\_1407909\_1407995  
rank=1 bitscore=87.2 eval=8.0E-16 perc\_ident=96.15 perc\_cons=96.15 perc\_gaps=0.0  
query cvg=96.3 subj cvg=92.86 alpha=18.59 beta=1 prob=0.9997953483075565

[illegible]

MHVLC CAVLC CAVLC CAVLC CAVLC CCH

>MG2 QryID: NC\_009053 (-)\_2059896\_2059961 HitID: NC\_017154 (+)\_1236877\_1236942  
rank=1 bitscore=57.9 evalue=3.0E-7 perc\_ident=90.0 perc\_conserv=90.0 perc\_gaps=0.0  
query cvg=95.24 subj cvg=95.24 alpha=0.0 beta=6 prob=0.9977285883066762

TTGGTGGAGCTGGGGGGATTGAACCCCGTCCGAAATTACTCCATCTTCAGCACTACAC  
GTTTAG

MVELGGFEPPSEITPSSALHV

>MG3 QryID: NC\_009053 (-)\_1763309\_1763356 HitID: NC\_011184 (-)\_2858778\_2858825  
rank=1 bitscore=55.4 evalue=2.0E-6 perc\_ident=100.0 perc\_conserv=100.0 perc\_gaps=0.0  
query cvg=100.0 subj cvg=100.0 alpha=0.0 beta=1 prob=0.9953336386418956

TTGAAGAGTTTGATCATGGCTCAGATTGAACGCTGGCGGCAGGCTTAA

MKSLIMAOIERWROA

>MG4 QryID: NC\_009053\_(+)\_1346431\_1346472 HitID: NC\_008563\_(-)\_4833378\_4833419  
rank=1 bitscore=40.5 eval=0.055 perc\_ident=92.31 perc\_conserv=92.31 perc\_gaps=0.0  
query cvg=100.0 subj cvg=100.0 alpha=0.0 beta=1 prob=0.7243889481693003

GTGATACGGCTAGGAACAATCTTGCCGCTTTCAGAAATGTAG

MIRLGTLPLSEM

## No sORFs

- *Escherichia coli* K12 substr MG

#### vsORFs

>GA1 QryID: NC\_000913\_(-)\_365552\_365593 HitID: NC\_014976\_(-)\_2247517\_2247558  
rank=1 bitscore=46.0 eval=0.001 perc\_ident=100.0 perc\_cons=100.0 perc\_gaps=0.0  
query\_cvg=100.0 subj\_cvg=100.0 alpha=32.87 beta=5 prob=0.8859503934751499 \*\*\*

ATGCTTCCGGCTCGTATGTTGTGTGGAATTGTGAGCGGATAA

MLPARMLCGIVSG

#### No sORFs

- *Mycobacterium tuberculosis* H37Rv uid57777

#### vsORFs

>MG1 QryID: NC\_000962\_(+)\_3726000\_3726044 HitID: NC\_009142\_(-)\_6539108\_6539152  
rank=1 bitscore=47.3 eval=5.0E-4 perc\_ident=100.0 perc\_cons=100.0 perc\_gaps=0.0  
query\_cvg=100.0 subj\_cvg=100.0 alpha=49.35 beta=9 prob=0.9999404486345185

TTGCTGGCCGGCAACCCTCCAACCGCGGTGGGGTGCCCCGGGTGA

MLAGNPPTAVGCPG

#### No sORFs

- *Pseudomonas aeruginosa* PAO1

#### vsORFs

>GA1 QryID: NC\_002516\_(-)\_354512\_354589 HitID: NC\_008782\_(+)\_2232344\_2232421  
rank=1 bitscore=80.4 eval=9.0E-14 perc\_ident=100.0 perc\_cons=100.0 perc\_gaps=0.0  
query\_cvg=100.0 subj\_cvg=100.0 alpha=52.95 beta=1 prob=0.9999726375942918 \*\*\*

ATGCCCCGAACCCCTGGAAAGACCGCATGCAACCCAGTAGGTTGCGGATTGTCCAGGACG  
CGGGCCCGGCTAAGCTGA

MPATPGKTACNPVGSRLSRTRARLS

>MG1 QryID: NC\_002516\_(+)\_352323\_352376 HitID: NC\_008782\_(-)\_2234557\_2234610  
rank=1 bitscore=59.2 eval=1.0E-7 perc\_ident=100.0 perc\_cons=100.0 perc\_gaps=0.0  
query\_cvg=100.0 subj\_cvg=100.0 alpha=28.92 beta=1 prob=0.9994660315968504

TTGGGTCGAGGGCGGGTTTCCCCGGTGCTTCCCGGCTACTGTTACCGGGCGTGA

MGRGRVSPVLPGYCYRA

>GA2 QryID: NC\_002516\_(+)\_354476\_354520 HitID: NC\_008782\_(-)\_2232413\_2232457  
rank=1 bitscore=48.1 evalue=3.0E-4 perc\_ident=100.0 perc\_conserv=100.0 perc\_gaps=0.0  
query\_cvg=100.0 subj\_cvg=100.0 alpha=40.0 beta=4 prob=0.9397620101183046 \*\*\*

GTGGGAATGAACGTCGGTCGGGCCTATGCTGTTCGTTCACTTAG

MGMNVGRAYAVRSA

>GA3 QryID: NC\_002516\_(+)\_3099738\_3099779 HitID: NC\_010682\_(+)\_2079443\_2079484  
rank=1 bitscore=45.2 evalue=0.002 perc\_ident=100.0 perc\_conserv=100.0 perc\_gaps=0.0  
query\_cvg=100.0 subj\_cvg=100.0 alpha=53.54 beta=106 prob=0.9274782590102473 \*\*\*

TTGACCGCGCACAAAGTCGCTGACTTCGCCGATGGTGAAGTAG

MTAHKSLTSPMVK

>MG2 QryID: NC\_002516\_(-)\_352244\_352285 HitID: NC\_008782\_(+)\_2234648\_2234689  
rank=1 bitscore=43.5 evalue=0.007 perc\_ident=100.0 perc\_conserv=100.0 perc\_gaps=0.0  
query\_cvg=100.0 subj\_cvg=100.0 alpha=24.48 beta=1 prob=0.9261306000739523

ATGGCGGGGACCAGGGCTATTTCTTGCCGATCCTTAGGATAG

MAGTRAISCRSLG

### sORFs

>GA1 QryID: NC\_002516\_(+)\_354562\_354729 HitID: NC\_008782\_(-)\_2232204\_2232371  
rank=1 bitscore=84.0 evalue=2.0E-14 perc\_ident=98.18 perc\_conserv=98.18 perc\_gaps=0.0  
query\_cvg=100.0 subj\_cvg=100.0 alpha=98.18 beta=3 prob=0.998394002678091 \*\*\*

ATGCGGTCTTTCCAGGGGTTGCGGGCATTGACCCGGATTATGTGCGCGAGCGCCGCTCTA  
ACACGGGCTTCGCAAGTGAATCGCTGTGCCAGCGATGCCTTTCCCTGATTCGGAAGGCA  
CGAAGAGTGCCGGGGAAATTCCGTCCAGTGGTGTTCCTCCGGGTGCTAA

MRSFQGLRALTRIMCASAALTRASQWKSCLQRCLSLIRKARRVPGKFRPVVFPGC

>MG1 QryID: NC\_002516\_(+)\_352185\_352316 HitID: NC\_008782\_(-)\_2234617\_2234748  
rank=1 bitscore=62.8 evalue=3.0E-8 perc\_ident=97.67 perc\_conserv=97.67 perc\_gaps=0.0  
query\_cvg=100.0 subj\_cvg=100.0 alpha=97.67 beta=1 prob=0.9983719548589782 \*\*\*

TTGCGCGGGAAGCCAGTCTGCTCGGGGCGGCGGAGGTTCCCATGGGCCGCCCGCAGTTC  
TATCCTAAGGATCGGCAAGAAATAGCCCTGGTCCCCGCCATACGGGCGCTGGAGCGCTAC  
CGCGAGGCCTAA

MRGKPVCSGRRRFAMGRPQFYKDRQEIALVPAIRALERYREA

>MG2 QryID: NC\_002516\_(-)\_352249\_352380 HitID: NC\_008782\_(+)\_2234553\_2234684  
rank=1 bitscore=52.8 evalue=3.0E-5 perc\_ident=97.67 perc\_conserv=97.67 perc\_gaps=0.0  
query\_cvg=100.0 subj\_cvg=100.0 alpha=97.67 beta=1 prob=0.9982745293677642 \*\*\*

ATGGTCACGCCCCGGTAACAGTAGCCGGGAAGCACCGGGGAAACCCGCCCTCGACCCAACC  
GGAGTTAGGCCTCGCGGTAGCGCTCCAGCGCCCGTATGGCGGGGACCAGGGCTATTTCTT  
GCCGATCCTTAG

MVTPGNSSREAPGKPALDPTGVRPRGSAPAPVWRGPGLFLADP
