# Supplementary material for: OCCAM: prediction of small ORFs in bacterial genomes by means of a target-decoy database approach and machine learning techniques
Source: Oxford University Press journal article supplement (doi:10.1093/database/baaa067), 2020-01-01
Supplement: baaa067_supp.zip [file baaa067_supp.zip]

## Search hit details of all small ORFs found as Absent Annotation by OCCAM in the eight tested bacteria

The head of each search hit indicates class (AA in this case), query genome ID, query strand (positive or negative), query coordinates indicating the ORF start and end, subject (or hit) genome ID, subject strand, and subject coordinates.

Then, it is shown that the search hit was the best one found (rank=1, i.e., top-ranked), followed by scores generated by BLAST and OCCAM, including the probability generated by the ML algorithms. Below the head, it is shown the ORF DNA sequence.

### • *Actinobacillus pleuropneumoniae* serovar 5b L20 uid58789

#### vsORFs

>AA QryID: NC\_009053\_(+)\_364590\_364640 HitID: NC\_018690\_(-)\_1189409\_1189459  
rank=1 bitscore=54.9 evalue=2.0E-6 perc\_ident=100.0 perc\_conserv=100.0 perc\_gaps=0.0  
query\_cvg=100.0 subj\_cvg=100.0 alpha=34.38 beta=1 prob=0.990274623599495  
ATGGCGGAAGAACCGATTCTGTTGACGCAATACAGTCACGGTGCCGGTTGA

#### sORFs

>AA QryID: NC\_009053\_(-)\_1271425\_1271694 HitID: NC\_010278\_(-)\_1233454\_1233723  
rank=1 bitscore=149.0 evalue=4.0E-34 perc\_ident=100.0 perc\_conserv=100.0 perc\_gaps=0.0  
query\_cvg=100.0 subj\_cvg=100.0 alpha=78.67 beta=2 prob=0.9998978053064698  
ATGGCATATTACACTACAGATGTATCTAGTCATTTTCAGTATGATGAGCTTAATAATGAT  
AGAAAGGTACTACATACCATTCATTTTTTATAGATGATCGGCTATCTGACCATCAAAGA  
CATATCGATAAGTGGCAGAATCATATTATTAAACAGGAGTAAGTACCCTAAATTTATT  
AGTTCTATAAGAGTTAATATTTTCGTTTTATGACGTCATTATAGCTGATAATGTTAGTGA  
TTAACGCTTGAACGCCATGTTTTGATGTAA

>AA QryID: NC\_009053\_(+)\_606261\_606482 HitID: NC\_010278\_(+)\_569511\_569732  
rank=1 bitscore=127.0 evalue=2.0E-27 perc\_ident=100.0 perc\_conserv=100.0 perc\_gaps=0.0  
query\_cvg=100.0 subj\_cvg=100.0 alpha=83.14 beta=3 prob=0.9998456047621709  
ATGACAGATCTTCTTAAATTTGGTGATACCGAATTTCACTCCCGTCTTTTTACCGGTACG  
GGCAAATTTTCAAATCCTAAAGTGATGCAACAAAGTATTGTTACATCAGGTTCCCAGCTT  
GCAACAATGGCGATGAAACGGGTGGATTAGCACAGGAACAAGACGATATTTTAACGCCG  
TTAATTCAGAGTAAACTGTTACCGAATACTTCGGGGGCTAA

>AA QryID: NC\_009053\_(+)\_1953792\_1954010 HitID: NC\_010278\_(+)\_1915660\_1915878  
rank=1 bitscore=112.0 evalue=5.0E-23 perc\_ident=100.0 perc\_conserv=100.0 perc\_gaps=0.0  
query\_cvg=100.0 subj\_cvg=100.0 alpha=78.87 beta=2 prob=0.9998381437853132  
ATGGAGGAAAATGAGACTTTTTATATTACGTTTGATGAGCGTTTACTAGACTATTTGAAA  
AATAGCGATGCTCAAACACATTTTGTCAGTTTGTAGAAGTAGAGAATGAAGTTGATATT  
CCTACGGCATTGTCCATGAAATTAAGAAATCTGATCGCCATCAAATTTCTTCAAAGCCA  
TTTAAATTAATCTTATTCTGAAGAAGTAAATACATAG

>AA QryID: NC\_009053\_(+)\_1412416\_1412613 HitID: NC\_018690\_(-)\_138668\_138865  
rank=1 bitscore=105.0 evalue=6.0E-21 perc\_ident=100.0 perc\_conserv=100.0 perc\_gaps=0.0  
query\_cvg=100.0 subj\_cvg=100.0 alpha=67.0 beta=20 prob=0.9998381160497489  
ATGTCTGGTAAATCGTCAGATACATCACAAGCTGGTTCAAAAAAATGCTGGCGAAATAT  
GATAAATTTTGTGAAGAACTCGGTGTAAACCAAGGTGCTTGCCGTGGCTGCGTGCCGGTG  
GTGAAATTCGATCCGGAAAAAGAACCGAAATCAACAAAATCACAAGATAAAAACGCGACA  
GAACAGCACTCAAGCTAG

>AA QryID: NC\_009053\_(-)\_1103383\_1103547 HitID: NC\_010278\_(-)\_1069984\_1070148  
rank=1 bitscore=105.0 evalue=8.0E-21 perc\_ident=100.0 perc\_conserv=100.0 perc\_gaps=0.0  
query\_cvg=100.0 subj\_cvg=100.0 alpha=72.11 beta=1 prob=0.999836883418822  
ATGTATGGGATTCATAAGGATACAGGATTACCTTTAACAGACAATCTTGATAGGATTTGT  
ACTAAAATTTCTCTTGAAGGATTTGAAATTGGAGATAATGGCTTTCCAATAATTGTTGGA  
ATAGAAAATCAGAAAAATTGGATGAACGTTATGGATCTTGTTAA

>AA QryID: NC\_009053\_(-)\_1338846\_1339076 HitID: NC\_010278\_(-)\_1304295\_1304525  
rank=1 bitscore=117.0 evalue=2.0E-24 perc\_ident=94.74 perc\_conserv=96.05 perc\_gaps=0.0  
query\_cvg=100.0 subj\_cvg=100.0 alpha=63.85 beta=7 prob=0.999836156208983  
ATGTTTAATATATTTAAGAAACCTTTTAATAGAGAAAGCTTAGATTCTTGGTGTAAGATT

TTGGATGATATTAGTAAAATTGAGCTTTTAGCAATTCCTGTTGTTACTATATAGCCTGAAT  
GGTTTGTTTTATAAATTATTTAATAGCACTGTGCTTTTATTTTCAATGTATATATGTTTA  
TTTATGGCAGATTTTATACGTAAAAATAAGAGAATTTGATGGAGGAATAA  
>AA QryID: NC\_009053\_(-)\_2032829\_2033032 HitID: NC\_010278\_(-)\_1994432\_1994635  
rank=1 bitscore=102.0 eval=4.0E-20 perc\_ident=100.0 perc\_cons=100.0 perc\_gaps=0.0  
query\_cvg=100.0 subj\_cvg=100.0 alpha=100.0 beta=2 prob=0.9998355675176063  
ATGTCAATCTCATATAGGAAGGAAATTAAAGCCAATTCGTATTCGTTATTAGATCAAGTA  
TTTTTAAATGAGCGTTCAGAGAAACCGAATGAGAGCAGTTATTTTCCTTATAAACATCAT  
AATGTTAGAAGTACCTATACAGGTATAAACGTTATATGAGTTATGTTTTATGTATGGA  
GAAATACCCCGAATTAATATTGA  
>AA QryID: NC\_009053\_(-)\_179951\_180082 HitID: NC\_010278\_(-)\_1760677\_1760808  
rank=1 bitscore=85.5 eval=4.0E-15 perc\_ident=100.0 perc\_cons=100.0 perc\_gaps=0.0  
query\_cvg=100.0 subj\_cvg=100.0 alpha=70.23 beta=2 prob=0.9998350667460614  
ATGCGTAAACCCACATGGCTCGTGTGGGGACAACGTTTGTGCTTGTGTATTAGATTTG  
TCGATAATTAACCTTTGCCTCTGGCTTTGGTTGGTACTCTCTTCAAGCGTATTAGTT  
TATGATGCCTGA  
>AA QryID: NC\_009053\_(+)\_2166023\_2166220 HitID: NC\_010278\_(+)\_2133993\_2134190  
rank=1 bitscore=97.1 eval=2.0E-18 perc\_ident=98.46 perc\_cons=98.46 perc\_gaps=0.0  
query\_cvg=100.0 subj\_cvg=100.0 alpha=98.46 beta=9 prob=0.9998350500136746  
ATGAAAAAGGCATTTTTATTATTGCCGTTTATGGTAAGCCTGACCGCTTGCGGAGCAAGT  
GAGAACGCACCGAAAGACGATGCGGAATTGGCGCCGAGGATTATGCAACCCGTTTCCGGA  
TCAGGCGCATCGACAGGAAGCTACGGTTGGTCGTCAGACGTTGAGTCCGCACCGATGCCG  
GCTTCAATGACTAAATAA  
>AA QryID: NC\_009053\_(-)\_563208\_563474 HitID: NC\_018690\_(-)\_571159\_571380  
rank=1 bitscore=128.0 eval=1.0E-27 perc\_ident=86.3 perc\_cons=91.78 perc\_gaps=1.37  
query\_cvg=81.82 subj\_cvg=100.0 alpha=49.91 beta=2 prob=0.9998349843651906  
TTGGGGCTTTTTTTTAAACAAAATTTATCCCCCTCCCGAGGACAATACTATGAGTAACTTA  
TCAATCTCCCTCCTAGCTATCGGCACTGTAATGCTACTCGGAGGGCAAATCGCAACAACC  
AAAGATTTAGACGGTAAAGAATTAGTAGATTCAATTCATTGCCGACAGAAAGGCGGCACG  
ATGGAATGGGTACATAGTCACGCATTTGTAAAACCCCTCAAATGCCAATACCCACAAGCA  
ACGCCGATCGAATTTGTAAATAACTAA  
>AA QryID: NC\_009053\_(-)\_214422\_214559 HitID: NC\_010939\_(-)\_221710\_221847  
rank=1 bitscore=84.3 eval=2.0E-14 perc\_ident=100.0 perc\_cons=100.0 perc\_gaps=0.0  
query\_cvg=100.0 subj\_cvg=100.0 alpha=79.44 beta=1 prob=0.999834929111767  
ATGGTTTCTTGCAGATAATCATACCCAATTATTTTGGGCAATTTGTGGTATTTCTTATACT  
AAACATAATCGAAAAACATTTGCAAAATTTTCGTAAAACAGACCGCTTGCCGTTGCTA  
AAAACACGAAGCAATTGA  
>AA QryID: NC\_009053\_(+)\_2128804\_2128968 HitID: NC\_010278\_(+)\_2095483\_2095647  
rank=1 bitscore=83.6 eval=2.0E-14 perc\_ident=98.15 perc\_cons=98.15 perc\_gaps=0.0  
query\_cvg=100.0 subj\_cvg=100.0 alpha=98.15 beta=1 prob=0.9998346887589171  
ATGAGATTGTTTACACTTTCCGTCTTAGAACAACCTCTAAAGCCAATTTTGTAGATAAC  
TCTGTGGATAAGTTGTCAAATAGCTCGGTTTATAATGAGTATAACCGAGATAACCCCTTG  
TTTTTATTATAAGAGCGATGATCTTTATTTATGCGCAAAAATGA  
>AA QryID: NC\_009053\_(-)\_562929\_563198 HitID: NC\_018690\_(-)\_570879\_571148  
rank=1 bitscore=125.0 eval=6.0E-27 perc\_ident=75.0 perc\_cons=81.82 perc\_gaps=0.0  
query\_cvg=98.88 subj\_cvg=98.88 alpha=49.63 beta=1 prob=0.9998345816925083  
ATGGCTATTGATGACTGGAATTTATATCCGCAGAAACGACCGATTAAGAGTGGCAACTAT  
CTTGTAGTTGTTACCGTTAAAAATGGAGCGGCTGGCATTAGCCGCTTAGTCACACTAAGT  
AACTCTGATGCTATGCGCCACGAATTTGAATTTGACGCACGCATGAAAGAACGTGGAGGT  
ACTGAACACGTTTACGCATGGGTACATTACAAAGAACCACCTCCGCCACCGGGATTAACC  
GCACCGAAAGGAAGTAAAAATGAACGCTAA  
>AA QryID: NC\_009053\_(+)\_899138\_899350 HitID: NC\_010939\_(+)\_940057\_940269  
rank=1 bitscore=90.9 eval=2.0E-16 perc\_ident=81.43 perc\_cons=81.43 perc\_gaps=0.0  
query\_cvg=100.0 subj\_cvg=100.0 alpha=61.84 beta=11 prob=0.99983454383303  
ATGAGTATTATTGAATTTCTTAGCTATGGCTCAATCCTGATTCTCGCTTTTCCTTTGTC  
ATTAAAGATATGCCTAACCTTCGTATCTCTAATATTTGTTGGGGATTAGGTTTTATTTT  
TACAGTCTTAACTCAGCAATGTATATTGTTGCCGCTTTGAATTTATTGATTGTCGTTTTA  
AACGGCTATTTTCTGATTAAAGAACGCCCGTAA  
>AA QryID: NC\_009053\_(+)\_546415\_546708 HitID: NC\_010278\_(+)\_553348\_553641  
rank=1 bitscore=103.0 eval=3.0E-20 perc\_ident=53.61 perc\_cons=70.1 perc\_gaps=0.0  
query\_cvg=100.0 subj\_cvg=100.0 alpha=25.77 beta=19 prob=0.9998344001435253  
ATGCAGCATAAAATTATCTATTCAAGTAACGCTCAAAAAGATATCGAAGATATTTTGTG

AATATTACTGAATTCACAAGTGTGTTTTAGTGCTATCAATGTATTAATGATGTAAAAGCT  
 TCGATTGAGTTACTCGGGTTTATGCCTCAAATGGGTGTGCGAAGGGTATATAAAAGGTACA  
 AGGGAGATTTATTCGAGAAAATACAGAGTTGTATATGAAATAGATGATGAGAAGTCAGAA  
 ATTATCATCCTTACCATTTTACATACTCGCCGGTTATATCCGCCGCTTGCTTAG  
 >AA QryID: NC\_009053\_(+)\_776317\_776511 HitID: NC\_010278\_(+)\_739288\_739482  
 rank=1 bitscore=83.2 eval=4.0E-14 perc\_ident=76.56 perc\_cons=78.12 perc\_gaps=0.0  
 query\_cvg=100.0 subj\_cvg=100.0 alpha=76.56 beta=16 prob=0.9998338699251865  
 TTGATAATAAGCGGTCAAAAACGGCCGCTTTTTTACACTATTCGAGGCAATATGAAAAA  
 GTAATTTTATTAATAGCAAGCATTTTAGCAATAAGTGCTTGTCTCAATCTAAAAACGTT  
 TATTTTAACGGTGCTGAAGGCTCAAACCTCAGGTATCAAATACGAATCAACCAGCAAAGAG  
 TTTTCATTAAGTAG  
 >AA QryID: NC\_009053\_(-)\_925491\_925610 HitID: NC\_010278\_(-)\_887895\_888014  
 rank=1 bitscore=58.2 eval=6.0E-7 perc\_ident=100.0 perc\_cons=100.0 perc\_gaps=0.0  
 query\_cvg=100.0 subj\_cvg=100.0 alpha=72.96 beta=1 prob=0.999832368254628  
 ATGTCTATTGTTGCAATTTAGGAAATAAGTTTGAATACAGAAAGCTAAATTATTGAAA  
 GGTAGTTTATGTCAGTCGTAGAGACAAAAAATTTTATTTCATTATGCTTATCAAAAGGCTAA  
 >AA QryID: NC\_009053\_(+)\_609851\_609985 HitID: NC\_010939\_(+)\_641303\_641437  
 rank=1 bitscore=57.4 eval=2.0E-6 perc\_ident=100.0 perc\_cons=100.0 perc\_gaps=0.0  
 query\_cvg=100.0 subj\_cvg=100.0 alpha=100.0 beta=3 prob=0.9998302896005287  
 ATGGAAAAGATAGCACAGGCTTTAACTGTCGCCGGTTCGGATAGCGGTGGCGGAGCGGGG  
 ATTCAGGCGGATTTCAAAACCTTCCAAATGCGAGGCGTTTCGGCACATCGGTACTGACC  
 GCAATTACCGCGTAA  
 >AA QryID: NC\_009053\_(-)\_1740497\_1740613 HitID: NC\_010939\_(-)\_1764699\_1764815  
 rank=1 bitscore=57.4 eval=1.0E-6 perc\_ident=100.0 perc\_cons=100.0 perc\_gaps=0.0  
 query\_cvg=100.0 subj\_cvg=100.0 alpha=59.72 beta=5 prob=0.9998293681780213  
 ATGATGAAAAAATTATTTTATGCGGCGTTAATCGCATCGTTTCGGGTTGGCTGCCTGCGGT  
 GTAAAAGGCCCGCTTTATTTTCCCGAGCAACAACCGGCTCAACAACAAACAAAATAA  
 >AA QryID: NC\_009053\_(-)\_1351681\_1351773 HitID: NC\_010278\_(-)\_1317141\_1317233  
 rank=1 bitscore=53.5 eval=2.0E-5 perc\_ident=100.0 perc\_cons=100.0 perc\_gaps=0.0  
 query\_cvg=100.0 subj\_cvg=100.0 alpha=71.49 beta=1 prob=0.9998281140072074  
 GTGACACCGATTTACGGATATTGTGCAAAACAAGCGGTCAATTTTCTTCAAAAATTTACC  
 AGCCGTACTATTTTGTGTTGTCCGTGGTTTTAG  
 >AA QryID: NC\_009053\_(-)\_2054459\_2054647 HitID: NC\_010278\_(-)\_2016142\_2016330  
 rank=1 bitscore=93.6 eval=3.0E-17 perc\_ident=100.0 perc\_cons=100.0 perc\_gaps=0.0  
 query\_cvg=100.0 subj\_cvg=100.0 alpha=77.94 beta=55 prob=0.9998234451669142  
 ATGAATTGTGAGCATGCCTCAGAATTAATTTCACTTAGCTGCGAACAAAACTGAAAGTT  
 AAAGAAAGTGTCCGGCTTCAAGTGCATTTATGGCTTTGCCCTAAATGCCGTCATTTTAA  
 CAAAATAATGATAATTGCGCCAAATGCTGCACGAATACTGCCAACAAGATAAACTAAT  
 TTGAAGTAA  
 >AA QryID: NC\_009053\_(+)\_584635\_584871 HitID: NC\_010939\_(+)\_548285\_548521  
 rank=1 bitscore=63.9 eval=3.0E-8 perc\_ident=53.85 perc\_cons=53.85 perc\_gaps=0.0  
 query\_cvg=100.0 subj\_cvg=100.0 alpha=53.85 beta=1 prob=0.9998191202645645  
 ATGCGTGATTTTATCCAGTTTGGGCAAAATCTTTTTTATAATGCTTATTGCATTAGGT  
 GCATTTTCTGTTCTTTGCTATTGATTTGTCTATATTTTCGCATTTTTTAGCGTGT  
 GCTATTGTGTTTTTGTCCGTTTAGTAACGGTCATTAGTCAAACCTCACAACATTATGAT  
 GATTTAGCAAAGGCGGAAAAAGAAAAAGCCCGTGTCAAATACGTCATTATTCAGTAA  
 >AA QryID: NC\_009053\_(+)\_2052542\_2052637 HitID: NC\_010278\_(+)\_2014225\_2014320  
 rank=1 bitscore=49.7 eval=2.0E-4 perc\_ident=100.0 perc\_cons=100.0 perc\_gaps=0.0  
 query\_cvg=100.0 subj\_cvg=100.0 alpha=100.0 beta=1 prob=0.9998173395719308  
 TTGAATATGATTTTCTATATTAAGCGGTGCGATTTAAGAAATTTTTGCAAATTGCAAAA  
 TTCTGTGAAAATTCGACCGCTTTTGTTTTAAATAG  
 >AA QryID: NC\_009053\_(+)\_402286\_402411 HitID: NC\_010278\_(+)\_407116\_407241  
 rank=1 bitscore=44.7 eval=0.007 perc\_ident=97.56 perc\_cons=97.56 perc\_gaps=0.0  
 query\_cvg=100.0 subj\_cvg=100.0 alpha=97.56 beta=1 prob=0.9997708285333903  
 GTGTTTATACAGGTGATTTTACTGATTAAAAAACAGTGTCAATCCTGTTTCTACTATTT  
 TTTGTAATAATCCAGTATGTTAATCCGTTTTGGGAGGCGTATTTAGCAAGCGGTGGA  
 ATTTGA  
 >AA QryID: NC\_009053\_(+)\_1508281\_1508466 HitID: NC\_010278\_(+)\_1457267\_1457437  
 rank=1 bitscore=50.8 eval=2.0E-4 perc\_ident=76.79 perc\_cons=76.79 perc\_gaps=0.0  
 query\_cvg=91.8 subj\_cvg=100.0 alpha=73.64 beta=2 prob=0.9997413265060235  
 TTGCTTGAGGAACTATGCTCGAAATTTATCTGCTTGCCATCCCGTTTTATTTTCTGATC  
 GTCTTCTTTTACAATCTTTCGTCTTGTTTGCTTAAAGCCGTATTGCTTAGCTTATTG

ATTGCCGTCACCTTGGCCCGTTTCATTCGTCGTTCTTGGGTTTAACCGACTTTTTTCGTTCT  
CGTTAA

>AA QryID: NC\_009053\_(+)\_332091\_332189 HitID: NC\_018690\_(-)\_1228563\_1228661  
rank=1 bitscore=42.4 evalue=0.034 perc\_ident=100.0 perc\_conserv=100.0 perc\_gaps=0.0  
query\_cvg=100.0 subj\_cvg=100.0 alpha=76.02 beta=9 prob=0.9994240247928476  
ATGTTTTATGTAACCTTGGGTATTAGGCGTTTTACTTGCGATTCTTTTTGCCACGGTAATT  
ACTGTTAGCATTGAGAAAACAGGCAAATTTGACGAATAA

>AA QryID: NC\_009053\_(+)\_1946290\_1946391 HitID: NC\_010278\_(+)\_1908160\_1908261  
rank=1 bitscore=36.2 evalue=3.0 perc\_ident=96.88 perc\_conserv=100.0 perc\_gaps=0.0  
query\_cvg=96.97 subj\_cvg=96.97 alpha=93.94 beta=1 prob=0.9992101481508742  
ATGGAACAAAAATAAAGCCGATTTTATTCAAATCGGCTTTAAGTGAGAGTATGTCTAGT  
TGCATTAATAATGCAGGTTTTGCAAATTTTTATGAAAACCTAA

>AA QryID: NC\_009053\_(+)\_546222\_546425 HitID: NC\_010278\_(+)\_553161\_553358  
rank=1 bitscore=48.9 evalue=9.0E-4 perc\_ident=57.41 perc\_conserv=75.93 perc\_gaps=0.0  
query\_cvg=80.6 subj\_cvg=83.08 alpha=32.13 beta=5 prob=0.997855668053922  
TTGTTTTTTGATAAGCTGTTTATCCTTTATAATGAAATTAAGGAGAAAATAATGACAGAA  
GAATATCGTGAGTTTCTTGAGAAAAAAGTATCAGAAGCAAGAAAAAAGTATTGAGCGTGGC  
GATGTTTATTCCCATGAAGAAGTATGGGAACGAGCAATGAGGGCGATAGTGTTAGCTGAG  
AAAAATACACAAGATGCAGCATAA

>AA QryID: NC\_009053\_(+)\_1789810\_1789986 HitID: NC\_010278\_(+)\_1750548\_1750724  
rank=1 bitscore=37.7 evalue=1.9 perc\_ident=53.45 perc\_conserv=53.45 perc\_gaps=0.0  
query\_cvg=100.0 subj\_cvg=100.0 alpha=53.45 beta=1 prob=0.9821054163789433  
ATGAAAGAGTTTATTATTTGATTTCTATAATTATAATTCCAGTCATTATTGTTAAGTTA  
TTAGATTTATCCATATTTATAAGAATATCTAAAAATAAAAAACAAAACGAACATATATCAA  
ATAATATGTTACATAACTATTATATTAATGATAACCATATACAAAAATAAATTTTAA

>AA QryID: NC\_009053\_(-)\_396904\_397065 HitID: NC\_010278\_(-)\_401734\_401895  
rank=1 bitscore=37.0 evalue=3.2 perc\_ident=49.06 perc\_conserv=49.06 perc\_gaps=0.0  
query\_cvg=100.0 subj\_cvg=100.0 alpha=49.06 beta=2 prob=0.9534079457430178  
ATGTTGAATATGCCGAAACAAAAATGGATTAAATTATAATCATCTTAATTTATTTGTTC  
AGCCCGATTGATATTCTGCCCGAGGCGGTATTAGGTTTCGCTCGGTTTGTTGATGATGCG  
GCGGCAATTTTGCTGTTAATTCAAACCGTGTTGAAAAAATAA

### • *Bacillus subtilis* 168

#### vsORFs

>AA QryID: NC\_000964\_(-)\_972856\_972945 HitID: NC\_014976\_(-)\_3183730\_3183819  
rank=1 bitscore=95.2 evalue=3.0E-18 perc\_ident=96.55 perc\_conserv=100.0 perc\_gaps=0.0  
query\_cvg=100.0 subj\_cvg=100.0 alpha=49.42 beta=20 prob=0.9987508243423942  
GTGAAAACAATCATCATGATGGGTGTCATTGTCACTTTTTTAGTATCAATTTTACCGCA  
GGATACGAAAGCAAGCCTGGAAAAGAATAA

>AA QryID: NC\_000964\_(+)\_820729\_820800 HitID: NC\_019896\_(-)\_3244074\_3244145  
rank=1 bitscore=82.1 evalue=3.0E-14 perc\_ident=100.0 perc\_conserv=100.0 perc\_gaps=0.0  
query\_cvg=100.0 subj\_cvg=100.0 alpha=36.8 beta=1 prob=0.9987474050202934  
ATGAGAAAATTAAGAAAAAACTGGAGAAAATCGATTGTTAGCCCGGTTCTTTATACTAAT  
GAAAAATGGTAA

>AA QryID: NC\_000964\_(+)\_2299311\_2299385 HitID: NC\_009848\_(+)\_1972301\_1972375  
rank=1 bitscore=47.7 evalue=6.0E-4 perc\_ident=62.5 perc\_conserv=70.83 perc\_gaps=0.0  
query\_cvg=100.0 subj\_cvg=100.0 alpha=17.36 beta=1 prob=0.8711051052480673  
ATGATTGACGCTCTGTTGCCACAGTTTCACTCTTAACATTATTATACTTTGTCGTCATG  
GAGGTCACCGATTAA

>AA QryID: NC\_000964\_(-)\_1525119\_1525190 HitID: NC\_006510\_(-)\_1080943\_1081014  
rank=1 bitscore=44.8 evalue=0.005 perc\_ident=65.22 perc\_conserv=69.57 perc\_gaps=0.0  
query\_cvg=100.0 subj\_cvg=100.0 alpha=-4.35 beta=2 prob=0.8092166630568011  
ATGCTGCGTAAATTAAGAAAGAACTCAGAAGACAATGGAACGGAATGCTCCGTAAGAAA  
GCAATTGCCTGA

#### sORFs

>AA QryID: NC\_000964\_(+)\_1192627\_1192797 HitID: NC\_017743\_(+)\_1240526\_1240696

rank=1 bitscore=81.3 evalue=1.0E-13 perc\_ident=78.57 perc\_conserv=78.57 perc\_gaps=0.0  
 query\_cvg=100.0 subj\_cvg=100.0 alpha=51.78 beta=40 prob=0.998620995816329  
 ATGATGTACCTGCTGGCAGTTTTATGCCCGCCGCTTGCTGTTTTGTTTTCGGGAAAACCG  
 TTTCAGGCCTTGCTGAATCTCATATTGACCTGTATCTTTGGCTGCCGGGCGCGATTAC  
 GCCTGCTTTATCGTCGCCGACCGCCGTGCCGAAAAACGGGCAAGAAGATAA  
 >AA QryID: NC\_000964\_(-)\_3119273\_3119431 HitID: NC\_018520\_(-)\_3050712\_3050870  
 rank=1 bitscore=93.6 evalue=2.0E-17 perc\_ident=100.0 perc\_conserv=100.0 perc\_gaps=0.0  
 query\_cvg=100.0 subj\_cvg=100.0 alpha=77.88 beta=16 prob=0.9986209406520539  
 TTGACATTAAGGGAGGCAGTTATGAAACATAAAAAACGAAACAAACGTAACGTGCCAATG  
 CTGATTGCGGCATCTGTGATCGCTTGTCTTTTTTCTTGTCTTGTGATGATCGGTTTT  
 GAATGGCAAAAAAGTATAATTGATCATTTTTATCTATAA  
 >AA QryID: NC\_000964\_(-)\_1454832\_1454957 HitID: NC\_014479\_(-)\_1410677\_1410802  
 rank=1 bitscore=75.1 evalue=5.0E-12 perc\_ident=100.0 perc\_conserv=100.0 perc\_gaps=0.0  
 query\_cvg=100.0 subj\_cvg=100.0 alpha=78.19 beta=14 prob=0.9986209406334523  
 ATGGGTTTTCTTCATTTTAATTGGGTTATGTCTCACTGTTCTCGGTGGCAGCTGTCTTGCT  
 GTAAACCTCTCAACCAAAAACATGAAATTAAACCCTTTCGAACATTTGATGATTTTTTT  
 ATTTAA  
 >AA QryID: NC\_000964\_(-)\_2840803\_2840925 HitID: NC\_018520\_(-)\_2772242\_2772364  
 rank=1 bitscore=72.0 evalue=4.0E-11 perc\_ident=100.0 perc\_conserv=100.0 perc\_gaps=0.0  
 query\_cvg=100.0 subj\_cvg=100.0 alpha=100.0 beta=16 prob=0.9986209406319673  
 ATGGAAAAAACGTATTGTCAATCCGGCGAGAAGGACCCAGAAGCGGTCTACTTAACTGTG  
 AGAGGCTATCGAATTAAGCTGTGCGCTGAACAAATGAACTGATTTCTGCCGTCAGAAAG  
 TAA  
 >AA QryID: NC\_000964\_(+)\_2516215\_2516367 HitID: NC\_014976\_(+)\_495354\_495506  
 rank=1 bitscore=82.8 evalue=4.0E-14 perc\_ident=98.0 perc\_conserv=98.0 perc\_gaps=0.0  
 query\_cvg=100.0 subj\_cvg=100.0 alpha=98.0 beta=10 prob=0.9986209406212655  
 TTGAAAGAAGTTAAAGCCATGAAAAAATTCGTTCTGCTGCTGGCGGCAGCTGTCATCACA  
 TGCTCCATCGGCCACCAATCAGTGCGGCTACAAAGGCCCGAAAAAGAGCGGCCAAAA  
 CATCACTCTGCACTCAAGATATTCAGTCGGTAA  
 >AA QryID: NC\_000964\_(-)\_1903181\_1903468 HitID: NC\_019896\_(+)\_2166164\_2166451  
 rank=1 bitscore=154.0 evalue=1.0E-35 perc\_ident=97.89 perc\_conserv=100.0 perc\_gaps=0.0  
 query\_cvg=100.0 subj\_cvg=100.0 alpha=97.89 beta=4 prob=0.9986209406134114  
 TTGGAGCATACTGGTCATAGTTCGTTTCTTCAGCTCTTTGTTTAAACCTAACTTTAATA  
 AGGGTGGAAATTGGTATGAAATATGAAAAACAAGTCTTTTTGGAATGATTTTAGTTATT  
 GTAGCACTTCTAATATCTATATATTTTATGTGTAATACAAATGCGTTGATACCTGCTGGA  
 TATGATCTAGCTATTCATGGAATTGTAATATCTAGAACTGTAATGATTGCTTTTACTTTG  
 TATTTAGTTTCAAAGTTAGGATATTTTCTTCTGAATAAAAAAGATTAA  
 >AA QryID: NC\_000964\_(-)\_3035518\_3035700 HitID: NC\_020244\_(-)\_2847302\_2847484  
 rank=1 bitscore=108.0 evalue=6.0E-22 perc\_ident=100.0 perc\_conserv=100.0 perc\_gaps=0.0  
 query\_cvg=100.0 subj\_cvg=100.0 alpha=72.32 beta=9 prob=0.9986209406099973  
 GTGGAAAATAAAAACCGTCTGCTCTATTTCGACCATGCACATTTTGTTCATGTATCCTC  
 GCTCCAGCAGCAGAGAGTTACACGATACACCTTATTGATAAGGAACAAAATGAAAACATA  
 GAAGCTGAACAAAAAGGCTGCAATATTTACACAAAGGTCATTATATAATTTATTTGTTT  
 TGA  
 >AA QryID: NC\_000964\_(-)\_2637179\_2637328 HitID: NC\_017196\_(-)\_2440163\_2440312  
 rank=1 bitscore=84.0 evalue=2.0E-14 perc\_ident=100.0 perc\_conserv=100.0 perc\_gaps=0.0  
 query\_cvg=100.0 subj\_cvg=100.0 alpha=100.0 beta=5 prob=0.9986209405923908  
 TTGAAAAATCTAGAAGCTAAGGTAACGTTTTCTGTTCTGGTGATTATCGCCTTTTTACAA  
 GCTGTCCCGGGGGCTTGCGAACAGGCGTTTAATATAAATGGGGAAGCAGCAGTCAGGCTT  
 CCTCTTACTATTTTGCAAACTCAATTTAG  
 >AA QryID: NC\_000964\_(-)\_3054550\_3054699 HitID: NC\_017743\_(-)\_2918905\_2919054  
 rank=1 bitscore=84.7 evalue=1.0E-14 perc\_ident=100.0 perc\_conserv=100.0 perc\_gaps=0.0  
 query\_cvg=100.0 subj\_cvg=100.0 alpha=100.0 beta=4 prob=0.9986209405725643  
 ATGTACACGATGTTAAACGAAACGAGCTTGATAATGCAAATAAAATATGATAATGATAAT  
 GGGAAAGCCAATCTTACATATTCATTCGTTGCATATAAGTGGTTTTGCCTCAAGCAGTTT  
 GGTATGATCCAAATGGACGAGTATCGATAA  
 >AA QryID: NC\_000964\_(-)\_2779302\_2779436 HitID: NC\_020244\_(-)\_2590780\_2590914  
 rank=1 bitscore=70.5 evalue=2.0E-10 perc\_ident=100.0 perc\_conserv=100.0 perc\_gaps=0.0  
 query\_cvg=100.0 subj\_cvg=100.0 alpha=100.0 beta=5 prob=0.9986209405536411  
 TTGCACAATTTCCGTCCATTTTTAGAAAAAGATGTTTACAAAATGGAATTTGGTGGATAT  
 ACTTACAAAGTAAGAAAAAAGCAAAGGAGGCTGAACCAAAATGACAATGAGACAACGACG  
 TCAACCTGTACGTGA

>AA QryID: NC\_000964\_(-)\_3856782\_3856937 HitID: NC\_017196\_(-)\_3721549\_3721704  
 rank=1 bitscore=95.9 eval=5.0E-18 perc\_ident=98.04 perc\_cons=100.0 perc\_gaps=0.0  
 query\_cvg=100.0 subj\_cvg=100.0 alpha=98.04 beta=5 prob=0.9986209405499208  
 ATGCTTTTACGGTTTCCAGAGAGGGAAGGACAGCTGAGATCTTCCTAACGCAGGGAAAG  
 CAGCTTACCGCCTTTGAGCCGTATCAGGGAAAACAAGTATCTGATACCGTCATGCTGCGT  
 TACAGCATCTTTAAGCCGATCATCATGTGTAATTGA  
 >AA QryID: NC\_000964\_(+)\_1901781\_1901945 HitID: NC\_017196\_(+)\_1905041\_1905205  
 rank=1 bitscore=99.4 eval=4.0E-19 perc\_ident=100.0 perc\_cons=100.0 perc\_gaps=0.0  
 query\_cvg=100.0 subj\_cvg=100.0 alpha=100.0 beta=2 prob=0.9986209405481448  
 ATGAAATTAGAGAGAATTTATTTTAAAGAAAGCCCAATTGCACATGGACAAATGACAATT  
 GATATTGAGGTAAAATAACAATGCATTAAATCAGAAAAAGCTATTGGAGGATTTAATGTGT  
 TTAGACAATTTCCAATTTGGTATACACAAACACCTGACTATTTGA  
 >AA QryID: NC\_000964\_(-)\_1453322\_1453534 HitID: NC\_020244\_(-)\_1455218\_1455430  
 rank=1 bitscore=117.0 eval=2.0E-24 perc\_ident=98.57 perc\_cons=98.57 perc\_gaps=0.0  
 query\_cvg=100.0 subj\_cvg=100.0 alpha=71.46 beta=7 prob=0.9986209405381934  
 TTGTTCCGTTTGCTGATGAATTTTTTCAGACGAAAAGCAGTTATGCTCTTAACGGTTTTG  
 GGAATTTCCGCTCCTTTTATCGGGATGAAGATGGTGGGCTTTTATTATTACAGCTCTATC  
 ATAGGCTGTGCAGCGGGTTTCCTTTGCTGCACCCTCGCTCTCATCCTAGTTATGAAAAGA  
 TCTGATAAAGACAAAAATGAAGGGAAAGCTTGA  
 >AA QryID: NC\_000964\_(-)\_1056408\_1056659 HitID: NC\_019896\_(+)\_3018765\_3019016  
 rank=1 bitscore=155.0 eval=1.0E-35 perc\_ident=100.0 perc\_cons=100.0 perc\_gaps=0.0  
 query\_cvg=100.0 subj\_cvg=100.0 alpha=74.06 beta=2 prob=0.9986209405360805  
 ATGACCTGTCTCTGTGTTTAGAACACCTTTTCTTAAAGCAAAAAAGCCTGGCTCAGC  
 AGACTTTATGTATGGCTTGTGATAGGATACGATCGAAGCAGCCATTCTCCCTAATATCG  
 TTATTTGATTTACGAAAAATCATGTATCAGGAACCCCTTGTGTTGACCAATGATGCGCTC  
 CGAACACTTACTCTCTGTTGCTTATCCCCTCTATATAACGGCATGATATGCGACCGTATC  
 CATTTGAAATAG  
 >AA QryID: NC\_000964\_(+)\_1447012\_1447143 HitID: NC\_017195\_(+)\_1424772\_1424903  
 rank=1 bitscore=89.7 eval=2.0E-16 perc\_ident=100.0 perc\_cons=100.0 perc\_gaps=0.0  
 query\_cvg=100.0 subj\_cvg=100.0 alpha=100.0 beta=2 prob=0.9986209405232813  
 ATGAGGGGGTTTTTACATAAAAAAGACGAGCGAATCCGGGGGAATTCCACTCGCCGCTT  
 TCTAATGAAAAGACGGGATGCTGGATGGCAGCTCGTCTGTTTTATTATAATTTAACGAAC  
 GTATGTTTGTA  
 >AA QryID: NC\_000964\_(-)\_2706809\_2707108 HitID: NC\_019896\_(+)\_1519444\_1519743  
 rank=1 bitscore=163.0 eval=3.0E-38 perc\_ident=98.99 perc\_cons=100.0 perc\_gaps=0.0  
 query\_cvg=100.0 subj\_cvg=100.0 alpha=80.61 beta=1 prob=0.9986209405173104  
 TTGCTAAAATATAGAGTTTCAGTCGTTTCAGTAAACATTTCGAGCTGCTCTGCGAGGCCTTT  
 TCACAAAAAAGTGATTCCATCGCTCTTTCTTCCGCGGTAAATTTGGCGTTAAAATACTTC  
 AAAAGCTTTCTCCTGTCTTTTTGTATGATTCTTTTCTTTGTTTCATTGGAAAACAAGCT  
 GCATGTAACCCTAATTTACTATTGTTCACTACCGTATTAAGTGTGATGCGGGATTTGT  
 CATCTTCTCGAATTTTCTGCGAAAAGTTACAAAAATAGTCGAATGAGGCGCCTTTGA  
 >AA QryID: NC\_000964\_(-)\_1094734\_1094925 HitID: NC\_017196\_(-)\_1093057\_1093248  
 rank=1 bitscore=73.6 eval=3.0E-11 perc\_ident=100.0 perc\_cons=100.0 perc\_gaps=0.0  
 query\_cvg=100.0 subj\_cvg=100.0 alpha=100.0 beta=3 prob=0.9986209405070068  
 ATGAACAGAAATGTCGTTGTCACGATTGGTTTCGATGATTTTTGTTCTTTGACGAGTGGT  
 TCGATAAAGATTTCCACGACCATTGCAAGAAAAAGAAAGAATGCCATGACCCTTGCGAGA  
 AGAAGAAAAAGAAACACCATTGTTTCTCTTGTAACAAAAACACAGACATTCTTGCTGTCATT  
 GCTAAAGACTGA  
 >AA QryID: NC\_000964\_(-)\_3951824\_3951958 HitID: NC\_020244\_(-)\_3793182\_3793316  
 rank=1 bitscore=72.8 eval=4.0E-11 perc\_ident=100.0 perc\_cons=100.0 perc\_gaps=0.0  
 query\_cvg=100.0 subj\_cvg=100.0 alpha=100.0 beta=3 prob=0.9986209405029496  
 ATGGAATGTTTCGAGCTGATTCATAATAAAGGAAAAGATACCTGGAGTCAAAAGATCTTT  
 TTAACTTTTAAAAAGTGAATGTACTTAAAAAAATTTTCTGTACCTGTTTCGTTCAAGTG  
 AAAGCAGAAACCTAA  
 >AA QryID: NC\_000964\_(-)\_3804714\_3804875 HitID: NC\_017196\_(-)\_3669468\_3669629  
 rank=1 bitscore=82.4 eval=5.0E-14 perc\_ident=100.0 perc\_cons=100.0 perc\_gaps=0.0  
 query\_cvg=100.0 subj\_cvg=100.0 alpha=76.93 beta=6 prob=0.998620940502674  
 ATGTTTTTGTCTCGCTTCTTCAAACTCATTAAGACAATCCTTTTAAACAAAAGCGCCG  
 ATCATGGGTGGAAGTGTTACCGATAGAAGTTCCTTTATGTTAAAAAAGAATGTGCTTTG  
 GCGGATGTTGTGCAAAAGCAGCAGATGACATGTTTCAGAGTAA  
 >AA QryID: NC\_000964\_(+)\_1279301\_1279495 HitID: NC\_014976\_(+)\_3491841\_3492035

rank=1 bitscore=110.0 evalue=2.0E-22 perc\_ident=96.88 perc\_conserv=98.44 perc\_gaps=0.0  
query\_cvg=100.0 subj\_cvg=100.0 alpha=96.88 beta=4 prob=0.9986209404899974  
ATGAACAAAGAAACCCTAAAAACATACTCATGATTTTTTCAATATGCGCAACACTCCGA  
GAAACCGATGGTATGCGCATAGCTGATAGCTGGATTTTGAGTGAGATTATACGATTTTTG  
ATTTGCATGGTTGTGTTTTTGCATGACATTTCTATTAGATGCTGTTTTTCCAAACAAA  
AAAGAGTCACATTAA

>AA QryID: NC\_000964\_(+)\_1094747\_1094929 HitID: NC\_017195\_(+)\_1073416\_1073598  
rank=1 bitscore=65.5 evalue=8.0E-9 perc\_ident=100.0 perc\_conserv=100.0 perc\_gaps=0.0  
query\_cvg=100.0 subj\_cvg=100.0 alpha=100.0 beta=3 prob=0.9986209404409288  
ATGACAGCAAGAATGTCTGTGTTTTTACAAGAGAAACAATGGTGTCTTTTTCTTCTT  
CTCGCAAGGGTCATGGCATTCTTTCTTTTTCTTGAATGGTCGTGGAAATCTTTATCGAA  
CCACTCGTCAAAGAACCAAAAATCATCGAACCAATCGTGACAACGACATTTCTGTTCATG  
TGA

>AA QryID: NC\_000964\_(+)\_599684\_599824 HitID: NC\_014976\_(+)\_2789599\_2789739  
rank=1 bitscore=70.5 evalue=2.0E-10 perc\_ident=100.0 perc\_conserv=100.0 perc\_gaps=0.0  
query\_cvg=100.0 subj\_cvg=100.0 alpha=100.0 beta=2 prob=0.9986209404401633  
ATGAAAACAGAAATGACAAGGCCTGTTATTAAGGCAACTGACGGTACAAAAGTTTTGGGG  
ATTTTCAATAATATTTTGAGGATTTGGGTTATCAATATGATGATTGGAACAGCTATCACA  
GCATCCCAAAAGTTCGTGTGA

>AA QryID: NC\_000964\_(+)\_2898771\_2898929 HitID: NC\_014976\_(+)\_907295\_907453  
rank=1 bitscore=96.7 evalue=3.0E-18 perc\_ident=100.0 perc\_conserv=100.0 perc\_gaps=0.0  
query\_cvg=100.0 subj\_cvg=100.0 alpha=78.76 beta=3 prob=0.9986209404127278  
GTGCAGGGGAAGGTCTGTCTTATCTATCTTTTTTATATTACACATTTTTCACCTTTAT  
GATACACGCCAATGTTTTCAATTTGTTTAATTCAAAGAACAGCGGGAATTACAAACGAC  
ATGAACGATATCATGCAAATTCATAAAGGAGGAGATTGA

>AA QryID: NC\_000964\_(-)\_1784706\_1784837 HitID: NC\_017195\_(-)\_1759162\_1759293  
rank=1 bitscore=73.2 evalue=2.0E-11 perc\_ident=100.0 perc\_conserv=100.0 perc\_gaps=0.0  
query\_cvg=100.0 subj\_cvg=100.0 alpha=100.0 beta=1 prob=0.9986209403967288  
ATGTGGGAGCGATGGTTTGACAGACCGGCTGACATAGTTCAAATGTCTAACTTAATTTAT  
CAGCCTCTTTATGTAACAGTATATAAAGTTATTCAATTAGAAACAGTGTCAATCGAACGA  
TTGAATCTTTAA

>AA QryID: NC\_000964\_(+)\_376560\_376667 HitID: NC\_014976\_(+)\_2591035\_2591142  
rank=1 bitscore=59.3 evalue=3.0E-7 perc\_ident=100.0 perc\_conserv=100.0 perc\_gaps=0.0  
query\_cvg=100.0 subj\_cvg=100.0 alpha=100.0 beta=6 prob=0.9986209403824597  
TTGCGGCATCCCGCAAAAAATATTGCTGTAAATAAACTGGAATCTTTCGGCATCCCGCAT  
GAAACTTTTCACCCATTTTTCGGTGATAAAAACATTTTTTTCATTTAA

>AA QryID: NC\_000964\_(-)\_3317352\_3317465 HitID: NC\_017195\_(-)\_3113330\_3113443  
rank=1 bitscore=65.1 evalue=5.0E-9 perc\_ident=100.0 perc\_conserv=100.0 perc\_gaps=0.0  
query\_cvg=100.0 subj\_cvg=100.0 alpha=100.0 beta=2 prob=0.9986209403813575  
ATGCTTGAGAAGTTTACGACTTTTTCTTGCGCCTTCTTCGGATTAAATATGTATTCATA  
ATTCCGGCTGTGTATGACTACGATGTGATGAGCCCTAATTCAACAGGCAGGTGA

>AA QryID: NC\_000964\_(+)\_1300296\_1300430 HitID: NC\_017743\_(+)\_1348001\_1348135  
rank=1 bitscore=66.6 evalue=3.0E-9 perc\_ident=97.73 perc\_conserv=100.0 perc\_gaps=0.0  
query\_cvg=100.0 subj\_cvg=100.0 alpha=97.73 beta=4 prob=0.9986209403063384  
GTGCTTTCTGGCAATGTCTTTTTTATGTTTATGACAGCGTTAACATTTTCATTTTCAAAA  
AAGAGATTGATCCCAAAGGAATATAAAGGTAAAATAAAAACAAATCAAATGTTAACGTT  
AACATTTTGAAATAG

>AA QryID: NC\_000964\_(-)\_4005275\_4005379 HitID: NC\_014976\_(-)\_2012143\_2012247  
rank=1 bitscore=64.7 evalue=8.0E-9 perc\_ident=100.0 perc\_conserv=100.0 perc\_gaps=0.0  
query\_cvg=100.0 subj\_cvg=100.0 alpha=100.0 beta=1 prob=0.9986209403024802  
ATGTCAGTACTGATTTTTCTTCACTATAAGGTTCCAGCTCCTGGATATTTGTTGTATGAT  
GGAAACGGGGAAACCCATACAGCAGAAAGGGAGTTTTTTTCATGA

>AA QryID: NC\_000964\_(+)\_3573039\_3573176 HitID: NC\_017196\_(+)\_3433571\_3433708  
rank=1 bitscore=77.0 evalue=2.0E-12 perc\_ident=100.0 perc\_conserv=100.0 perc\_gaps=0.0  
query\_cvg=100.0 subj\_cvg=100.0 alpha=73.62 beta=4 prob=0.9986209402978412  
ATGGACAAAAAAGGACACGGATAACTGGAGAATCCGTGCCAAAAAAGTGTATTCATTAT  
AAAAAGGGGGTCAATTACTTTATTAATCATAACCGAAAAGCATTACACATGTGTTACAGC  
GGAATTAAACCCAGTAA

>AA QryID: NC\_000964\_(-)\_2302502\_2302657 HitID: NC\_017196\_(-)\_2104421\_2104576  
rank=1 bitscore=77.4 evalue=2.0E-12 perc\_ident=98.04 perc\_conserv=98.04 perc\_gaps=0.0  
query\_cvg=100.0 subj\_cvg=100.0 alpha=98.04 beta=2 prob=0.9986209402812911  
TTGTTGAAAAATATCCGAAAACATTTATAGTAAGTAACAATATTAATAGTTGGAGGGTT

CAAATCGAAAGAAAGCTATATAAATATAAAAAACACGAAAGAACAAAACAAGGTGAGGGCG  
GCCTGTATTTATCTTATTTGCAAAAACAGCCCATAA  
>AA QryID: NC\_000964\_(+)\_3335127\_3335369 HitID: NC\_019896\_(-)\_891612\_891854  
rank=1 bitscore=126.0 eval=4.0E-27 perc\_ident=98.75 perc\_cons=98.75 perc\_gaps=0.0  
query\_cvg=100.0 subj\_cvg=100.0 alpha=76.48 beta=1 prob=0.9986209402560602  
TTGCCTACGAGAAAAATACCCTGTAGTCCTTTTCATTTATAAATCGAGGTTTCAAATAAT  
AAGTCAGCTCTTAGCAGCCGAGCTCCCTTCTCCAATCTATAAACAGACCGCGTTTTTTC  
TCGAAAAAATACTCTGAAGACAATTGCTGCGTTTTTAATAGTTTTGATAACGCGTTCTCT  
CTTACACCTTTAGACAAAATATTCATTTTTTCTTTTTTAGACTTAAATCTATGTCGAAAA  
TAA  
>AA QryID: NC\_000964\_(+)\_692590\_692730 HitID: NC\_017743\_(+)\_717577\_717702  
rank=1 bitscore=76.3 eval=3.0E-12 perc\_ident=97.56 perc\_cons=100.0 perc\_gaps=0.0  
query\_cvg=89.13 subj\_cvg=100.0 alpha=92.26 beta=4 prob=0.9986209402439195  
GTGTTGTTAGAATTAGTGAATATTATCGGAGTCTGGGAGCGAGTTGGCCTGACTCCGGCA  
AACGGCCTTGCCAAAGAGGGCGGAGCGAGCTTCATATCTGTCCTCGTTTTTTCTGTGTC  
AAAAAACTTAGAGGAGATTAG  
>AA QryID: NC\_000964\_(+)\_1492057\_1492185 HitID: NC\_017196\_(+)\_1497554\_1497682  
rank=1 bitscore=59.7 eval=2.0E-7 perc\_ident=100.0 perc\_cons=100.0 perc\_gaps=0.0  
query\_cvg=100.0 subj\_cvg=100.0 alpha=100.0 beta=1 prob=0.9986209401718704  
TTGAGACTAGTTACCCTGTACATGACCATGTTAAACGTTTTATTCAAAAATGTCGAAGCC  
AAAGACATACATGATTTGTTAAAAATTGACTCAGGAAATCTGCTTTTATATAATGGCATT  
GCAATATAA  
>AA QryID: NC\_000964\_(+)\_2854637\_2854759 HitID: NC\_020244\_(+)\_2666264\_2666386  
rank=1 bitscore=68.9 eval=4.0E-10 perc\_ident=100.0 perc\_cons=100.0 perc\_gaps=0.0  
query\_cvg=100.0 subj\_cvg=100.0 alpha=71.3 beta=4 prob=0.9986209401673999  
TTGTTAGAAAAACAATTGTTTTTCCCAGAAATATCATGTTCTTTTTTCTGGCTTTGGTT  
GATTTGCAGCCAGGCAGAACATTTTATGTATTACTGCTTGGGGAACATATCCAGTGGGTT  
TGA  
>AA QryID: NC\_000964\_(-)\_1443729\_1443980 HitID: NC\_019896\_(+)\_2625951\_2626223  
rank=1 bitscore=127.0 eval=2.0E-27 perc\_ident=98.72 perc\_cons=100.0 perc\_gaps=0.0  
query\_cvg=93.98 subj\_cvg=86.67 alpha=66.97 beta=1 prob=0.998620940167354  
GTGTGGGATGCCCCACAAAAAAGAAAGCAACCTACAACATATTTTCCTATGTGGTTATT  
CAGGACATAAGGATTCCTTTAAATATTTTAAAGTATTAGAATACAAGGACAGGGATAT  
TATTTTTTATTAAAGTCAAGAGCCCCCGTTACTTTAAGTACATTTATTACAGTGTAAT  
CTTTTTTACAGGTCATTTAGTAGTAGCCCCAGGAAATGCGAATTTACAACGTTAATCAA  
ATTCAAATATAA  
>AA QryID: NC\_000964\_(+)\_2367708\_2367854 HitID: NC\_017196\_(+)\_2169636\_2169764  
rank=1 bitscore=70.1 eval=3.0E-10 perc\_ident=100.0 perc\_cons=100.0 perc\_gaps=0.0  
query\_cvg=87.5 subj\_cvg=100.0 alpha=93.75 beta=1 prob=0.9986209401646594  
ATGCCCCCGGCAAATAAGATGCTTCTGTACGGAAGGGAATTATTGAGTCTTATTAGTTTA  
CCAAAAGATCTTGAGATAGAAAATGAAAAAAGGAAGATCGCCCTCTGTACAGTAAAGCAG  
CTCTTTGACCTGCCGGCTTGTAAGTAA  
>AA QryID: NC\_000964\_(+)\_1874014\_1874172 HitID: NC\_017195\_(+)\_1848524\_1848682  
rank=1 bitscore=92.0 eval=8.0E-17 perc\_ident=100.0 perc\_cons=100.0 perc\_gaps=0.0  
query\_cvg=100.0 subj\_cvg=100.0 alpha=72.12 beta=2 prob=0.9986209401630672  
ATGATTAAAAACAAAATCTCATGGTTTGTCACCCCATGTCCGTGAATACAATAAGAAAT  
AAAGTATTTCTCGGGAAAGCGCAGGATTCCTTATTGTTCCCGAAAAAAGCAATTGTTTCG  
ACACATGATAGGCGTTTGTCAATCGGCATCCGCTTGA  
>AA QryID: NC\_000964\_(+)\_718436\_718597 HitID: NC\_014976\_(+)\_2941663\_2941824  
rank=1 bitscore=90.5 eval=2.0E-16 perc\_ident=94.34 perc\_cons=96.23 perc\_gaps=0.0  
query\_cvg=100.0 subj\_cvg=100.0 alpha=94.34 beta=5 prob=0.9986209401494872  
ATGTGTGCTCCTGCCGATACAGGACTACCATGCAGGTAAGTCCATATGCTCTCTTTTTT  
TATGAAAAAAGAATCAAAACACCTTTTTTCAAGTGAATAACGAGATTAACGGCTTTTTCCGT  
TTTTCCGCGCTATGTGAATTTGTTATAATGTTTAAATGGTAA  
>AA QryID: NC\_000964\_(-)\_1874018\_1874179 HitID: NC\_017195\_(-)\_1848528\_1848689  
rank=1 bitscore=99.8 eval=4.0E-19 perc\_ident=100.0 perc\_cons=100.0 perc\_gaps=0.0  
query\_cvg=100.0 subj\_cvg=100.0 alpha=73.96 beta=1 prob=0.9986209401468538  
ATGATATTCAAGCGGATGCCGATTGTGACAAACGCCTATCATGTGTCGAAACAATTGCTT  
TTTTCCGGAACAATAAGGAATCCTGCGCTTTCCCGAGAAATACTTTATTTCTTATTGTAT  
TCACGGACATGGGGTGGACAAACCATGAGATTTTGTAAAAA  
>AA QryID: NC\_000964\_(+)\_972872\_973015 HitID: NC\_016047\_(+)\_1082937\_1083113



rank=1 bitscore=61.6 evalue=1.0E-7 perc\_ident=97.87 perc\_conserv=100.0 perc\_gaps=0.0  
query\_cvg=100.0 subj\_cvg=81.03 alpha=100.0 beta=2 prob=0.9986209401131871  
TTGCTTTCGTATCCTGCGGTAAAAATTGATACTAAAAAAGTGACAATGACACCCATCATG  
ATGATTGTTTTACCGTCTCTCCCCCTCTTCAATTTTTCCGTGCTGTCCGAGTCTGGATG  
ATTCTGTATTTTTCTTTATTATGA  
>AA QryID: NC\_000964\_(+)\_3257454\_3257579 HitID: NC\_017196\_(+)\_3020116\_3020259  
rank=1 bitscore=68.2 evalue=6.0E-10 perc\_ident=97.56 perc\_conserv=100.0 perc\_gaps=0.0  
query\_cvg=100.0 subj\_cvg=87.23 alpha=92.68 beta=2 prob=0.9986209401115949  
GTGCTGAAATTGAGAAAGATTCTTAATCTCCTTGATTTTAACGGGTTTCGCATTTTCACT  
AAGCAAGACTATAGTCCTTCATACCGTATTTTCAAATTGAATATGCGATTCTTGCGCTT  
TCCTGA  
>AA QryID: NC\_000964\_(+)\_1744246\_1744365 HitID: NC\_017195\_(+)\_1718717\_1718836  
rank=1 bitscore=66.2 evalue=3.0E-9 perc\_ident=100.0 perc\_conserv=100.0 perc\_gaps=0.0  
query\_cvg=100.0 subj\_cvg=100.0 alpha=76.51 beta=3 prob=0.9986209401098036  
ATGTTTTTTTATATGGAAAAAGCGCATCTTTTATATTACCGGTATTTCTTTTGATCAT  
AAGATGAAGGGGAGCTTAACAACCTAGAGATCCAGTATATACAAAGAAGGTGAACGTTTAG  
>AA QryID: NC\_000964\_(-)\_2403381\_2403503 HitID: NC\_017196\_(-)\_2205299\_2205421  
rank=1 bitscore=55.1 evalue=6.0E-6 perc\_ident=100.0 perc\_conserv=100.0 perc\_gaps=0.0  
query\_cvg=100.0 subj\_cvg=100.0 alpha=100.0 beta=4 prob=0.9986209400694004  
ATGCAACGGAAAACTGCTGATTTTCAGCAGTTTTTTTTCGTTAAAAAACATGGAAAAACAT  
AACGTTTATTCTATGCACAGATCATATGAAGGTGTATACTATTCTCTGAAAGGGAGCATG  
TGA  
>AA QryID: NC\_000964\_(+)\_2119207\_2119317 HitID: NC\_014479\_(+)\_2106773\_2106883  
rank=1 bitscore=58.2 evalue=8.0E-7 perc\_ident=97.22 perc\_conserv=100.0 perc\_gaps=0.0  
query\_cvg=100.0 subj\_cvg=100.0 alpha=74.88 beta=13 prob=0.9986209400606278  
ATGGAAATCGAAAGAATCATTCAAGTATATTTGCACCTTTTAGGCGTGATTTTCGCTTTCT  
TTTATTTATGCCCAAATGTTTAGAAAAACGAAACCGACAAAAAAGAATAG  
>AA QryID: NC\_000964\_(+)\_3343894\_3344031 HitID: NC\_014976\_(+)\_1351492\_1351629  
rank=1 bitscore=70.5 evalue=2.0E-10 perc\_ident=100.0 perc\_conserv=100.0 perc\_gaps=0.0  
query\_cvg=100.0 subj\_cvg=100.0 alpha=76.84 beta=2 prob=0.9986209400297015  
ATGAACAAGCTAAGCTGGAGAGGCGATGTTTCGCGGAACGGATGAAAACAGAAATGCCGGC  
AGCCCGCAAAAACAGGACCTAAAGATATGGAAACAGGAGATTTCGCGCTCTCCAAAGGG  
ACTAATTTACAATTTTAA  
>AA QryID: NC\_000964\_(-)\_4066033\_4066155 HitID: NC\_017743\_(-)\_3971147\_3971269  
rank=1 bitscore=74.7 evalue=8.0E-12 perc\_ident=100.0 perc\_conserv=100.0 perc\_gaps=0.0  
query\_cvg=100.0 subj\_cvg=100.0 alpha=74.05 beta=2 prob=0.9986209400076091  
ATGAAAAGAAATCCGTCAAAGAGGAACCTACAATTATTTCTCAGCCCCCTCTATCTTTG  
AATGAAAACGGTAAAGATTGTATACTGGGTACAAACCTTTTTATGTAAATGTTCCGTTT  
TAA  
>AA QryID: NC\_000964\_(-)\_4014527\_4014640 HitID: NC\_017743\_(-)\_3915857\_3915970  
rank=1 bitscore=62.8 evalue=3.0E-8 perc\_ident=100.0 perc\_conserv=100.0 perc\_gaps=0.0  
query\_cvg=100.0 subj\_cvg=100.0 alpha=67.36 beta=4 prob=0.9986209399476091  
ATGGGCCTGAAAAGAATGGAATGCACGTCAATTTTACAAAATATTATGTTTTTCGCT  
TCAAATCATACTATTTGATTTATTGCTGGGTTAGGTGCATCTGGTACCATTTAA  
>AA QryID: NC\_000964\_(-)\_2096129\_2096311 HitID: NC\_014976\_(-)\_207624\_207806  
rank=1 bitscore=87.0 evalue=2.0E-15 perc\_ident=95.0 perc\_conserv=98.33 perc\_gaps=0.0  
query\_cvg=100.0 subj\_cvg=100.0 alpha=95.0 beta=3 prob=0.9986209399123349  
TTGTATATACACATTAATATAGAAGAAAAATAATCATTCGCTTTTAGCAATAAAGGCTATT  
TTTTTTATTGTAATATATTTTTGTTTGTGCAATTGTCAGGTATTTTGGAGAAAAAACAG  
TTTTATTCACTGGAAAAAGTTTTCTAAACAATTGTTCTGACCTCTTGATTAAGCGCC  
TGA  
>AA QryID: NC\_000964\_(-)\_1252558\_1252791 HitID: NC\_017196\_(-)\_1242453\_1242686  
rank=1 bitscore=120.0 evalue=3.0E-25 perc\_ident=96.1 perc\_conserv=97.4 perc\_gaps=0.0  
query\_cvg=100.0 subj\_cvg=100.0 alpha=78.96 beta=2 prob=0.9986209399110795  
ATGCTGAGCGAGACCGCCTCGTTAAAAAAACAAAAAACCGGAGTTCTCCGGTTTCTTTGC  
CAGGCTATTGAGGCTTTTTCTTTTTATTTCCGCACCCGAGCCTTTCTTTTTATCTTTT  
TTGATTGATACGATGAATCTGTATATGGAGATTTTGGGAAGGTTTATGATGCTGATTCA  
TTTTTGTCCTTCTTTCTTTATGTCATATATGCTACTTTATGCGTATTCTGA  
>AA QryID: NC\_000964\_(-)\_3775382\_3775522 HitID: NC\_014976\_(-)\_1776749\_1776889  
rank=1 bitscore=75.9 evalue=6.0E-12 perc\_ident=97.83 perc\_conserv=100.0 perc\_gaps=0.0  
query\_cvg=100.0 subj\_cvg=100.0 alpha=73.65 beta=4 prob=0.9986209398918655  
ATGATCACACAAGCTGTTTATGCTTTCTGGGCGGAAATGGCTAAAAATGAACGGCATTTT

AAGCGATTTTGGACAGATCGTGAAAGCAGCACAAAAGGCAGCATGTCCTATATCTTTTGG  
CATTTTCGTATTCTAGCATAA

>AA QryID: NC\_000964\_(+)\_3615472\_3615585 HitID: NC\_017196\_(+)\_3474702\_3474815  
rank=1 bitscore=65.9 evalue=3.0E-9 perc\_ident=100.0 perc\_conserv=100.0 perc\_gaps=0.0  
query\_cvg=100.0 subj\_cvg=100.0 alpha=74.76 beta=2 prob=0.9986209398761727  
TTGCATTTTGGTGCCGGTCAAACTTATCCATGGTGCCGCTGTTCTAATCAGCGGCACT  
TTTTTTATTACATCATCAAGTCCGCCGCCAGATTCCGAGAATAAAAGAAAATAG

>AA QryID: NC\_000964\_(-)\_3153779\_3153904 HitID: NC\_014976\_(-)\_1162091\_1162216  
rank=1 bitscore=70.9 evalue=1.0E-10 perc\_ident=100.0 perc\_conserv=100.0 perc\_gaps=0.0  
query\_cvg=100.0 subj\_cvg=100.0 alpha=76.94 beta=1 prob=0.9986209398408984  
ATGGTAAGCGGATACAACCTTTGCTATCAGTGGAGAAAGAAATTTAAGCTTTGTTTCTTT  
TTCATTTCTGAAATTAGGTTTATAATAGGTAAGGCAGGCCATTTGGACTGCATGATCTGT  
GTTTGA

>AA QryID: NC\_000964\_(+)\_1298374\_1298499 HitID: NC\_017195\_(+)\_1275379\_1275498  
rank=1 bitscore=64.3 evalue=9.0E-9 perc\_ident=97.44 perc\_conserv=100.0 perc\_gaps=0.0  
query\_cvg=95.12 subj\_cvg=100.0 alpha=95.06 beta=2 prob=0.998620939784634  
TTGTGTTTGCTATTTTCAGAGAGAGTAAAGGATTTTGACTTATTCAATTGTTTATTTTAA  
GATAAAAATAATACTGAATATGGCAAGATGAAAACTGGGTAGTAAACATTTATTTTGT  
AAATGA

>AA QryID: NC\_000964\_(-)\_3918318\_3918431 HitID: NC\_020244\_(-)\_3759706\_3759819  
rank=1 bitscore=56.2 evalue=2.0E-6 perc\_ident=97.3 perc\_conserv=97.3 perc\_gaps=0.0  
query\_cvg=100.0 subj\_cvg=100.0 alpha=100.0 beta=3 prob=0.9986209396692118  
GTGAATAAAGTTGGAGCAATTTTGTGCGATTTTATGACATTTAAGCGAAAATGGGATGAA  
GTTTATAAAAAAATAAAGCTAATAAGTGAAGTTTGTATAGCATAACAAAGTAG

>AA QryID: NC\_000964\_(+)\_3105954\_3106109 HitID: NC\_017196\_(+)\_2868700\_2868852  
rank=1 bitscore=94.7 evalue=1.0E-17 perc\_ident=98.0 perc\_conserv=100.0 perc\_gaps=0.0  
query\_cvg=98.04 subj\_cvg=100.0 alpha=76.18 beta=1 prob=0.9986209396239707  
TTGATGCATTGGATTCAATTTTACCCAGTGACATTGACCTAGTCACCTATTTAGCATGT  
AGAAAACCTTTCCGTTTCATATGTTCAAATTCTGTTCTATTTTTAGTGTATACGAGGACA  
AGCCCTAATGACAAACAACAACTGCACTTGCTTGA

>AA QryID: NC\_000964\_(+)\_2913361\_2913486 HitID: NC\_020244\_(+)\_2724987\_2725112  
rank=1 bitscore=53.1 evalue=2.0E-5 perc\_ident=100.0 perc\_conserv=100.0 perc\_gaps=0.0  
query\_cvg=100.0 subj\_cvg=100.0 alpha=76.79 beta=3 prob=0.9986209395025776  
ATGATGATTTTTAGTATAGCATCTCCCATTCGTTACGCTATTTTAATGCTTACAAATTA  
TTTTTTCCTGATCACAGCCGGTTTACTCATTTTATATGGTTGAATGGGATATGCTCTTT  
TTTTAA

>AA QryID: NC\_000964\_(-)\_3893184\_3893300 HitID: NC\_017195\_(-)\_3696716\_3696832  
rank=1 bitscore=67.0 evalue=1.0E-9 perc\_ident=94.74 perc\_conserv=97.37 perc\_gaps=0.0  
query\_cvg=100.0 subj\_cvg=100.0 alpha=97.37 beta=3 prob=0.9986209394879257  
TTGGATTATGCTGAAAAAGAACAGCGGACCGATCAGATTTGCTCTGGGCAGCCGCTGTT  
TTTCAGAAACATACACAACTTTTCGCATATTGTTTGTATCCCTAGCGCAACTTGA

>AA QryID: NC\_000964\_(+)\_1219694\_1219822 HitID: NC\_017196\_(+)\_1209633\_1209761  
rank=1 bitscore=62.8 evalue=3.0E-8 perc\_ident=100.0 perc\_conserv=100.0 perc\_gaps=0.0  
query\_cvg=100.0 subj\_cvg=100.0 alpha=71.47 beta=1 prob=0.9986209393575609  
ATGAACCTTGTTCACTCTATTGTTACAGCTTTTTACAAAATAATCAGAAAAGACGGAAC  
AGAATAAAAGTTGTGGAACTCAGGTTCAATTTGTCTGATATTTCTGAGGATTTAGCCGTA  
AGGAGCTGA

>AA QryID: NC\_000964\_(+)\_2987572\_2987685 HitID: NC\_017743\_(+)\_2851901\_2852014  
rank=1 bitscore=52.4 evalue=3.0E-5 perc\_ident=97.3 perc\_conserv=97.3 perc\_gaps=0.0  
query\_cvg=100.0 subj\_cvg=100.0 alpha=100.0 beta=3 prob=0.9986209390469206  
ATGATTAAACATAACATGATCATTGCCCTAAAAACAATGAAAAGGGATCTCCATCCTCCC  
TATGAAACCTTACCTATTATACAATTAATAAATTGTTTTAAATAAAATTTAA

>AA QryID: NC\_000964\_(+)\_2733649\_2733762 HitID: NC\_017196\_(+)\_2494860\_2494994  
rank=1 bitscore=55.5 evalue=4.0E-6 perc\_ident=100.0 perc\_conserv=100.0 perc\_gaps=0.0  
query\_cvg=100.0 subj\_cvg=84.09 alpha=64.05 beta=1 prob=0.9986209389000822  
TTGGAAAATGCGTTCTATACTGCAACTGTGCCCAAGCCGTTAACCTTCAAATCTAATCTG  
AGAATCACTGGCTCTACAGAGAATAATAAAAAAACTCTAATAACGAGTGCTGA

>AA QryID: NC\_000964\_(-)\_329633\_329755 HitID: NC\_017743\_(-)\_323950\_324072  
rank=1 bitscore=53.5 evalue=2.0E-5 perc\_ident=100.0 perc\_conserv=100.0 perc\_gaps=0.0  
query\_cvg=97.5 subj\_cvg=97.5 alpha=74.62 beta=1 prob=0.998620938837357  
ATGTTTCTCTTTGATGTCTTTTGTGTGAAGTATTTACATTTATATTGTGCAACACT  
TCACAACTTTTGAAGAGAAAAGTTTTGTCTGATTTATGAACAAAAAGAAACCATCAT

TGA

>AA QryID: NC\_000964\_(+)\_1933117\_1933281 HitID: NC\_017195\_(+)\_1915129\_1915272  
rank=1 bitscore=77.0 evalue=3.0E-12 perc\_ident=95.74 perc\_conserv=100.0 perc\_gaps=0.0  
query\_cvg=87.04 subj\_cvg=100.0 alpha=89.54 beta=1 prob=0.9986209386600823

TTGCTTTTTAATTTAAGATATTGTTTGCCTATTACGGTGAAACAGATACAATAAAGCTT  
GAACAGCTTTTTTTGAATACCTTGTCAGCTGGGTTTCGGCCGTTTCGATTTGCGAAGGTC  
TGCTGCTTTATATATAATAAAACAAACATACGTTCTCATAGTGTA

>AA QryID: NC\_000964\_(+)\_1442020\_1442151 HitID: NC\_017195\_(+)\_1419557\_1419688  
rank=1 bitscore=52.4 evalue=4.0E-5 perc\_ident=100.0 perc\_conserv=100.0 perc\_gaps=0.0  
query\_cvg=100.0 subj\_cvg=100.0 alpha=71.86 beta=1 prob=0.9986209386438689

TTGATAGTACAGACAGATTAAGGCGTACAATTTGTACGTCTTTTCTTTTTTATCCGAA  
AGAAAAAATGCCTATCTAGAGATCATAGGCATTAAATATTATTATCAATATCTTCATTTA  
TTTTTTGGCTAA

>AA QryID: NC\_000964\_(+)\_282240\_282386 HitID: NC\_020244\_(+)\_275281\_275427  
rank=1 bitscore=84.7 evalue=1.0E-14 perc\_ident=95.83 perc\_conserv=95.83 perc\_gaps=0.0  
query\_cvg=100.0 subj\_cvg=100.0 alpha=68.84 beta=3 prob=0.9986209385689571

GTGCAAATCTGCTGGGGAGAGGTCAATGATGTGAATCCAGGAATTGAGGCTGCGGCGCTT  
CGACAGCGGAAACGTGAAGCTTGACTGCACCGGACGCTGCTTTGATGCCCAACAGCCCA  
TTATGTTTGCTGTTTTAGATGAATAA

>AA QryID: NC\_000964\_(+)\_4005262\_4005411 HitID: NC\_017195\_(+)\_3806975\_3807109  
rank=1 bitscore=83.6 evalue=3.0E-14 perc\_ident=93.18 perc\_conserv=95.45 perc\_gaps=0.0  
query\_cvg=89.8 subj\_cvg=100.0 alpha=90.58 beta=3 prob=0.9986209385247876

ATGAATTGGATAATCATGAAAAAACTCCCTTTCTGCTGTATGGGTTTCCCGTTTCCAT  
CATACAACAAATATCCAGGAGCTGGAACCTTATAGTGAAGAAAAATCAGTACTGACATGC  
TGGTATCCCGCCAACATCATATCAGCATAG

>AA QryID: NC\_000964\_(+)\_3361158\_3361277 HitID: NC\_017195\_(+)\_3158695\_3158814  
rank=1 bitscore=60.5 evalue=1.0E-7 perc\_ident=97.44 perc\_conserv=97.44 perc\_gaps=0.0  
query\_cvg=100.0 subj\_cvg=100.0 alpha=73.34 beta=2 prob=0.9986209383832925

ATGAATCAATCCCTTCATATATTTGCTTTTTATTGTACCAGTGCTGCGTTGGATGCCGCA  
AAAACGATTTGGCGTGAAATAGCGGCAGATGAGACGAAAGCATCCTTTCAGAACAAATGA

>AA QryID: NC\_000964\_(-)\_2435871\_2436038 HitID: NC\_017196\_(-)\_2236749\_2236883  
rank=1 bitscore=88.2 evalue=1.0E-15 perc\_ident=97.73 perc\_conserv=100.0 perc\_gaps=0.0  
query\_cvg=80.0 subj\_cvg=100.0 alpha=69.36 beta=1 prob=0.9986209383120702

TTGACCTCCTTCAATTTACAAGCAGCTGGATAGTGCTGCTTTGTGAGGACCTGAATCAT  
GAAAAATACAGTTCCGTTAGGTTAGACGGAGATAAAGAGATTACAGGTTTCATTTTTATT  
TTTAGTAAAGCTCGGGAGATTGTTTTCCCCCGAAAGGTGTGGTATAA

>AA QryID: NC\_000964\_(-)\_4166699\_4166812 HitID: NC\_017196\_(-)\_4049515\_4049628  
rank=1 bitscore=49.7 evalue=2.0E-4 perc\_ident=97.3 perc\_conserv=100.0 perc\_gaps=0.0  
query\_cvg=100.0 subj\_cvg=100.0 alpha=97.3 beta=2 prob=0.998620938037883

GTGATGGGCATTCTTTCAAAGAATGTCTTTTCCTTTTCATGTTTCACATGAAACATTA  
GCGTCATTTTACTTGCGATTTGGACTTATGTTAAATATAAAAGTAAATTTAG

>AA QryID: NC\_000964\_(-)\_2966284\_2966406 HitID: NC\_017195\_(-)\_2768241\_2768363  
rank=1 bitscore=47.4 evalue=0.001 perc\_ident=100.0 perc\_conserv=100.0 perc\_gaps=0.0  
query\_cvg=100.0 subj\_cvg=100.0 alpha=72.92 beta=1 prob=0.9986209376434203

TTGCGAACACAAAGGGAGCTGAAGCTAGAAAGCCATTATGCGCTTTTTAGCTTATGCTCC  
TTTTATTTTTATAAAGAAACGAGAGTGTCAGCTTTTTCTTTTTTCATTTTTTTGTAAAA  
TAA

>AA QryID: NC\_000964\_(+)\_1895052\_1895165 HitID: NC\_020244\_(+)\_1900917\_1901054  
rank=1 bitscore=63.5 evalue=2.0E-8 perc\_ident=94.44 perc\_conserv=94.44 perc\_gaps=0.0  
query\_cvg=97.3 subj\_cvg=80.0 alpha=83.72 beta=1 prob=0.9986209375911366

GTGGAACCGTATTTTGTACGCGAACACTTCAAGAAGTGGGGAAGCTTAGGAATGCCAATG  
GGTAAGATGTATGAAACCGCGCTAACGACGGTAGAGGGATCTCTTGATTTATGA

>AA QryID: NC\_000964\_(+)\_3996412\_3996540 HitID: NC\_020244\_(+)\_3838259\_3838387  
rank=1 bitscore=48.1 evalue=7.0E-4 perc\_ident=97.62 perc\_conserv=100.0 perc\_gaps=0.0  
query\_cvg=100.0 subj\_cvg=100.0 alpha=77.9 beta=7 prob=0.9986209374556582

ATGACAAAACATGCAATCGCTGCCAAGAGTCTCTTGAAAAAATGGATCATTTCCAGGCCG  
CTTAACATGAAAAAGAAATCCAGCCCATTTCAAAAAATCAGAAAAATGTTCAAACGCTTC  
TTCAAATAA

>AA QryID: NC\_000964\_(+)\_1533861\_1533971 HitID: NC\_014976\_(+)\_3744356\_3744466  
rank=1 bitscore=48.1 evalue=6.0E-4 perc\_ident=97.22 perc\_conserv=100.0 perc\_gaps=0.0  
query\_cvg=100.0 subj\_cvg=100.0 alpha=97.22 beta=2 prob=0.9986209372513766

TTGAATTTTTTGCTGCATTCTTGATGAAAGTTCAAGAAACGTGCAATTACATTATGTG

CTGTGGCATATATATCGAGTAAAGCTTCTGTATGAAGAAGATATTGTATGA  
>AA QryID: NC\_000964\_(+)\_3942101\_3942229 HitID: NC\_017743\_(+)\_3841580\_3841708  
rank=1 bitscore=57.4 evalue=1.0E-6 perc\_ident=97.62 perc\_conserv=97.62 perc\_gaps=0.0  
query\_cvg=100.0 subj\_cvg=100.0 alpha=64.78 beta=2 prob=0.9986209371840278  
ATGCTCCGTCGTCGACGCGGGCATTTTTGTCATTTTCAGCCGGTATTTCTCACTTTTTTC  
ATTTTGATTGTCAACTTTTCATTTGATACGATGAACAAGCCGACTTTTCTTCAGCAAAGG  
AGGTTTTAA  
>AA QryID: NC\_000964\_(-)\_408912\_409028 HitID: NC\_017196\_(-)\_405244\_405360  
rank=1 bitscore=68.9 evalue=4.0E-10 perc\_ident=97.37 perc\_conserv=97.37 perc\_gaps=0.0  
query\_cvg=100.0 subj\_cvg=100.0 alpha=63.36 beta=1 prob=0.9986209366944745  
ATGCAAGGGTTTGCCAACACGCTGAAACAGGGCGCCTCCGGCGGCCCTGTTTTTTTGTG  
AGCCCCTTTCGCCTATTCCGCCCTTCTGTCAGATGTGCTACAATGACAATCGACTGA  
>AA QryID: NC\_000964\_(+)\_3016411\_3016593 HitID: NC\_017743\_(+)\_2880746\_2880937  
rank=1 bitscore=80.9 evalue=2.0E-13 perc\_ident=96.15 perc\_conserv=96.15 perc\_gaps=0.0  
query\_cvg=86.67 subj\_cvg=82.54 alpha=59.08 beta=1 prob=0.9986209361852785  
ATGTCGGCTTTTCAAGTCAACTTGCCTATTGATAACGCTTACAATAAGAAGTCGTTATTT  
TCAGACACATTCACTATAGGTTTTGTATTGATGAACGCTTACAATTTGCGGTTTTTCCCT  
CTGTATTTTGTGTTCAAAGCTGGATTCAATTCGTCAAGTCCGGTCTTCAAAGCATAA  
TAA  
>AA QryID: NC\_000964\_(-)\_3951940\_3952053 HitID: NC\_017743\_(-)\_3854065\_3854178  
rank=1 bitscore=60.1 evalue=2.0E-7 perc\_ident=91.89 perc\_conserv=94.59 perc\_gaps=0.0  
query\_cvg=100.0 subj\_cvg=100.0 alpha=91.89 beta=3 prob=0.9986209359125764  
ATGCTCAAAAAGTTTCATTTTTTCCCTAATCTCCCTCAAATTAATATATCGGCGTATGTT  
TTTGAANAATGAATCTTTATACCTGCAAGGGCAAGAATGGAATGTTTCGAGCTGA  
>AA QryID: NC\_000964\_(+)\_432090\_432218 HitID: NC\_017195\_(+)\_423438\_423566  
rank=1 bitscore=67.8 evalue=9.0E-10 perc\_ident=95.24 perc\_conserv=97.62 perc\_gaps=0.0  
query\_cvg=100.0 subj\_cvg=100.0 alpha=69.05 beta=2 prob=0.9986209358676108  
TTGTATTTTTCACGAGGAATAATGTTAGGTTTGCTGACCGTATGCCTGCGTTATAAAGAT  
AAATATGGTAAACAGCCTAACGTTTTGGGATGGAAAATGGTTAGAATGATTAGTAAAT  
GATAAATGA  
>AA QryID: NC\_000964\_(+)\_1422013\_1422138 HitID: NC\_020244\_(+)\_1425891\_1426016  
rank=1 bitscore=53.5 evalue=1.0E-5 perc\_ident=100.0 perc\_conserv=100.0 perc\_gaps=0.0  
query\_cvg=100.0 subj\_cvg=100.0 alpha=100.0 beta=15 prob=0.9986209357981493  
TTGAAGCCGAGCCGCTCTGAGAACTTGCCGTTTTTGCCGAAGTGTGTGAAACTGCAT  
ATCTTATCAAGCGCTCAAAAAGATGAAATCATCAATGTTAACAAAAAGAAACAAAAAAC  
CGCTGA  
>AA QryID: NC\_000964\_(+)\_1557919\_1558029 HitID: NC\_014976\_(+)\_3768415\_3768525  
rank=1 bitscore=43.5 evalue=0.016 perc\_ident=100.0 perc\_conserv=100.0 perc\_gaps=0.0  
query\_cvg=100.0 subj\_cvg=100.0 alpha=100.0 beta=1 prob=0.9986209357644825  
GTGAGCCGCTCACTGATCATCAAGTTCGGCGAAGGCTGGCGATTGAAACGCATAAAGCGC  
CAAAAAACAAGACATAAAAAAGACCAAAGCCGCCTAAGGCTTTGGTCTTGA  
>AA QryID: NC\_000964\_(+)\_2036875\_2037015 HitID: NC\_017195\_(+)\_2023622\_2023753  
rank=1 bitscore=54.3 evalue=2.0E-5 perc\_ident=97.37 perc\_conserv=97.37 perc\_gaps=0.0  
query\_cvg=82.61 subj\_cvg=88.37 alpha=83.24 beta=2 prob=0.9986209350912856  
ATGTTATTCCTTTTCATATAAAATAGTTTACATTTTATAAAATCGCTTCACTTTTCTATT  
TTGTCAGCAAAAAAAGTGAACACATTAACTTATGAAACCTGCCGCACCTGTGGATTGC  
AAATATGATATAAGCCCATAG  
>AA QryID: NC\_000964\_(+)\_1906790\_1906975 HitID: NC\_017196\_(+)\_1911627\_1911812  
rank=1 bitscore=79.7 evalue=5.0E-13 perc\_ident=93.44 perc\_conserv=93.44 perc\_gaps=0.0  
query\_cvg=100.0 subj\_cvg=100.0 alpha=78.0 beta=1 prob=0.9986209347740772  
ATGCTAGAGCTGCTGTTGAACAGCGTGTGAGTCGCCAGTCTGATCTGTGAATGGGAGAAT  
TCTGCATGCGCGAAAAAGAGAGAGAGGTGTATGTTGTCATTTTCGTTCACTTTGTTTGA  
GCCGCAACTGTTATGTTTGAAGTGGGATTCCTGTTTCAGCCAATTTATTTTTCGATTTTTG  
TTTTAA  
>AA QryID: NC\_000964\_(-)\_2897372\_2897494 HitID: NC\_017196\_(-)\_2656389\_2656511  
rank=1 bitscore=44.7 evalue=0.008 perc\_ident=97.5 perc\_conserv=97.5 perc\_gaps=0.0  
query\_cvg=100.0 subj\_cvg=100.0 alpha=97.5 beta=2 prob=0.9986209347651056  
ATGCTGTTGACACTGCGTCCAAAGCGGCGTAATATGAGTTCAACAAAAGATAAATGCAAG  
CTTCACAAGCGAAAATCATCGCAGTATGATTCTAAAAAATGAAAAACAAACGACCTTCT  
TGA  
>AA QryID: NC\_000964\_(-)\_1035367\_1035489 HitID: NC\_019896\_(+)\_3039948\_3040058

rank=1 bitscore=56.2 evalue=2.0E-6 perc\_ident=97.22 perc\_conserv=100.0 perc\_gaps=0.0  
query\_cvg=90.0 subj\_cvg=100.0 alpha=66.41 beta=1 prob=0.9986209344353583  
TTGAGGTACGCGGTGATTGTTGCCTAAGCAGAGGGCCCCATCATACCACCTCCAAAAGT  
CAAAGTTTGATTATAAATTGTATATTTATTGTAACACAACCTCATTCCAAAAATGATTTT  
TAA

>AA QryID: NC\_000964\_(+)\_599463\_599582 HitID: NC\_017196\_(+)\_596546\_596665  
rank=1 bitscore=55.5 evalue=4.0E-6 perc\_ident=92.31 perc\_conserv=94.87 perc\_gaps=0.0  
query\_cvg=100.0 subj\_cvg=100.0 alpha=92.31 beta=2 prob=0.998620934304626  
GTGAATGATCATCTTTTGAAGATGATCAACCTATCAGCAGAAATAAAGCCGCCTGATAAA  
GAGGCGGCAGATCGTTATATGTCATCTATGAATTTGATGTATCGTTTTTCGTTTGCCTGA

>AA QryID: NC\_000964\_(-)\_2316286\_2316387 HitID: NC\_018520\_(-)\_2295779\_2295880  
rank=1 bitscore=42.4 evalue=0.037 perc\_ident=100.0 perc\_conserv=100.0 perc\_gaps=0.0  
query\_cvg=100.0 subj\_cvg=100.0 alpha=100.0 beta=2 prob=0.9986209342007168  
ATGGTGAAGCAAATGACAATGCTGTTTTTGCTTGGAGCGGTTGTACATATAGTGATTA  
ATTGGTTTTGTATTAAGGAATCTCTAATAAATCTGTTTGA

>AA QryID: NC\_000964\_(-)\_1233396\_1233605 HitID: NC\_017743\_(-)\_1281503\_1281706  
rank=1 bitscore=117.0 evalue=2.0E-24 perc\_ident=92.54 perc\_conserv=92.54 perc\_gaps=0.0  
query\_cvg=97.1 subj\_cvg=100.0 alpha=60.85 beta=2 prob=0.9986209340134753  
GTGCATATGCTTGAGGCTGTTTTTTATGCCATAACCAAACGTACGTTCCATTTTATGCA  
CTAAAGAAACCGCGCCGGGATAAGCGCGGTTTCATATGTCTTAACGACAACAAAGGGGAT  
GGGAGAAATTTTTCACGGTCAAACAAAGGGTAATGTTTGTGTGATCAATTCACATC  
CTTATGATAACAAAAGATGTCGACTTTTGA

>AA QryID: NC\_000964\_(-)\_4004159\_4004287 HitID: NC\_017196\_(-)\_3867403\_3867531  
rank=1 bitscore=78.6 evalue=5.0E-13 perc\_ident=92.86 perc\_conserv=95.24 perc\_gaps=0.0  
query\_cvg=100.0 subj\_cvg=100.0 alpha=60.72 beta=4 prob=0.9986209334241773  
ATGGTAGAGGAAAGCTCCGAAAAAAGGAGCTTTCCTTTTTTAATCGGAATAGTTGGCCCA  
CGCTTCTCGTACATATGGAAAGGGGACGGAAACAGCCGATGCGGACAGGTTTTGTAAAC  
GCTTTCTAG

>AA QryID: NC\_000964\_(+) \_1691008\_1691133 HitID: NC\_017743\_(+) \_1737638\_1737763  
rank=1 bitscore=58.9 evalue=4.0E-7 perc\_ident=92.5 perc\_conserv=92.5 perc\_gaps=0.0  
query\_cvg=97.56 subj\_cvg=97.56 alpha=90.24 beta=1 prob=0.998620933343616  
TTGCATTTTCTTCAAAAAGTTTCAAAAATGCCGAAAAGAAAGGAGAAAAACAGAAATT  
CTGCTATTTTCAGGCTTATATCAAGGCGAGAAATGTAGTTCTAACAATCTAGGACTTTAT  
ACCTAG

>AA QryID: NC\_000964\_(+) \_2136231\_2136350 HitID: NC\_017196\_(+) \_2073282\_2073401  
rank=1 bitscore=60.5 evalue=1.0E-7 perc\_ident=94.87 perc\_conserv=97.44 perc\_gaps=0.0  
query\_cvg=100.0 subj\_cvg=100.0 alpha=65.05 beta=2 prob=0.998620932876155  
ATGATGAAACAAACTTCAGCATTGATTATAAAGGAATATATCGAAAAAAGAAATGTTTGA  
GGATCTGTTAGGCACTTCCTCAGAAAAACGGATAATCGGGGTGTTAATTTGAAAACCTAA

>AA QryID: NC\_000964\_(-)\_972961\_973077 HitID: NC\_017195\_(-)\_950687\_950803  
rank=1 bitscore=45.4 evalue=0.005 perc\_ident=94.74 perc\_conserv=97.37 perc\_gaps=0.0  
query\_cvg=100.0 subj\_cvg=100.0 alpha=94.74 beta=2 prob=0.998620931990654  
ATGCTTTGGTTTCTTAAAAATAAAGATACTCATACATCGTTGACAAGGCAGACTGCGACC  
GTTTCATAATAAAGAAAAATACAGAATCAGACTCGGACAGCACGGAAAAAATTGA

>AA QryID: NC\_000964\_(+) \_1105817\_1105972 HitID: NC\_017195\_(+) \_1084488\_1084643  
rank=1 bitscore=91.7 evalue=1.0E-16 perc\_ident=92.16 perc\_conserv=96.08 perc\_gaps=0.0  
query\_cvg=100.0 subj\_cvg=100.0 alpha=67.6 beta=2 prob=0.9986209318385183  
ATGCTCCTGAGTCCCGGCAAATTCCTGTGCAAAAAATTCGTTCAAATGACCTGCGTGTGC  
TTCCGTGAGAACAATGGATATTATCGTGATATTTTTTCAAAGCATGATGATAAAAGTATT  
CTGAAAAATAAACTTTACAGAAAAGGGATAGAATGA

>AA QryID: NC\_000964\_(+) \_3590381\_3590503 HitID: NC\_017196\_(+) \_3450895\_3451017  
rank=1 bitscore=51.6 evalue=6.0E-5 perc\_ident=95.0 perc\_conserv=95.0 perc\_gaps=0.0  
query\_cvg=100.0 subj\_cvg=100.0 alpha=73.41 beta=1 prob=0.9986209317179519  
ATGCTCTATTCTGAGCAAATACGACAATATTCATGCTTTTTGTATCAATCGGTAAGATCG  
ATTCATTTTCCATTTTTCACCCAAAATTGCTTTACTTTACGGCTGTCTGTTTTTATGAT  
TAA

>AA QryID: NC\_000964\_(-)\_3224699\_3224812 HitID: NC\_014976\_(-)\_1232066\_1232164  
rank=1 bitscore=56.2 evalue=3.0E-6 perc\_ident=96.88 perc\_conserv=96.88 perc\_gaps=0.0  
query\_cvg=86.49 subj\_cvg=100.0 alpha=58.87 beta=1 prob=0.9986209303677916  
TTGGAGAATCTATACATGCATTCTCCATATGAGGGAAGCTGGCCTGCCCTCGCTTATATC  
AGCTTCTTTCCAGCACCTTGCAAAATAAAACCATCTGGTATGCTGATCGGTGA

>AA QryID: NC\_000964\_(-)\_1784950\_1785096 HitID: NC\_014976\_(-)\_3995443\_3995571

rank=1 bitscore=64.3 evalue=2.0E-8 perc\_ident=92.5 perc\_conserv=97.5 perc\_gaps=0.0  
 query\_cvg=83.33 subj\_cvg=95.24 alpha=82.59 beta=1 prob=0.9986209298083941  
 TTGGATTTCTCATTTCCATGCATGTTGTAAAGCACATAGCAGCGATTGAAATGAAATTA  
 ATAAATGGAAAAGACATATGTGAAAAAGTAAAGGAGATTCAACTTGAAGGATTGCTATT  
 GGTGCTCTGGATGTGGTTCATTTATGA  
 >AA QryID: NC\_000964\_(-)\_3302765\_3303001 HitID: NC\_017743\_(-)\_3167475\_3167732  
 rank=1 bitscore=109.0 evalue=4.0E-22 perc\_ident=90.14 perc\_conserv=92.96 perc\_gaps=0.0  
 query\_cvg=91.03 subj\_cvg=83.53 alpha=61.17 beta=2 prob=0.9986209281329571  
 ATGAAATGTTTCGCTTATATAATGTACTCTGTTTTATTTAGGATGTCAAACATTATGATT  
 TGCTGGCAGGTGTGGTGCAGTGCCGAAGCTTGTCATGCAGGGTGAGTTTAGGTATCATA  
 GTTTTAACGAATGGTCTTAGAGAGCGGATCAAAACGCGAATGATATACGTTTCAGCAAAGC  
 TTGGTCGTTTCAGCACCAGGCTTTTCTTTATGGCATGGACATGGGAAAGGAGCGAATAA  
 >AA QryID: NC\_000964\_(+)\_2028845\_2028976 HitID: NC\_020244\_(+)\_2036101\_2036232  
 rank=1 bitscore=48.5 evalue=5.0E-4 perc\_ident=93.02 perc\_conserv=100.0 perc\_gaps=0.0  
 query\_cvg=100.0 subj\_cvg=100.0 alpha=96.51 beta=10 prob=0.998620926780577  
 GTGAAACCAATGAGTAAGAAAGGTATTCAAAATTCAAGTATTGAACAAATAAGAAATGAC  
 CATGAGACTGAAACAGCTTTTAAAGCAGATGATCCTAAAAAACACGGTTCCGATCCTAAA  
 AGAACGAAATAA  
 >AA QryID: NC\_000964\_(-)\_3939715\_3939843 HitID: NC\_017195\_(-)\_3741412\_3741546  
 rank=1 bitscore=61.6 evalue=6.0E-8 perc\_ident=90.24 perc\_conserv=92.68 perc\_gaps=2.44  
 query\_cvg=97.62 subj\_cvg=90.91 alpha=86.09 beta=1 prob=0.9986209260545298  
 TTGATATATATATCGGAGAAAAAAGAGAGATTAATAGTAAGAAGGAAAAAATTTTTCAT  
 GGGCAGGGTTGTTTAGCAAAATGCAGATTTTTTCCGCATGAAGAGGAAATTTTCCAAATG  
 AATTTGTAA  
 >AA QryID: NC\_000964\_(-)\_568951\_569082 HitID: NC\_017196\_(-)\_564698\_564826  
 rank=1 bitscore=60.1 evalue=2.0E-7 perc\_ident=94.74 perc\_conserv=94.74 perc\_gaps=0.0  
 query\_cvg=88.37 subj\_cvg=90.48 alpha=52.28 beta=1 prob=0.9986209216441411  
 GTGGCATACAATGTTAGAACATTTTCAGCAGTAAGTGAATGTTGTCCTAAGAAAAAACAA  
 GCATCTTACTATGCTTGTCTTTCTTCTATAGAAATGATCTTATTACGCTATGATGCTATT  
 CCTTTAGCCTGA  
 >AA QryID: NC\_000964\_(+)\_1905637\_1905774 HitID: NC\_017195\_(+)\_1887711\_1887872  
 rank=1 bitscore=74.3 evalue=1.0E-11 perc\_ident=91.3 perc\_conserv=93.48 perc\_gaps=2.17  
 query\_cvg=100.0 subj\_cvg=86.79 alpha=56.45 beta=2 prob=0.9986209198878979  
 TTGAACATTTTAAAACAGCACAAAGACGGATTCATAAACGGCTGCTGCTGAATATAAT  
 GTCCAATGCCACCTGCCTAAGAAGCAGGAGGCAGGCTGGATCAATTATGTAGCTCTGCCG  
 GAAATGATACAAACGCTAG  
 >AA QryID: NC\_000964\_(+)\_176746\_176844 HitID: NC\_014976\_(+)\_2391816\_2391914  
 rank=1 bitscore=50.1 evalue=2.0E-4 perc\_ident=93.75 perc\_conserv=96.88 perc\_gaps=0.0  
 query\_cvg=100.0 subj\_cvg=100.0 alpha=62.95 beta=1 prob=0.9986209187097611  
 ATGATGATAGGTTATTTTTTCGGAAACAGCTCGGGTTGCCAAATGAGAGAAAAAGATATT  
 ACTGTCATTAAAACGATTCTTGTTTCATCCGGATATGA  
 >AA QryID: NC\_000964\_(+)\_3658965\_3659099 HitID: NC\_017195\_(+)\_3457899\_3458018  
 rank=1 bitscore=42.4 evalue=0.065 perc\_ident=97.44 perc\_conserv=100.0 perc\_gaps=0.0  
 query\_cvg=88.64 subj\_cvg=100.0 alpha=91.9 beta=1 prob=0.9986209177564367  
 TTGGATGTAAATGGTATGTTAAGAAGTGTGAATTACGTGTTTTTCTGATAAATGTTGTT  
 AATACTCTTTTACTATTTTATATACAAGTCCTATTTGTTTTAATCATTTTCATATAAAAAA  
 GAGACAAATCTGTGA  
 >AA QryID: NC\_000964\_(+)\_2778590\_2778874 HitID: NC\_019896\_(-)\_1448108\_1448392  
 rank=1 bitscore=117.0 evalue=2.0E-24 perc\_ident=85.11 perc\_conserv=85.11 perc\_gaps=0.0  
 query\_cvg=100.0 subj\_cvg=100.0 alpha=85.11 beta=1 prob=0.9986209082451467  
 ATGTTTTCTGCCCTCTTTCTAATGCCAATGATAAGGGAATACATACAGCCTTTGCTGCTG  
 CATTGCCATCAGCCTCTGCTGTCGGAATGGATTTCCATAACCATGTTTGAAGGAATGCGG  
 CATGGACGCATAACCATGGCCAATCGACGGCAGTCTTTTTTGATAATCGTTCATCATGCC  
 ATCACCTGCCTCACAATAACGTTGATTTACTATATGCAGGCGCGCATTTTCTTGACAGCT  
 ATTTGCTAAACTTGGTCTTCTCCATTGTATAATGCATCAATAG  
 >AA QryID: NC\_000964\_(-)\_2712272\_2712382 HitID: NC\_014976\_(-)\_696136\_696237  
 rank=1 bitscore=45.1 evalue=0.005 perc\_ident=93.94 perc\_conserv=93.94 perc\_gaps=0.0  
 query\_cvg=91.67 subj\_cvg=100.0 alpha=60.6 beta=1 prob=0.9986209038509715  
 ATGGACGTTATGGGTTTAAACAAAAGATGATTTTATGGAAGGAATCGAAGTAGGCGGGGCT  
 GTTACCTTTTTTGGTTTTACGAAAGATGCTGATGTATCCTTAACGTTTTAG  
 >AA QryID: NC\_000964\_(+)\_624351\_624467 HitID: NC\_017195\_(+)\_613237\_613353

rank=1 bitscore=72.4 evalue=3.0E-11 perc\_ident=89.47 perc\_conserv=94.74 perc\_gaps=0.0  
 query\_cvg=100.0 subj\_cvg=100.0 alpha=67.46 beta=1 prob=0.998620896929479  
 TTGCCGCCTGACAGCGGCTTTTTTATGTTTGGCTTTGCAAACAAAGGGGAATAGGACAA  
 ACTGCGGGAACGCTTTATGAGAATATCAGCGTATTTACATACCGTTTCGGGGGTATAG  
 >AA QryID: NC\_000964\_(+)\_368952\_369131 HitID: NC\_017195\_(+)\_359028\_359207  
 rank=1 bitscore=90.1 evalue=3.0E-16 perc\_ident=88.14 perc\_conserv=93.22 perc\_gaps=0.0  
 query\_cvg=100.0 subj\_cvg=100.0 alpha=61.04 beta=2 prob=0.9986208917611217  
 GTGTATACAAAAAGCATGGGTGGGTGTTTAAAAGCGTCTATGAAGGGAAGAGGTGATGAA  
 AAAAGGAATTGTCCAAGGATGAATGCCAGACGTACCAAGGAAACGCATGTGAAAGTGAAG  
 GATGCAGCAGACCCGCTCACTCATCTATGCCAATACCGGAAGAAATGGTCAAGAGGCATGA  
 >AA QryID: NC\_000964\_(+)\_101329\_101448 HitID: NC\_017743\_(+)\_101400\_101504  
 rank=1 bitscore=40.8 evalue=0.11 perc\_ident=94.12 perc\_conserv=97.06 perc\_gaps=0.0  
 query\_cvg=87.18 subj\_cvg=100.0 alpha=88.08 beta=1 prob=0.9986208814681174  
 TTGTGGACCGGGAATAATGAAGGATAGAGCGAGAAAGTTGAAAATTCTCGAG  
 AAACGGCTTATAGTAAGATTAAAGTCAAATATAGTCAAAGTCAGTAAAGGAGGGGGTTGA  
 >AA QryID: NC\_000964\_(+)\_1354131\_1354277 HitID: NC\_014479\_(+)\_1312684\_1312830  
 rank=1 bitscore=77.4 evalue=2.0E-12 perc\_ident=85.42 perc\_conserv=87.5 perc\_gaps=0.0  
 query\_cvg=100.0 subj\_cvg=100.0 alpha=85.42 beta=1 prob=0.9986208753837462  
 ATGCTGATTGGGAGAAATGGCTTAAACCCTTTGCAAATATGGGTGATTGGTATGGAATG  
 GCCTCGGCAAAAATATTGTCTTTGTTTATTAATAGTTTATTCATATTTGCTTGTTACACT  
 ATTTCAAAGTTAGACAAAAAGGAGTGA  
 >AA QryID: NC\_000964\_(+)\_859573\_859704 HitID: NC\_016047\_(+)\_971801\_971932  
 rank=1 bitscore=67.8 evalue=8.0E-10 perc\_ident=88.37 perc\_conserv=88.37 perc\_gaps=0.0  
 query\_cvg=100.0 subj\_cvg=100.0 alpha=66.26 beta=1 prob=0.9986208665637804  
 GTGTTTCTTTATGATTATTGTAAGAGGAGAAAAATGAGTATTATGTAGCAGTATCAAAC  
 GACAAATACTGGGCATTTATGCTTATCGTTTGTCACAATCGCGGAATGTTTATTTTAGTG  
 TGGCTGGGGTAG  
 >AA QryID: NC\_000964\_(-)\_1279267\_1279479 HitID: NC\_014479\_(-)\_1236388\_1236615  
 rank=1 bitscore=88.2 evalue=1.0E-15 perc\_ident=84.29 perc\_conserv=92.86 perc\_gaps=0.0  
 query\_cvg=100.0 subj\_cvg=93.33 alpha=81.48 beta=1 prob=0.998620862423736  
 TTGTTTGGAACACAGCATCTAATAGAAATGTCATGGCAAAAAACACAACCATGCAAATC  
 AAAAATCGTATAATCTCACTCAAAATCCAGCTATCAGCTATGCGCATACCATCGGTTTCT  
 CGGAGTGTTGCGCATATTGAAAAATCATGAGTATGTTTTTAGGGTTTCTTTGTTTATA  
 AAATACCATCGCTTCTCGATAGGATGACTTAA  
 >AA QryID: NC\_000964\_(-)\_339773\_339886 HitID: NC\_017195\_(-)\_329737\_329850  
 rank=1 bitscore=58.9 evalue=4.0E-7 perc\_ident=89.19 perc\_conserv=91.89 perc\_gaps=0.0  
 query\_cvg=100.0 subj\_cvg=100.0 alpha=57.79 beta=1 prob=0.9986208385779176  
 TTGTACAACATTCTGCAGGTATTTAATACTTCGACGCAAAAAAGCGTTAAACCTTCC  
 GCCTTTATTGTTTTCCAGCTGACTCTTCGATGGAAGGGTCTTTTCTGTATGA  
 >AA QryID: NC\_000964\_(+)\_320729\_320887 HitID: NC\_017743\_(+)\_315054\_315212  
 rank=1 bitscore=63.9 evalue=2.0E-8 perc\_ident=84.62 perc\_conserv=86.54 perc\_gaps=0.0  
 query\_cvg=100.0 subj\_cvg=100.0 alpha=84.62 beta=1 prob=0.9986208224037367  
 GTGTTGAAAAAGCAACTTATTTTCCAGTAAAGGAGCAGGAAGTCATAAGAGGAAGGAGG  
 AATTCAATTCCAATAAAAGCGTTTTCAACTAAAGGTAGGAGAAAAATCACCCGTAAATA  
 CAATCATATAGGAGGATTACAGAGCATTAAGAAGCATAA  
 >AA QryID: NC\_000964\_(+)\_2488832\_2488933 HitID: NC\_014976\_(+)\_467989\_468081  
 rank=1 bitscore=32.3 evalue=39.0 perc\_ident=100.0 perc\_conserv=100.0 perc\_gaps=0.0  
 query\_cvg=90.91 subj\_cvg=100.0 alpha=95.45 beta=2 prob=0.9986207807474023  
 GTGAAAATCATGTCTCAAAAAGTATGAAAAGCGTTTTGATCGTGATTTTGGGAGTTTTT  
 ATTCTTTCAACTGTACTCTCAGGAATCGTCATGTTTCTATAA  
 >AA QryID: NC\_000964\_(+)\_644379\_644477 HitID: NC\_016047\_(+)\_773329\_773442  
 rank=1 bitscore=48.9 evalue=4.0E-4 perc\_ident=83.87 perc\_conserv=96.77 perc\_gaps=0.0  
 query\_cvg=96.88 subj\_cvg=83.78 alpha=75.76 beta=2 prob=0.9986207510444594  
 TTGATGGATAAAGGGCTGAGGTCACTGTTAATAAAGTGGATAAATTCAGAATATTTGTG  
 GATAGTGTGTATAAAGCGCTTACTTTGTTTATTTATTAG  
 >AA QryID: NC\_000964\_(-)\_211194\_211340 HitID: NC\_016047\_(-)\_323597\_323752  
 rank=1 bitscore=78.2 evalue=1.0E-12 perc\_ident=86.05 perc\_conserv=95.35 perc\_gaps=0.0  
 query\_cvg=89.58 subj\_cvg=84.31 alpha=51.58 beta=1 prob=0.9986207312506677  
 ATGAAACTGAAGACAGCATATCAATTTTGTTCACCGCTTAAATTTATCAGCAAGCTTTAC  
 GAAGTTGGTCTCATAATCATGTCACTAAACACTTGGGGAAACCCGGCAGGTGACAAGGAT  
 GTTTTCAAATATTGTTCAAGTGACTAA  
 >AA QryID: NC\_000964\_(+)\_202126\_202266 HitID: NC\_019896\_(-)\_3841518\_3841658

rank=1 bitscore=68.6 evalue=8.0E-10 perc\_ident=80.43 perc\_conserv=82.61 perc\_gaps=0.0  
 query\_cvg=100.0 subj\_cvg=100.0 alpha=80.43 beta=2 prob=0.9986205276058345  
 ATGTCCAAAAGCGAAAGAACGTCTACAGTGGAAAAATGGATTAAAGAAAGTTGATGGTACA  
 GGACCCGACTATCGATCGACCATGGCTATAGATTTAAGATGTTTCCTCATTAGATCGGT  
 AATCAGGTTAAAAGGCATTAA  
 >AA QryID: NC\_000964\_(-)\_2778608\_2778766 HitID: NC\_017196\_(-)\_2535893\_2536051  
 rank=1 bitscore=61.6 evalue=1.0E-7 perc\_ident=75.0 perc\_conserv=75.0 perc\_gaps=0.0  
 query\_cvg=100.0 subj\_cvg=100.0 alpha=50.13 beta=11 prob=0.998619891337275  
 ATGATGAACGATTATCAAAAAAGACTGCCGTCGATTGGCCATGGTTATGCGTCCATGCCG  
 CATTCTTCAAACATGGTTATGGAAATCCATTCCGACAGCAGAGGCTGATGGCAATGCAG  
 CAGCAAAGGCTGTATGTATTCCTTATCATTGGCATTAG  
 >AA QryID: NC\_000964\_(-)\_3700806\_3700913 HitID: NC\_017743\_(-)\_3577969\_3578076  
 rank=1 bitscore=47.0 evalue=0.002 perc\_ident=80.0 perc\_conserv=85.71 perc\_gaps=0.0  
 query\_cvg=100.0 subj\_cvg=100.0 alpha=80.0 beta=1 prob=0.9986198741288563  
 ATGCATATTAAATACAAACAGCAGGGTGTGACTATACGTCCAGAAGGATATCAGGAGAAA  
 AATGAAAGCGCATTCTCTTTGATTTTTTAAAAAGTGATAAGGTATAA  
 >AA QryID: NC\_000964\_(-)\_2720273\_2720428 HitID: NC\_017196\_(-)\_2483127\_2483300  
 rank=1 bitscore=70.9 evalue=2.0E-10 perc\_ident=80.7 perc\_conserv=80.7 perc\_gaps=15.79  
 query\_cvg=94.12 subj\_cvg=100.0 alpha=57.44 beta=2 prob=0.9986197125541261  
 TTGAAGACTATGGGAACCACTCTCCATACGGAAAAAGATGATTATTTACATCATTACAGAG  
 TTGATTTTAGGTTCTTTTGAAGTTATAATGTTATATATACTGTTTTTGTATTCAATA  
 AATATTTACATCGGAGGTGTACGCCTTACTAGGTAA  
 >AA QryID: NC\_000964\_(+)\_613445\_613618 HitID: NC\_017195\_(+)\_602396\_602569  
 rank=1 bitscore=81.6 evalue=1.0E-13 perc\_ident=78.95 perc\_conserv=78.95 perc\_gaps=0.0  
 query\_cvg=100.0 subj\_cvg=100.0 alpha=57.21 beta=1 prob=0.9986186629100899  
 ATGATGCTGGTCACGATGATTCCCTGCATCATTCCCATTTATAGGTGTTTCGGAATATCAC  
 TTTGCCGCGCCGTGCTCAAGCGGCTTTCACAGGCTGAAAGTTATGATACAATATACAAAT  
 GTTTCACAGCTTCAATCCATAGTTGGAGCTGACATCCATTATATAAGGGACTAG  
 >AA QryID: NC\_000964\_(-)\_3036354\_3036473 HitID: NC\_017196\_(-)\_2799485\_2799613  
 rank=1 bitscore=43.1 evalue=0.02 perc\_ident=80.95 perc\_conserv=88.1 perc\_gaps=7.14  
 query\_cvg=100.0 subj\_cvg=100.0 alpha=87.18 beta=14 prob=0.9986182538635218  
 GTGAATCTCATGTGTACGATTGCAAAAGAACGGCTGCAGCGGGATCATTGGGAGCAGCAG  
 GCGCAAGATAGTGTGGCCAGCAAGAGGCGAAAGCCGATAAAAAACCCCGACCGCATAG  
 >AA QryID: NC\_000964\_(+)\_3035508\_3035609 HitID: NC\_017188\_(+)\_2777773\_2777868  
 rank=1 bitscore=42.4 evalue=0.037 perc\_ident=80.65 perc\_conserv=80.65 perc\_gaps=0.0  
 query\_cvg=93.94 subj\_cvg=100.0 alpha=49.31 beta=3 prob=0.9986181668375754  
 ATGGTTGACTTCAAAACAAATAAATTATATAATGACCTTTGTGTGAAATATTGCAGCCTT  
 TTTGTTGAGCTTCTATGTTTTCATTTTGTTCCTTATCAATAA  
 >AA QryID: NC\_000964\_(+)\_2354700\_2354846 HitID: NC\_016047\_(+)\_2321228\_2321389  
 rank=1 bitscore=67.8 evalue=1.0E-9 perc\_ident=79.55 perc\_conserv=84.09 perc\_gaps=0.0  
 query\_cvg=91.67 subj\_cvg=83.02 alpha=45.44 beta=1 prob=0.9986176194203762  
 ATGATCTGCCGTTTTCTTCTGCAAGCCAAAAACCTTCCGTTACAACGAGAAGGATTCTT  
 CACTTTCTAAAGTTCGGCGAGTTTCATCCCTCTGTCCAGTCCTTTTTTGGATCAAGGCA  
 GACTGCTGCAATGTCTATCTATTTTAA  
 >AA QryID: NC\_000964\_(+)\_3532107\_3532298 HitID: NC\_014976\_(+)\_1545107\_1545298  
 rank=1 bitscore=83.6 evalue=3.0E-14 perc\_ident=69.84 perc\_conserv=69.84 perc\_gaps=0.0  
 query\_cvg=100.0 subj\_cvg=100.0 alpha=49.87 beta=11 prob=0.9986166309230213  
 ATGGGGAAAACAGGATACATTGGTGCTGCCATTGTTGTGGCAGCTTGTATCATTATTTTG  
 TCGGCCGTGGTATGTTTACGGGACACAGTCTATTACCAGCCTATGCGCTGGACTGGCATC  
 ATACTGTTTTTCGCGGGAATTGTGATGGTTCCCGCATACTCAGCAAAAAGAAAACCCGGA  
 AAAGAGAAGTAA  
 >AA QryID: NC\_000964\_(+)\_2953633\_2953791 HitID: NC\_014976\_(+)\_962150\_962308  
 rank=1 bitscore=57.8 evalue=2.0E-6 perc\_ident=78.85 perc\_conserv=84.62 perc\_gaps=0.0  
 query\_cvg=100.0 subj\_cvg=100.0 alpha=53.85 beta=1 prob=0.9986160125258199  
 ATGAGCGCAAGAGAGAAAAAGAAAATCTTTTCATCCCCACCCAGAATACAAAGAACCAACA  
 ATTCCCCCTTATTACGCAATTTACAACAAAACACCGACAGGAAGAAATGTAAAACAAAG  
 TTAATCTCTGACCGATATAAGGAGCAGAAGGGAGCCTGA  
 >AA QryID: NC\_000964\_(-)\_3546001\_3546183 HitID: NC\_017195\_(-)\_3340288\_3340434  
 rank=1 bitscore=69.7 evalue=5.0E-10 perc\_ident=79.17 perc\_conserv=85.42 perc\_gaps=0.0  
 query\_cvg=80.0 subj\_cvg=100.0 alpha=47.53 beta=1 prob=0.9986143846121802  
 TTGGTCAATAAAGGTCAAACAAAAGCTGGCCTGATATGCAAAGTCGTCTCTTTTTCCCA  
 TTTTCCCCAAAATACAGGGGTTCAAACCATCGTATGTCAGATTGCCAATTAAGATGCTT



TGCTATTTAAAAACGGCCTCTCGAAATAGAGGGTTGTTATTTGAAAGGAATTATCGTA  
TAA

>AA QryID: NC\_000964\_(-)\_376767\_376928 HitID: NC\_017195\_(-)\_368303\_368470  
rank=1 bitscore=57.0 eval=3.0E-6 perc\_ident=78.26 perc\_cons=86.96 perc\_gaps=0.0  
query\_cvg=86.79 subj\_cvg=83.64 alpha=35.49 beta=1 prob=0.9986062364326919

GTGCAACGCATTTTCTTTCTTATCCATATCAGCTTTAATTCTTATGAACTAACAGCC  
GAAATAGCCCAAAGTACTACACTTAAAAAGCAGTGCTTCCAATCAAAAAACAGATGGCCG  
CTATTAAAGCAGGCTGCCGTCAGTCAGCATTGCGGCGTTTAA

>AA QryID: NC\_000964\_(+)\_2070028\_2070129 HitID: NC\_017196\_(+)\_2008261\_2008374  
rank=1 bitscore=38.5 eval=0.52 perc\_ident=76.67 perc\_cons=83.33 perc\_gaps=0.0  
query\_cvg=90.91 subj\_cvg=81.08 alpha=40.97 beta=1 prob=0.9985865057400618

TTGATGGGCAACTTTTTGTACAGAGCCGGGTGTTGGTAGCACCTCGGTCTTTTTTATTT  
TATGCATTTCTCATTAAAGAAATGCACTGTAATGTATTGTAA

>AA QryID: NC\_000964\_(+)\_3404546\_3404695 HitID: NC\_017195\_(+)\_3202093\_3202242  
rank=1 bitscore=67.0 eval=3.0E-9 perc\_ident=73.47 perc\_cons=73.47 perc\_gaps=0.0  
query\_cvg=100.0 subj\_cvg=100.0 alpha=41.88 beta=3 prob=0.9985779518352697

GTGCTGATCAAACAGGCAGGTATCCTGGCTCTTGGCGCTTGGCCAATTACAGTGGCGGGA  
CCGCACCGGCTTTTACCGGTTTCCCTTTTAAAGCCGGCTGTTGTTACGGACCGGCACCTA  
TTTGACATTTCGTATCCGTTTTTCGGAGTAA

>AA QryID: NC\_000964\_(-)\_1493344\_1493469 HitID: NC\_017196\_(-)\_1498851\_1498964  
rank=1 bitscore=36.6 eval=2.0 perc\_ident=72.97 perc\_cons=72.97 perc\_gaps=0.0  
query\_cvg=90.24 subj\_cvg=100.0 alpha=69.41 beta=2 prob=0.9985726548289531

GTGTTTTTTAGCGTATCAATCAAACAAATCATCAATTCCTATACCCAAATTTGGAAAAAT  
AAGCTTCTTACTCTTCTCCATTGCTTTTTGCACAAATAAAAAACCTGATGAGGTCAGGT  
TTTTAG

>AA QryID: NC\_000964\_(+)\_1560268\_1560381 HitID: NC\_017195\_(+)\_1534750\_1534863  
rank=1 bitscore=43.1 eval=0.022 perc\_ident=67.57 perc\_cons=67.57 perc\_gaps=0.0  
query\_cvg=100.0 subj\_cvg=100.0 alpha=67.57 beta=7 prob=0.9985627004945132

ATGACAAGTAAATGCCGCTTGACCTCTTGTTAATCAGGCGGCTTTACTTTTATAC  
ATAGATGGCATTTTGAGTAAAAAACTCATAATTTAAGAGAAGAGGAAATGTAA

>AA QryID: NC\_000964\_(-)\_2778456\_2778617 HitID: NC\_020244\_(-)\_2589962\_2590096  
rank=1 bitscore=46.2 eval=0.005 perc\_ident=68.18 perc\_cons=68.18 perc\_gaps=0.0  
query\_cvg=83.02 subj\_cvg=100.0 alpha=62.39 beta=3 prob=0.9982244917373558

TTGGCATTAGAAAGAGGGGCAGAAAACATTATGTTTTCTGCTTTTTTTTCGGAAAAAAATG  
AAAAAGTTTAGTTCTATTGAAACATTTTCAATACATTGCCGTCTAGTTGGTACCTTCCT  
TCACTTTTAGAAATGAAGATGATGTTTATTTTTTAAAGATAA

>AA QryID: NC\_000964\_(-)\_1190234\_1190407 HitID: NC\_017195\_(-)\_1163316\_1163468  
rank=1 bitscore=68.6 eval=9.0E-10 perc\_ident=100.0 perc\_cons=100.0 perc\_gaps=0.0  
query\_cvg=87.72 subj\_cvg=100.0 alpha=68.19 beta=54 prob=0.9982178299233269

ATGGAAGGGGGCAGTCTCAAATGGGTAAACGAAGCAAATCCAGAAGGTTTATTACAGCAG  
GGTAAAGACTCCATCGGGCTACACGCCGCAAGATTTCCATATCGGTCTACTTTAGAAGAA  
GCTCACCAGCATGCCGCGGCACGAGACTCGGCTGAAAGGCAGTATGAATATTA

>AA QryID: NC\_000964\_(-)\_527912\_528025 HitID: NC\_017743\_(-)\_524747\_524860  
rank=1 bitscore=54.7 eval=7.0E-6 perc\_ident=100.0 perc\_cons=100.0 perc\_gaps=0.0  
query\_cvg=100.0 subj\_cvg=100.0 alpha=100.0 beta=38 prob=0.9981739581084974

ATGCCAAATTGGCTTAAAAAGCAGATGCAAAAAGCGTTTCCTTGAAAAAGATAATTACCA  
ATTAACTGCTGAATCAATGCTGGTATTTCTATAGAAAAAACTGCTCGTAA

>AA QryID: NC\_000964\_(-)\_1357602\_1357796 HitID: NC\_017743\_(-)\_1406480\_1406656  
rank=1 bitscore=57.4 eval=2.0E-6 perc\_ident=58.62 perc\_cons=63.79 perc\_gaps=0.0  
query\_cvg=90.62 subj\_cvg=100.0 alpha=58.78 beta=9 prob=0.9974362691541365

TTGCTAGGAGGCATGAACATGAAACCGTGGGACTGGGTATGATCTGCGCAGGATTGGCT  
TTTCTTTTGCTGAGCTTTCTTCTCTGAATCGACGTTGACGTGGGGAATTGTATTGGGT  
ACGAGTATTCTATTAAACATAACTGGTACGGCTCTAATCATGCGTTTCTTAAAGCCCCC  
CAATATAACAGCTGA

>AA QryID: NC\_000964\_(-)\_1900640\_1900813 HitID: NC\_016047\_(-)\_2001986\_2002159  
rank=1 bitscore=60.5 eval=3.0E-7 perc\_ident=61.4 perc\_cons=64.91 perc\_gaps=0.0  
query\_cvg=100.0 subj\_cvg=100.0 alpha=61.4 beta=4 prob=0.9973763100094993

ATGTATATAAGTATTATAATTTTAGCATCCATGCTTTTATGGGGGGCAGTTATCCACGAG  
CTAAGTAAACCTTCAAAAAAGCAAAGCACCAGAAAAATTGTTTCTTTGACATCTTTAGGT  
TCTTTATCGACTTTAGTTATTACTATTTCACTTTTTCAAACTTCCCTTTTTAA

>AA QryID: NC\_000964\_(-)\_154695\_154865 HitID: NC\_017196\_(-)\_154905\_155075

rank=1 bitscore=54.3 evalue=2.0E-5 perc\_ident=64.29 perc\_conserv=66.07 perc\_gaps=3.57  
 query\_cvg=100.0 subj\_cvg=96.43 alpha=42.82 beta=1 prob=0.996996814779757  
 TTGAATAAGAATGAAATCTACCATGATTATTACAAAGAGACCGTTTATAAACAAACAATT  
 TGCTTAACCCCGTCAAGCGTCCATTTCAGTTGTTATTTTATGCGGGACTGCCACGTTTTA  
 TTGAAAGAAAAAAGCTCCCAACCCAAGGTCGAGAGCTTTTTGAAAACGTAA  
 >AA QryID: NC\_000964\_(-)\_2333095\_2333223 HitID: NC\_017195\_(-)\_2178191\_2178319  
 rank=1 bitscore=40.0 evalue=0.2 perc\_ident=61.9 perc\_conserv=61.9 perc\_gaps=0.0  
 query\_cvg=100.0 subj\_cvg=100.0 alpha=61.9 beta=5 prob=0.9969076357241591  
 ATGACGTTAGTTATTTTTAAAGGGAGAGTTGGTATGTATAAGGGTGTTTTTTACTTGTTT  
 TTTGTTGTGTTATTTTTGATTGCTTTTGTGTTTTCAAACCTTTAAAGACAGCTTAATTGCA  
 CACTTTTAA  
 >AA QryID: NC\_000964\_(+)\_3941890\_3942006 HitID: NC\_020244\_(+)\_3783248\_3783364  
 rank=1 bitscore=38.5 evalue=0.55 perc\_ident=63.16 perc\_conserv=63.16 perc\_gaps=0.0  
 query\_cvg=100.0 subj\_cvg=100.0 alpha=63.16 beta=2 prob=0.9968169810001837  
 TTGTACAGGCTTTTCATACTATTGCTATACAGCCATGAACAGCATAAAATGAACGTTATT  
 ACAGTTATCACCATATGGCGGGATTGTGACTGGGCAGGCAGGCAAGACCCAATGA  
 >AA QryID: NC\_000964\_(-)\_2779220\_2779336 HitID: NC\_014639\_(-)\_2196832\_2196957  
 rank=1 bitscore=38.5 evalue=0.54 perc\_ident=55.0 perc\_conserv=67.5 perc\_gaps=7.5  
 query\_cvg=97.37 subj\_cvg=97.56 alpha=27.98 beta=1 prob=0.9952296816234919  
 ATGACAATGAGACAACGACGTCAACCTGTACGTGATACACATGTAAAAGTTCATGGTTTA  
 TTCAGCCTGTGGAAGAGTTTCGTGTCCTTCCTTAACCGATGCTTATCGCACGCATTAA  
 >AA QryID: NC\_000964\_(+)\_2002370\_2002504 HitID: NC\_017743\_(+)\_2054792\_2054908  
 rank=1 bitscore=37.0 evalue=2.8 perc\_ident=60.53 perc\_conserv=60.53 perc\_gaps=0.0  
 query\_cvg=86.36 subj\_cvg=100.0 alpha=56.4 beta=1 prob=0.9928896050011202  
 TTGAAATCGTTTTTAAACATGCCCTCATTTTTTGACAAAAACAGGATATGTAACATGTTA  
 TTATTCATCACTGCACTTATGAAACCCTTCCCGATTCTTCTAATTTTACACATCTTTTTA  
 GCTTATGAAGAATAA  
 >AA QryID: NC\_000964\_(+)\_320906\_320998 HitID: NC\_017188\_(+)\_269903\_270013  
 rank=1 bitscore=33.5 evalue=17.0 perc\_ident=63.33 perc\_conserv=80.0 perc\_gaps=0.0  
 query\_cvg=100.0 subj\_cvg=83.33 alpha=58.06 beta=1 prob=0.991956862581278  
 ATGGATGTTTATAAAGAAATGGTACAGAATAAAAGAGAATATGCTGTTTGTGTGGGAAGT  
 TACATAAATGTTACGGTAATAAAGATTGCTTAA  
 >AA QryID: NC\_000964\_(+)\_1252611\_1252727 HitID: NC\_014976\_(+)\_3463518\_3463634  
 rank=1 bitscore=30.0 evalue=212.0 perc\_ident=57.89 perc\_conserv=57.89 perc\_gaps=0.0  
 query\_cvg=100.0 subj\_cvg=100.0 alpha=57.89 beta=1 prob=0.947301527621885  
 ATGAATCAGCATCATAAACCTTCCCAAAAATCTCCATATACAGATTCATCGTATCAATCA  
 AAAAAGATAAAAAAAGAAAGGCTGCGGGTGC GGAAATAAAAAGAAAAAGCCTCAATAG

• ***Caulobacter crescentus* CB15 uid57891**

**No vsORFs**

**sORFs**

>AA QryID: NC\_002696\_(+)\_1948167\_1948394 HitID: NC\_011916\_(+)\_1974143\_1974370  
 rank=1 bitscore=122.0 evalue=4.0E-26 perc\_ident=100.0 perc\_conserv=100.0 perc\_gaps=0.0  
 query\_cvg=100.0 subj\_cvg=100.0 alpha=83.14 beta=40 prob=0.9999618469937064  
 ATGACCGCATTCTCTCCCGCCACCATGCCCGCCACGGACGACGACAAGCGCGCCGTCGAA  
 CGGCTCGCCGAGGCCTCCACCGCCTGAACGACGCCGTGCGTCGCGCCATCGCCGCCGGC  
 TATTCGGTGGAGCTGGTGCACCTCGCGCCATCATGACGGCGCAGGCAACTGGGGCGAT  
 CAGATCGTCCCGACCGTTCGTGAAAAAGGCGCCGAAAAGAGCGCCTAG  
 >AA QryID: NC\_002696\_(+)\_513706\_513996 HitID: NC\_011916\_(+)\_539769\_540026  
 rank=1 bitscore=82.4 evalue=8.0E-14 perc\_ident=65.88 perc\_conserv=65.88 perc\_gaps=0.0  
 query\_cvg=88.54 subj\_cvg=100.0 alpha=39.88 beta=34 prob=0.9999618432096337  
 ATGCGCGCGCCCATTCGCGGGCATGGATTACCGATGCACAGCCAGAACCCTTTCCTCGAC  
 GAATTCGCCAAGCTGACCCAGGCGGCCATGGGCATCGCCAGACGGCCGGCGAGGAGGCC  
 AAGACCGCGATGCGGGCCCGAGGCGGACCGTCTGGCGGCCGAGTTCGACCTGATCCGTCGC  
 GACGATTTGAGGCCCTGAAGGCCGAGGTCGCGGGCGCTGCGCGAGGAAGTGGCGGCCTTG  
 AAGGCGGCCAAGAAGGCGCCCGCCAAGAAAACCGCGAGTTCAGGCGAATAG  
 >AA QryID: NC\_002696\_(-)\_1205285\_1205545 HitID: NC\_011916\_(-)\_1231262\_1231522

rank=1 bitscore=171.0 evalue=9.0E-41 perc\_ident=100.0 perc\_conserv=100.0 perc\_gaps=0.0  
query\_cvg=100.0 subj\_cvg=100.0 alpha=72.57 beta=1 prob=0.9999617690031452  
GTGGTTAAGAAGTGTTCACAGCGCGTTAACCATAAATATTTCTTTGTTTTACACCGCG  
GTCGAGATCCCAACCATTATGGTTGAAGGCGTATTGAATTGGCACATTTCTTGCTTTGTC  
GAATACGCGCACGGCGGCCCGCGCCCGCGGTTCTTAGAACTTTGTTACCGACCTTAAA  
ATGACGTAACTCTAAGTTTTAGGCGTCCGTTACCCCTTCATTCCACCCACCCCTCCCC  
AAACGGCGCGAAGCAGGCTAG

>AA QryID: NC\_002696\_(+)\_1722766\_1723059 HitID: NC\_011916\_(+)\_1748742\_1749035  
rank=1 bitscore=153.0 evalue=4.0E-35 perc\_ident=88.66 perc\_conserv=88.66 perc\_gaps=0.0  
query\_cvg=100.0 subj\_cvg=100.0 alpha=67.01 beta=1 prob=0.9999617651431557  
GTGGCCGAGTACATCCTGCTGATGCATGACGACGGCGGGAGGAGCGGGCGGCCGACTGG  
GAGCCCTATCTGGATGGCTGGCCGGCGCGGCGGCTGCGCGGCGAGCCCATGGGC  
GAAGCGCCTGTTACCGGAAGGTCCGCGCTCCAGGGCGGTCTCCGGGCATGTGACGGGC  
TTTGTCGCATTGTGCGCGAAAGCCTCGAAGACGCGGCGCGTTGTCTGGCCGGCAACCCG  
GTCTATGAGGCCGGCGGTACGGTGGAATTCGCCTGTTGCCCGAGGACGTTTGA

>AA QryID: NC\_002696\_(+)\_3458076\_3458342 HitID: NC\_011916\_(+)\_3484065\_3484331  
rank=1 bitscore=152.0 evalue=6.0E-35 perc\_ident=100.0 perc\_conserv=100.0 perc\_gaps=0.0  
query\_cvg=100.0 subj\_cvg=100.0 alpha=82.75 beta=2 prob=0.999961755029225  
GTGTGCCTTTTCGGCCGGGGCGCTTCAGGTCCTTGCTTTGTTTTTCGGCTTTTCAAGGCT  
CGGCTAAGAGACCCGATAAACACGAACTCGCCGGAGCGCGGGAAGCACACCGGCGGGTT  
CAAGATCCCTTCGGACCCGAAAGCCCGGAAGGAACGCAAGCTCATCAGGACGGACGCGAA  
CGACCGCCTCGAAAAAGAGCGCGGTATTTACTCGCGAAGTGGTCCAGCGTCAACCGCCTG  
TTCCCGCGTCGGTTAACGCCCTCTTAA

>AA QryID: NC\_002696\_(-)\_3624608\_3624829 HitID: NC\_011916\_(-)\_3650597\_3650818  
rank=1 bitscore=130.0 evalue=2.0E-28 perc\_ident=100.0 perc\_conserv=100.0 perc\_gaps=0.0  
query\_cvg=100.0 subj\_cvg=100.0 alpha=76.66 beta=3 prob=0.9999617437688421  
TTGCGCGGGCGGCCCGCGGTGTGAAGCTTCCTCCACGGCAGCCTGGGCAAAAGATCCG  
GGCGCCGACGAGGAAACGAGAGAGATGACGCCCAAGACGTTGTCAGCCTGGCCCCGCCG  
CGCGGCTTGCTGTTGATGCTGGCCCTGGCCTTACCAGCATGATGGCCTGTTTCTGGACG  
CATGGGGCGGACCTGGAAGCCGAGCTCGTCCGGCGCGACTGA

>AA QryID: NC\_002696\_(+)\_2969289\_2969528 HitID: NC\_011916\_(+)\_2995269\_2995508  
rank=1 bitscore=135.0 evalue=8.0E-30 perc\_ident=100.0 perc\_conserv=100.0 perc\_gaps=0.0  
query\_cvg=100.0 subj\_cvg=100.0 alpha=70.77 beta=3 prob=0.999961743542296  
ATGGTTCAGCTTTCACGTGAGGGGACGACGACGCTCCGCACCTGCGGCGGACGAATGGGT  
CCCGCGCATGAAGCGCGGGATGACGGCGGAGTGGAGTTTTGGAATGGGGGGAGGTTCGGAC  
GCCCCCTCCGTCTCGCTGCGTATCCGCAGCGATCCACCTCCCCCGCAAGCGGGGCAGGAG  
GGCTGCGGCTTCCTCCTCACCCGACGCGGGGGAGGTGGCGTGCGGCAAAGCCGCGTGA

>AA QryID: NC\_002696\_(+)\_1186395\_1186613 HitID: NC\_011916\_(+)\_1212372\_1212590  
rank=1 bitscore=120.0 evalue=2.0E-25 perc\_ident=100.0 perc\_conserv=100.0 perc\_gaps=0.0  
query\_cvg=100.0 subj\_cvg=100.0 alpha=69.34 beta=6 prob=0.9999617434197152  
GTGCGCGTCACCTGGACCGATAGCGCATCGCGCGATCTGAGGTTCGCGTACGCCTGGATT  
GCGCAGGATCGGCCTACGGCGGCGCTTAAGCAGGTTTCGAGAATTTGGGAGTTTCGCGCA  
AAGCTGTCCGACTTTCCCAATCTTGGAAGGCCAGGACGTGCCCTGGTACGCGTAACTGG  
TCGTGCCGGGCGGCCCTTATTGTCGCTTACAGAGTGA

>AA QryID: NC\_002696\_(+)\_2910412\_2910666 HitID: NC\_011916\_(+)\_2936392\_2936646  
rank=1 bitscore=142.0 evalue=4.0E-32 perc\_ident=100.0 perc\_conserv=100.0 perc\_gaps=0.0  
query\_cvg=100.0 subj\_cvg=100.0 alpha=72.62 beta=1 prob=0.9999617432595498  
TTGCTCACATGGCGCACCGCCACGCTCGTTGATCGGCCCACTGGCCACCTATACGTCGCC  
GACAGGTTGGCGGGGTTTTTCGGCCGACCGCGCGCGTCTGTGAGCGCTGGTGCGCGCCTC  
TGCGCCTTGCTGCTTGACCAGGCGGCGGCACAAGCCGAACCAAGCCCTGGGCAAGGTC  
GCGGCTCGCACAAACCAAAACATCACCCGTTTAACTATCGCTTGAATTGACTTCCTCC  
ACTCGCGGTTTCATAG

>AA QryID: NC\_002696\_(-)\_197070\_197267 HitID: NC\_011916\_(-)\_197070\_197267  
rank=1 bitscore=102.0 evalue=5.0E-20 perc\_ident=100.0 perc\_conserv=100.0 perc\_gaps=0.0  
query\_cvg=100.0 subj\_cvg=100.0 alpha=100.0 beta=1 prob=0.9999617404367486  
TTGGAGGGTTCCATCCAAACCAGACGGCTCCAAGCCCCGGCCTGCCGGGGATCATAGGC  
TATCGGCCGGGCATGGGTGGCGCGCGCGCACAGACCCATGACCCGGCGCGGCCGATCGGC  
GAGCACGCCCATCGAGTCAGCCACCGCTGCGTGACTCCCAATCCCGATGCGACGAAAAC  
GGCCTCGCATCGCTTAG

>AA QryID: NC\_002696\_(-)\_2654495\_2654698 HitID: NC\_011916\_(-)\_2680477\_2680680  
rank=1 bitscore=79.7 evalue=4.0E-13 perc\_ident=100.0 perc\_conserv=100.0 perc\_gaps=0.0  
query\_cvg=100.0 subj\_cvg=100.0 alpha=100.0 beta=3 prob=0.9999617378372871

TTGCTGACCGAGTGCGCAACAGATGAGCCGCCTCGAAGGACGCATAGTGCTAGCCCTGCG  
 GAGATCCGACCTCCCCGGCGAATGCCGGGTCCAGATCGAACCCACCGACTATCGTCGGC  
 TTAGCGCGGAGCGTTGGCGCGTCATCCCCAGCCGCTCCGGATGAATCTGGACCCCGGCGT  
 TCGCCGGGGAGGTGCGGGGTGTTAG  
 >AA QryID: NC\_002696\_(+)\_2302707\_2302961 HitID: NC\_011916\_(+)\_2328683\_2328937  
 rank=1 bitscore=106.0 eval=5.0E-21 perc\_ident=100.0 perc\_cons=100.0 perc\_gaps=0.0  
 query\_cvg=100.0 subj\_cvg=100.0 alpha=82.83 beta=2 prob=0.9999617369337677  
 TTGTCTACAATCCGGACGCTGTCCGGCGCTCCGCTTCCCTTCCGAACCTTCAGCGGA  
 GCGCGCGTGAAGTGGTGGTGGCGTGCTCAGAGCGCCCCCTCCGTCTCGTCGCGTATCCGC  
 GCCGATCCACCTCCCCCGCGCGCGGGGAGGATGACAGGCCGACCTCCTCACCCGTGCAG  
 CGGGGGAGGTGGCGCGATGCGAAGCATCGCGACGGAGGGGGCGCTCATCAAATCCAGACA  
 GGAGCCTCCCCCTGA  
 >AA QryID: NC\_002696\_(-)\_2230563\_2230784 HitID: NC\_011916\_(-)\_2256539\_2256760  
 rank=1 bitscore=140.0 eval=2.0E-31 perc\_ident=100.0 perc\_cons=100.0 perc\_gaps=0.0  
 query\_cvg=100.0 subj\_cvg=100.0 alpha=60.02 beta=1 prob=0.9999617365985606  
 TTGCGCGCAAAGATTGTGATCTGGCCTCTGAAAGGGGCGTCAGATGCCGTCTTGACGCGT  
 TTACGAGGGGTGCGCGCAGGTTCCGAGCGCCGGGTTTGTCTCTCGCCTGAAACATCGTGT  
 CGTGTTGCACACTCGCACATATCGAATATGTCTATTTTCAAAGCCTAGGCCGCATTGG  
 CGCGGATTGGGACACACCCCTGTGTGCTTTCTGCTGCAATAG  
 >AA QryID: NC\_002696\_(+)\_3461706\_3461933 HitID: NC\_011916\_(+)\_3487695\_3487922  
 rank=1 bitscore=88.6 eval=1.0E-15 perc\_ident=100.0 perc\_cons=100.0 perc\_gaps=0.0  
 query\_cvg=100.0 subj\_cvg=100.0 alpha=100.0 beta=1 prob=0.9999617356499785  
 TTGGACGGCTGGGCGGGATCAAAGACGCAAGCCGGGCGTTGTGGGTCCATGCCGAGCCTA  
 TCAAACCCGCCACCGAGGAGCGCGCCTCGAATCGCGAGGTTGAGCACGAGACCATGCGC  
 CCCGCCGCGAGGACGAAGCGCCTTGCCCGGCGACTGAGCCGCCGGGATCGGCAGACAGC  
 GTCCGCTCGCCGAAGACCCGGACGGATCCGGGCTCCAGCGAAAGCTAG  
 >AA QryID: NC\_002696\_(-)\_615970\_616203 HitID: NC\_011916\_(-)\_642000\_642233  
 rank=1 bitscore=116.0 eval=3.0E-24 perc\_ident=100.0 perc\_cons=100.0 perc\_gaps=0.0  
 query\_cvg=100.0 subj\_cvg=100.0 alpha=76.82 beta=1 prob=0.9999617348022812  
 ATGACCCGCGCATCTCTGGCCAGCCTACGGCGAGGCGCGTCGCCGAAGCGCTGGCCAGAC  
 TTGGACGCCCCGACCACCTGAACGAAACAGGAGGCGTTTCCAGTATTCGCCAACCTCTTCG  
 GAGGTTACGGCGCTGTGACCCCTGAGGCCAGCGCTGGATGGTCCCTACGGTTTGTGGATC  
 GCGCCGGGCGAGATGAACGCTATCCCGCGCGCGTCCGCGCTCAATTGACGTCTGA  
 >AA QryID: NC\_002696\_(+)\_361909\_362088 HitID: NC\_011916\_(+)\_361909\_362088  
 rank=1 bitscore=110.0 eval=1.0E-22 perc\_ident=100.0 perc\_cons=100.0 perc\_gaps=0.0  
 query\_cvg=100.0 subj\_cvg=100.0 alpha=80.65 beta=1 prob=0.9999617341487228  
 TTGGATCCCTGGGGGGCGGTGCGCGTCCACAGAAAAGCTGATCACATTGGATGTGCAT  
 GCGTCGTGGCGGCCCGCCCTCGCCCTTCGACAAGCTCAGGGTGAGGACGACTGTTGGCCTC  
 GGTTCGCACAAAATCCTATCCTGAGCTTGTGCAAGGACGAGGATTTCCAATCCGCGTGA  
 >AA QryID: NC\_002696\_(+)\_271669\_271875 HitID: NC\_011916\_(+)\_271669\_271875  
 rank=1 bitscore=112.0 eval=8.0E-23 perc\_ident=100.0 perc\_cons=100.0 perc\_gaps=0.0  
 query\_cvg=100.0 subj\_cvg=100.0 alpha=77.26 beta=1 prob=0.9999617328308107  
 GTGGCAGCTGGAGGGCGTGGCATTGGCTTTGCCGCCTTCTTCTCGTCCCCGAGAAGGAG  
 CCTCCTTACATCTCACGGCGAGACGATCGCAGGGCTGGGCAGGTCACTCAAGGACGACG  
 CTCCGCTCGCCCGCGCGCGTCCGACGGGCGTCCCTGACTGACCTGCCAGCCCT  
 GCACGCTGCAGCCTCCAAGAGATTTAA  
 >AA QryID: NC\_002696\_(+)\_1225215\_1225391 HitID: NC\_011916\_(+)\_1251192\_1251368  
 rank=1 bitscore=70.5 eval=3.0E-10 perc\_ident=100.0 perc\_cons=100.0 perc\_gaps=0.0  
 query\_cvg=100.0 subj\_cvg=100.0 alpha=100.0 beta=2 prob=0.9999617289001757  
 GTGCGCGCAGGACTCCAAAGTCGTCCTACCCCTGAGCCTGTGCAAGGGCGAGGGCGGCTC  
 CCACGATCTCATCAACACTCAACGCGAAACAGCCAAAGAAAAAGGGCCGAGGATCGCCCC  
 GGCCCTTCGTTGTTTCAGACGGTGAGCGAGCAGGCCGCCACCACCGTGAGTGTTGA  
 >AA QryID: NC\_002696\_(-)\_3408850\_3409053 HitID: NC\_011916\_(-)\_3434839\_3435042  
 rank=1 bitscore=108.0 eval=7.0E-22 perc\_ident=100.0 perc\_cons=100.0 perc\_gaps=0.0  
 query\_cvg=100.0 subj\_cvg=100.0 alpha=72.5 beta=1 prob=0.9999617249812318  
 TTGGCGTCAAACATCGCCGCCACGGTCGCGCTGGGCGTGCCCGGCGCGATGGGAGCGAGC  
 GGTTCGATCAGACGGGACAGCGTTTCCATACGGCGCTTCGTCAACGGCTTGGGGTTTGCA  
 ACTTGCTCGGCCGCCCTTGACAGAGTCGTTAAGGTGGTACCGCTCTCATTGTGCGGGCCC  
 GAGGCGGCGGGGCTTCAAGATTGA  
 >AA QryID: NC\_002696\_(-)\_489255\_489374 HitID: NC\_011916\_(-)\_515285\_515404  
 rank=1 bitscore=50.8 eval=1.0E-4 perc\_ident=100.0 perc\_cons=100.0 perc\_gaps=0.0  
 query\_cvg=100.0 subj\_cvg=100.0 alpha=100.0 beta=4 prob=0.9999617237537175

ATGCCGGGATCCAGATCGAACCCACTGACGCTTATCCTTTTCAGCGCGGACCGAGGGCGCG  
TCATCCCCAGCCGTTCTGGATGAATCTGGACCCCGGCATGCGCCGGGAGGTCTGGTATAG  
>AA QryID: NC\_002696\_(+)\_1459904\_1460059 HitID: NC\_011916\_(+)\_1485880\_1486035  
rank=1 bitscore=92.4 eval=5.0E-17 perc\_ident=100.0 perc\_cons=100.0 perc\_gaps=0.0  
query\_cvg=100.0 subj\_cvg=100.0 alpha=78.23 beta=1 prob=0.9999617148498033  
GTGTTGAAGCCGCTGCGTCATGGCGACGCGGGCGGTTTTTTCATGCGCCATGCTCCTG  
AACCATTGCGCTCAGGATCAGCTGACGCGGGTTTCATCGCCCGCAAGCACGACAAGGCG  
TTCGCCCATATAGGCCGTCTACGGATTAAGCTGA  
>AA QryID: NC\_002696\_(+)\_1024154\_1024339 HitID: NC\_011916\_(+)\_1050185\_1050370  
rank=1 bitscore=85.5 eval=8.0E-15 perc\_ident=100.0 perc\_cons=100.0 perc\_gaps=0.0  
query\_cvg=100.0 subj\_cvg=100.0 alpha=77.96 beta=2 prob=0.9999617147294557  
TTGCGTGGGGTTCTCCAGTACCCGAGGGAGAACCGCCATGGCGGCGGACGCGGCGATT  
TTTGATCAAACGGCTCCAGCGCGCGCCTTCGCCATCCTGTGTATCATGCTGGCCAG  
TTCGTCTCGCCAGCTGCGAGGCCGAACCGACGCCGATGGCGGCGCGGAGTCCGCCGCT  
TTCTAG  
>AA QryID: NC\_002696\_(-)\_2029331\_2029450 HitID: NC\_011916\_(-)\_2055307\_2055426  
rank=1 bitscore=64.3 eval=1.0E-8 perc\_ident=100.0 perc\_cons=100.0 perc\_gaps=0.0  
query\_cvg=100.0 subj\_cvg=100.0 alpha=100.0 beta=1 prob=0.999961714015798  
ATGGTCTTCTCAGCTTGGCCAGTAGCGACCGCCGCGCGGCAAGGCCTTCGCGGAGAAT  
AGACCAGACGCTCGCCATCAGTCTGGACAGCATGTTGATGCGCTCCGCCTCTTGGCCTGA  
>AA QryID: NC\_002696\_(+)\_2948881\_2948994 HitID: NC\_011916\_(+)\_2974861\_2974974  
rank=1 bitscore=62.8 eval=2.0E-8 perc\_ident=100.0 perc\_cons=100.0 perc\_gaps=0.0  
query\_cvg=100.0 subj\_cvg=100.0 alpha=100.0 beta=1 prob=0.9999617116166721  
TTGTTAGCGAGGCGCGCCAGAGCGCCTTTGTCGCCCTCAATCCGCTGTTTCGGATTTTC  
GCCTTAGTTTTCCGGAATATCGGAAATTGTCCGAAACATCGGATGAATAGGTAG  
>AA QryID: NC\_002696\_(+)\_437383\_437550 HitID: NC\_011916\_(+)\_437383\_437550  
rank=1 bitscore=62.4 eval=6.0E-8 perc\_ident=100.0 perc\_cons=100.0 perc\_gaps=0.0  
query\_cvg=100.0 subj\_cvg=100.0 alpha=100.0 beta=1 prob=0.9999617109444994  
GTGTCATCCCGGCCGCGAGCGCGCAGCGCGGAGCGCCGGGACCCAGGGGGTGACCAAGCGC  
GGCGCTCTTGCAACCCCTGGGTCCCGGGTCGGCTTCGCCGCCCGGGAGGACATGAGCTTA  
CGGGGATTGGGCGGCGTGAACGCTCGGAATTGGCGGGGGCGGGCCTAA  
>AA QryID: NC\_002696\_(+)\_2278974\_2279204 HitID: NC\_011916\_(+)\_2304950\_2305180  
rank=1 bitscore=97.1 eval=3.0E-18 perc\_ident=100.0 perc\_cons=100.0 perc\_gaps=0.0  
query\_cvg=80.26 subj\_cvg=80.26 alpha=57.44 beta=2 prob=0.9999617026454743  
ATGCGACCTCCCCGGCGAATGCCGGGGCCCGAGATCGAACCACGGACGCCAATCTGGCAA  
GCGCCGCACGATATCGGATCATCCCCAGCCGCTCCGGATGCATCTGGGCCCCGGCATTTCG  
CCGGGGAGGTCTGGTTAATTTGAAGCATCCGTCTGGGGTGAGCTTCTACCGCAATGCGTCC  
TTCGAGGCTCGCCTTCGGCTCACACCTCAGGATGAGGAAATCCGTTGCTGA  
>AA QryID: NC\_002696\_(-)\_2971285\_2971503 HitID: NC\_011916\_(-)\_2997265\_2997483  
rank=1 bitscore=102.0 eval=8.0E-20 perc\_ident=83.33 perc\_cons=83.33 perc\_gaps=0.0  
query\_cvg=100.0 subj\_cvg=100.0 alpha=83.33 beta=1 prob=0.9999616856716493  
ATGAACAAGCCTGCCAAGCCTGCGGCGGATGACGTGACGACCTCTTTGGCCGCCCGCTG  
ACGCCGGCCGAAGAGGACACATGGTTGCAACATAATCGCGAAGCCATCGGTCAACTCGTC  
GATGAGGCTTGGGCTGAGTTGAGCGTGGCGAATATGACGAACGCAGCTTCGCTGAGATC  
ATCGCGCAGGGCGTTGCAGAGCATAACGCCAAACGCTGA  
>AA QryID: NC\_002696\_(+)\_1897353\_1897460 HitID: NC\_011916\_(+)\_1923329\_1923436  
rank=1 bitscore=45.4 eval=0.004 perc\_ident=100.0 perc\_cons=100.0 perc\_gaps=0.0  
query\_cvg=100.0 subj\_cvg=100.0 alpha=100.0 beta=1 prob=0.9999616632451411  
ATGGCTTCGGCGGCGCGGTATCTAGATGCGGATGAAACCATCTCAGATGAAAGCATCGCT  
CGCCTGGCGGGCGATCGGCTGATAACCCTGCTCAACGCCCGGATTTAG  
>AA QryID: NC\_002696\_(-)\_2842412\_2842507 HitID: NC\_011916\_(-)\_2868392\_2868487  
rank=1 bitscore=40.0 eval=0.19 perc\_ident=100.0 perc\_cons=100.0 perc\_gaps=0.0  
query\_cvg=100.0 subj\_cvg=100.0 alpha=100.0 beta=1 prob=0.9999616350250295  
GTGGTCCGCTTCTGAGCGAGGCGCGGTGCGCGCGCAAGTCTTGCATGACGTTGTTTCATG  
CACAGGGAATGCGGGCGGATGGGGATGAAACGCTGA  
>AA QryID: NC\_002696\_(+)\_800330\_800452 HitID: NC\_011916\_(+)\_826360\_826482  
rank=1 bitscore=70.1 eval=2.0E-10 perc\_ident=100.0 perc\_cons=100.0 perc\_gaps=0.0  
query\_cvg=100.0 subj\_cvg=100.0 alpha=74.66 beta=1 prob=0.999961625189151  
GTGGGGGCGGACATAACAATCACCGTCATCCCGCGCTTTATGCGCGGGACCCATTTGTCC  
GCCGCAGGTGCGGTACGGCGTGAATCTCTCACGTGGAAGCTGAACCATGGGTCCCGCGCA  
TAA  
>AA QryID: NC\_002696\_(-)\_2071359\_2071451 HitID: NC\_011916\_(-)\_2097335\_2097427

rank=1 bitscore=35.4 evalue=4.0 perc\_ident=100.0 perc\_conserv=100.0 perc\_gaps=0.0  
 query\_cvg=100.0 subj\_cvg=100.0 alpha=100.0 beta=1 prob=0.9999616014408779  
 ATGAAGGGCGCGCGCGTCGCCGACCGTCGCACCGTCAGCGCGGTTGCGAAGGGTCAGGTG  
 CCAAAGGCGGTTCGGGTGCGGCGCAGCCCATTA  
 >AA QryID: NC\_002696\_(-)\_3734233\_3734358 HitID: NC\_011916\_(-)\_3760215\_3760340  
 rank=1 bitscore=61.2 evalue=8.0E-8 perc\_ident=100.0 perc\_conserv=100.0 perc\_gaps=0.0  
 query\_cvg=100.0 subj\_cvg=100.0 alpha=76.76 beta=1 prob=0.9999615753338398  
 TTGAGAGGGGCGGCGCGGGTGATCGCGCCGCCCTTTTCACGTTTCCGGAACCTTGATGGC  
 GCAGGATCCATTACGGGCTGCGCGCTTTCGCCGCCGTGACGGGTGGCTGCAAGGGCGTA  
 GGCTGA  
 >AA QryID: NC\_002696\_(+)\_3014045\_3014341 HitID: NC\_011916\_(+)\_3040024\_3040320  
 rank=1 bitscore=105.0 evalue=7.0E-21 perc\_ident=71.43 perc\_conserv=71.43 perc\_gaps=0.0  
 query\_cvg=100.0 subj\_cvg=100.0 alpha=54.59 beta=6 prob=0.9999615752342418  
 GTGGAAGGCGGACCATGCTCCCTCTCCCAAAGGGAGAGGGTTGGGGAGAGGGGTTACGGT  
 GTCCGACGGAGCGCCGGCACGCCGTCAAACCTCGTAACCCCTCTCCCTCCCACCGCTTCG  
 CGGCGGGCCCCTCCCTCTCCCTTTGGAAGAGGGATTCTGTTTGGCGCCAAGGTCCGCAAC  
 GGGCCAAAAGCCGCCTATAGCCTCCCTCCCAAACCCGACCTTCCCGGCGACACGTCAGT  
 GCGTCTTCGAGGCTCGCCTACGGCTCACACCGCAGGATGAGGAGGCCCGTTGCTGA  
 >AA QryID: NC\_002696\_(-)\_3000810\_3000905 HitID: NC\_011916\_(-)\_3026790\_3026885  
 rank=1 bitscore=41.6 evalue=0.065 perc\_ident=100.0 perc\_conserv=100.0 perc\_gaps=0.0  
 query\_cvg=100.0 subj\_cvg=100.0 alpha=78.38 beta=2 prob=0.9999614282297874  
 ATGCCGTTTCGGCTGGCCCTCCACCGCCGTTTCGGCGGTCCCCCTCCCCCGATGGGGGAGG  
 AGAGGTGTTCCGCGGGGGCAAATCTCCCGCAGTTAG  
 >AA QryID: NC\_002696\_(-)\_1693007\_1693252 HitID: NC\_011916\_(-)\_1718983\_1719228  
 rank=1 bitscore=108.0 evalue=8.0E-22 perc\_ident=79.01 perc\_conserv=79.01 perc\_gaps=0.0  
 query\_cvg=100.0 subj\_cvg=100.0 alpha=38.2 beta=2 prob=0.9999604613127009  
 ATGACAGGCCTTCGCAAACGCTCGGTGAACCTTGTTGGCCACGCCACCTCCCTGGCGCTG  
 GAGCCAGAGTTCTGGGCGGTCTGGAAGCCGCGGCGGCGGCGGCGGCCAGAGTCTCGCG  
 GCCTTGATCCAAAGCGTAGACCGGGAACGGGGCGAGCGGCCGCTGGCTTCTGCGTGCCG  
 GTCTTCGCGCTTGAGCACGTCGCTCAAACCACAGCGTCGGGGCGAGCCACGCGCGCTATC  
 GACTGA  
 >AA QryID: NC\_002696\_(-)\_105028\_105237 HitID: NC\_011916\_(-)\_105028\_105237  
 rank=1 bitscore=85.1 evalue=1.0E-14 perc\_ident=72.46 perc\_conserv=72.46 perc\_gaps=0.0  
 query\_cvg=100.0 subj\_cvg=100.0 alpha=72.46 beta=1 prob=0.9999598250740378  
 ATGGGCCTGGATATCCGTGTCATGACCCTGGAGGCCAAGGAGCGCTCCAGCTTCGCCCAT  
 CGGGCCGTGGCCGCTCTGGGCCTGGTCAGCCTGGGCCTGGCCTGGGCGGTGCTGCTGGTC  
 CCGTGTCATGCTCTGGCTCGCCGTCACCCACCTGGGACGCCGCATGGAGCCCCCTCGCTCGC  
 CGTCCCGCGCCTGAAGGCCTCAAAAGCTGA  
 >AA QryID: NC\_002696\_(-)\_1006121\_1006255 HitID: NC\_011916\_(-)\_1032152\_1032286  
 rank=1 bitscore=54.7 evalue=1.0E-5 perc\_ident=77.27 perc\_conserv=77.27 perc\_gaps=0.0  
 query\_cvg=100.0 subj\_cvg=100.0 alpha=77.27 beta=1 prob=0.9999499406838015  
 TTGCGGCCCGCCGCCATCTTGTTAAACAAATTTTCGCGGCGCGGCGCCGACCGATGGT  
 CGCGGCGGCGGCCAGATCGGCCCGGAGCTTTGCGTCGTCCTCGCCCTTCGACAGGCTCAG  
 GGTGAGGACGAATGA  
 >AA QryID: NC\_002696\_(-)\_437556\_437741 HitID: NC\_011916\_(-)\_437556\_437741  
 rank=1 bitscore=53.1 evalue=4.0E-5 perc\_ident=77.05 perc\_conserv=77.05 perc\_gaps=0.0  
 query\_cvg=100.0 subj\_cvg=100.0 alpha=77.05 beta=1 prob=0.9999457675436461  
 GTGAACCCAGCAAGCTCAGCCCCGACCGTTCGAGTATCCCCCTCGAACCTCATCCCGCT  
 CAACCGCCCCCGCCGCCGCAAATGGTCGCTGGCCACGCGCCCTTTCCTCGCGACGAGGT  
 GGAACAGTATGGGGCGGGTTGAAACGCCGGGGACAAATCGGCGCGTAAAGCGACAAGC  
 GGTTGA  
 >AA QryID: NC\_002696\_(-)\_1924064\_1924282 HitID: NC\_011916\_(-)\_1950040\_1950258  
 rank=1 bitscore=67.0 evalue=3.0E-9 perc\_ident=69.44 perc\_conserv=69.44 perc\_gaps=0.0  
 query\_cvg=100.0 subj\_cvg=100.0 alpha=69.44 beta=1 prob=0.9999042172874794  
 ATGATTCCACCTCGTCGCGAGGAAAGGGCGCATGGCCAGCGACCATTTGCGGCGGCGGGG  
 GGCGGTTCGAGCGGGGACAGGTTTCGAGGGGGGTACTCGGACGGTCCGGGGATCTGGTTGCT  
 GGCCAGACCCGCCCGCCGTCGGCGTGGTCGGGGGAAAGGGTTTCGTCCTCTTCGATCGC  
 CGGGCGCTGCCGGAACGGAAGCGCCCGGGTCCCGGTAA  
 >AA QryID: NC\_002696\_(-)\_3590465\_3590704 HitID: NC\_011916\_(-)\_3616454\_3616693  
 rank=1 bitscore=77.8 evalue=2.0E-12 perc\_ident=64.56 perc\_conserv=64.56 perc\_gaps=0.0  
 query\_cvg=100.0 subj\_cvg=100.0 alpha=64.56 beta=1 prob=0.9998668056129876  
 ATGGCGTGGCCAGAGGCAGATTGTCGTTGCGAAGCCGAGGGCGGCTTCGACCCGTTGCG

GACCTTGCGCCAAACAGAATCCCTCTTCCAAAGGGAGAGGGAGGGGCCCCGCCGCGAAGC  
 GGTGGGAGGGAGAGGGGTTACGAGGTTAGACGGCGTGCCGGCGCTCCGTCGGGCGCCGTA  
 ACCCCTCTCCCAACCTCTCCCTTTGGGAGAGGGAGCATGGTCCGCCTTCCACCCTTAG  
 >AA QryID: NC\_002696\_(-)\_866642\_866887 HitID: NC\_011916\_(-)\_892673\_892915  
 rank=1 bitscore=72.4 evalue=9.0E-11 perc\_ident=65.0 perc\_conserv=65.0 perc\_gaps=0.0  
 query\_cvg=98.77 subj\_cvg=100.0 alpha=64.6 beta=1 prob=0.9998101434041744  
 TTGATGGACGATCGCCGGGCTCTGGAGCGACGGCAAGTCCGGGTTTGCTACCGGTCAAA  
 AAAATCCGCGCACCGTCGCAGGTGACGATGCGCGGGGGAGGACGTCGCGCGACCTCGGGG  
 AGAGGCGCCGCGCGAAGCGCTCGAAGGCCGGTGAGGCCCTCCTCGCGCCACCGAACCGGT  
 AAATGGCCCCGATCCGGCAGTGACCGAAACTATAATCATATAATTCAGACCAGCAAGCGG  
 ATTTGA  
 >AA QryID: NC\_002696\_(+)\_3657309\_3657452 HitID: NC\_011916\_(+)\_3683299\_3683442  
 rank=1 bitscore=47.4 evalue=0.002 perc\_ident=72.34 perc\_conserv=72.34 perc\_gaps=0.0  
 query\_cvg=100.0 subj\_cvg=100.0 alpha=72.34 beta=1 prob=0.9997815486620503  
 ATGGCCTACGTCTCTATGATCAGGCTGTTACGCGACCGCAATTCGACCGCAACGCCGC  
 CTCGCTGGGGCCGGCTTCTGGCGCTCGCCGCCACGGTCGGGCTTTGGATTGGCCTGATC  
 GCAGCGGTTCCGGCGATTCTCTGA  
 >AA QryID: NC\_002696\_(+)\_437761\_437883 HitID: NC\_011916\_(+)\_437761\_437883  
 rank=1 bitscore=44.7 evalue=0.009 perc\_ident=70.0 perc\_conserv=70.0 perc\_gaps=0.0  
 query\_cvg=100.0 subj\_cvg=100.0 alpha=70.0 beta=1 prob=0.999597645527617  
 TTGAGGGCAAAAGGATGTGTCTTAGCCTGTATTGGCTCGTCTCCTCGATCGCTGGGGCT  
 TCTGGAAACAGAAGCGCCAGGTCCCGTAAGGCCTGAACAGGGCCACCTGACGGGACGC  
 TGA  
 >AA QryID: NC\_002696\_(+)\_3356854\_3356985 HitID: NC\_011916\_(+)\_3382840\_3382971  
 rank=1 bitscore=50.4 evalue=1.0E-4 perc\_ident=69.77 perc\_conserv=69.77 perc\_gaps=0.0  
 query\_cvg=100.0 subj\_cvg=100.0 alpha=51.0 beta=1 prob=0.9994488282327081  
 GTGTGGGCTCGAAGAGACGACGGAGGGGGAAAGGGGAGGGTCGGCAGGACTTCCCCCTCC  
 GGCGCTTCGCGCCACCTCCCCCGCCAGGGGGAGGATTTGGGCTGCCCCCTTGCTATTAT  
 ACGATCGTATAG  
 >AA QryID: NC\_002696\_(-)\_3330675\_3330869 HitID: NC\_011916\_(-)\_3356661\_3356855  
 rank=1 bitscore=52.4 evalue=8.0E-5 perc\_ident=56.25 perc\_conserv=56.25 perc\_gaps=0.0  
 query\_cvg=100.0 subj\_cvg=100.0 alpha=56.25 beta=4 prob=0.9993021338254658  
 TTGAGGGTGGTTTTTCGCACCATGCTCCCTCTCCCAAGGGAGAGGGTTGGGGAGAGGGGT  
 TACGGTGTCCGACGGAGCGCCGGCACGCCGTCAAACCTCGTAACCCCTCTCCCTCCACC  
 GCTTCGCGGGCGGGCCCCTCCCTCTCCCTTTGGAAGAGGGATTCTGTTTGGCGCCAATGTC  
 CGCCAGGGTCGTGA  
 >AA QryID: NC\_002696\_(-)\_2371097\_2371249 HitID: NC\_011916\_(-)\_2397073\_2397225  
 rank=1 bitscore=44.3 evalue=0.019 perc\_ident=60.0 perc\_conserv=60.0 perc\_gaps=0.0  
 query\_cvg=100.0 subj\_cvg=100.0 alpha=60.0 beta=1 prob=0.9991577409006407  
 GTGTTAGGGGAATGGCAACTAGCGCGGGTGTTCCTCTCCGACGAGGGACAGGAGGGGT  
 ACCATGAAAGCCGGCTATGCCGCCTTGGGCGTGGGGATGTTGTTGCTTGGACTAGTCGGC  
 GGTCTGCTGCTGGCGCTGCGTCCGATCGGATAG  
 >AA QryID: NC\_002696\_(-)\_2290920\_2291141 HitID: NC\_011916\_(-)\_2316896\_2317117  
 rank=1 bitscore=56.2 evalue=5.0E-6 perc\_ident=54.79 perc\_conserv=54.79 perc\_gaps=0.0  
 query\_cvg=100.0 subj\_cvg=100.0 alpha=54.79 beta=1 prob=0.9991553305741938  
 GTGGCCGGGACGCTATTCGAAGCGGCGTATCGCCTTCGAGGCGCGTATTCGCCGCCGG  
 ATTCGCGCCCTGCCGCGGCTTCCGCGCAGCCTCGAGGACACACAGGCCCTGTCTGGCC  
 CTGATTCGCGCTGCCGTACTGGGGGCGGTGGACGACAAGCGGACGTCCCGCAGCAGGCGA  
 CGTCGCTGCGCACCGGCGCCTGTTACCGTTAGGCGTGTGA  
 >AA QryID: NC\_002696\_(+)\_841545\_841664 HitID: NC\_011916\_(+)\_867576\_867695  
 rank=1 bitscore=36.6 evalue=2.2 perc\_ident=64.1 perc\_conserv=64.1 perc\_gaps=0.0  
 query\_cvg=100.0 subj\_cvg=100.0 alpha=64.1 beta=3 prob=0.9990356384695004  
 ATGTGGTACTTCACCTGGATCCTAGGCCTCGGCCTGGCCGTCGCCTTCGGCGTGCTCAAC  
 GGCATGTGGTACGAGTTCAGCCTGTCCGACGAGGGCGATGAAGGCCTGGACGAGGCCTGA  
 >AA QryID: NC\_002696\_(-)\_772223\_772354 HitID: NC\_011916\_(-)\_798253\_798384  
 rank=1 bitscore=32.7 evalue=33.0 perc\_ident=65.12 perc\_conserv=65.12 perc\_gaps=0.0  
 query\_cvg=100.0 subj\_cvg=100.0 alpha=65.12 beta=1 prob=0.9984835750201871  
 GTGTGCGCGGCTCGGCTGGCCCCCTCCACCGCCGTTTCGGCGGTCCCCCTCCCCAGAGGGG  
 GAGGAGAAAGACGCACAGAACCCCGCTCCCGCCGTCGGAGAAATCCTTTCTCCCGCCGC  
 CCCACCCGTAA  
 >AA QryID: NC\_002696\_(+)\_1056506\_1056748 HitID: NC\_011916\_(+)\_1082537\_1082725

rank=1 bitscore=38.9 evalue=1.1 perc\_ident=42.5 perc\_conserv=42.5 perc\_gaps=22.5  
query\_cvg=100.0 subj\_cvg=100.0 alpha=48.67 beta=3 prob=0.993633932435128  
GTGGTTTTTCGCACCATGCTCCCTCTCCCAAAGGGAGAGGGTTGGGGAGAGGGGTTACGGT  
GTCCGACGGAGCGCCGGCACGCCGTCAAACCTCGTAACCCCTCTCCCTCCCACCGCTTCG  
CGGCGGGCCCCCTCCCTCTCCCTTTGGAATAACCCCTCTCCCTCCCACCGCTTCGCGGCGG  
GCCCCCTCCCTCTCCCTTTGGAAGAGGGATTCTGTTTGCGCCAATGTCCGCCAGGGTCG  
TGA

• *Escherichia coli* K12 substr MG

**vsORFs**

>AA QryID: NC\_000913\_(-)\_3150129\_3150215 HitID: NC\_020163\_(-)\_3905743\_3905829  
rank=1 bitscore=99.0 evalue=2.0E-19 perc\_ident=100.0 perc\_conserv=100.0 perc\_gaps=0.0  
query\_cvg=100.0 subj\_cvg=100.0 alpha=52.73 beta=3 prob=0.9987535491415732  
ATGAATATTCGCGGGCGCATCTGAAGAATTGGCATAAAGCAGAAAATTTTCGCAAATGG  
CGTGCTGGTGACTTTTTTACTGCGTAA  
>AA QryID: NC\_000913\_(+)\_2854932\_2855018 HitID: NC\_017663\_(+)\_3089823\_3089909  
rank=1 bitscore=95.2 evalue=3.0E-18 perc\_ident=100.0 perc\_conserv=100.0 perc\_gaps=0.0  
query\_cvg=100.0 subj\_cvg=100.0 alpha=50.0 beta=1 prob=0.9987509021163812  
TTGCTTCATAAGCATCACGCAAAAGCTGCAAAACAGCATCTTCCCGGAACCAGCATCAA  
GAACTCGCCGTTGCTTCTTCCCTGA  
>AA QryID: NC\_000913\_(+)\_1553743\_1553832 HitID: NC\_011750\_(+)\_1832861\_1832950  
rank=1 bitscore=92.7 evalue=2.0E-17 perc\_ident=96.55 perc\_conserv=96.55 perc\_gaps=0.0  
query\_cvg=100.0 subj\_cvg=100.0 alpha=58.48 beta=4 prob=0.9987493133241968  
TTGCTTTACCGCCAGGGCGTCGGCCTCAAGTATAAAGCAGATAAAAACAAAACACCATT  
GCGCAGGCAATGGTGTTTAATCGTCATTGA  
>AA QryID: NC\_000913\_(+)\_2989805\_2989894 HitID: NC\_017663\_(+)\_3216955\_3217044  
rank=1 bitscore=95.2 evalue=3.0E-18 perc\_ident=100.0 perc\_conserv=100.0 perc\_gaps=0.0  
query\_cvg=100.0 subj\_cvg=100.0 alpha=41.53 beta=1 prob=0.9987480423837592  
TTGCTGGTTATAGTGCAGTTAACCATAAACCAGCACCTCTTATGTTTTCTTAAATCAG  
CATCTTAAACAGTTAAGAGCATACTATAA  
>AA QryID: NC\_000913\_(-)\_4372284\_4372367 HitID: NC\_017663\_(-)\_4688173\_4688256  
rank=1 bitscore=90.6 evalue=8.0E-17 perc\_ident=100.0 perc\_conserv=100.0 perc\_gaps=0.0  
query\_cvg=100.0 subj\_cvg=100.0 alpha=61.48 beta=3 prob=0.9987477250374495  
GTGAGTACGGCTATTTATGTTATTTTAACAATACTACTACCAAGCCCATTATCTGGCT  
TATAAATTAATAATTATTTAA  
>AA QryID: NC\_000913\_(-)\_2334699\_2334779 HitID: NC\_011741\_(-)\_2387843\_2387923  
rank=1 bitscore=91.4 evalue=4.0E-17 perc\_ident=100.0 perc\_conserv=100.0 perc\_gaps=0.0  
query\_cvg=100.0 subj\_cvg=100.0 alpha=48.29 beta=1 prob=0.9987449188307742  
TTGTTTGAATTGAAAAGTCCAGGCTGCAAAGTCTGGGCTTTGTCGTATTAGGGCACGGT  
AAAGTTTGGCTGTGCCCGTAA  
>AA QryID: NC\_000913\_(+)\_1480983\_1481057 HitID: NC\_011750\_(+)\_1799895\_1799969  
rank=1 bitscore=85.9 evalue=2.0E-15 perc\_ident=100.0 perc\_conserv=100.0 perc\_gaps=0.0  
query\_cvg=100.0 subj\_cvg=100.0 alpha=65.28 beta=1 prob=0.9987434770809678  
ATGTTTGAATTTATTGAACAACGCATAGAAAGCCGCGATGTGGTACTCTATATCTATCAT  
TTAAAAGAAAATTAA  
>AA QryID: NC\_000913\_(-)\_2493548\_2493622 HitID: NC\_011748\_(-)\_2727904\_2727978  
rank=1 bitscore=84.6 evalue=5.0E-15 perc\_ident=100.0 perc\_conserv=100.0 perc\_gaps=0.0  
query\_cvg=100.0 subj\_cvg=100.0 alpha=58.14 beta=3 prob=0.9987300248562967  
ATGTCGACAGCGGTACACTCAATTGGTTGGGCCATCATGTACGACAATGGTTCCTGTAA  
GAGTGTAAGACTAG  
>AA QryID: NC\_000913\_(+)\_921963\_922037 HitID: NC\_011750\_(-)\_2334605\_2334679  
rank=1 bitscore=80.8 evalue=7.0E-14 perc\_ident=100.0 perc\_conserv=100.0 perc\_gaps=0.0  
query\_cvg=100.0 subj\_cvg=100.0 alpha=62.98 beta=1 prob=0.998724685206511  
ATGAATCAAAAATTTGAAGCAGTTAACGCTATTGACAGGAATGTGACAGATGTCGCTGAT  
GCCAACGATAGATGA  
>AA QryID: NC\_000913\_(-)\_3182615\_3182689 HitID: NC\_011741\_(-)\_3267419\_3267493  
rank=1 bitscore=80.8 evalue=7.0E-14 perc\_ident=100.0 perc\_conserv=100.0 perc\_gaps=0.0  
query\_cvg=100.0 subj\_cvg=100.0 alpha=46.5 beta=1 prob=0.998693520421577  
TTGAAAGCCCGCGAGCGCTTTGGGTGCGAACTCAAAGGACAGCAGATCCGGTGTAATTCC



GGGGCCGACGGTTAG

>AA QryID: NC\_000913\_(+)\_1800879\_1800950 HitID: NC\_011741\_(+)\_1846895\_1846966  
rank=1 bitscore=76.1 evalue=2.0E-12 perc\_ident=100.0 perc\_conserv=100.0 perc\_gaps=0.0  
query\_cvg=100.0 subj\_cvg=100.0 alpha=55.53 beta=1 prob=0.9986708278352675  
GTGCGTCTGAAAGGTTTACTGCGAGCGGATTTACAGCAGCATAAACTGAATCCAGCAAAG  
TTCGTTGCGTGA

>AA QryID: NC\_000913\_(-)\_4499791\_4499853 HitID: NC\_011750\_(-)\_4953920\_4953982  
rank=1 bitscore=71.9 evalue=2.0E-11 perc\_ident=100.0 perc\_conserv=100.0 perc\_gaps=0.0  
query\_cvg=100.0 subj\_cvg=100.0 alpha=51.43 beta=1 prob=0.9985807409085907  
GTGTATATGAACGATTGCACTCTGACGATGGTTGATTTATTTGGTTGCGTAGGGGCTAGC  
TAG

>AA QryID: NC\_000913\_(+)\_2901921\_2901998 HitID: NC\_002655\_(+)\_3691310\_3691387  
rank=1 bitscore=65.1 evalue=4.0E-9 perc\_ident=80.0 perc\_conserv=80.0 perc\_gaps=0.0  
query\_cvg=100.0 subj\_cvg=100.0 alpha=47.5 beta=2 prob=0.9984231878034715  
GTGAACCTCTCTGGCATGGAGAACTATTTTGAACATGAGGTGTTACGTGGATATGTTGCT  
TATTACAAGTACTGCTAA

>AA QryID: NC\_000913\_(-)\_4529979\_4530035 HitID: NC\_020163\_(-)\_553108\_553164  
rank=1 bitscore=64.3 evalue=4.0E-9 perc\_ident=100.0 perc\_conserv=100.0 perc\_gaps=0.0  
query\_cvg=100.0 subj\_cvg=100.0 alpha=54.98 beta=1 prob=0.9983830437671237  
ATGTTTTCTTACATTATGCTGGGAACCAACGACCTGCCACGCGCCATTACATTCTAA

>AA QryID: NC\_000913\_(-)\_3921709\_3921756 HitID: NC\_017663\_(-)\_4233077\_4233124  
rank=1 bitscore=53.2 evalue=8.0E-6 perc\_ident=100.0 perc\_conserv=100.0 perc\_gaps=0.0  
query\_cvg=100.0 subj\_cvg=100.0 alpha=41.88 beta=1 prob=0.9978171318512199  
ATGCCTGGTAAGCACCCGCTTACCAGGCAACGCATCAAGAACAGGTAA

## sORFs

>AA QryID: NC\_000913\_(-)\_3656917\_3657213 HitID: NC\_017625\_(+)\_224591\_224869  
rank=1 bitscore=174.0 evalue=1.0E-41 perc\_ident=100.0 perc\_conserv=100.0 perc\_gaps=0.0  
query\_cvg=93.88 subj\_cvg=100.0 alpha=72.24 beta=10 prob=0.9980195598050714  
TTGCGCGCGAGGAGAGATATGAGGGATTTACAGACCAGCGGCATAGTGGGGTTGTCAGCC  
AGTAAGGTGGGATACAGGCACAGTGATCGACATGGTGAGGTCAACGACAAAAAAATGTT  
GCCGTTCTGCCAACAGTTCTGCCAGCATTCGGGCAACGAAGGGTTCTACTGGTGGATAC  
ACATACCAGGGGAATAAAGTCGTTTTAGCCTCTCCTTTAGTAATCACCGGGGGTAATGAA  
ATCAGCATCTGCATCCCTCGTCATGCCAGCCATCAATTTCAAGTTGCTTATGTCCTGA

>AA QryID: NC\_000913\_(+)\_2404903\_2405157 HitID: NC\_012947\_(-)\_1445517\_1445771  
rank=1 bitscore=149.0 evalue=6.0E-34 perc\_ident=97.62 perc\_conserv=97.62 perc\_gaps=0.0  
query\_cvg=100.0 subj\_cvg=100.0 alpha=71.65 beta=3 prob=0.9980195597616466  
ATGACATGCGCGTGTTTGTATAAATGTAAATGTGAGTCCTTGTTCCACTCTCGTGCAGCA  
TCGCTGGTCATACGCGAACACGTACCAACAGCAATGGTGAGGCGGCATCAAGAGCAGGGA  
TCCGTCATTTATCCGAGCATTTTACCCCAAAAACCTTTTATTTATAAGGGTCATTGCGAA  
TTATCTGATGCAAAGTTATGTTATGTTAGGCAAAGTAATCTTCTATTATTAATAAGCACA  
TCAAACCTTTTTGA

>AA QryID: NC\_000913\_(+)\_3656960\_3657253 HitID: NC\_011415\_(+)\_3904079\_3904372  
rank=1 bitscore=165.0 evalue=9.0E-39 perc\_ident=98.97 perc\_conserv=98.97 perc\_gaps=0.0  
query\_cvg=100.0 subj\_cvg=100.0 alpha=78.98 beta=10 prob=0.9980195597560617  
ATGCAGATGCTGATTTTATTACCCCGGTGATTACTAAAGGAGAGGCTAAAACGACTTTA  
TTCCCTGTTATGTGTATCCACCAGTAGAACCCTTCGTTGCCCGAATGCTGGCAGGAACT  
GTTGGCAGAACGGCAACATTTTTTTTGTCTGTTGACCTACCATGTCGATCACTGTGCCTG  
TATCCACCTTACTGGCTGACAACCCCACTATGCCGCTGGTCTGTAAATCCCTCATATCT  
CTCCTCGCGCGCAATTTAAAGAACCCTTATTTCTCAAGAATTTTCAGGGACTAA

>AA QryID: NC\_000913\_(-)\_2055643\_2055939 HitID: NC\_007946\_(-)\_2109296\_2109583  
rank=1 bitscore=149.0 evalue=4.0E-34 perc\_ident=87.37 perc\_conserv=87.37  
perc\_gaps=1.05 query\_cvg=95.92 subj\_cvg=100.0 alpha=58.11 beta=7  
prob=0.9980195597431551

GTGCGCTTAATCGAGTCTCACGCTTCAGTGAGCAAATTTGCCCTCCCCAACAGACATCAC  
GATTCGCAAGGTCAAAAACCTCTGTTCCATGAAGTACCGTACAAAGATAAAGAGAAAAATG  
CCTTATGCGGGATGTCGCTATCGCGTCTTTATCGGGAAACTATGCGTAATTGCCACTTTG  
CCTTCTGTAATCAGAAAAAGAAGAACTGGAATTTTAATAAATATTATTTCTCTGGGAACG  
GGGGGGTATAATCAATATGACGAGTTGAATATTATTTTTTATAAGAATTATATGA

>AA QryID: NC\_000913\_(-)\_2459041\_2459292 HitID: NC\_017651\_(-)\_2680311\_2680562

rank=1 bitscore=152.0 evalue=5.0E-35 perc\_ident=97.59 perc\_conserv=98.8 perc\_gaps=0.0  
query\_cvg=100.0 subj\_cvg=100.0 alpha=68.8 beta=6 prob=0.9980195597362511  
ATGTTACGTGCTGTAAACAGGAGCGCGAAGTGTAGGGTCTGAGGTACATCTTAGAAATCAG  
ACCAGTGGCGAGAGTATAGGTCGGACCAGCTGGAATGTTGCAAGTATGTTTCTATCTTTT  
TTCAAATATGATCTAAGAAACGCGATCCAGCTGGCAAAATTTGGAGGTGGCGCACTCATG  
GATTCGGGTGAATTTTGTTTTAGATCATTTTAAAGTGTGATTCGGTCACTTATCCGATT  
TTGCAGAAATTA

>AA QryID: NC\_000913\_(-)\_3077362\_3077613 HitID: NC\_017626\_(-)\_3356105\_3356356  
rank=1 bitscore=151.0 evalue=1.0E-34 perc\_ident=100.0 perc\_conserv=100.0 perc\_gaps=0.0  
query\_cvg=100.0 subj\_cvg=100.0 alpha=72.21 beta=5 prob=0.9980195597346901  
ATGTCCGTTTTCGGACAAGCAATAGATAAGGCGTGTGTAGATCACAATATTTATATGC  
AATAAATCAATTATGTAATATGCATCAGATATGCGTATTGACATTTGTTGTTATATC  
TATAACTCAATGTTATATAAGAAATTAATAATTCATCTGTTTTCAAAACACCGTTTCCCT  
GCTCAATTGCTTTCATTAAACCGCACGAGTATTTTATTTTACCGCCGGACGGTACCCTA  
AAAATAAAATAA

>AA QryID: NC\_000913\_(-)\_3319807\_3320031 HitID: NC\_017626\_(-)\_3690621\_3690845  
rank=1 bitscore=134.0 evalue=2.0E-29 perc\_ident=95.95 perc\_conserv=95.95 perc\_gaps=0.0  
query\_cvg=100.0 subj\_cvg=100.0 alpha=68.47 beta=1 prob=0.9980195594948527  
TTGTCAGGTATCTGTATCTCGTCCAGTTGCTTTACTCGTAGCTGGTACCTTGAAACGATG  
GTGCCGGTACGCCTTAGTTATAAATTTTCCCTTCTACTGACATAATTGGCACTTTATTG  
TGTCAACTCCAGTTCCGGTACGAATACGGATATGTTTACTTCTCGATAAACCATCCTGCT  
CCTGTCAGTATAACGACTGATGGCTACGTTCTGCGTAATGTTTAG

>AA QryID: NC\_000913\_(+)\_2040945\_2041187 HitID: NC\_013941\_(+)\_2437248\_2437490  
rank=1 bitscore=138.0 evalue=1.0E-30 perc\_ident=93.75 perc\_conserv=96.25 perc\_gaps=0.0  
query\_cvg=100.0 subj\_cvg=100.0 alpha=93.75 beta=3 prob=0.9980195594945888  
GTGAACCATGGACATCAACGCGTCATAAATGTTTACGCAAGTGCACAATGCACCCTTTCC  
ACTATCAACAAGGAGGAGCAGAACTGTGTAAATCGTACAATGGTAAGACTTATCAAAAA  
TACAGGTTAATTTTGGTATTTAAACCTTTTTTACTTGTTAGTATGATACAAAGGCTTTCA  
AAAAAGCTGCGAAATTCACAACCTCTTGAAATTATGGACTTTGTCCCGCGGCTTTAATC  
TGA

>AA QryID: NC\_000913\_(-)\_2033476\_2033712 HitID: NC\_013008\_(-)\_2566583\_2566786  
rank=1 bitscore=127.0 evalue=1.0E-27 perc\_ident=94.03 perc\_conserv=95.52 perc\_gaps=0.0  
query\_cvg=85.9 subj\_cvg=100.0 alpha=65.75 beta=3 prob=0.9980195592618971  
GTGTTGAATATTATTCACGCCAAATTTTCTTATTGAGCAACGTCGTCGCAAGTGGCTTC  
AATGATTTTAGACCATTATCAGAGGTACGGGGTGGCGGGGAGAGATTTAGTGCTGTGGAA  
TATTGTGGTGCTGATGAATATTTATATCCCGGATTGGTAGAGAAAAAGCTTATTTTCATGC  
ACTATTTTGCAAATATTTCTATATGGGAAGCGTGTGTTACGGATTAATTCATAA

>AA QryID: NC\_000913\_(-)\_2288233\_2288490 HitID: NC\_011741\_(-)\_2349336\_2349593  
rank=1 bitscore=145.0 evalue=6.0E-33 perc\_ident=98.82 perc\_conserv=98.82 perc\_gaps=0.0  
query\_cvg=100.0 subj\_cvg=100.0 alpha=78.46 beta=9 prob=0.9980195585945825  
ATGTTTGAGCGTAGCGTTGGTAACGCTACCAGGCGCGTGAATGTTACCCCATTTTATGTA  
TGGACATGTAGTGAAAACCTACAACCTTGTCTGTTTCGCTTTGGCATCATTTTCATTATAAAG  
ACGGAATTTTGCATCAGCTTCTCATCAAGAAAAACAATAAAAAATCAATCACAACTT  
GTGCATTTCTTTAAACAGTTTTTAAAAACTGACTCCGGGTATGGAGCTATGGGTATTTTC  
TGACCCAATGCTTTTAA

>AA QryID: NC\_000913\_(-)\_4518447\_4518638 HitID: NC\_011751\_(-)\_5058584\_5058775  
rank=1 bitscore=125.0 evalue=5.0E-27 perc\_ident=100.0 perc\_conserv=100.0 perc\_gaps=0.0  
query\_cvg=100.0 subj\_cvg=100.0 alpha=76.03 beta=2 prob=0.9980195575470634  
GTGACGGCAACCGTCTGCACGGTGACGAATCGCTGGCGATCAAAAAGGGGCGATATTGAA  
CCTTCGATTATGCTTGATGGGTGTATTCTCAGTAATACTGTAAAGCCGGAGCATGTCTCC  
GGCTTTACAGTATGGGGGAACAGCGGGCGATCGCTCAAATGGTATGCTGGTTTATTTTCAT  
GTAAAGAATAA

>AA QryID: NC\_000913\_(-)\_924842\_925081 HitID: NC\_011415\_(-)\_1009493\_1009732  
rank=1 bitscore=121.0 evalue=1.0E-25 perc\_ident=86.08 perc\_conserv=87.34 perc\_gaps=0.0  
query\_cvg=100.0 subj\_cvg=100.0 alpha=61.37 beta=3 prob=0.9980195574335429  
GTGCGAGCTTTTTTTTCGCATTTTATCTGTCTGTACGGCAGTGAACATGGTGGGCGGGTG  
GAGTATGTTACCTGTGAATTTCTAAGCTGCCTGTACGGCAGTGAACCTAAATACTACACG  
TTTAGCCCGTTGTTAATAAAGCAAAACCATCCCATTCTCCTGCAGCACCTTTTTTATCC  
TTACCTTCCCGCAGCACTAATTATCAACAACCTACCATCATCATTAATAAAAAAGGGTCTGA

>AA QryID: NC\_000913\_(+)\_1285932\_1286207 HitID: NC\_007779\_(+)\_1288286\_1288561  
rank=1 bitscore=154.0 evalue=1.0E-35 perc\_ident=100.0 perc\_conserv=100.0 perc\_gaps=0.0  
query\_cvg=100.0 subj\_cvg=100.0 alpha=79.44 beta=14 prob=0.9980195574084554

ATGGTGGTGGGGGAAGGATTACTCAGCGCTGCGCGCTTCGCCCTTCGGGTCGTTGCCTGC  
 GGCAACGCTCTCTCGCTGGCGCTCAAGTCGAACCTTGGTCAAGCTTCTCATCCTTCCCC  
 GCTTGGGCAGAATATTTGATTGCGGATTGTTTTGAGAATCCGGGGCTTTTGAAAGTGAT  
 GGTGGTGGGGGAAGGATTACTCAGCGCTGCGCGCTTCGCCCTTCGGGTCGTTGCCTGCGG  
 CAACGCTCTCTCGCTGACGCTCGAGCCGAACCTTAG  
 >AA QryID: NC\_000913\_(+)\_1328737\_1328949 HitID: NC\_011742\_(+)\_1393671\_1393883  
 rank=1 bitscore=143.0 eval=4.0E-32 perc\_ident=100.0 perc\_cons=100.0 perc\_gaps=0.0  
 query\_cvg=100.0 subj\_cvg=100.0 alpha=73.95 beta=10 prob=0.9980195571890661  
 TTGCAGACAAATATACCACGCTGGTGGCAAGAGCGCCTTACTGGCAACTTTGGATTTTGC  
 ATGCTAATAAAGTTGCGTATCGGATTTTATCAGGTACAGTGTGACGCTTTCGTCAATCTG  
 GCAATAGATTTGCTTGACATTCGACCAAAATCCGTCGTGCTATAGCGCCTGTAGGCCAA  
 GACCTGTAACTCAGTCACGTGAATTTCTGTA  
 >AA QryID: NC\_000913\_(-)\_1407287\_1407523 HitID: NC\_013008\_(-)\_1883413\_1883649  
 rank=1 bitscore=120.0 eval=3.0E-25 perc\_ident=96.15 perc\_cons=97.44 perc\_gaps=0.0  
 query\_cvg=100.0 subj\_cvg=100.0 alpha=77.65 beta=1 prob=0.9980195569647516  
 GTGGTCATCGACGCAAAGTTAGCAGGCGGTATCCTCGCAGATCTACGCTCACGATGCGA  
 CAATTTAATCGGTTCTTCATCGGGTGGTGGGTCAGGCATGGGTTGCGGGCGAGGGATCGG  
 ATCGGGCACTGGAACAGGATCGCCAGGAATCGGTTACAGGACAGGAATTTGCAAATAAAT  
 AAGTGTGTCATATTTCCCTCTGGTCATTGGGTGGACTCTTAAAGGGTAGACGCTGA  
 >AA QryID: NC\_000913\_(-)\_623737\_623946 HitID: NC\_012947\_(+)\_3197177\_3197383  
 rank=1 bitscore=114.0 eval=2.0E-23 perc\_ident=100.0 perc\_cons=100.0 perc\_gaps=0.0  
 query\_cvg=98.55 subj\_cvg=100.0 alpha=73.13 beta=1 prob=0.9980195512160394  
 TTGATGGATTTCGCATAAGCGCAATGTGATGTCCTGCGCCGTTCTGCCCCCTCTCCCTTC  
 AGGGTGAGGGCTGGGGTGAGGGTTAATGTTTCGCACCAAGTGTGGCTGTTCCCTCACCT  
 AACCTCTCCCCAAAGGGGCGAGGGGACGGATTGTGCGCTTTGTCGAATTTGTCATTACG  
 CCCTTAACCTTATTAATAACAGGAAGCTGA  
 >AA QryID: NC\_000913\_(+)\_3483920\_3484135 HitID: NC\_011750\_(+)\_3985169\_3985384  
 rank=1 bitscore=132.0 eval=7.0E-29 perc\_ident=100.0 perc\_cons=100.0 perc\_gaps=0.0  
 query\_cvg=100.0 subj\_cvg=100.0 alpha=78.67 beta=9 prob=0.9980195462481621  
 ATGCTGAAGCGAGACACCAGGAGACACAAAGCGAAAGCTATGCTAAAACAGTCAGGATGC  
 TACAGTAATACATTGATGTACTGCATGTATGCAAAGGACGTCACATTACCGTGCAGTACA  
 GTTGATAGCCCCTTCCCAGGTAGCGGGAAGCATATTTTCGGCAATCCAGAGACAGCGGCGT  
 TATCTGGCTCTGGAGAAAGCTTATAACAGAGGATAA  
 >AA QryID: NC\_000913\_(+)\_4499057\_4499251 HitID: NC\_011745\_(+)\_5068276\_5068470  
 rank=1 bitscore=116.0 eval=3.0E-24 perc\_ident=100.0 perc\_cons=100.0 perc\_gaps=0.0  
 query\_cvg=100.0 subj\_cvg=100.0 alpha=70.08 beta=3 prob=0.9980195454065102  
 TTGTTGCACGATCGATCAATTGTTATGCATGCTGACACCACAACCCCGGTGGGTATGACC  
 GATGCCTTTCTCACTCTCTTCCCGTCATCGTCGGCCTTCCCGTTATTGTGGCGTGTCA  
 GCACCTCGACGGCATTTTCGATGGCTGCTCAGTGTTCACTCACGTTACGGCCCGCATAAC  
 CCGTTGACTTCCTGA  
 >AA QryID: NC\_000913\_(-)\_4276247\_4276465 HitID: NC\_009801\_(-)\_4617308\_4617526  
 rank=1 bitscore=127.0 eval=2.0E-27 perc\_ident=100.0 perc\_cons=100.0 perc\_gaps=0.0  
 query\_cvg=100.0 subj\_cvg=100.0 alpha=72.75 beta=8 prob=0.9980195413767872  
 ATGCGTGGCGGACAATCCCCTGCCAGCGAAACGTTATCTTCTGCTCCAGGTTTGCACA  
 ATTTGCTGCGTCGCAAAAAGCAAACGTTTAGCTCCGCGCATACAAAACGGGTGGTAAAA  
 AAAGCAAACGATTATCCGGCGATCATAGCGGCTTTTTCAACCGAAGTTTGCTGCTTTTTT  
 CTCTTTTATTGTCTTGACGATGAAAAACCAGGCAATTGA  
 >AA QryID: NC\_000913\_(-)\_331090\_331275 HitID: NC\_012947\_(+)\_3480705\_3480890  
 rank=1 bitscore=115.0 eval=9.0E-24 perc\_ident=100.0 perc\_cons=100.0 perc\_gaps=0.0  
 query\_cvg=100.0 subj\_cvg=100.0 alpha=69.32 beta=4 prob=0.9980195341700309  
 ATGAGCAAAGGCGCATTTATGAATTTAACAATCCAGATCAACTGAAAATACCTCTCCCT  
 CATAAACACATAGCGTCAACATTCAATGACATAATGAGTAAAGATGTTGGTTATGCATAC  
 GTATCACTACTCTATGCCTGTCCCTTAAAAACCCACTCATTAAGACTGAATCCATTACAGC  
 AAATGA  
 >AA QryID: NC\_000913\_(+)\_1333619\_1333801 HitID: NC\_011748\_(+)\_1477322\_1477504  
 rank=1 bitscore=112.0 eval=6.0E-23 perc\_ident=100.0 perc\_cons=100.0 perc\_gaps=0.0  
 query\_cvg=100.0 subj\_cvg=100.0 alpha=74.55 beta=3 prob=0.998019527466388  
 TTGGTCTTGATGGGCGCGTTTTCTCTGTGATGCTCTTCTGGGCCGAACCTCTGGAT  
 CATTACTACTGATCCTTGACCCCGCTGCGGCGGGGTTGTCATTTGCTTTGCCACAAGGT  
 TTCTCTCTTTTATCAATTTGGGTTGTTATCAAATCGTTACGCGATGTTTGTGTTATCTT  
 TAA  
 >AA QryID: NC\_000913\_(-)\_389121\_389390 HitID: NC\_010473\_(-)\_328452\_328721

rank=1 bitscore=139.0 evalue=8.0E-31 perc\_ident=100.0 perc\_conserv=100.0 perc\_gaps=0.0  
 query\_cvg=100.0 subj\_cvg=100.0 alpha=84.67 beta=14 prob=0.9980195202604232  
 ATGCTGCGTTACAGACGAATGGTTCAATTATTCTTTCCCCTAAGTCCGAATGTGGACATA  
 TATAATTTATGGAGAAAAACACGCATCAAATTCATAAAAGCACAGTATTTCAACATGTTG  
 CAGATAATTTTGTGTTTGAAGCATACGCATAATAAATATCACAAACACAAACCAGATAAA  
 TATCCTATGAATATGCAACAAAGTTTTAATTATTCAATTTATAGCAGCGCAACCAAACCTC  
 CAAAAATAATAACCAACAGCTATAAATAA  
 >AA QryID: NC\_000913\_(-)\_3107257\_3107460 HitID: NC\_017652\_(-)\_3292215\_3292418  
 rank=1 bitscore=117.0 evalue=2.0E-24 perc\_ident=95.52 perc\_conserv=95.52 perc\_gaps=0.0  
 query\_cvg=100.0 subj\_cvg=100.0 alpha=71.94 beta=7 prob=0.9980195114878191  
 TTGCGCGAATTTTCTCTCTCTGTACGGAGTTTGCCCGATGCACGCCATCTCCTTACATT  
 CTCTCGCTTATCGCCGTTTCGCGCGAAACGTTTCCCTTTCTATGTTACTGCTCATGCGGT  
 GAAGTTAACGCACGCTCACTGCAGACAACAGTAAATCAGAGCGTTTCTGCTTTTACTG  
 ATGTCTGGCGGTCGGAGCTGGTGA  
 >AA QryID: NC\_000913\_(-)\_4540736\_4540924 HitID: NC\_008253\_(-)\_4847951\_4848166  
 rank=1 bitscore=109.0 evalue=6.0E-22 perc\_ident=95.08 perc\_conserv=96.72 perc\_gaps=0.0  
 query\_cvg=98.39 subj\_cvg=85.92 alpha=55.9 beta=2 prob=0.998019507143106  
 ATGTTTATATTGCATGAGGTGGTTTTTGGAGAGAAGAATGAGGAAGATGCGTCGAGCCAC  
 AGAAACGTTAGCTTTACATATAGCGGAGGTGATGTGAAATTAATTTACAATAGAAATAAT  
 TTACATATCAAACAGTTAGATGCTTTTTGTCGTTTTTAATATTTTATGCTTGAGAAAA  
 AATACGTAA  
 >AA QryID: NC\_000913\_(-)\_4570184\_4570381 HitID: NC\_017638\_(-)\_4551939\_4552136  
 rank=1 bitscore=110.0 evalue=3.0E-22 perc\_ident=100.0 perc\_conserv=100.0 perc\_gaps=0.0  
 query\_cvg=100.0 subj\_cvg=100.0 alpha=100.0 beta=2 prob=0.9980195032143049  
 TTGAAAGAAAACCTTTCAGAATATTGTATAGTTACTCAGGCGGCAACAACCTATTTTTTCA  
 GGTGATACTATAAATCAATTTTAGATAAAAATGATATCAACCATCTATTAATCACAACCT  
 CATTTATCACCTGATTTTATAATTTCAAATGAAAATAAATCTCAAACAATCAAAAAGTAT  
 TCAGTAGCTGACATTTAA  
 >AA QryID: NC\_000913\_(-)\_3646125\_3646286 HitID: NC\_009800\_(-)\_3690613\_3690774  
 rank=1 bitscore=103.0 evalue=3.0E-20 perc\_ident=100.0 perc\_conserv=100.0 perc\_gaps=0.0  
 query\_cvg=100.0 subj\_cvg=100.0 alpha=69.56 beta=1 prob=0.9980194986255106  
 TTGCAAGAATTAGCGATTTCTTCAGCTGGCGGAGGGAGCACTTCGGTATATATCGCAGTG  
 ACGATTTATATACTTTCACTGGGTCATCGTCATATTAAGCCTTGTCGAATCCGGATGTA  
 AAAAAACCGACTTTGCGTCGGTTTTTACTTTCCAGCCCTGA  
 >AA QryID: NC\_000913\_(-)\_3403155\_3403322 HitID: NC\_017625\_(+)\_478470\_478631  
 rank=1 bitscore=105.0 evalue=5.0E-21 perc\_ident=100.0 perc\_conserv=100.0 perc\_gaps=0.0  
 query\_cvg=96.36 subj\_cvg=100.0 alpha=84.66 beta=4 prob=0.9980194009893304  
 GTGTCAATGTTAGACTTGACGGACATTGTGCAGCGATCTGCTGCTATCCTCCGGCAAAAA  
 ACAAATATACCTTCGTTGCGCCAATGTCACCTTTCCGCAGCGCAAAAACCTGCGTCAGG  
 GAGGACGAGGTGCGACATTATAACGATTCGTAGCAATTGGCAGCTAA  
 >AA QryID: NC\_000913\_(+)\_668335\_668505 HitID: NC\_013654\_(+)\_640618\_640788  
 rank=1 bitscore=99.4 evalue=5.0E-19 perc\_ident=100.0 perc\_conserv=100.0 perc\_gaps=0.0  
 query\_cvg=100.0 subj\_cvg=100.0 alpha=68.58 beta=2 prob=0.9980193896502585  
 TTGTCGCCGAATCGGCTTTGAAAGTGGGCTATCATCCCAACCCGCGCCGAGATTGCAT  
 CGCCATTTTTGTAAACAATTTCTACAAAGTCGTGTCTGGCGGAAAAAGTCTGGCTGCGG  
 AGAATATCAGCCTGCCCGGGTCTGTCAATGGTCGTTGCGGCTTACCCGTAA  
 >AA QryID: NC\_000913\_(+)\_4558715\_4558924 HitID: NC\_011415\_(+)\_4809653\_4809862  
 rank=1 bitscore=119.0 evalue=4.0E-25 perc\_ident=98.55 perc\_conserv=98.55 perc\_gaps=0.0  
 query\_cvg=100.0 subj\_cvg=100.0 alpha=76.34 beta=10 prob=0.998019383333812  
 TTGTTTTTTTGTGTTTGTGTGTTGCTTGAGCCAGGAAAATTCCTGGAACGAAAAACCTT  
 ATCAGCCATGTGGGTATGGGGAAAATGCAAGTATGTTTCTGGCTATGCGTTTTTGCATA  
 GCGGAAAAATTACGCTGTGTGGAAAAGGCTCTGCGCAGGATTGAGTTGCAGAAAATTCAT  
 AAACCAAGTGACAATGACATCAGTAAATAA  
 >AA QryID: NC\_000913\_(-)\_344278\_344448 HitID: NC\_017641\_(-)\_383799\_383969  
 rank=1 bitscore=95.5 evalue=6.0E-18 perc\_ident=100.0 perc\_conserv=100.0 perc\_gaps=0.0  
 query\_cvg=100.0 subj\_cvg=100.0 alpha=66.43 beta=1 prob=0.9980193475353165  
 ATGTCAACCAACACATTCACAAAACATCTGCATGAGATCATTTTTTATACACCGCATGGC  
 TGCAGAAACCACTACTGGTGCTTTTTTAAGCGAAGTGTCGCCGATCACAACAAAATATCGG  
 CGAAAAAAGAGATGGAATGCCAGTTGGCATAACAGATATACAGATGAAATGA  
 >AA QryID: NC\_000913\_(-)\_320463\_320633 HitID: NC\_011353\_(-)\_367834\_368004  
 rank=1 bitscore=100.0 evalue=2.0E-19 perc\_ident=100.0 perc\_conserv=100.0 perc\_gaps=0.0  
 query\_cvg=100.0 subj\_cvg=100.0 alpha=78.57 beta=3 prob=0.9980192608824537

ATGGGGAAATCGACGATCATTTTTGGCATAAGAAATCCATTTAAAAATGGCTACATCCCT  
 TATACCTATTAGAGCTACTTATTCAGGGGTTATTGAGATATACACTGATGGTGTACAAA  
 AAAATCACCGACAATAATCACGTATCAAGTAATAGTCGGGATTTTATTAA  
 >AA QryID: NC\_000913\_(+)\_3783062\_3783259 HitID: NC\_011415\_(+)\_4036203\_4036400  
 rank=1 bitscore=105.0 eval=7.0E-21 perc\_ident=100.0 perc\_cons=100.0 perc\_gaps=0.0  
 query\_cvg=100.0 subj\_cvg=100.0 alpha=76.58 beta=6 prob=0.9980191341172087  
 GTGATTAACCAAGGAGTATACCTGCGCGGTGCGGCAAATACAGCCAGCGCG  
 TTAAGTGAATGCAATTTTTCGGGGCGCGACGAAAAAAGCGTAAATCTGGCATCGGCT  
 TGCCGCGAGCGGTGCTATATTTGATCTTCAGAGGCTATTTTATCGATTACAGCTGTAGTA  
 AAATTACGCAATTTTGA  
 >AA QryID: NC\_000913\_(+)\_2967311\_2967505 HitID: NC\_017634\_(+)\_2956289\_2956483  
 rank=1 bitscore=82.8 eval=5.0E-14 perc\_ident=76.56 perc\_cons=76.56 perc\_gaps=0.0  
 query\_cvg=100.0 subj\_cvg=100.0 alpha=55.98 beta=2 prob=0.998019098079953  
 GTGACCCAGGTCACACCTCTCATTTACGGGTTGGCGAAAGATCAACCAATGCCGTATTTA  
 TCCACAGAATGTGCCACTAAGTTAAGCACTGAACCACTAAAACTGGAGTTTCGTCGCAC  
 GTCAAGGCTGTAAATGGAAACAGTAGTGGAGGTTTTTCACAGTTATCCAGCTTTCTGTG  
 GATAACATGGTGTA  
 >AA QryID: NC\_000913\_(+)\_2613934\_2614110 HitID: NC\_007946\_(+)\_2751736\_2751912  
 rank=1 bitscore=102.0 eval=6.0E-20 perc\_ident=100.0 perc\_cons=100.0 perc\_gaps=0.0  
 query\_cvg=100.0 subj\_cvg=100.0 alpha=75.95 beta=5 prob=0.9980190963604579  
 TTGCGATCCGCAATTGTATCGAAATGTCACAAAAAAGACTTCGCTTTTATGACGGATTC  
 AGGAAACTGAAAAGTCATTTGAGTGGGCTAATCTTCGCCGTTACACTCAAAGGCGGCGCG  
 GTGGGAACGATATTTACAGTATCGGTCAATGACTATCTCCAGAAATACAGGATAG  
 >AA QryID: NC\_000913\_(-)\_1078257\_1078448 HitID: NC\_017651\_(-)\_1079160\_1079351  
 rank=1 bitscore=109.0 eval=3.0E-22 perc\_ident=100.0 perc\_cons=100.0 perc\_gaps=0.0  
 query\_cvg=100.0 subj\_cvg=100.0 alpha=74.19 beta=8 prob=0.998019093162009  
 ATGTTTTACCAGGGCGACCGTATCCTGCCGGAAGCGCTGGTTATTCACAATCGATTAAAC  
 ACACCATTTACATTAATTTTGTGCTCAGCGACACTATTTTTCATCAGGTTGCACTCTC  
 TCACATTTTTGCGGTTGCACCTTTCAAAAATGTTAACTGCCGAGAGAAAAAGTCTGAG  
 TTATTTTTTTAA  
 >AA QryID: NC\_000913\_(+)\_2492469\_2492645 HitID: NC\_008253\_(+)\_2517891\_2518052  
 rank=1 bitscore=84.0 eval=2.0E-14 perc\_ident=88.68 perc\_cons=94.34 perc\_gaps=0.0  
 query\_cvg=91.38 subj\_cvg=100.0 alpha=84.86 beta=1 prob=0.9980190903547581  
 TTGGGTGAGCATGAAATGAGAAATCAGAGAGCAACGGTCATTTTGAAAGGGTTATCTTAC  
 AGTTGTAGTTATTATCGCAAGAAGTATTTTGTCTTACAATTGTAGGAATATGCTTCCTG  
 TCGCAGAGAACTATTCTTATATACCACAAAGAGATGTCATTTATTATATCGATGTAA  
 >AA QryID: NC\_000913\_(+)\_4566811\_4566984 HitID: NC\_012947\_(-)\_3864233\_3864406  
 rank=1 bitscore=94.4 eval=2.0E-17 perc\_ident=100.0 perc\_cons=100.0 perc\_gaps=0.0  
 query\_cvg=100.0 subj\_cvg=100.0 alpha=74.15 beta=2 prob=0.9980190898776995  
 TTGCGGTTAATCAAAAGAGCGCGGTGGAAAGGGGAATATCTGCCGGGTACAGGACATGTA  
 AAACGCGAGCTTGTTCGGAAAAATGTATCGTTTGCAGAAGAATAAAAAATAGCCTGGAA  
 AGCGCCTCGGGGAATGGGAAATTGCCGGGTGAGAATGGTTTTGTAGTCGCTAA  
 >AA QryID: NC\_000913\_(-)\_384090\_384305 HitID: NC\_017633\_(-)\_445730\_445945  
 rank=1 bitscore=92.0 eval=9.0E-17 perc\_ident=100.0 perc\_cons=100.0 perc\_gaps=0.0  
 query\_cvg=100.0 subj\_cvg=100.0 alpha=77.79 beta=1 prob=0.9980190470823385  
 TTGGGAAAATTACTACACTTCAATTTAGTGATGCATAAACAACCACATTACGAGATTTAT  
 TACTTCATTATTTCTATCAATATCAATACATATAATAAACTATTATATTCGCATTGTAT  
 ATATCACTGTATCATTTCTCAATCACTCGCATATTACATTCACATAATGTATATAACAAT  
 GCTTGTTACAGAACATATTTTTTAAATGCAATTAA  
 >AA QryID: NC\_000913\_(+)\_1225443\_1225670 HitID: NC\_011415\_(+)\_1293947\_1294174  
 rank=1 bitscore=110.0 eval=3.0E-22 perc\_ident=100.0 perc\_cons=100.0 perc\_gaps=0.0  
 query\_cvg=100.0 subj\_cvg=100.0 alpha=81.81 beta=9 prob=0.9980188316436415  
 ATGGCGCTGATTCATAGCTTAAAAAATACCCTTGTCATCAACCCATTGCCGTCGTAATT  
 TTGATTGTTCTTATTTACGCTTCCTTTTCCGCACCCTAATCGTGACAGCATCTCCAGAC  
 CTGTTTAAATATCCAGTATTGAGGCAAGTGTATTTTTTACCACGCCAGGCTTTCTTAAC  
 TTTCCATTTTTTTCGGCATCATTAAGAAGACAGATACCCGTTATCTTAA  
 >AA QryID: NC\_000913\_(-)\_11921\_12070 HitID: NC\_013008\_(-)\_11938\_12087  
 rank=1 bitscore=94.7 eval=1.0E-17 perc\_ident=97.96 perc\_cons=97.96 perc\_gaps=0.0  
 query\_cvg=100.0 subj\_cvg=100.0 alpha=69.72 beta=4 prob=0.9980187646224501  
 TTGCAGACTCACTCACTGCGGTTGACTACTAAATGGGGTCGTAAACCACGTCATCAAGGG  
 GGAGATGCAAAAATTTTTGTGCTTTTTCGCAGAAATTTTCGCGATATGGCAGGACAAGAC  
 GTAAATTGACAGCAATTTTATTCATATA

>AA QryID: NC\_000913\_(-)\_3948013\_3948198 HitID: NC\_011415\_(-)\_4204140\_4204325  
 rank=1 bitscore=107.0 eval=2.0E-21 perc\_ident=100.0 perc\_cons=100.0 perc\_gaps=0.0  
 query\_cvg=100.0 subj\_cvg=100.0 alpha=100.0 beta=7 prob=0.9980187301855183  
 GTGAAAAAATTCAATTCAGTATGAATGTTGTTCCCTTCCTCGTAGTTCATCCTTTGTC  
 CGCTGCATTTTTGCGAGCATCATTCCACCGCCAGAACAACTCAACTTCACTTGCACAAAT  
 AACAGGAATCAGCCACTAAATTCACGAATTAGCGGGCTACAGCAGCGATATCTTATGC  
 ACATAA  
 >AA QryID: NC\_000913\_(-)\_3663918\_3664103 HitID: NC\_012947\_(+)\_245620\_245790  
 rank=1 bitscore=85.5 eval=7.0E-15 perc\_ident=98.21 perc\_cons=98.21 perc\_gaps=0.0  
 query\_cvg=91.8 subj\_cvg=100.0 alpha=70.7 beta=2 prob=0.9980186983420329  
 GTGTTGATAAGATATATGTTATATGAATGTTTATTAATGTAGCGATTACCTTTAATGTC  
 ACGAAAAGGATTATTTGCTTACTATTAATTTCCCTGTGTTCTTAAACACGTTTTTGTAT  
 TATAAATCCAGTCATCCTGCCCGTAGAACATCACACATTATCATCCTGTTCTCCCGCTTC  
 GTTTAA  
 >AA QryID: NC\_000913\_(+)\_2734935\_2735141 HitID: NC\_013941\_(+)\_3239568\_3239774  
 rank=1 bitscore=103.0 eval=4.0E-20 perc\_ident=95.59 perc\_cons=95.59 perc\_gaps=0.0  
 query\_cvg=100.0 subj\_cvg=100.0 alpha=71.88 beta=8 prob=0.998018670218997  
 TTGAGCTGCCGTTTTTTTATTCTGTCAGTTGTGAACTGAAGCGATTTAGTCGCTATCGA  
 TCTCATCAATATGGCTCGCTTTGAGATATTCCTCAAGTAAAAAACATCTCTTCCTGCG  
 ATTTCTCACAAAAAAGATTCTGTTGACAAAAAGTGACAAAATTATGAGATTTTCATCACAC  
 ATTTTGACATCAGGAACGGTATGCTGA  
 >AA QryID: NC\_000913\_(+)\_3416859\_3417035 HitID: NC\_011748\_(+)\_3768466\_3768642  
 rank=1 bitscore=108.0 eval=1.0E-21 perc\_ident=100.0 perc\_cons=100.0 perc\_gaps=0.0  
 query\_cvg=100.0 subj\_cvg=100.0 alpha=76.57 beta=9 prob=0.9980186530265531  
 TTGCGCCAAATGTGGCGCATGTTTCATTTTCGCACCATTGCGGGGCGCTGTTTTTATTA  
 TTTCTGTCTACACTCAGCTTATTGCGACGCGAAATCGTGCGCAAAAGCTGGCACTACTT  
 TTGCTTATAAGAGGATGGCCACAGACAGGTAAAGACGTTTCCCAAACGTCCTATAA  
 >AA QryID: NC\_000913\_(-)\_3717184\_3717336 HitID: NC\_012947\_(+)\_191405\_191557  
 rank=1 bitscore=92.8 eval=4.0E-17 perc\_ident=100.0 perc\_cons=100.0 perc\_gaps=0.0  
 query\_cvg=100.0 subj\_cvg=100.0 alpha=78.0 beta=3 prob=0.9980185124381105  
 ATGCCGATATATCTCTTACCACTCTGTTTTGTAAAGATTTGAAATCTAACCTTCTGC  
 GAAGGCGTAAATCTCTGGCTACAAAAAAGGCAACGGCACTATCATTTTTTAACAATGAAA  
 CAACAAATTAACCTTGTTTCATTTTCTCCATGA  
 >AA QryID: NC\_000913\_(-)\_1355177\_1355377 HitID: NC\_011751\_(-)\_1609010\_1609210  
 rank=1 bitscore=79.0 eval=7.0E-13 perc\_ident=75.76 perc\_cons=75.76 perc\_gaps=0.0  
 query\_cvg=100.0 subj\_cvg=100.0 alpha=75.76 beta=2 prob=0.9980184739164875  
 ATGACACGCACTGCAGCGTGCTTTAATGGGTTTCTCACGATCGTACCGCTCTGCTCCTCG  
 CTAAGTTGTTCTGTGAGTTATAGTTATAGAGAAATCACGGGTACGAATGTTGAACAGATG  
 GCGACGTCACCTGTTCAACGACCAACCACACGGCCCTCATTACGACCCCTGAACACAAAC  
 GGTAATGGCAAATGTCATTAA  
 >AA QryID: NC\_000913\_(-)\_3199004\_3199210 HitID: NC\_011745\_(-)\_3650061\_3650267  
 rank=1 bitscore=119.0 eval=6.0E-25 perc\_ident=100.0 perc\_cons=100.0 perc\_gaps=0.0  
 query\_cvg=100.0 subj\_cvg=100.0 alpha=83.04 beta=14 prob=0.9980182539821786  
 ATGGAAAGTGAACGATAGTAGTGGCATCAGTGCTCGCTACGCAAGCATTCGACATCAAT  
 CGGAATCCTCTGTGTGAGGTCTTGCCACTGCTTCAAACCTTTACGCCCGTCAAATTGCCC  
 GTTGATGGAATTTGGCGCAAAATACTATCTACTGACAAAAAAGATCGCATTAAGTTTCG  
 CCGTTCATCGTCACTTATGTGACATAA  
 >AA QryID: NC\_000913\_(-)\_3048697\_3048852 HitID: NC\_007946\_(-)\_3228320\_3228475  
 rank=1 bitscore=92.8 eval=5.0E-17 perc\_ident=96.08 perc\_cons=98.04 perc\_gaps=0.0  
 query\_cvg=100.0 subj\_cvg=100.0 alpha=69.1 beta=5 prob=0.998018125203886  
 GTGATGATCAATTTTACCTTATGGTTAACAGTCTGTTTCGGTGGTAAGTTCAGGCAAAAG  
 AGAACGATTGCGTTGGGGACCGGGAGTGGCTCCGATGCTGGGTTTCGTGGTGATAATTC  
 ACCATGAAAAAGTTGTCAGCCCCGCTTATTCAATGA  
 >AA QryID: NC\_000913\_(+)\_3851285\_3851443 HitID: NC\_011751\_(+)\_4336482\_4336640  
 rank=1 bitscore=93.2 eval=3.0E-17 perc\_ident=100.0 perc\_cons=100.0 perc\_gaps=0.0  
 query\_cvg=100.0 subj\_cvg=100.0 alpha=76.84 beta=4 prob=0.9980181118871658  
 TTGAGTATCGATCACAGTTTGCCTTTGTCCAAATATTACTGTTTATTTATACAGTAAAC  
 TTCTATAATATCACTGTACGCAATGTGTTATGCGGGGGCCGCATCGTTACCCGGCGCACT  
 AAGTCTGGCTGAAACGGGTGGTGGCGTCAGCGCCTTAA  
 >AA QryID: NC\_000913\_(-)\_1327180\_1327344 HitID: NC\_011748\_(-)\_1470884\_1471048  
 rank=1 bitscore=93.6 eval=3.0E-17 perc\_ident=100.0 perc\_cons=100.0 perc\_gaps=0.0  
 query\_cvg=100.0 subj\_cvg=100.0 alpha=65.28 beta=5 prob=0.9980180125745638

TTGGTTAAACAACGCTTTGGCTCACAGTTTACAACAGGCATGTTAAGCCGTCTCGCAGAG  
 ATGTTATTGCAGCGAAAGTATGACAAAGTATCCATTTTGGCGTGTTATCGCCCCAGGCTG  
 ATTGAAATGCCCTTCTGTTTCAGGCATAAAGCCCCAAAGTCATAA  
 >AA QryID: NC\_000913\_(+)\_344240\_344404 HitID: NC\_008253\_(+)\_426652\_426816  
 rank=1 bitscore=76.3 evalue=5.0E-12 perc\_ident=79.63 perc\_conserv=83.33 perc\_gaps=0.0  
 query\_cvg=100.0 subj\_cvg=100.0 alpha=79.63 beta=1 prob=0.9980178759238272  
 TTGTTATTCCACCTGAGAGTGAATCGCAATGCAGGTAATCATTTTCATCTGTATATCTGTA  
 TGCCAACTGGCATTCCATCTCTTTTTTCGCCGATATTTTGTGTGATCGGCGACACTTCG  
 CTTAAAAAAGCACCAGTAGTGGTTTCGCAGCCATGCGGTGTATAA  
 >AA QryID: NC\_000913\_(-)\_2342616\_2342765 HitID: NC\_017328\_(-)\_2400305\_2400448  
 rank=1 bitscore=87.8 evalue=1.0E-15 perc\_ident=100.0 perc\_conserv=100.0 perc\_gaps=0.0  
 query\_cvg=95.92 subj\_cvg=100.0 alpha=76.96 beta=3 prob=0.998017866526212  
 GTGAAAATGACCCTCTTGCAAGTGCATAACTTTGTGGATAACTCAGGAAGGAAAAAGTGG  
 CTTTCGCGCACCTTAGGTCAGACAAGGTGTCCGGGAAAGTCAATGGGAAGAGAAAAATTT  
 GTTAAAAATAACTGTTTCGGCGATTCTTGA  
 >AA QryID: NC\_000913\_(+)\_2244933\_2245067 HitID: NC\_011353\_(+)\_3023253\_3023387  
 rank=1 bitscore=82.0 evalue=7.0E-14 perc\_ident=100.0 perc\_conserv=100.0 perc\_gaps=0.0  
 query\_cvg=100.0 subj\_cvg=100.0 alpha=70.37 beta=1 prob=0.9980171271773565  
 TTGTCAGCCTTTTTTGATTGCGGCGTAACGATAATGCAAACGATAACAATTATCAATCCA  
 AATGTTAAATTTTATATCCGCATGATTTGTCAGGGAAATGGAATTGAAAAAGCCCTCTCG  
 GTTGAGAGGGCTTAG  
 >AA QryID: NC\_000913\_(-)\_2693580\_2693720 HitID: NC\_017631\_(-)\_2929064\_2929204  
 rank=1 bitscore=85.5 evalue=7.0E-15 perc\_ident=100.0 perc\_conserv=100.0 perc\_gaps=0.0  
 query\_cvg=100.0 subj\_cvg=100.0 alpha=80.14 beta=2 prob=0.998017009504103  
 ATGGCAACTTATTACAGCCATTGGCGGCACGCGTTGCTAATTCACGATGGTGATTTTATT  
 TCCACGCAAACGTTTCGTCAGCGCATCAGATTCTTTATAATGACGCCCGTTTCCCCCCC  
 TTGGGTACACCGAAAGCTTAG  
 >AA QryID: NC\_000913\_(+)\_2040159\_2040308 HitID: NC\_013941\_(+)\_2436461\_2436610  
 rank=1 bitscore=87.4 evalue=2.0E-15 perc\_ident=97.96 perc\_conserv=100.0 perc\_gaps=0.0  
 query\_cvg=100.0 subj\_cvg=100.0 alpha=69.05 beta=4 prob=0.9980168091214316  
 ATGACGTGTCTGTATATTAATAAGCTAACCCGCATTGAGTTAACCAATAACGGATTCCAT  
 ACACAATACGGCCAACAGAGAAAGATACCTGTGCTCACGCCATTGCTTATATTGGCTGGT  
 TACAATATGCACTATCAATTTTTTAAATAA  
 >AA QryID: NC\_000913\_(+)\_406425\_406622 HitID: NC\_017634\_(+)\_406548\_406727  
 rank=1 bitscore=66.2 evalue=5.0E-9 perc\_ident=71.19 perc\_conserv=71.19 perc\_gaps=0.0  
 query\_cvg=90.77 subj\_cvg=100.0 alpha=67.9 beta=2 prob=0.998016774776253  
 GTGCCACTACAAGGGATCTGCGTCACATTTTTCATAATTCATGTTTTCTAATAATTAGA  
 ATATTAAACAATAACAATCCATTACTGGAATCATTTGGAATCTTTACATTATGCCGTGCA  
 CGTCTGCTGCTACGCTTTTTGTCAATTTGTAGCACAAGTAAGTGTCAGCAGTGGTGCTTCA  
 CACTTGCCCGGTAATTAA  
 >AA QryID: NC\_000913\_(+)\_2051381\_2051539 HitID: NC\_008253\_(+)\_2006300\_2006458  
 rank=1 bitscore=78.2 evalue=1.0E-12 perc\_ident=94.23 perc\_conserv=98.08 perc\_gaps=0.0  
 query\_cvg=100.0 subj\_cvg=100.0 alpha=67.29 beta=1 prob=0.998016773553605  
 ATGCAATGCAGTCTATCAGACTCATCGGGTGCCATTTTGTGCATATGCCGACTTTTATG  
 TTTTCATATCTCTAACCTGTGGGCTCCTGCTTAATCCTTAAACAACACCAGCAACTCCTG  
 CGTTTTTCATCTTCCATCGAATTTTTCATGTTGCCGCTAA  
 >AA QryID: NC\_000913\_(+)\_3079700\_3079864 HitID: NC\_011740\_(+)\_2934585\_2934749  
 rank=1 bitscore=88.2 evalue=1.0E-15 perc\_ident=98.15 perc\_conserv=98.15 perc\_gaps=0.0  
 query\_cvg=100.0 subj\_cvg=100.0 alpha=98.15 beta=3 prob=0.9980163121638808  
 TTGACGACAGCGCGTTTTGGGCTACGCCGAAATTTGCCAACAATTTACCGCAAGCCGC  
 GCGTCATGTACATGGAACATCCTTTTGGCGCTTCAGAAATCTCTGGATCATGCTCGCATG  
 TTGCGCAATCTACTCGCCCGTCCGCTGCGCTTTTCCTTATACTGA  
 >AA QryID: NC\_000913\_(-)\_3882046\_3882246 HitID: NC\_011353\_(-)\_4773360\_4773560  
 rank=1 bitscore=85.5 evalue=8.0E-15 perc\_ident=74.24 perc\_conserv=74.24 perc\_gaps=0.0  
 query\_cvg=100.0 subj\_cvg=100.0 alpha=74.24 beta=8 prob=0.9980159984675764  
 TTGTACACTCCGGAGTCAATTCTCTTTCTTATTTACCGCGCTTTCCGCACCTTTTCGC  
 AGGGAAAATGTACGACCTCACACAGTGGAAACCAGCATGGCGCGCCGGGTGGAGGATTA  
 TACGGGCTGATGGGTAAAGCGCAAGGATCGTCCTGGATCTTTATTAGATCGATTAAGCCA  
 ATTTTTGTCTATGGTCATTAA  
 >AA QryID: NC\_000913\_(-)\_2783540\_2783692 HitID: NC\_009800\_(-)\_2802963\_2803115  
 rank=1 bitscore=90.9 evalue=2.0E-16 perc\_ident=100.0 perc\_conserv=100.0 perc\_gaps=0.0  
 query\_cvg=100.0 subj\_cvg=100.0 alpha=100.0 beta=4 prob=0.9980158386061413

GTGCGGTGGGTGGTTTTGAATGAGGGCTGGTGTGTTTGGTACGTGGCACGCCACTGCAATG  
TATTTATCCATCAGTACTCATTCAAAAGTACCTGGAAAAAATGCCTGCTATGCCAAGCGG  
GCAAATTGCTTACATGTGGAATTAAGTAATTA  
>AA QryID: NC\_000913\_(-)\_4056185\_4056337 HitID: NC\_011748\_(-)\_4441822\_4441974  
rank=1 bitscore=88.6 eval=9.0E-16 perc\_ident=100.0 perc\_cons=100.0 perc\_gaps=0.0  
query\_cvg=100.0 subj\_cvg=100.0 alpha=73.87 beta=5 prob=0.9980152021270376  
TTGCAGAGTCCCTTTGTGATCGCTTTCACGGAGCATAAAAAGGGTTATCCAAAGGTCATT  
GCACCAACATGGTGCTTAATGTTTCCATTGAAGCACTATATTGGTGCAACATTCACATCG  
TGGTGCAGCCCTTTTGCACGATGGTGCGCATGA  
>AA QryID: NC\_000913\_(-)\_2261548\_2261691 HitID: NC\_011741\_(-)\_2323850\_2323993  
rank=1 bitscore=69.7 eval=4.0E-10 perc\_ident=78.72 perc\_cons=78.72 perc\_gaps=0.0  
query\_cvg=100.0 subj\_cvg=100.0 alpha=78.72 beta=1 prob=0.998014951231352  
GTGCAGACATCAAACCTTTGCTCATAACTTTACGGCTTTCCTTGCGTGCTGAAACAGAA  
GTATTATGCTTCTTGAAACGTTTCAGCGCATCTTGCTTTAACCTAAGCCAGGTTGG  
CGCTTTTTTCTCATAGAGGCTGA  
>AA QryID: NC\_000913\_(+)\_2342663\_2342806 HitID: NC\_011750\_(+)\_2460516\_2460659  
rank=1 bitscore=77.0 eval=3.0E-12 perc\_ident=97.87 perc\_cons=97.87 perc\_gaps=0.0  
query\_cvg=100.0 subj\_cvg=100.0 alpha=73.07 beta=1 prob=0.9980145907604905  
TTGACTTTCCCGGACACCTTGCTGACCTAAGGTGCGCGAAAGCCACTTTTTCCTTCCTG  
AGTTATCCACAAAGTTATGCACTTGCAAGAGGGTCATTTTCACACTATCTTGCACTGAAT  
CCCAAACATACCCCTATATATAG  
>AA QryID: NC\_000913\_(+)\_728564\_728719 HitID: NC\_011415\_(+)\_813178\_813333  
rank=1 bitscore=81.3 eval=1.0E-13 perc\_ident=100.0 perc\_cons=100.0 perc\_gaps=0.0  
query\_cvg=100.0 subj\_cvg=100.0 alpha=83.1 beta=2 prob=0.9980142123875447  
TTGCTGAGTTTTGAATACATTGAAAACCGCCAGCGGAAACGCTGGCGGTTTTTGTATCA  
GGAAGATGTTTCAAGGAATATTAGACATCGTTATACCAATCGAAACATATATTCATGAA  
ATATATATAAATATTTCTTAATTGTTCTTATCTGA  
>AA QryID: NC\_000913\_(+)\_4499955\_4500098 HitID: NC\_011751\_(+)\_5010044\_5010187  
rank=1 bitscore=87.8 eval=1.0E-15 perc\_ident=100.0 perc\_cons=100.0 perc\_gaps=0.0  
query\_cvg=100.0 subj\_cvg=100.0 alpha=100.0 beta=4 prob=0.9980135628543814  
ATGTCTTTAGATCCGCTGGCCTGCGGGCATGACAATGTCAAACAGTCAAAGATTGTGGCG  
TTGACGGTCAGTCTTGGGGACAAAAAGCTCAGTATTCTCGTTGGCAACCAGATAATTTA  
ACAGTTGATGCTGAAACGAAATAG  
>AA QryID: NC\_000913\_(+)\_660659\_660808 HitID: NC\_020163\_(+)\_1381157\_1381306  
rank=1 bitscore=90.1 eval=3.0E-16 perc\_ident=100.0 perc\_cons=100.0 perc\_gaps=0.0  
query\_cvg=100.0 subj\_cvg=100.0 alpha=100.0 beta=5 prob=0.9980134466358079  
ATGTCTAATTGGAACGGAACGCTTTTGCTCACCATAATCAACTATTTCAATAGGTTAATC  
AATGGGGTGAGTTACGGAGCAAGGCGTGGCACCGCATTTCTGCAAGTGATAAAGAAAATA  
TACAAACGCGAAGGAGATGTAAAGCATTAG  
>AA QryID: NC\_000913\_(-)\_1218429\_1218587 HitID: NC\_011751\_(-)\_1465475\_1465618  
rank=1 bitscore=64.7 eval=1.0E-8 perc\_ident=87.23 perc\_cons=91.49 perc\_gaps=0.0  
query\_cvg=90.38 subj\_cvg=100.0 alpha=63.61 beta=1 prob=0.9980130887073162  
TTGTTAATAGTTGCGATGAGGATTATTTGCGTGATATATAAAAACAACCGTGATAACACC  
AGGGTTGACAACATTTTGCCTAATAATGCCTTTCTTCAATGATCCAGGCGTTCACTGCC  
AGCAACCCATTAGCCGCACTGACATGAGAGAACTGA  
>AA QryID: NC\_000913\_(+)\_3236372\_3236509 HitID: NC\_012947\_(-)\_669235\_669372  
rank=1 bitscore=79.0 eval=6.0E-13 perc\_ident=97.78 perc\_cons=97.78 perc\_gaps=0.0  
query\_cvg=100.0 subj\_cvg=100.0 alpha=66.21 beta=3 prob=0.9980130480121164  
ATGGTCTGTCATACTTTGTTACCTGCAAAGGGGAGTAACTTCATTGCCGGTCGATCGTCA  
TTACGATGTGTGAAAAACACATCCGGTCACCGGGCAACCCGAAAGGAATACGCAGACGT  
ATTCCTTTTTTGTGTAA  
>AA QryID: NC\_000913\_(+)\_1830269\_1830439 HitID: NC\_010658\_(+)\_1820800\_1820970  
rank=1 bitscore=110.0 eval=2.0E-22 perc\_ident=100.0 perc\_cons=100.0 perc\_gaps=0.0  
query\_cvg=100.0 subj\_cvg=100.0 alpha=75.68 beta=15 prob=0.9980125764772307  
TTGACGAAATTTACTGGAAATTACTGCGCCATTCTGACGCAGCGCGCACCAAAGCGGGC  
ATTTTTTGCGCCATCGTTGACATCATTAACAACCATCGATCAAATCACTTAACAACAGGC  
GGTAAGCAACGCGAAATTCTGCTACCATCCACGCACTTTTATCTGAATAA  
>AA QryID: NC\_000913\_(-)\_753897\_754055 HitID: NC\_011750\_(-)\_716763\_716921  
rank=1 bitscore=92.4 eval=6.0E-17 perc\_ident=100.0 perc\_cons=100.0 perc\_gaps=0.0  
query\_cvg=100.0 subj\_cvg=100.0 alpha=75.44 beta=8 prob=0.9980120409091624  
TTGACAATCATTCACAAAGTTGTTACAAACATTACCAGGAAAAGCATATAATGCGTAAA  
AGTTATGAAGTCGGTATTTACCTAAGATTAACTTATGTAACAGTGTGGAAGTATTGACC



AATTCATTCGGGACAGTTATTAGTGGTAGACAAGTTTAA

>AA QryID: NC\_000913\_(+)\_2220012\_2220170 HitID: NC\_017641\_(+)\_2575738\_2575896  
rank=1 bitscore=90.5 eval=2.0E-16 perc\_ident=100.0 perc\_cons=100.0 perc\_gaps=0.0  
query\_cvg=100.0 subj\_cvg=100.0 alpha=100.0 beta=6 prob=0.9980114668524738  
ATGGATTTTTCTTCTTTGTTGCCCCGACGTGGCAGCGAAAATGGTGCAAAAACCGTAGTT  
TGCCATAAGCATGATGGAGAGAGAAAAAGAATGCTCAGTTTATTGTCTGAATTTTCAAAA  
TATTCATCTCGCTGAATTGTTATACAAGGCGCTATTCTAG

>AA QryID: NC\_000913\_(+)\_400225\_400428 HitID: NC\_011748\_(+)\_425440\_425643  
rank=1 bitscore=120.0 eval=3.0E-25 perc\_ident=98.51 perc\_cons=100.0 perc\_gaps=0.0  
query\_cvg=100.0 subj\_cvg=100.0 alpha=81.21 beta=20 prob=0.9980101673940256  
TTGTTGCAATCTTCTGCTGACAAAGCGTGCAACGTACTGGTGAAGAAAGTGCGTTATCTC  
AAGATGTGCGCAAGATCACAAAATGATGAACGGGAAGCTAATTTATTCTGGCTTAA  
TGCCATGCGGTGAGTTTTTTCTCTTAATTATAAGTTAACGAAGAGAATATATTTTCATA  
ACTTTTATTATAATAAAGTTGA

>AA QryID: NC\_000913\_(+)\_1524074\_1524223 HitID: NC\_011353\_(+)\_1956406\_1956555  
rank=1 bitscore=84.3 eval=1.0E-14 perc\_ident=100.0 perc\_cons=100.0 perc\_gaps=0.0  
query\_cvg=100.0 subj\_cvg=100.0 alpha=100.0 beta=4 prob=0.9980099924285886  
ATGATAGTTATCACCATTTATCTTTATGGGTATAAACTATCGGCGCAGCATCTACCCG  
TTATCGATAAACGATGCAAAACATCCCCTTACAATCCTGAAGGGGATTAATACAACTGAC  
GAAAAAATGACAAATCCTTTTGCTGGTTAA

>AA QryID: NC\_000913\_(+)\_4205764\_4205904 HitID: NC\_009792\_(-)\_2762980\_2763120  
rank=1 bitscore=83.2 eval=3.0E-14 perc\_ident=95.65 perc\_cons=95.65 perc\_gaps=0.0  
query\_cvg=100.0 subj\_cvg=100.0 alpha=79.03 beta=6 prob=0.9980088398842202  
TTGTGGATAACTCTGTGCGTAAAAAGGTATAAAGCGGGCTTTTGCTGGGGAATGCAGCAG  
TCAGTCATTTTTCTGCAATTTTTCTATTGCGGCCTGCGGAGAACTCCCTATAATGCGCCT  
CCATCGACACGGCGGATGTGA

>AA QryID: NC\_000913\_(-)\_4549380\_4549514 HitID: NC\_017641\_(-)\_5114874\_5115008  
rank=1 bitscore=72.4 eval=5.0E-11 perc\_ident=100.0 perc\_cons=100.0 perc\_gaps=0.0  
query\_cvg=100.0 subj\_cvg=100.0 alpha=74.53 beta=1 prob=0.9980087753921844  
ATGTCAACCCGAATTCTGAAATTGGTTAACCATCACACAAGAATTTACTCTCATGGTTG  
TTGCTGCAAATTGCAGCAAAGGTAATCGATGGTTATTGATCAGAGGATGTGACATTCAT  
CGCAACAATGGTTGA

>AA QryID: NC\_000913\_(+)\_606618\_606767 HitID: NC\_011751\_(+)\_723367\_723543  
rank=1 bitscore=81.6 eval=1.0E-13 perc\_ident=89.58 perc\_cons=93.75 perc\_gaps=0.0  
query\_cvg=97.96 subj\_cvg=82.76 alpha=45.73 beta=5 prob=0.9980085350907948  
ATGTTGGCGTTTTCTATTACAGTATAGAAGTCGGAGCGGCTGGGCGAGATGCGGAAGTTCT  
GGAATGTTTCTTTTTTTGGTGATGGTGAAGTATGATGGTGCCTGAAGCAATTTGGCTACTT  
TTGCAATGTGACAAGTTATGGCAGTGCTGA

>AA QryID: NC\_000913\_(+)\_4601017\_4601151 HitID: NC\_017641\_(+)\_5148936\_5149070  
rank=1 bitscore=71.6 eval=1.0E-10 perc\_ident=93.18 perc\_cons=93.18 perc\_gaps=0.0  
query\_cvg=100.0 subj\_cvg=100.0 alpha=75.15 beta=2 prob=0.9980085087773359  
GTGATAAAAAGCGAATTATCTCTCGCCGCAAACAACTATCACATGAATATTATCATCAT  
AATGAATTTATTGTTGGCCTTTACGAATCAGGATAATAGATAACCGGGCACGTTTTTTA  
ATGTTAACAAGCTAA

>AA QryID: NC\_000913\_(-)\_2496504\_2496641 HitID: NC\_004431\_(-)\_2780865\_2781002  
rank=1 bitscore=78.2 eval=1.0E-12 perc\_ident=93.33 perc\_cons=93.33 perc\_gaps=0.0  
query\_cvg=100.0 subj\_cvg=100.0 alpha=71.63 beta=5 prob=0.9980082688800289  
ATGACCAGCAGGCCGTTTTTGAGGAAAAACCACAATTTTAAAGGGGATTGATAGATAAA  
TGGTGTATTAGCAATGCATCTCTTGATAATGCACTTCTGGTTAGTAAATTTATTGAAATT  
ATTATGTTAATAAAATGA

>AA QryID: NC\_000913\_(+)\_395649\_395843 HitID: NC\_017641\_(+)\_432527\_432721  
rank=1 bitscore=119.0 eval=4.0E-25 perc\_ident=100.0 perc\_cons=100.0 perc\_gaps=0.0  
query\_cvg=100.0 subj\_cvg=100.0 alpha=83.0 beta=20 prob=0.9980078822121314  
ATGCCTGCATTTGTGATCCTGCGCGTGTTAATCCGCTTATGTAAACAATCTTTGGTTTGT  
GAAATCCGTCGAAACAATTCTTATGGTCAGGCTGGCGAACTAAGCGCCTTGCTATGGGTC  
ACAATGGGCGGTTTCATTTGGCTGACGCTTTGTAGCGGTCATGCGGTTAATACACAGCAG  
TTGTTAAAACGATAA

>AA QryID: NC\_000913\_(-)\_4518385\_4518507 HitID: NC\_017644\_(-)\_4483690\_4483812  
rank=1 bitscore=72.0 eval=5.0E-11 perc\_ident=97.5 perc\_cons=100.0 perc\_gaps=0.0  
query\_cvg=100.0 subj\_cvg=100.0 alpha=67.72 beta=2 prob=0.9980078407770367  
ATGGGGGAACAGCGGGCGATCGCTCAAATGGTATGCTGGTTTATTTTCATGTAAAAGAATA  
AAATATCTGTATAAAATCATGCCACTGGCAATCTGCATCAACTCTCCGGGTAAACAGGGT

TAA

>AA QryID: NC\_000913\_(+)\_989687\_989809 HitID: NC\_017641\_(+)\_1090479\_1090601  
rank=1 bitscore=77.8 eval=7.0E-13 perc\_ident=100.0 perc\_cons=100.0 perc\_gaps=0.0  
query\_cvg=100.0 subj\_cvg=100.0 alpha=68.09 beta=4 prob=0.998007651751599  
ATGCCACCTTTCTGGTCGATGGCATTACGCGGTGTATGTTATAAAAATGTAGCAATAAAG  
GCGTTTGTACCTGAAAAGATGAAGATTCTGCATAGCGCGATTACGCAACAGGAATAGAC  
TGA

>AA QryID: NC\_000913\_(+)\_4273151\_4273285 HitID: NC\_017652\_(+)\_4649511\_4649645  
rank=1 bitscore=67.8 eval=1.0E-9 perc\_ident=86.36 perc\_cons=88.64 perc\_gaps=0.0  
query\_cvg=100.0 subj\_cvg=100.0 alpha=54.17 beta=3 prob=0.9980075383048329  
TTGCAGAACACAAAAATGAAACACTCTGTTTGTTCATTAATTTGTGAACTATATCACA  
ATTGATTGTTTGTAGCCATATTAGGCCGTGACTTTTATTGCTGTACAGATTATGTGGTT  
TTTCAGTGGCATTAA

>AA QryID: NC\_000913\_(+)\_2411322\_2411483 HitID: NC\_011741\_(+)\_2455821\_2455982  
rank=1 bitscore=95.9 eval=5.0E-18 perc\_ident=100.0 perc\_cons=100.0 perc\_gaps=0.0  
query\_cvg=100.0 subj\_cvg=100.0 alpha=78.84 beta=11 prob=0.9980071371949051  
ATGCCATTGGCTGAAAATTACGCAAAATGGCATAGACTCAAGATATTTCTTCCATCATGC  
AAAAAAAATTTGCAGTGCATGATGTTAATCATAAATGTCGGTGTATCATGCGCTACGCT  
CTATGGCTCCCTGACGTTTTTTAGCCACGTATCAATTATAG

>AA QryID: NC\_000913\_(+)\_2459063\_2459236 HitID: NC\_011083\_(+)\_2546901\_2547041  
rank=1 bitscore=53.9 eval=2.0E-5 perc\_ident=67.39 perc\_cons=78.26 perc\_gaps=0.0  
query\_cvg=80.7 subj\_cvg=100.0 alpha=40.53 beta=3 prob=0.9980070068082852  
GTGACCGAAATCACACTTAAAAATGATCTAAAACAAAATTCACCCGAATCCATGAGTGCG  
CCACCTCCAAATTTTGCAGCTGGATCGCGTTTCTTAGATCATATTTGAAAAAAGATAGA  
AACATACTTGCAACATTCCAGCTGGTCCGACCTATACTCTCGCCACTGGTCTGA

>AA QryID: NC\_000913\_(-)\_395603\_395725 HitID: NC\_013008\_(-)\_461336\_461458  
rank=1 bitscore=69.3 eval=3.0E-10 perc\_ident=100.0 perc\_cons=100.0 perc\_gaps=0.0  
query\_cvg=100.0 subj\_cvg=100.0 alpha=66.25 beta=1 prob=0.9980062354471697  
TTGTTTCGACGGATTTACAAACCAAAGATTGTTTACATAAGCGGATTAACACGCGCAGG  
ATCACAATGCAGGCATTGGTGAGCAGGAAAAAGATCGTGTTACGCGCCGTTACGTTTT  
TAA

>AA QryID: NC\_000913\_(+)\_655550\_655657 HitID: NC\_009801\_(+)\_679000\_679107  
rank=1 bitscore=69.3 eval=3.0E-10 perc\_ident=100.0 perc\_cons=100.0 perc\_gaps=0.0  
query\_cvg=100.0 subj\_cvg=100.0 alpha=68.71 beta=1 prob=0.9980058585545412  
TTGATTGCATTTTGCATCAAAAAAGACTTGGTTTTCTTTTTTGAATTTCCCATCGCA  
GAAAACGACGCATCATCTTTAATCGATGCGCGGAAATATTTAACTTGA

>AA QryID: NC\_000913\_(-)\_4470595\_4470732 HitID: NC\_020163\_(-)\_471019\_471156  
rank=1 bitscore=81.3 eval=1.0E-13 perc\_ident=100.0 perc\_cons=100.0 perc\_gaps=0.0  
query\_cvg=100.0 subj\_cvg=100.0 alpha=70.16 beta=6 prob=0.998005658890217  
ATGTCTGCAATTATTGATACCGAAGGACAGTTCCCCTGCAGAATCACATCAATAAAAAAT  
GCATATACCTTGACTTTTAATTCAAATAAACCGTTTGCCTGACAAAATATTGCATCAAA  
TGCTTGCGCCGCTTCTGA

>AA QryID: NC\_000913\_(-)\_1785190\_1785357 HitID: NC\_017631\_(-)\_1941762\_1941929  
rank=1 bitscore=100.0 eval=2.0E-19 perc\_ident=100.0 perc\_cons=100.0 perc\_gaps=0.0  
query\_cvg=100.0 subj\_cvg=100.0 alpha=100.0 beta=12 prob=0.9980054738048598  
ATGAAAACAGCATTTTCATTTTTATGGTTTCGTTTATACCGATGGTTTATGTGGAAATTGT  
CGAAGAGAGCAGATTTGCGCAACGCTGGGATCAGTCTTAAAAAGTAAAAAATATATTTG  
CTTGAACGATTCACCGTTTTTTTCATCCGGTTAAATATGCAAAGATAA

>AA QryID: NC\_000913\_(-)\_1108356\_1108514 HitID: NC\_011741\_(-)\_1150952\_1151110  
rank=1 bitscore=99.8 eval=3.0E-19 perc\_ident=100.0 perc\_cons=100.0 perc\_gaps=0.0  
query\_cvg=100.0 subj\_cvg=100.0 alpha=100.0 beta=12 prob=0.9980052325337423  
GTGCTTATATCGATCCGATCTATTTAATGGATAACCAGCCATTCCGACAACAGAATCCC  
GGTATCGTTCAGCACGCTGGCTCATGGATTAAGCACCTGATTGCAACCGTTTTCACTTTC  
CGTGCTTCTCTAAAGACAGAAGCATCGACTTCGTGTAG

>AA QryID: NC\_000913\_(-)\_1438818\_1438949 HitID: NC\_009801\_(-)\_1549695\_1549826  
rank=1 bitscore=70.5 eval=1.0E-10 perc\_ident=97.67 perc\_cons=97.67 perc\_gaps=0.0  
query\_cvg=100.0 subj\_cvg=100.0 alpha=72.61 beta=2 prob=0.9980050861915521  
TTGATCAAAACATTACCTACGCTGATGTGGGGGACACAAAAGCGAAAATGCAGAAAGAAAG  
CCATTTGCTAAAATTGAAAGATTACTACTGGGCGCGCAGCAATTCGTGCGCCCCTCATT  
TGCGCAATGTAA

>AA QryID: NC\_000913\_(+)\_4259385\_4259510 HitID: NC\_009800\_(+)\_4293106\_4293231

rank=1 bitscore=72.0 evalue=4.0E-11 perc\_ident=97.56 perc\_conserv=97.56 perc\_gaps=0.0  
 query\_cvg=100.0 subj\_cvg=100.0 alpha=67.88 beta=3 prob=0.9980048363950997  
 TTGGGTTCTTTTTCTCTATCAATACTATTAGCAGGGAGATATATCACCAGAGTTTAATG  
 TGTGATTTTTTATTTATCGTCGAACCTGGATTGTTTATCATTGGCCTTAACAAAGTTAAC  
 GGCTAA  
 >AA QryID: NC\_000913\_(-)\_4173106\_4173267 HitID: NC\_011415\_(-)\_4444654\_4444815  
 rank=1 bitscore=87.0 evalue=2.0E-15 perc\_ident=100.0 perc\_conserv=100.0 perc\_gaps=0.0  
 query\_cvg=100.0 subj\_cvg=100.0 alpha=100.0 beta=7 prob=0.9980044707852118  
 GTGCTCAACAATGCGCTCCTGCTAAACCATAATTCTTTTTATCAGATGGAATATCTGTCA  
 CATTGCTTTTCAACGATAGCTTCCTGGCAGAGATTTTTCTTATTATTCCTCCCCATCTG  
 GTGTTACCCTCCTGCCCATTAAACCCATTCAACAGAACTGTGA  
 >AA QryID: NC\_000913\_(+)\_1864616\_1864717 HitID: NC\_009800\_(+)\_1884569\_1884670  
 rank=1 bitscore=68.2 evalue=7.0E-10 perc\_ident=100.0 perc\_conserv=100.0 perc\_gaps=0.0  
 query\_cvg=100.0 subj\_cvg=100.0 alpha=69.99 beta=1 prob=0.9980042880788149  
 ATGACACCGCGCTTACAGCCAAATGAATTTAGCGTTACTGGCGAGCCTGGTCTTTACATT  
 AATTATGCAAAATTTATGGATGAGTTGTTGATATGCCATTGA  
 >AA QryID: NC\_000913\_(+)\_2902141\_2902272 HitID: NC\_017641\_(+)\_3330679\_3330810  
 rank=1 bitscore=80.1 evalue=2.0E-13 perc\_ident=100.0 perc\_conserv=100.0 perc\_gaps=0.0  
 query\_cvg=100.0 subj\_cvg=100.0 alpha=69.79 beta=6 prob=0.9980042804909965  
 ATGGACTATTGCTATTCGGTTTATCCCCGCTGGCGCGGGGAACACGGGCGCACGGAATAC  
 AAAGCCGTGTATCTGCTCGGTTTATCCCCGCTGGCGCGGGGAACACTGGCTCTGCAACAG  
 CAGCACCCATGA  
 >AA QryID: NC\_000913\_(+)\_3245475\_3245606 HitID: NC\_017641\_(+)\_3733911\_3734042  
 rank=1 bitscore=73.6 evalue=2.0E-11 perc\_ident=100.0 perc\_conserv=100.0 perc\_gaps=0.0  
 query\_cvg=100.0 subj\_cvg=100.0 alpha=100.0 beta=2 prob=0.998003032729557  
 ATGCGCCTGTTTGTCTCGTCGGTAAGCGAAAAGTATAAAGTGTGAGCCTGTGTAAATCCT  
 CTCGCCACCCTCCCCTGCATTACAGCAAAATCAGACTCCACGGACATGTAATTTTGATAAC  
 GAACAACGTTGA  
 >AA QryID: NC\_000913\_(+)\_3667392\_3667511 HitID: NC\_017628\_(+)\_4049046\_4049165  
 rank=1 bitscore=68.9 evalue=3.0E-10 perc\_ident=92.31 perc\_conserv=94.87 perc\_gaps=0.0  
 query\_cvg=100.0 subj\_cvg=100.0 alpha=74.28 beta=3 prob=0.9980029303177347  
 ATGGCATATCATGATTGCGGCGAGAGCAGGATTGAATGTTCTGAAAATGAAAAACAACAC  
 CAAATCGGTATTTTTATAAATTCCATTGATATTAGTGCGTTATTTTTTGACAGGTTAA  
 >AA QryID: NC\_000913\_(+)\_341955\_342092 HitID: NC\_010498\_(+)\_367651\_367788  
 rank=1 bitscore=69.7 evalue=4.0E-10 perc\_ident=97.78 perc\_conserv=97.78 perc\_gaps=0.0  
 query\_cvg=100.0 subj\_cvg=100.0 alpha=97.78 beta=1 prob=0.9980028596995525  
 ATGGGGAACGTTGCTGCTCTGTTTCATTACGGCTCGCGGCATGTTGGGGCTGGATCGGGT  
 GGTTTAAATATTGGCTATATTCAATGGACGCGTTTTGCCGCGATGACATATCAGGCGTTG  
 CCAAATACACATAGCTAA  
 >AA QryID: NC\_000913\_(-)\_3677283\_3677405 HitID: NC\_010498\_(-)\_3899875\_3899997  
 rank=1 bitscore=70.9 evalue=1.0E-10 perc\_ident=97.5 perc\_conserv=97.5 perc\_gaps=0.0  
 query\_cvg=100.0 subj\_cvg=100.0 alpha=73.41 beta=3 prob=0.9980027118100279  
 TTGCGCTGTGGTGGTTTGTGTTCAACCATATTAAACAGTGTTCATTATTTTTTTGAG  
 CCAGAACGTATTCCTGAAAGATTCCGTTGTGGAGTGAGGAAATTTACCCCGGCCAGGCGG  
 TAA  
 >AA QryID: NC\_000913\_(-)\_3103540\_3103674 HitID: NC\_017641\_(-)\_3539039\_3539173  
 rank=1 bitscore=75.5 evalue=7.0E-12 perc\_ident=100.0 perc\_conserv=100.0 perc\_gaps=0.0  
 query\_cvg=100.0 subj\_cvg=100.0 alpha=100.0 beta=3 prob=0.9980024499299693  
 ATGATGGGATTCTATCAACTTCGCGGACTGGTTTTTTGTTACCTGTGGCAAATAATTGCA  
 AACATTCCCAATTTGCAAAACGAAATTGTGATGTGGATAACATTTTTGCCCTGAGCATC  
 GTCAGGGGCGGTTAA  
 >AA QryID: NC\_000913\_(-)\_655330\_655476 HitID: NC\_009800\_(-)\_692188\_692334  
 rank=1 bitscore=58.5 evalue=9.0E-7 perc\_ident=79.17 perc\_conserv=79.17 perc\_gaps=0.0  
 query\_cvg=100.0 subj\_cvg=100.0 alpha=79.17 beta=1 prob=0.9980019736362398  
 ATGCTCATATTAGATTATTTTTGAGCGCACAGCCGCGAGCTAACACCATTGCAATTAACA  
 AATTTGCATCAATCCACCATCAATTTGCACACATTATTATGTGATAATTGCCAACCGCTA  
 AATATGCGTTTTGTTATCTATGTATAA  
 >AA QryID: NC\_000913\_(-)\_642553\_642741 HitID: NC\_002695\_(-)\_724684\_724872  
 rank=1 bitscore=92.0 evalue=9.0E-17 perc\_ident=100.0 perc\_conserv=100.0 perc\_gaps=0.0  
 query\_cvg=100.0 subj\_cvg=100.0 alpha=83.8 beta=11 prob=0.9980017800122893  
 ATGCACTCGCATCCTCTTTACGCAAAATCAGCAATTTTCTGTTCTCACTGTTCACTT  
 TTGCTGCAAAATTATTCCGTTTCGTTGTGGGAATAACCATGGCAGAAGCATTTTACATC

CTGATAGGATTTCTGATTATGGCGGCGATTATCGTCATGGCTGTCCTTTACCTCGAAAAC  
CACTCCTGA  
>AA QryID: NC\_000913\_(+)\_3705917\_3706072 HitID: NC\_009801\_(+)\_4020723\_4020878  
rank=1 bitscore=77.4 evalue=2.0E-12 perc\_ident=98.04 perc\_conserv=98.04 perc\_gaps=0.0  
query\_cvg=100.0 subj\_cvg=100.0 alpha=73.38 beta=6 prob=0.9980016920519956  
GTGAAAACGTCAATACAGCCAACCGGGATTACACCAACGGTGAGAATCCACACACAAAG  
ATTAAAAAACTTCAAACAGCTATTTGCAGCAGAGAAATTTGTGCTACTCCAACATGACC  
AGAACAATCAGCTTAATATTTAGCAACATTTGGTGA  
>AA QryID: NC\_000913\_(-)\_2786856\_2786990 HitID: NC\_009792\_(-)\_3729899\_3730045  
rank=1 bitscore=59.3 evalue=5.0E-7 perc\_ident=78.05 perc\_conserv=87.8 perc\_gaps=0.0  
query\_cvg=93.18 subj\_cvg=85.42 alpha=45.9 beta=1 prob=0.9980015018460815  
ATGAGATGTAGGGTGACATGGCGATGCTCATTTCTAGCCATAATCTAAAAATATCTACA  
TTTCTGAAAAATGCGCACAAAAGCGACATATTGTTTTCTTATTGTGATCAAAAGCAACAA  
ATTAGTAACATTTAA  
>AA QryID: NC\_000913\_(-)\_471655\_471795 HitID: NC\_011353\_(-)\_542080\_542220  
rank=1 bitscore=77.0 evalue=2.0E-12 perc\_ident=97.83 perc\_conserv=97.83 perc\_gaps=0.0  
query\_cvg=100.0 subj\_cvg=100.0 alpha=73.15 beta=6 prob=0.9980014108935578  
ATGGTTCTGCTACACGAAGAAGGTATTGCAAGCGGTGTGCCAGAAATGAAAAACGAGAAA  
GAGAGCAGGAAGTTAAGAAGTTTGAAAATGAAAACGCACTATGACAGTGCACAGTGCCTT  
ACATTTTTGCACCAACGATGA  
>AA QryID: NC\_000913\_(-)\_3728871\_3729008 HitID: NC\_011415\_(-)\_3975453\_3975590  
rank=1 bitscore=68.2 evalue=1.0E-9 perc\_ident=97.78 perc\_conserv=100.0 perc\_gaps=0.0  
query\_cvg=100.0 subj\_cvg=100.0 alpha=97.78 beta=1 prob=0.9980012637882983  
ATGACCGAGATCTTACTTTTGTGCGCAATTGTACTTATTGCATTTTTCTCTTCGAGGAA  
TTACCCAGTTTCATCATTCCATTTTATTTTGCAGAGCGAGCGCACACTTGTGAATTATCTC  
AATAGCAGTGTGAAATAA  
>AA QryID: NC\_000913\_(+) \_3752565\_3752777 HitID: NC\_017635\_(+) \_3956991\_3957203  
rank=1 bitscore=124.0 evalue=2.0E-26 perc\_ident=100.0 perc\_conserv=100.0 perc\_gaps=0.0  
query\_cvg=100.0 subj\_cvg=100.0 alpha=75.99 beta=25 prob=0.9980008426104051  
ATGTGCTGTCTGGTTTTTCAACAGGACGAGGTTTATCATATTGAAATAGTGGAACTATTG  
GCCAAACTAATGAATAACTCCAGTAAAACATCCACAGTACAGATTAAGCGTATTAAACCT  
TCAATTATCTACCGTTTATTGCTGATTGGCCTCGGATCACCAATGGTGATTACGGCCTG  
GTTTCGCCCCGCTCACCATCGAAACGCGAGATTAA  
>AA QryID: NC\_000913\_(-)\_1229754\_1229864 HitID: NC\_009801\_(-)\_1321212\_1321322  
rank=1 bitscore=66.6 evalue=2.0E-9 perc\_ident=97.22 perc\_conserv=97.22 perc\_gaps=0.0  
query\_cvg=100.0 subj\_cvg=100.0 alpha=74.49 beta=2 prob=0.9980006175196339  
GTGCTCACGTGGCCTTCTGGCGACGACGCTCATCCAGCAGAAATGAAAAATATCACCCGG  
CTAAAAAATAGAATAGAAGCATTGCGCCATAATGACATTAAACATTGTTTGA  
>AA QryID: NC\_000913\_(+) \_2031510\_2031617 HitID: NC\_009801\_(+) \_2163070\_2163177  
rank=1 bitscore=61.2 evalue=7.0E-8 perc\_ident=91.43 perc\_conserv=91.43 perc\_gaps=0.0  
query\_cvg=100.0 subj\_cvg=100.0 alpha=69.32 beta=1 prob=0.9980002786986362  
TTGGATGAGCCAGTCAAGACTCAATCATTTTTTGAACAAATAGATAAATTTTGCGCAACG  
GCAGTGAATACAGGAAAAATCGTTTTGAGCGATTTTATTTATCTTTGA  
>AA QryID: NC\_000913\_(-)\_4090871\_4091023 HitID: NC\_011415\_(-)\_4354556\_4354708  
rank=1 bitscore=68.2 evalue=1.0E-9 perc\_ident=100.0 perc\_conserv=100.0 perc\_gaps=0.0  
query\_cvg=100.0 subj\_cvg=100.0 alpha=100.0 beta=1 prob=0.9980000098216022  
ATGAATAACCCATTAATGATTGATGTGGTTTATTTAAATAACCATTATGTGCATTACTCC  
GCAAATCTGACCTTTCACTCTGTCTCAAATTGTCATTGTTTACCGACATATCGCCTCTCA  
TCACTTAATCGCTCCACCATTACAATTGATTAA  
>AA QryID: NC\_000913\_(+) \_2033695\_2033838 HitID: NC\_012947\_(-)\_1801523\_1801666  
rank=1 bitscore=78.2 evalue=1.0E-12 perc\_ident=100.0 perc\_conserv=100.0 perc\_gaps=0.0  
query\_cvg=100.0 subj\_cvg=100.0 alpha=70.65 beta=7 prob=0.997999680712581  
GTGAATAATATTCAACACAGTGCAGCATCATCATTACATACTTACAGCCGCCGACTACC  
GCTTTCGATATATTGACTCAATTTTCCAGCCTGGTTAAAAATAGCGACCAGCTCAGTCGC  
AAATATAGTGACTIONCCTAACTAA  
>AA QryID: NC\_000913\_(+) \_1797111\_1797239 HitID: NC\_017641\_(+) \_2103263\_2103391  
rank=1 bitscore=67.8 evalue=8.0E-10 perc\_ident=100.0 perc\_conserv=100.0 perc\_gaps=0.0  
query\_cvg=100.0 subj\_cvg=100.0 alpha=100.0 beta=1 prob=0.9979996574039421  
GTGTCCAGTCTGGCTGCGACAATTACACCTGATGAGACAGGCTTTTTATTTTCAAAACG  
CGCATACAAAAAAGCCTCCACTGGGAGGCTTTCAGGCGCTGTTTTCCGTTTCTTCTCTC  
ACGCGCTAG  
>AA QryID: NC\_000913\_(+) \_4422883\_4423017 HitID: NC\_017644\_(+) \_4571303\_4571422

rank=1 bitscore=56.2 evalue=4.0E-6 perc\_ident=87.18 perc\_conserv=87.18 perc\_gaps=0.0  
 query\_cvg=88.64 subj\_cvg=100.0 alpha=82.23 beta=2 prob=0.9979992819676866  
 ATGATAAAGAAGTTGATGGTGACCATTTCTGATGCAGTTGTTCAAAAAACACCATGATG  
 AAGTGTGATGAAC TTCAAATCAGCGTGTTAGAGGTTAATTGCGAAAGGGGAGATTTATTT  
 CGGCTCTGCCCTTGA  
 >AA QryID: NC\_000913\_(-)\_4048807\_4048947 HitID: NC\_017646\_(-)\_4612142\_4612282  
 rank=1 bitscore=73.2 evalue=3.0E-11 perc\_ident=97.83 perc\_conserv=97.83 perc\_gaps=0.0  
 query\_cvg=100.0 subj\_cvg=100.0 alpha=97.83 beta=4 prob=0.9979991781961254  
 ATGCATCGCAGAATTTTCTCTGCTATTTTCGCATAAAGACTATCGGCAATGTCTCACAAAG  
 CGTATGGCTTTTACTTACAACGCTCACGCCGAAAAATCCGCCTTTTATTATGGTTCAGGT  
 ATAATCGCCACAAAGCTTTGA  
 >AA QryID: NC\_000913\_(-)\_4447687\_4447833 HitID: NC\_017651\_(-)\_4836367\_4836492  
 rank=1 bitscore=71.6 evalue=9.0E-11 perc\_ident=97.56 perc\_conserv=97.56 perc\_gaps=0.0  
 query\_cvg=85.42 subj\_cvg=100.0 alpha=71.75 beta=8 prob=0.9979991302967417  
 ATGAAAAATGCGGCTACGGTTATGGATTTTCTGCTCTGTATACCGTCTTAAACTGGTG  
 AAAAAGGAAAATGAAGACGAAAACAAGCGAAGACATTCCGGCGCGAGTTGGCTATAATACT  
 CGGCACTTGTGTTGCCACATATTTTAA  
 >AA QryID: NC\_000913\_(+)\_1298495\_1298650 HitID: NC\_017635\_(+)\_1390700\_1390855  
 rank=1 bitscore=81.3 evalue=1.0E-13 perc\_ident=100.0 perc\_conserv=100.0 perc\_gaps=0.0  
 query\_cvg=100.0 subj\_cvg=100.0 alpha=100.0 beta=7 prob=0.9979987983269877  
 ATGCTCCGTTTACTTCGTCATTATTTTACTTTGTCCCGCGCAGTTATCAAAGCAAAA  
 GGAATAGGTAAAAATATTCTTCTCAAATTACAGTTAGTTATAAGGATTTCTTAACTGCT  
 TCTCCTCACCATCATGTTATTTTCGCCACATCATAA  
 >AA QryID: NC\_000913\_(+)\_2042772\_2042921 HitID: NC\_012947\_(-)\_1789764\_1789913  
 rank=1 bitscore=73.6 evalue=2.0E-11 perc\_ident=100.0 perc\_conserv=100.0 perc\_gaps=0.0  
 query\_cvg=100.0 subj\_cvg=100.0 alpha=100.0 beta=4 prob=0.9979984896993503  
 ATGAACGCCATCACCATTTTCCCTCGATTATAAACTTGAGTTATTCAGTAGTCTCCCC  
 TCTTGCAACTCACACCCAAACTGCCTAACGAAAAGTTATTAATTTTCAATCATATTGCT  
 ATCAGTATTTACATTTTTTCGCTGTGCTAG  
 >AA QryID: NC\_000913\_(-)\_522152\_522274 HitID: NC\_011415\_(-)\_566506\_566628  
 rank=1 bitscore=62.8 evalue=2.0E-8 perc\_ident=100.0 perc\_conserv=100.0 perc\_gaps=0.0  
 query\_cvg=100.0 subj\_cvg=100.0 alpha=72.76 beta=1 prob=0.9979982795559654  
 ATGGATAATATCCATTCAACGCATATGATTTATGATTTTATTAGTCTGAGTTATTTTTGT  
 AGGGCTATATTTAAATCAATAAACTCCACCGATTGAGTTAATATCAGCAATAGAAAGA  
 TAG  
 >AA QryID: NC\_000913\_(+)\_3809787\_3809909 HitID: NC\_011741\_(+)\_3882447\_3882569  
 rank=1 bitscore=65.9 evalue=3.0E-9 perc\_ident=100.0 perc\_conserv=100.0 perc\_gaps=0.0  
 query\_cvg=100.0 subj\_cvg=100.0 alpha=100.0 beta=1 prob=0.9979981699496556  
 GTGAACCTCTCGATTGCCAGGCCCAAATGCCAAACCCGAGATTCTCAAAGGTGGCGTAGTA  
 TACGCTGACTCAGCGATGTGCTCAAGTCCCGAACAGACAAAGATCCCGAAGGATCGCGCA  
 TAG  
 >AA QryID: NC\_000913\_(-)\_2428801\_2428938 HitID: NC\_016856\_(-)\_2527947\_2528102  
 rank=1 bitscore=67.4 evalue=2.0E-9 perc\_ident=82.22 perc\_conserv=86.67 perc\_gaps=0.0  
 query\_cvg=100.0 subj\_cvg=88.24 alpha=50.1 beta=5 prob=0.9979979606727243  
 ATGCCGCAAAGGCATAAAAAGTCGATGGCGTTGAATATTTTTTTCAGCGCCATTTTATTG  
 ATGCGCGGGAAGGAAATCCCTACGCAAACGTTTTCTTTTTCTGTTAGAAATGCGCCCCGAA  
 CAGGATGACAGGGCGTAA  
 >AA QryID: NC\_000913\_(+)\_3204297\_3204431 HitID: NC\_009801\_(+)\_3535941\_3536075  
 rank=1 bitscore=73.6 evalue=3.0E-11 perc\_ident=100.0 perc\_conserv=100.0 perc\_gaps=0.0  
 query\_cvg=100.0 subj\_cvg=100.0 alpha=74.74 beta=6 prob=0.9979976037761628  
 GTGATAAGCGCAGTGATTTTCGCAAAACATTGCCATTCCCTGCTCTGGCGCAATATTCAT  
 TCTTATTTTCGCGTTGATTCACGAACTGTTAATTACATATTCACGGTGGCAAAAAATATA  
 AAACCACATTTTTAG  
 >AA QryID: NC\_000913\_(-)\_4244482\_4244601 HitID: NC\_017663\_(-)\_4555892\_4556011  
 rank=1 bitscore=63.5 evalue=1.0E-8 perc\_ident=97.44 perc\_conserv=100.0 perc\_gaps=0.0  
 query\_cvg=100.0 subj\_cvg=100.0 alpha=97.44 beta=1 prob=0.9979975638337861  
 ATGTGCGCATCTCCACATTACCGCCAATTCTGTAACAGAGATCACACAAAGCGACGGTGG  
 GGCGTAGGGGCAAGGAGGATGGAAAGAGGTTGCCGTATAAAGAACTAGAGTCCGTTTAG  
 >AA QryID: NC\_000913\_(-)\_2920217\_2920342 HitID: NC\_017651\_(-)\_3085547\_3085672  
 rank=1 bitscore=81.3 evalue=7.0E-14 perc\_ident=100.0 perc\_conserv=100.0 perc\_gaps=0.0  
 query\_cvg=100.0 subj\_cvg=100.0 alpha=61.73 beta=10 prob=0.9979975241676802  
 ATGCCAAAATCGGGCCTCATTGAACGCATTAATGTTGTGTTGTTGCACGGTGAGCCGCTA

TGGCGCGCTTTTTATACTGCTATTGCCAGATATAAACACGCGCCGTATTCGGCGAACGAC  
CTATAA

>AA QryID: NC\_000913\_(+)\_2967444\_2967605 HitID: NC\_017641\_(+)\_3395995\_3396156  
rank=1 bitscore=95.9 eval=5.0E-18 perc\_ident=100.0 perc\_cons=100.0 perc\_gaps=0.0  
query\_cvg=100.0 subj\_cvg=100.0 alpha=80.23 beta=15 prob=0.9979974207830294

ATGGAAACAGTAGTGGAGGTTTTTCACAGTTATCCCAGCTTCTGTGGATAACATGGTGT  
AAGATCCTGTTTATTTTCAGTGACCAGATTTGGAAAACCCGTTGCAGTGTTGCGCAACTC  
GATTACCGGCAACCTAAAAAGCAATATAAATCAGAGAATTGA

>AA QryID: NC\_000913\_(-)\_4044745\_4044987 HitID: NC\_009801\_(-)\_4371935\_4372177  
rank=1 bitscore=143.0 eval=4.0E-32 perc\_ident=98.75 perc\_cons=100.0 perc\_gaps=0.0  
query\_cvg=100.0 subj\_cvg=100.0 alpha=76.49 beta=35 prob=0.997997162262257

ATGTCCGTGCCTGTTTATTCAGATTATGGGTAAAGGATGCCACAGACAGGATGAAAACATG  
AGTTTTTCACCGCTTTTCGTGAAAATCTTTTGATAGATCTTCTGGATCGCTCGCAAATCGT  
CATGTGGATAACTTTGTGCATAAATTATTTACATCGCTTTTAATTTATTATCATGCTTTT  
TACAGCATGATGTTTGTCTTTGTTTTTCATGCAGTTAAAAATAAATCCATCCCTAATAAT  
TGA

>AA QryID: NC\_000913\_(-)\_2149055\_2149165 HitID: NC\_009800\_(-)\_2195272\_2195382  
rank=1 bitscore=64.3 eval=1.0E-8 perc\_ident=100.0 perc\_cons=100.0 perc\_gaps=0.0  
query\_cvg=100.0 subj\_cvg=100.0 alpha=100.0 beta=1 prob=0.9979971486538753

GTGGAAGTTAATCATTATCAGGCCGAAATTGAATTGTATCCTGATAAAATTGCATTATCA  
TTTTTATTCTTGAGTGGGTTTTCCCATATAGAAATAATTTTAATGGTTAG

>AA QryID: NC\_000913\_(-)\_1525588\_1525734 HitID: NC\_009801\_(-)\_1627539\_1627685  
rank=1 bitscore=78.6 eval=9.0E-13 perc\_ident=100.0 perc\_cons=100.0 perc\_gaps=0.0  
query\_cvg=100.0 subj\_cvg=100.0 alpha=100.0 beta=7 prob=0.9979970316795543

ATGCAAAGTCAAACCAATATTCATAATGTCTTTTATTCACAACAATAAATAATTCAATA  
ACAATCATTGAAATGAATGATGGTTTGTATAAGGAATATACGCTACCGCCCCACCCTGAT  
AACATGATCTGCACATTGCCATCTTAA

>AA QryID: NC\_000913\_(-)\_3939573\_3939686 HitID: NC\_013008\_(-)\_4794132\_4794245  
rank=1 bitscore=62.4 eval=4.0E-8 perc\_ident=97.3 perc\_cons=97.3 perc\_gaps=0.0  
query\_cvg=100.0 subj\_cvg=100.0 alpha=97.3 beta=1 prob=0.9979969553735206

GTGCCGCTTTGCTTTTCTCAGCGCGCGGGGTGTGCATAATACGCTTTCCCGCTACAGA  
GTCAAGCATTATTTTGTCTTCTCTGCCGGAGTTCTCAGGAGAACCCCGCTGA

>AA QryID: NC\_000913\_(-)\_312591\_312710 HitID: NC\_020163\_(-)\_1025499\_1025618  
rank=1 bitscore=69.7 eval=2.0E-10 perc\_ident=100.0 perc\_cons=100.0 perc\_gaps=0.0  
query\_cvg=100.0 subj\_cvg=100.0 alpha=72.13 beta=5 prob=0.9979968946075191

ATGATGAGATGCGATATGCTCCTCAGCACCAATCAACGCCCGGACTGGGCCAGTCTTGAG  
ATCAGACTCATTCCCGGAACTGACTTCAGGCGACATATCAATGACGTTGGTGCAATAA

>AA QryID: NC\_000913\_(+)\_3752494\_3752613 HitID: NC\_013008\_(+)\_4554950\_4555069  
rank=1 bitscore=56.6 eval=2.0E-6 perc\_ident=87.18 perc\_cons=92.31 perc\_gaps=0.0  
query\_cvg=100.0 subj\_cvg=100.0 alpha=87.18 beta=1 prob=0.9979966843273071

ATGAAATGCCATGATGCAGTGCAATTTCTTATTTATATAACGACATATTGTTTTTTATA  
TACTTTCTTAAATGTGCTGTCTGGTTTTTCAACAGGACGAGGTTTATCATATTGAAATAG

>AA QryID: NC\_000913\_(-)\_3265702\_3265839 HitID: NC\_009801\_(-)\_3602557\_3602694  
rank=1 bitscore=64.3 eval=2.0E-8 perc\_ident=100.0 perc\_cons=100.0 perc\_gaps=0.0  
query\_cvg=100.0 subj\_cvg=100.0 alpha=77.72 beta=3 prob=0.9979961406741116

ATGCTTATTTTCTCGCAGGGTTCTTTCGCACTATCAAAAACGCTCATTACCCGCGCT  
TACAGTAAACGAAGCAACATTCTGTGGCCTACGCCGATCAAAAGCTCTGTGAAAATTTC  
CTTGTTGTCTTTGTCTGA

>AA QryID: NC\_000913\_(+)\_3698294\_3698410 HitID: NC\_017641\_(+)\_4190385\_4190501  
rank=1 bitscore=62.0 eval=5.0E-8 perc\_ident=100.0 perc\_cons=100.0 perc\_gaps=0.0  
query\_cvg=100.0 subj\_cvg=100.0 alpha=77.54 beta=2 prob=0.9979960892309463

TTGCCGCTGATTCTACGATTGCTTTTTACTGTCAGCACCCGGCAATCTTCCTCATTGCGC  
GATGCCTTCCAGCTTAATTTCTTTATTTGCAATAGTTGCAGTTCATATCCGGGCTGA

>AA QryID: NC\_000913\_(-)\_3628688\_3628828 HitID: NC\_017641\_(-)\_4120489\_4120602  
rank=1 bitscore=57.8 eval=2.0E-6 perc\_ident=100.0 perc\_cons=100.0 perc\_gaps=0.0  
query\_cvg=80.43 subj\_cvg=100.0 alpha=90.22 beta=4 prob=0.9979959308338656

GTGTTTCATTTACGGCCAGGAATGCTGATGATGACAACATTACTACCCGTTTTCTACTAAG  
CCTTCCCCGTTGGCGCTCAATGCTCTGCGCGCTGGTCGATTTGCCGTTTCTTCTTATC  
CCGGATGGAAGAATCCGCTGA

>AA QryID: NC\_000913\_(-)\_1031203\_1031343 HitID: NC\_017652\_(-)\_1042400\_1042540  
rank=1 bitscore=70.1 eval=3.0E-10 perc\_ident=97.83 perc\_cons=97.83 perc\_gaps=0.0  
query\_cvg=100.0 subj\_cvg=100.0 alpha=97.83 beta=5 prob=0.9979959266475051

TTGCGACACCGGCAGGACACCGGGCGCTTATGGTCGGCAAGCGACGTCCCTGTAGCAAGG  
CAAACCATCGCTTCACGTGAGATGCTGAAAACGAAAGCTCATCCTTCTGCACTGGCGCAC  
GTCGCCAGAAAGTATTGTAA

>AA QryID: NC\_000913\_(+)\_2683633\_2683809 HitID: NC\_008253\_(+)\_2691007\_2691183  
rank=1 bitscore=78.6 evalue=9.0E-13 perc\_ident=100.0 perc\_conserv=100.0 perc\_gaps=0.0  
query\_cvg=100.0 subj\_cvg=100.0 alpha=100.0 beta=8 prob=0.9979959019576108  
TTGACAAAGGAATTTACGCAAACGATTACCTTCAGGCTACGCAAGGCTTTGGAGAATAAA  
GAGCTTGCAACCGGAAACGGATTCTTTTCAGGTTTGTGATGCAAATTTTCACTTCATC  
ACATTCTTTCTGAAAAACACCAAAGAACCATTACATTGCAGGGCTATTTTTTATAA

>AA QryID: NC\_000913\_(-)\_4091036\_4091146 HitID: NC\_009801\_(-)\_4420895\_4421005  
rank=1 bitscore=59.3 evalue=3.0E-7 perc\_ident=100.0 perc\_conserv=100.0 perc\_gaps=0.0  
query\_cvg=100.0 subj\_cvg=100.0 alpha=73.5 beta=1 prob=0.9979958171295622  
TTGCCAATGTGCCAGAGATGCCTCCGGCACAAATATTTTAAATTTTCGATTTGAAAAATTA  
AACATATTACATCTCCCGGTAAGTTATATTTCCCTGATACATTGTGAGTAA

>AA QryID: NC\_000913\_(+)\_2627565\_2627711 HitID: NC\_012947\_(-)\_1245735\_1245881  
rank=1 bitscore=61.2 evalue=1.0E-7 perc\_ident=100.0 perc\_conserv=100.0 perc\_gaps=0.0  
query\_cvg=100.0 subj\_cvg=100.0 alpha=100.0 beta=1 prob=0.9979956910344902  
TTGGGATTATCAAAGCGGCAGATATTCTTTCATCTTAAATTTTACGTCTTATCCTGACT  
GATGTTTATCCTGTTTGGCTGCGAAATAAATAAAATTAATATATATGTTGTAATGATA  
TATTTTTATAAATTATCCCTGCGTGA

>AA QryID: NC\_000913\_(-)\_4033296\_4033409 HitID: NC\_013008\_(-)\_4794132\_4794245  
rank=1 bitscore=59.7 evalue=2.0E-7 perc\_ident=97.3 perc\_conserv=97.3 perc\_gaps=0.0  
query\_cvg=100.0 subj\_cvg=100.0 alpha=97.3 beta=1 prob=0.99799569039389  
GTGCCGCTTCGCTTTTTCTCAGCGGCGCGGGGTGTGCATAATACGCCTTCCCGCTACAGA  
GTCAAGCATTATTTTTGCTTCTCTGCCGGAGTTCTCAGGAGAACCCCGCTGA

>AA QryID: NC\_000913\_(-)\_4164424\_4164537 HitID: NC\_013008\_(-)\_4794132\_4794245  
rank=1 bitscore=59.7 evalue=2.0E-7 perc\_ident=97.3 perc\_conserv=97.3 perc\_gaps=0.0  
query\_cvg=100.0 subj\_cvg=100.0 alpha=97.3 beta=1 prob=0.99799569039389  
GTGCCGCTTCGCTTTTTCTCAGCGGCGCGGGGTGTGCATAATACGCCTTCCCGCTACAGA  
GTCAAGCATTATTTTTGCTTCTCTGCCGGAGTTCTCAGGAGAACCCCGCTGA

>AA QryID: NC\_000913\_(+)\_1114743\_1114847 HitID: NC\_009801\_(+)\_1192984\_1193088  
rank=1 bitscore=63.5 evalue=1.0E-8 perc\_ident=100.0 perc\_conserv=100.0 perc\_gaps=0.0  
query\_cvg=100.0 subj\_cvg=100.0 alpha=100.0 beta=2 prob=0.9979956696562573  
GTGAACATAAGAAGAAAAGATAAGCACACTAATTATGCGCCCGACTTCCAGGGGGCGCAA  
TCCAGAGAGCTTTTATCGCTAAATCAGGGGGATTGCTGTGGTAA

>AA QryID: NC\_000913\_(-)\_812337\_812474 HitID: NC\_017328\_(-)\_768901\_769038  
rank=1 bitscore=82.8 evalue=5.0E-14 perc\_ident=100.0 perc\_conserv=100.0 perc\_gaps=0.0  
query\_cvg=100.0 subj\_cvg=100.0 alpha=100.0 beta=10 prob=0.9979956579511406  
TTGCATTTATCTAACCAGTTAAAAAATAAAAGATATTTCTTTGAGCCGTCTTTAACGCCA  
ATTCGCGTGCAAGCCGCGTATTCTCTCGCTTGCCTCGTGTCTTCTAACTCTAATACACAT  
GGTTATCCACAGGAATAG

>AA QryID: NC\_000913\_(+)\_2212755\_2212883 HitID: NC\_011353\_(+)\_2891223\_2891351  
rank=1 bitscore=62.0 evalue=5.0E-8 perc\_ident=97.62 perc\_conserv=100.0 perc\_gaps=0.0  
query\_cvg=100.0 subj\_cvg=100.0 alpha=97.62 beta=2 prob=0.9979956176068143  
GTGAGTACGATCACTCAAATCGCCTGGCAAAAATAAAATCACCTATAGATGCACAAAA  
AACGGGCAAAACTACCTGTTTCGCAAACTGCGTCTAAAGTTAAACCGGGACCTCGCGAG  
CAAGGGTGA

>AA QryID: NC\_000913\_(-)\_237140\_237289 HitID: NC\_009800\_(-)\_236738\_236887  
rank=1 bitscore=58.2 evalue=1.0E-6 perc\_ident=97.96 perc\_conserv=97.96 perc\_gaps=0.0  
query\_cvg=100.0 subj\_cvg=100.0 alpha=74.13 beta=1 prob=0.9979955846812237  
TTGATAACGGACTCTAATTATATACCTCACTTAAATAATAACAAACAAATCAATTTGAA  
ATATACATTCATTTAATCAATATAAATTTATTCTCTAGAAATATATTTAAGCTGAATGGT  
TCGATATCATTATTGAATTTAATGAATGA

>AA QryID: NC\_000913\_(+)\_4537763\_4537891 HitID: NC\_011353\_(+)\_5468295\_5468423  
rank=1 bitscore=59.3 evalue=3.0E-7 perc\_ident=97.62 perc\_conserv=97.62 perc\_gaps=0.0  
query\_cvg=100.0 subj\_cvg=100.0 alpha=97.62 beta=1 prob=0.9979954781285105  
ATGTTTCGTAAGCTATATCACTTACTCAATCCATTTTACCCAGAGTCATAAAATAGAATGT  
CTGTTGATCTCATTTTCATATTCCTTTCAGACTGAAGTGCGTTTTCATCACCCGATGAGA  
AAGAACTGA

>AA QryID: NC\_000913\_(+)\_1391003\_1391128 HitID: NC\_017656\_(+)\_1706598\_1706723  
rank=1 bitscore=70.5 evalue=1.0E-10 perc\_ident=90.24 perc\_conserv=90.24 perc\_gaps=0.0  
query\_cvg=100.0 subj\_cvg=100.0 alpha=63.09 beta=9 prob=0.997995474844487

ATGGCGACAGATGCTGATTATGATACCGAAAACGGGTTTGAACGTGCGAAGCCCCGAACGT  
 AGTGTTCGGAGTTCTATGTGCTTTACCGCATTTTGGAGACTATTATTACTAAATCTG  
 ATTTGA  
 >AA QryID: NC\_000913\_(-)\_2986272\_2986403 HitID: NC\_017635\_(-)\_3178351\_3178482  
 rank=1 bitscore=64.3 eval=1.0E-8 perc\_ident=100.0 perc\_cons=100.0 perc\_gaps=0.0  
 query\_cvg=100.0 subj\_cvg=100.0 alpha=71.19 beta=4 prob=0.9979954521575259  
 ATGTTGCAACGTAAACCTTTACGTAAATTAACATGGTTAACATTTATGCCACTATTGTTT  
 GTAAATTCATATTCGTAATGCTTCTGAATTTTCGTGTGATGGTTTTAAATACTATGGT  
 GTTACTCTTGA  
 >AA QryID: NC\_000913\_(+)\_3838114\_3838233 HitID: NC\_017625\_(-)\_43552\_43671  
 rank=1 bitscore=70.9 eval=1.0E-10 perc\_ident=100.0 perc\_cons=100.0 perc\_gaps=0.0  
 query\_cvg=100.0 subj\_cvg=100.0 alpha=72.37 beta=7 prob=0.9979953757733274  
 GTGGAATATAAAGTCTGGCACTTCTTACTGACCACGCAAGCGCGTTTCGTACAGCATGAT  
 GAGAGCGATGAAAGCAAACCTACACTTATGCTTCATTCGATACACATTTGTAAAAGGTTGA  
 >AA QryID: NC\_000913\_(+)\_3882239\_3882346 HitID: NC\_017663\_(+)\_4192046\_4192153  
 rank=1 bitscore=58.9 eval=4.0E-7 perc\_ident=100.0 perc\_cons=100.0 perc\_gaps=0.0  
 query\_cvg=100.0 subj\_cvg=100.0 alpha=100.0 beta=1 prob=0.9979949593598629  
 GTGTACAATTATTACAATCCGGCCTCTTTAATCACCCATGGCTTCGGTGTCCATCGTTTC  
 ATTTTTCGGCGGATATCCAATAAAGCCATTGAATTTATTCAAGTTTAG  
 >AA QryID: NC\_000913\_(-)\_4077032\_4077136 HitID: NC\_009800\_(-)\_4105917\_4106021  
 rank=1 bitscore=63.2 eval=2.0E-8 perc\_ident=100.0 perc\_cons=100.0 perc\_gaps=0.0  
 query\_cvg=100.0 subj\_cvg=100.0 alpha=77.83 beta=4 prob=0.9979949104902236  
 ATGAATTATGGGTGCTATGAATATATTATTCAGAGATATTTATTTGCATAATCTGAAT  
 GGTGTAGCCGAAAAACGTCAGCATCCTAACAGCACCAGGATTTAA  
 >AA QryID: NC\_000913\_(+)\_3769793\_3769885 HitID: NC\_009801\_(+)\_4084932\_4085024  
 rank=1 bitscore=60.8 eval=1.0E-7 perc\_ident=100.0 perc\_cons=100.0 perc\_gaps=0.0  
 query\_cvg=100.0 subj\_cvg=100.0 alpha=100.0 beta=2 prob=0.9979948601353199  
 GTGTTGTTTTTGGGCTGGCAGCCAGAAGGGAGTCAGGCTGATATTTGACAATAATCCGG  
 GTTCGCGATTCTCGCCATAACACCAAAGAATAA  
 >AA QryID: NC\_000913\_(-)\_3984173\_3984310 HitID: NC\_011353\_(-)\_4882887\_4883024  
 rank=1 bitscore=67.8 eval=1.0E-9 perc\_ident=100.0 perc\_cons=100.0 perc\_gaps=0.0  
 query\_cvg=100.0 subj\_cvg=100.0 alpha=82.11 beta=6 prob=0.9979948298779326  
 ATGATAAAATTCATTCAATTAATAACACATATTAATTGCCGTTAAACTAAAAACAGC  
 ATCAATAATCAACGCGATATAATAAACCTGCCTTACATATCAACTGCGCCAGAGGTAGGA  
 TTGAAAACGCTCTCCTGA  
 >AA QryID: NC\_000913\_(+)\_1276867\_1277085 HitID: NC\_017625\_(-)\_2600616\_2600834  
 rank=1 bitscore=140.0 eval=1.0E-31 perc\_ident=100.0 perc\_cons=100.0 perc\_gaps=0.0  
 query\_cvg=100.0 subj\_cvg=100.0 alpha=78.77 beta=36 prob=0.9979948172898279  
 ATGAGCAATAACCTTAATGAATGTGACGATACATTCTGGAATGGCAGTATTCTCGGCTAT  
 TGGCTGAAGTATACCCATACCCGGAAGAGTTACTCCTTATTTGCCGTGTGGTTAGTCGC  
 TTTACATCGGTAAGGGTAGGGATTTACAGCACCGTGAAAAATCTCATAATTTTATGAA  
 GTCACTGTACTCACTATGGGTAATGATAAATATCAATGA  
 >AA QryID: NC\_000913\_(-)\_453441\_453572 HitID: NC\_009800\_(-)\_520282\_520413  
 rank=1 bitscore=74.7 eval=7.0E-12 perc\_ident=100.0 perc\_cons=100.0 perc\_gaps=0.0  
 query\_cvg=100.0 subj\_cvg=100.0 alpha=81.3 beta=9 prob=0.9979948059821977  
 ATGAAGTTTACTGATTTAAAGATTGAAACACAGGCCTCGCATCAGTGTTCCTTTACCAG  
 GGGCGATTATTTTCGTCAACATGATGAATTTACATGCCTTACCCACTTCCCCTCGCCGTTG  
 GCAATGTTATGA  
 >AA QryID: NC\_000913\_(-)\_1891885\_1892016 HitID: NC\_017646\_(-)\_2112791\_2112922  
 rank=1 bitscore=58.9 eval=4.0E-7 perc\_ident=88.37 perc\_cons=90.7 perc\_gaps=0.0  
 query\_cvg=100.0 subj\_cvg=100.0 alpha=89.23 beta=4 prob=0.9979947641207033  
 GTGTTATCCAGTAAGATGGAGAAATTTAACGGTCAGTCCGCACGCTATAACCAGATTGTT  
 CAGCTAAGAAAGAAAACCAGAGTTGCTAATCAAAGGGCGAACACAACGGCATGTTTATGT  
 TTATTTATATAG  
 >AA QryID: NC\_000913\_(-)\_1160807\_1160977 HitID: NC\_010658\_(+)\_2019961\_2020131  
 rank=1 bitscore=93.2 eval=4.0E-17 perc\_ident=100.0 perc\_cons=100.0 perc\_gaps=0.0  
 query\_cvg=100.0 subj\_cvg=100.0 alpha=77.04 beta=17 prob=0.9979947455482483  
 TTGCTGCCGTATATATCGCCATTATTCCCATTTCTGCCTGCGAATGCGCTGAAAAGACAT  
 TCTCTGTTTGGTTTACATGACAAATATGAATGCGTATATTTCTCATTTGCATTTACAAAC  
 AAAATTATTCGCACACTAAATATAATCGCTCATCACCTCCTCCGGCATGA  
 >AA QryID: NC\_000913\_(+)\_3904656\_3904778 HitID: NC\_009801\_(+)\_4223402\_4223524



rank=1 bitscore=70.9 evalue=9.0E-11 perc\_ident=100.0 perc\_conserv=100.0 perc\_gaps=0.0  
query\_cvg=100.0 subj\_cvg=100.0 alpha=73.04 beta=8 prob=0.997994728086394  
TTGCCTGCGAATGCAGTAACAATCCAGTCATTTATTAATGGTTTTTATAACGAACATCCA  
GGTTCGGAAATTAATTTAATTGCGTGCAGAGAAAATAGCAATGCGCTATTGATAAAAATA  
TGA  
>AA QryID: NC\_000913\_(-)\_1993622\_1993750 HitID: NC\_009801\_(-)\_2122419\_2122547  
rank=1 bitscore=74.3 evalue=9.0E-12 perc\_ident=100.0 perc\_conserv=100.0 perc\_gaps=0.0  
query\_cvg=100.0 subj\_cvg=100.0 alpha=100.0 beta=8 prob=0.9979946815094807  
TTGTTTTTTGAGCGTGATATCGGCAGTGCTATAAAATACGTTAATATAATGACCAATAAA  
TATTTTTATCATGAATGTTTTTTGCCCGTATTGTTCCGGTTAATTAATGTTACATATTCA  
GCGGGCTGA  
>AA QryID: NC\_000913\_(+)\_3399217\_3399405 HitID: NC\_011748\_(+)\_3750824\_3751012  
rank=1 bitscore=108.0 evalue=9.0E-22 perc\_ident=100.0 perc\_conserv=100.0 perc\_gaps=0.0  
query\_cvg=100.0 subj\_cvg=100.0 alpha=100.0 beta=22 prob=0.9979946175583984  
GTGCAGTTCGTTTCCTTTGTTACAAATCTCTGCCTGAGTCCAGAAAGGCTTAATGCATCA  
GCAGCATTCCTCGCCTGTTTGCAACCGCGTAAGGTCATTCATCTGCATATGTGCTGCAAC  
AATCTGGCGAGCAGACAAGCACACTCCCATGAGACGCAGCGCGCATTATTCTACGTGAAA  
ACGGATTAA  
>AA QryID: NC\_000913\_(+)\_3717222\_3717371 HitID: NC\_017651\_(+)\_4029288\_4029437  
rank=1 bitscore=53.1 evalue=3.0E-5 perc\_ident=67.35 perc\_conserv=67.35 perc\_gaps=0.0  
query\_cvg=100.0 subj\_cvg=100.0 alpha=67.35 beta=3 prob=0.9979946120633316  
TTGTTAAAAAATGATAGTGCCGTTGCCTTTTTTTGTAGCCAGAGATTACGCCTTCGCAGA  
AGGTTAGATTTTCGAAATCTTTACAAAACAGGAGTGGTAAGAGATATATCGGCATTTATC  
AGATCGTTAGGTGGCTATAAGTCACGCTAA  
>AA QryID: NC\_000913\_(+)\_2925778\_2925909 HitID: NC\_017644\_(+)\_2893347\_2893478  
rank=1 bitscore=62.0 evalue=5.0E-8 perc\_ident=90.7 perc\_conserv=93.02 perc\_gaps=0.0  
query\_cvg=100.0 subj\_cvg=100.0 alpha=95.35 beta=5 prob=0.9979946080541888  
ATGTTTCTTACCACCCTCACGCGACAAATATCATCACAGTTAATATGTCATACAATTTAT  
GTTGCAACGCAAACGTTTCCCTATTTTCATAAACCGTATTTTATCGCTATGAAAAAGAAA  
TTATCGCCATGA  
>AA QryID: NC\_000913\_(-)\_1976252\_1976350 HitID: NC\_009801\_(-)\_2105825\_2105923  
rank=1 bitscore=59.3 evalue=3.0E-7 perc\_ident=100.0 perc\_conserv=100.0 perc\_gaps=0.0  
query\_cvg=100.0 subj\_cvg=100.0 alpha=100.0 beta=2 prob=0.997994535583796  
GTGGTTCTGCTTATTGCAGCTTATCGCAACTATTCTAATGCTAATTATTTTTTACCGGGG  
CTTCCCGGCGACATCACGGGGTGCGGTGAAACCGCATAA  
>AA QryID: NC\_000913\_(-)\_1986004\_1986117 HitID: NC\_017631\_(-)\_2135278\_2135391  
rank=1 bitscore=55.1 evalue=5.0E-6 perc\_ident=94.59 perc\_conserv=100.0 perc\_gaps=0.0  
query\_cvg=100.0 subj\_cvg=100.0 alpha=75.81 beta=1 prob=0.9979945277641877  
TTGATTATCATTTTTATAACATTAAAGGGGTATTTATGTGATTTGTATCACATAAAGATT  
GATTTTTGTGATGGTTGTCATATTATAAGCGCAAAGACAATAACACCTGTATAA  
>AA QryID: NC\_000913\_(+)\_347728\_347826 HitID: NC\_009801\_(+)\_384584\_384682  
rank=1 bitscore=55.5 evalue=4.0E-6 perc\_ident=96.88 perc\_conserv=96.88 perc\_gaps=0.0  
query\_cvg=100.0 subj\_cvg=100.0 alpha=96.88 beta=1 prob=0.9979945119671679  
ATGAAACGCGGTGAAACATTGCCTGAAACGTTAAACTGAAACGCATATTTGCGGATTAGTT  
CATGACTTTATCTCTAACAATTGAAATTAACATTTAA  
>AA QryID: NC\_000913\_(-)\_770163\_770267 HitID: NC\_009800\_(-)\_797793\_797897  
rank=1 bitscore=58.9 evalue=4.0E-7 perc\_ident=100.0 perc\_conserv=100.0 perc\_gaps=0.0  
query\_cvg=100.0 subj\_cvg=100.0 alpha=100.0 beta=2 prob=0.9979944610036118  
GTGAGTTATAAGGCTGAAATTAGTTTCGGTTGGCAATTAAAGATAAAAAGAGACGAAGCA  
AAAACAGCACGGTTGACCTTAATTCTTTTTTTGGTCACTGGCTAA  
>AA QryID: NC\_000913\_(-)\_2083584\_2083697 HitID: NC\_010498\_(+)\_1066986\_1067099  
rank=1 bitscore=54.3 evalue=1.0E-5 perc\_ident=94.59 perc\_conserv=97.3 perc\_gaps=0.0  
query\_cvg=100.0 subj\_cvg=100.0 alpha=94.59 beta=1 prob=0.9979944551417748  
ATGAACATTTGGCTCCGGTTTTTTTATTCTTTTGTATCGAACTCCTCATTAATAACCAT  
TGTTCTAATTTAGAGAATTTGGTTATTGGTCTGCATTCCACCAGTCATGAATAA  
>AA QryID: NC\_000913\_(+)\_2817278\_2817394 HitID: NC\_017646\_(+)\_3174125\_3174241  
rank=1 bitscore=69.3 evalue=3.0E-10 perc\_ident=100.0 perc\_conserv=100.0 perc\_gaps=0.0  
query\_cvg=100.0 subj\_cvg=100.0 alpha=75.26 beta=8 prob=0.9979943784322741  
ATGGCATTACATTCTGTTAAACCTAAGTTTAGCCGATATACACAACTTCAACCTGACTTT  
ATCGTTGTCGATAGCGTTAATGCGAATGCCGTGAAGCGAGTCCACGGCATTGCCTGA  
>AA QryID: NC\_000913\_(+)\_3210888\_3211010 HitID: NC\_013008\_(+)\_4011521\_4011643

rank=1 bitscore=74.3 evalue=9.0E-12 perc\_ident=100.0 perc\_conserv=100.0 perc\_gaps=0.0  
 query\_cvg=100.0 subj\_cvg=100.0 alpha=100.0 beta=9 prob=0.9979942871968177  
 GTGCCGAAGAGCGATCGGGAAGCCCCGACAGCCGCACTGAGAGGCAGCGGCAAATATAT  
 AAGTACGCCCTCGTAATTATCGTTGGCGGTAAACAACCGTTGGATTTCAGCGTTAACGGC  
 TGA  
 >AA QryID: NC\_000913\_(+)\_1525601\_1525714 HitID: NC\_017641\_(+)\_1767634\_1767747  
 rank=1 bitscore=54.3 evalue=9.0E-6 perc\_ident=97.3 perc\_conserv=97.3 perc\_gaps=0.0  
 query\_cvg=100.0 subj\_cvg=100.0 alpha=97.3 beta=1 prob=0.997994237785609  
 GTGCAGATCATGTTATCAGGGTGGGGCGGTAGCGTATATTCCTTATACAAACCATCATTC  
 ATTTCAATGATTGTTATTGAATTATTTATTGTTGTGAATAAAAAGACATTATGA  
 >AA QryID: NC\_000913\_(+)\_1349078\_1349176 HitID: NC\_009801\_(+)\_1482781\_1482879  
 rank=1 bitscore=57.4 evalue=1.0E-6 perc\_ident=100.0 perc\_conserv=100.0 perc\_gaps=0.0  
 query\_cvg=100.0 subj\_cvg=100.0 alpha=100.0 beta=2 prob=0.9979942188344448  
 TTGTTGATGCTTGTGTTGTCCTGAAAATCAGGCGATTCTCGTTTTAGTAAACAGTACGAA  
 CAGATAAACGGTTATTATAATCAACCTGGCTGTGAGTAG  
 >AA QryID: NC\_000913\_(-)\_1948736\_1948831 HitID: NC\_009800\_(-)\_1969883\_1969978  
 rank=1 bitscore=57.4 evalue=1.0E-6 perc\_ident=100.0 perc\_conserv=100.0 perc\_gaps=0.0  
 query\_cvg=100.0 subj\_cvg=100.0 alpha=100.0 beta=2 prob=0.9979942188344448  
 GTGCCTCACACCTTAATGCGATTAGCCGATGGCGGAACGACAAATTTGTTAATTTTTAT  
 GAGTTCGGGCAACACCTTTATAGCAAACCTGGCGTAG  
 >AA QryID: NC\_000913\_(-)\_3245636\_3245749 HitID: NC\_010498\_(-)\_3477676\_3477792  
 rank=1 bitscore=54.7 evalue=8.0E-6 perc\_ident=97.22 perc\_conserv=97.22 perc\_gaps=0.0  
 query\_cvg=97.3 subj\_cvg=94.74 alpha=93.35 beta=1 prob=0.9979941905181845  
 ATGCACTACCGCAATGTTATTGCTGTTTTGGTATGTTCTGCGGGTTTGATACATCAACAC  
 AGCCTGAACTATTCCTGTAAATCGTGAGATAAGAAAGCATTCAAAAACATAA  
 >AA QryID: NC\_000913\_(-)\_3698275\_3698436 HitID: NC\_009800\_(-)\_3729723\_3729884  
 rank=1 bitscore=90.5 evalue=2.0E-16 perc\_ident=100.0 perc\_conserv=100.0 perc\_gaps=0.0  
 query\_cvg=100.0 subj\_cvg=100.0 alpha=100.0 beta=16 prob=0.997994188718062  
 TTGCGCATTTCACTACCAGTCTGGAGTCAGCCCGGATATGAACTGCAACTATTGCAAATA  
 AAGAAATTAAGCTGGAAGGCATCGCGCAATGAGGAAGATTGCCGGGTGCTGACAGTAAAA  
 AGCAATCGTAGAATCAGCGGCAAGCCGGAAAGGTTCCGGTGA  
 >AA QryID: NC\_000913\_(+)\_986529\_986657 HitID: NC\_011415\_(+)\_1071255\_1071410  
 rank=1 bitscore=62.8 evalue=3.0E-8 perc\_ident=95.12 perc\_conserv=95.12 perc\_gaps=0.0  
 query\_cvg=97.62 subj\_cvg=80.39 alpha=96.43 beta=2 prob=0.9979941046731353  
 TTGTTTCTGATGGAACTTTATCGACCTGGCACAAAATCTTCTTTCAGACATCCAGAATG  
 CCAAAAAATAGTATGAAAATTGTGCTATTAGCTAAGAAAAAACTAATCCGCAATAAGAAT  
 GCGGATTAG  
 >AA QryID: NC\_000913\_(-)\_3268064\_3268180 HitID: NC\_020163\_(-)\_4036264\_4036380  
 rank=1 bitscore=70.5 evalue=1.0E-10 perc\_ident=97.37 perc\_conserv=97.37 perc\_gaps=0.0  
 query\_cvg=100.0 subj\_cvg=100.0 alpha=74.26 beta=10 prob=0.9979940968370145  
 ATGACTGTCCACGACGCTATACCCAAAAGAAAGCGGCTTATCGGTCAGTTTCACCTGGTT  
 TACGTAAAAACCCGCTTCGGCGGGTTTTGCTTTTGAGGGGCAGAAAGATGAATGA  
 >AA QryID: NC\_000913\_(+)\_3117285\_3117467 HitID: NC\_017652\_(+)\_3404748\_3404948  
 rank=1 bitscore=92.4 evalue=7.0E-17 perc\_ident=96.67 perc\_conserv=96.67 perc\_gaps=0.0  
 query\_cvg=100.0 subj\_cvg=90.91 alpha=100.0 beta=16 prob=0.997994023337484  
 ATGTCTATCTGGCTATTTTTACGAAATTTCAACAAACAAAAATTAACAACATTTACAA  
 CGTAACTATATAAATTTGTTGGTAGTTTTAACGATTAAGATTGCAAAAGCAACAGATAGA  
 ACGGTGTTTGCTCATCAAGCGAACATAATTAATACAGACTTGTTTTGCGTGATAAAAAAA  
 TAG  
 >AA QryID: NC\_000913\_(-)\_3267951\_3268067 HitID: NC\_017641\_(-)\_3756388\_3756504  
 rank=1 bitscore=68.6 evalue=5.0E-10 perc\_ident=97.37 perc\_conserv=97.37 perc\_gaps=0.0  
 query\_cvg=100.0 subj\_cvg=100.0 alpha=65.74 beta=10 prob=0.9979939789939309  
 ATGACTGTCCACGACACTATACCCAAAAGAAAGCGGCTTATCGGTCAGTTTCACCTGTTT  
 TACGTAAAAACCCGCTTCGGCGGGTTTTACTTTTGAGGGGCAGAAAGATGAATGA  
 >AA QryID: NC\_000913\_(+)\_29474\_29611 HitID: NC\_011353\_(+)\_33849\_33986  
 rank=1 bitscore=72.0 evalue=8.0E-11 perc\_ident=100.0 perc\_conserv=100.0 perc\_gaps=0.0  
 query\_cvg=100.0 subj\_cvg=100.0 alpha=69.18 beta=11 prob=0.997993968139657  
 ATGCATGAGCCACAAAATAATATAAAAAATCCCGCCATTAAGTTGACTTTTAGCGCCCAT  
 ATCTCCAGAATGCCGCCGTTTGCCAGAAATTCGTCGGTAAGCAGATTTGCATTGATTAC  
 GTCATCATTGTGAATTAA  
 >AA QryID: NC\_000913\_(+)\_4311075\_4311179 HitID: NC\_017660\_(-)\_398603\_398707

rank=1 bitscore=53.5 evalue=2.0E-5 perc\_ident=100.0 perc\_conserv=100.0 perc\_gaps=0.0  
query\_cvg=100.0 subj\_cvg=100.0 alpha=100.0 beta=1 prob=0.9979939676370273  
ATGCTGGCGACTTCACAAAAAATAAAATTTATAAAGTTTATTTTATTGTGAACAATGGC  
GAGTGGCTTAAATTTTATTTTCATTTAATTAGTTTAAAAACATGA  
>AA QryID: NC\_000913\_(-)\_3978790\_3978888 HitID: NC\_009800\_(-)\_4009180\_4009278  
rank=1 bitscore=55.1 evalue=5.0E-6 perc\_ident=96.88 perc\_conserv=100.0 perc\_gaps=0.0  
query\_cvg=100.0 subj\_cvg=100.0 alpha=78.27 beta=2 prob=0.9979939412426332  
ATGCTTTCCGGTGTTACCGGTTATCGTTATGGGTACATCGAGTGTTGCAAATGTTTTCGT  
AATTCAGGAGAAATGGCAAATAAAGCATTAAAAATTTGA  
>AA QryID: NC\_000913\_(-)\_3999300\_3999434 HitID: NC\_016825\_(+)\_104704\_104838  
rank=1 bitscore=53.1 evalue=4.0E-5 perc\_ident=100.0 perc\_conserv=100.0 perc\_gaps=0.0  
query\_cvg=100.0 subj\_cvg=100.0 alpha=100.0 beta=1 prob=0.9979939202073584  
ATGCTTAAATATCGGACAGTTCGGTGGGCACACAGAAACAAATTGGGTTTCAGACCATT  
AAACAGCCTGACTCAGCGCGACGGGAAAAATTGAGGTCGCTGACAACCGCTAAGGCTATC  
AGCAAAAAGGGATAG  
>AA QryID: NC\_000913\_(+)\_2354758\_2354883 HitID: NC\_010468\_(-)\_1539659\_1539784  
rank=1 bitscore=85.1 evalue=4.0E-15 perc\_ident=100.0 perc\_conserv=100.0 perc\_gaps=0.0  
query\_cvg=100.0 subj\_cvg=100.0 alpha=69.58 beta=17 prob=0.997993887156836  
ATGTGGTTACCGGGCATTTTTGCGTACACGATTCCGTGCCCAATGTATGCGTTGCAACGC  
AGTGAAAATTCCTCTGAAAACGTCTCGCAAAGGCTGAAACTGGCAGATGTCAAAGGCCTG  
GGATAA  
>AA QryID: NC\_000913\_(-)\_4538190\_4538327 HitID: NC\_011741\_(-)\_4600787\_4600948  
rank=1 bitscore=74.7 evalue=1.0E-11 perc\_ident=97.73 perc\_conserv=97.73 perc\_gaps=0.0  
query\_cvg=97.78 subj\_cvg=83.02 alpha=100.0 beta=8 prob=0.997993877149425  
GTGAAACATCATCCTGAAAACACCAACATCAACAAGCCTCTCCAGATCGACTTCAGAAGT  
GACCAGTTACAAGCCACAAACCAGGAAACATATTTTCATGATGAGAATTATGCTCAGCCTG  
ATGGCGGGTAAACACTGA  
>AA QryID: NC\_000913\_(+)\_4554677\_4554820 HitID: NC\_010658\_(-)\_4461173\_4461316  
rank=1 bitscore=73.6 evalue=2.0E-11 perc\_ident=97.87 perc\_conserv=97.87 perc\_gaps=0.0  
query\_cvg=100.0 subj\_cvg=100.0 alpha=100.0 beta=11 prob=0.9979938687237806  
ATGGCTGATTATGCGGAAATAAATAATTTCCACCGGAATTAAGTAGCAGCGGTGACAAG  
TATTTTCATCTACGTAATTCGGAATATTCAGAATATACTAGCGGTTTTTTTTTGAGT  
TTGATGATTTTTATCAAATCATGA  
>AA QryID: NC\_000913\_(+)\_3544473\_3544565 HitID: NC\_009800\_(+)\_3590792\_3590884  
rank=1 bitscore=54.3 evalue=1.0E-5 perc\_ident=100.0 perc\_conserv=100.0 perc\_gaps=0.0  
query\_cvg=100.0 subj\_cvg=100.0 alpha=100.0 beta=2 prob=0.9979938616100085  
GTGGGTATCAGTCGTGGTGCCGCAATATCTCTGTTCCCGATTGGGATAATTAGAGTTTGT  
CGTCAGAAAATTGACGTTACCCATAACAAATGA  
>AA QryID: NC\_000913\_(+)\_1710310\_1710510 HitID: NC\_017664\_(+)\_1855149\_1855349  
rank=1 bitscore=103.0 evalue=2.0E-20 perc\_ident=100.0 perc\_conserv=100.0 perc\_gaps=0.0  
query\_cvg=100.0 subj\_cvg=100.0 alpha=80.53 beta=24 prob=0.9979938479768912  
ATGCAGGTTAATTGTTTTTTAATAGCGAAATTTCTATTCATTCGTGATCAAGATCACG  
ATGCTGTGCAATGTAAAAACATTGCAAGAATCAGGTAAATCATTTAAATTTACACAC  
GCAACAAATATTGACCTACAAAACATTACACTGGCTATTTTTCAGAAACTGGAATATCTC  
ACTAGTAAAAACGCTAAATAG  
>AA QryID: NC\_000913\_(+)\_931342\_931455 HitID: NC\_017641\_(+)\_994695\_994808  
rank=1 bitscore=67.0 evalue=1.0E-9 perc\_ident=100.0 perc\_conserv=100.0 perc\_gaps=0.0  
query\_cvg=100.0 subj\_cvg=100.0 alpha=100.0 beta=8 prob=0.9979938465704294  
ATGACGATTTTGTAAACAATTTGTGCAATCGGCAGCATCGATAAGCAGGTCAAATTCTCC  
CGTCATTATCACCTCTGCTACTTAAATTTCCCGCTTTATAAGCCGATTAAATGA  
>AA QryID: NC\_000913\_(-)\_1777428\_1777604 HitID: NC\_018661\_(+)\_2406738\_2406914  
rank=1 bitscore=95.9 evalue=5.0E-18 perc\_ident=100.0 perc\_conserv=100.0 perc\_gaps=0.0  
query\_cvg=100.0 subj\_cvg=100.0 alpha=100.0 beta=20 prob=0.9979938391094558  
ATGGAAGGTAAAAATGGCCTGAAAATAGTGTGCGATAGCGGTGCGGGTTTTTCGACGGAG  
CAAGCTGTTTTCTTGCCAACAATCTTGCAAAAAAATGCGATCGCTAAAACAAAAGTGC  
AATTTGCGGCAATATAGTTATTCCATGACCGTACAATCTTGCAATTCAGTGTAATAA  
>AA QryID: NC\_000913\_(-)\_1333556\_1333681 HitID: NC\_020163\_(-)\_2102430\_2102555  
rank=1 bitscore=70.9 evalue=9.0E-11 perc\_ident=100.0 perc\_conserv=100.0 perc\_gaps=0.0  
query\_cvg=100.0 subj\_cvg=100.0 alpha=75.69 beta=11 prob=0.9979938383920322  
ATGATCCAGAGGAGTTCGGCCCCAGAAGAGCATCGACAGAGAAAACGCGCCCATCCAGGAC  
CAATATTTTCATATTTGTGTTGATCATAGGCTACACCCTTAACGGTTATTATTTTGTGTTG  
AGATAA

>AA QryID: NC\_000913\_(-)\_702883\_703017 HitID: NC\_004431\_(-)\_736394\_736528  
 rank=1 bitscore=77.4 eval=2.0E-12 perc\_ident=97.73 perc\_cons=100.0 perc\_gaps=0.0  
 query\_cvg=100.0 subj\_cvg=100.0 alpha=65.06 beta=15 prob=0.9979938115633888  
 GTGCTTTTTGTGAGTTTTGTCACCAAATATCGTTATTATCACTCCCTTTTACTGGCTAAA  
 CCAGAAACTTATTTTATCATTCAAAAAATCAGGTCGGATTGACGCCTGTCTGCGCAAAT  
 CCAGGTTACGCTTAA  
 >AA QryID: NC\_000913\_(-)\_1732207\_1732359 HitID: NC\_017638\_(-)\_1716365\_1716517  
 rank=1 bitscore=62.4 eval=6.0E-8 perc\_ident=100.0 perc\_cons=100.0 perc\_gaps=0.0  
 query\_cvg=100.0 subj\_cvg=100.0 alpha=81.86 beta=7 prob=0.9979938040038903  
 TTGTTAAAAAATACGTTTCGTTGGCGAGCGCAAAAAAATGCAGCAGTGAAAGCTAAAAAT  
 GGTATAAATACGCCAGTTTGCCGGCATCAGAGAAGAAACGAATATTTGAAATGCAACAA  
 ATAGACAAAGGGATAAAATAGCAAAAGCGTGA  
 >AA QryID: NC\_000913\_(-)\_1718873\_1718992 HitID: NC\_017651\_(-)\_1823824\_1823943  
 rank=1 bitscore=61.2 eval=7.0E-8 perc\_ident=100.0 perc\_cons=100.0 perc\_gaps=0.0  
 query\_cvg=100.0 subj\_cvg=100.0 alpha=100.0 beta=6 prob=0.9979937814440598  
 GTGCGAAAAATTTACGCGCAATTTCTGAAAAATATGTCTGACGGTAACCAAATGCAGCAA  
 TACATTTGTTTTAGCAATACAATTGCTGCACACTATTCTAAAAGCCGCATAATATCTTAG  
 >AA QryID: NC\_000913\_(-)\_2063940\_2064062 HitID: NC\_017651\_(-)\_2261858\_2261980  
 rank=1 bitscore=68.9 eval=4.0E-10 perc\_ident=97.5 perc\_cons=97.5 perc\_gaps=0.0  
 query\_cvg=100.0 subj\_cvg=100.0 alpha=97.5 beta=10 prob=0.9979937751761613  
 TTGCTGGTTGTTCCGGCAGTAGCATTAAATCATTATCTGAATGAAATGTGTCAATCCACA  
 GAAACCGCTGTCAATGACGCATTTTGTCTGGACGTTAACACGAGAAAGTCTGGCTATTCCG  
 TAA  
 >AA QryID: NC\_000913\_(+)\_3303855\_3303992 HitID: NC\_011740\_(+)\_3225573\_3225725  
 rank=1 bitscore=68.9 eval=6.0E-10 perc\_ident=91.11 perc\_cons=95.56 perc\_gaps=0.0  
 query\_cvg=100.0 subj\_cvg=90.0 alpha=97.78 beta=9 prob=0.9979937651979054  
 GTGAAAAATAGTGCGACTGCGTTGTTATGCATTGCACTGTACCAGTACACGAGTACAAAA  
 GACAGAAAAAAGCCCCGATGGTAAAAATCGGGGCTGTATATATTATTTTACAGATTGTG  
 TTCGCTGTTTCAGCGATGA  
 >AA QryID: NC\_000913\_(-)\_1891769\_1891906 HitID: NC\_017638\_(-)\_1877126\_1877263  
 rank=1 bitscore=53.5 eval=3.0E-5 perc\_ident=80.0 perc\_cons=80.0 perc\_gaps=0.0  
 query\_cvg=100.0 subj\_cvg=100.0 alpha=80.0 beta=5 prob=0.9979937184952907  
 ATGTTTATGTTTATTTATATAGTTAGTTTATAGATAAAATTGAAATTATAAATATAAAT  
 AATGAATTAGCAGAAGCATCAACAGTAATATCTTATTCTCTGGTCGATTTATGTAAACC  
 GACCAGTATTATCGATAA  
 >AA QryID: NC\_000913\_(-)\_1102886\_1103080 HitID: NC\_009800\_(-)\_1166559\_1166753  
 rank=1 bitscore=92.8 eval=5.0E-17 perc\_ident=100.0 perc\_cons=100.0 perc\_gaps=0.0  
 query\_cvg=100.0 subj\_cvg=100.0 alpha=100.0 beta=20 prob=0.9979937092091071  
 ATGGAAAGTATGTCTGCGGAAATATTTTAATAACTACCCGCGCGTTGATTTTTCTTT  
 TTTAGTTCATACCAAAGTATTAACCCACGTAAATACGCTGTTATCTACGCAAAAAAAT  
 ATTTTGTTCCTTTTAAATCTCCGTTTTCCGCTATCAAAAAGCACCAGACAGTCATTCTT  
 CTTGCCCCGTCGCTGA  
 >AA QryID: NC\_000913\_(-)\_707256\_707366 HitID: NC\_009800\_(-)\_738387\_738497  
 rank=1 bitscore=52.4 eval=3.0E-5 perc\_ident=100.0 perc\_cons=100.0 perc\_gaps=0.0  
 query\_cvg=100.0 subj\_cvg=100.0 alpha=100.0 beta=2 prob=0.9979937074885568  
 TTGTTACAAGGCTTAAGTTTGCGGTTGAAAGGCTTGCAAGAATAAAAGCGTGAAATTC  
 CAGCAAGATGAAAGCGGTTACATTTATTTAATTATGTTTTGTTATTTTAA  
 >AA QryID: NC\_000913\_(-)\_4199714\_4199842 HitID: NC\_009801\_(-)\_4538717\_4538845  
 rank=1 bitscore=69.3 eval=3.0E-10 perc\_ident=97.62 perc\_cons=97.62 perc\_gaps=0.0  
 query\_cvg=100.0 subj\_cvg=100.0 alpha=100.0 beta=11 prob=0.9979936896426722  
 ATGACTCGCTACCCGCGAGCGAGTCATTTTACTCGTTTATCATGCCAGATTACCCG  
 TCATATCAGCGTTTCATCGTTGGCACGGAAGATGCAATACCCGAAGTAAGACAACCACTG  
 GAGGATTAA  
 >AA QryID: NC\_000913\_(-)\_2651718\_2651834 HitID: NC\_017641\_(-)\_3065664\_3065780  
 rank=1 bitscore=67.4 eval=1.0E-9 perc\_ident=100.0 perc\_cons=100.0 perc\_gaps=0.0  
 query\_cvg=100.0 subj\_cvg=100.0 alpha=72.09 beta=11 prob=0.9979936836404683  
 TTGACAAAAAGAGAGTTACTGGCGAGTATTGTCTCCGCTGAGACGCGCTTGCACTACTAC  
 GGTAAATACAACCTGCTGGAAAGGCCGCGAACCAGCAACAAAAAACCGCCTGA  
 >AA QryID: NC\_000913\_(-)\_1744353\_1744448 HitID: NC\_009801\_(-)\_1872147\_1872242  
 rank=1 bitscore=52.0 eval=5.0E-5 perc\_ident=100.0 perc\_cons=100.0 perc\_gaps=0.0  
 query\_cvg=100.0 subj\_cvg=100.0 alpha=100.0 beta=2 prob=0.9979936793915098  
 GTGACAACGGGGACGAATATTAGCGGCAGAGTGGGAAGGTGGCAAGAGGCAAAACGTAAT

TTTCTGCGCTATTTTCGACCGTTTGCAGAGCTTTTAA  
>AA QryID: NC\_000913\_(+)\_400451\_400564 HitID: NC\_011353\_(+)\_464582\_464704  
rank=1 bitscore=54.7 evalue=7.0E-6 perc\_ident=91.89 perc\_conserv=94.59 perc\_gaps=0.0  
query\_cvg=100.0 subj\_cvg=92.5 alpha=100.0 beta=4 prob=0.9979936687747427  
GTGGGTAATTATTTAAATAAGAGAAACGTTTCGCTGGTAATCAAACAAAAAATATTTGCG  
CAAAGTATTTCTTTGTCATAAAAAATAACTTCCAGACACTATGAAGTTGTGA  
>AA QryID: NC\_000913\_(-)\_1108209\_1108352 HitID: NC\_017644\_(-)\_1146429\_1146572  
rank=1 bitscore=87.4 evalue=2.0E-15 perc\_ident=100.0 perc\_conserv=100.0 perc\_gaps=0.0  
query\_cvg=100.0 subj\_cvg=100.0 alpha=75.69 beta=20 prob=0.9979936574290964  
TTGCCAGCAAATTTATTTATCAACCGTCTTACAGACGCTTCCATTCTGGTTAGTGGTAGC  
GATGATGCTATGCATAAAAAACCTTGAAGCCTGCGCCTGGCGCGGTCAGGTCGGTGTCACT  
ATGGCAACAAGCCTAAAGGCATAA  
>AA QryID: NC\_000913\_(-)\_3595691\_3595819 HitID: NC\_017644\_(-)\_3654618\_3654731  
rank=1 bitscore=55.1 evalue=5.0E-6 perc\_ident=91.67 perc\_conserv=94.44 perc\_gaps=0.0  
query\_cvg=85.71 subj\_cvg=97.3 alpha=83.88 beta=9 prob=0.997993652607105  
GTGCCGTTATTTTATGCTGACAAAGGCACTTTTTTCTGTTTATCTATCAATAAATTCAGA  
ATATTATCTGTTCTTAATCGACTGAAAAATAGGGATTTTAATCGCTATTATCACAAAATA  
CTGCGCTAA  
>AA QryID: NC\_000913\_(+) \_1823784\_1823885 HitID: NC\_009800\_(+) \_1843842\_1843943  
rank=1 bitscore=51.6 evalue=6.0E-5 perc\_ident=100.0 perc\_conserv=100.0 perc\_gaps=0.0  
query\_cvg=100.0 subj\_cvg=100.0 alpha=100.0 beta=2 prob=0.9979936525363279  
TTGCGCCAATTATGGAGAAAAAAGAAAATTTGATGGAGAGTGATGAGAGAATATTACAA  
CACGATGATTTTGCAGAGATTATGAAGAACTATACCGGATGA  
>AA QryID: NC\_000913\_(-)\_2244884\_2244988 HitID: NC\_009800\_(-)\_2289089\_2289193  
rank=1 bitscore=57.4 evalue=1.0E-6 perc\_ident=100.0 perc\_conserv=100.0 perc\_gaps=0.0  
query\_cvg=100.0 subj\_cvg=100.0 alpha=100.0 beta=6 prob=0.9979936354745325  
TTGATAATTGTTATCGTTTGCATTATCGTTACGCCGCAATCAAAAAAGGCTGACAAATCA  
GAGGCTGTTCCGGCTTTCTGGGATGATCACCTGCATAAAAAAATAA  
>AA QryID: NC\_000913\_(+) \_4205673\_4205795 HitID: NC\_017641\_(+) \_4726125\_4726247  
rank=1 bitscore=67.4 evalue=1.0E-9 perc\_ident=95.0 perc\_conserv=97.5 perc\_gaps=0.0  
query\_cvg=100.0 subj\_cvg=100.0 alpha=95.0 beta=12 prob=0.9979936306308397  
TTGCGCAACGCTCGCGAATTTTCTCTTTCAATGGTGATCACATTTTGA CTGTGGTTAC  
CGTGGGCAAAATACAGAAATTACATTGATGATTGTGGATAACTCTGTGCGTAAAAAGGTA  
TAA  
>AA QryID: NC\_000913\_(-)\_4336084\_4336188 HitID: NC\_009800\_(-)\_4362082\_4362186  
rank=1 bitscore=50.1 evalue=2.0E-4 perc\_ident=100.0 perc\_conserv=100.0 perc\_gaps=0.0  
query\_cvg=100.0 subj\_cvg=100.0 alpha=100.0 beta=1 prob=0.9979936296505357  
TTGCTGCAAACAAAATGTCATACTTTTTGCGCGGCCCCACCCCGCGCTTTTTTTTGCCT  
GTTATTTATCCTGTAAAAAATATGTACATGAGAAATTACTATAA  
>AA QryID: NC\_000913\_(+) \_3595610\_3595756 HitID: NC\_017652\_(+) \_3907137\_3907283  
rank=1 bitscore=61.2 evalue=1.0E-7 perc\_ident=95.83 perc\_conserv=97.92 perc\_gaps=0.0  
query\_cvg=100.0 subj\_cvg=100.0 alpha=95.83 beta=9 prob=0.9979936282670286  
GTGTTGCTTTGTTTTATGTGTTAACAAATCAGACTGTTCTTTTTTATACTGCACTGTT  
TTTGCTGTCTGATTAAGGGTTAGCGCAGTATTTTGTGATAATAGCGATTAAATCCCT  
ATTTTTAGTCGATTAAAGAACAGATAA  
>AA QryID: NC\_000913\_(-)\_1671632\_1671802 HitID: NC\_016902\_(+) \_2285796\_2285966  
rank=1 bitscore=90.9 evalue=2.0E-16 perc\_ident=100.0 perc\_conserv=100.0 perc\_gaps=0.0  
query\_cvg=100.0 subj\_cvg=100.0 alpha=77.46 beta=22 prob=0.9979936260569089  
GTGTTCAACTACCGAGGACAATTATCATCCGCGATGACGAGAAGCAACACTGCGGATAAT  
TGTAATATTATGGACAATTTGTTACAGGACGTTATTTTCTACATTTACCCATCTTCGTACC  
TCATCCACTATCTTGCTCGTAGGTGAGCAGCACTGGCGCAACGCGCTTTAG  
>AA QryID: NC\_000913\_(-)\_3530467\_3530595 HitID: NC\_011741\_(-)\_3598376\_3598522  
rank=1 bitscore=73.9 evalue=1.0E-11 perc\_ident=97.62 perc\_conserv=97.62 perc\_gaps=0.0  
query\_cvg=100.0 subj\_cvg=87.5 alpha=71.86 beta=13 prob=0.9979936179233877  
ATGAAATTGATGCAAATCAACCGGTAAAGTATCGATTCAACACGCTAACTTTTTTTGAT  
TATTTTCTGAAAAAAGCAAATACTACTGCCCGGATGCGATAATTAACCCACCTTTTGAT  
TCTGGATAA  
>AA QryID: NC\_000913\_(-)\_34086\_34265 HitID: NC\_017641\_(-)\_37343\_37522  
rank=1 bitscore=113.0 evalue=3.0E-23 perc\_ident=100.0 perc\_conserv=100.0 perc\_gaps=0.0  
query\_cvg=100.0 subj\_cvg=100.0 alpha=100.0 beta=30 prob=0.9979936167659101  
ATGACTCGTTTTGAAGCAATTAAACAAGGCCATATTAATTTGTGGATATATCGATAGTA  
TGCAACTTCACCGTCGATAAGTGTGAGCTAAATCCTGCTTATGTCATCAAAAATATCGAT

TCCCCAAAAGATTTACTTAATGGGCAAAAAAACGGTCCTCATCAGAGAACCGTATTAG  
>AA QryID: NC\_000913\_(-)\_2967352\_2967498 HitID: NC\_013361\_(-)\_3857866\_3858012  
rank=1 bitscore=95.5 eval=7.0E-18 perc\_ident=100.0 perc\_cons=100.0 perc\_gaps=0.0  
query\_cvg=100.0 subj\_cvg=100.0 alpha=63.24 beta=25 prob=0.9979936155273434  
ATGTTATCCACAGAAAGCTGGGATAACTGTGAAAAACCTCCACTACTGTTTCCATTTACA  
GCCTTGACGTGCGACGAACTCCAGTTTTAGTGGTTCAGTGCTTAAGTTAGTGGCACAT  
TCTGTGGATAAATACGGCATTGGTTGA  
>AA QryID: NC\_000913\_(-)\_1339786\_1339932 HitID: NC\_011415\_(-)\_1404828\_1404974  
rank=1 bitscore=80.1 eval=3.0E-13 perc\_ident=97.92 perc\_cons=97.92 perc\_gaps=0.0  
query\_cvg=100.0 subj\_cvg=100.0 alpha=98.96 beta=17 prob=0.997993613687292  
TTGATGATGGGCACCGGAAGTGGCGCGAAACAGGTAAACGGCGAGCATTCTACCCGTGGA  
AATAAAAAATTAACAGTTGCGATTTCTCCCTGGCAGGCTTTTTCTGCGCCGTCGTTGCC  
GGAGCACAATGGAACATTAATAATTAG  
>AA QryID: NC\_000913\_(-)\_2531521\_2531649 HitID: NC\_017651\_(-)\_2751466\_2751594  
rank=1 bitscore=75.5 eval=4.0E-12 perc\_ident=100.0 perc\_cons=100.0 perc\_gaps=0.0  
query\_cvg=100.0 subj\_cvg=100.0 alpha=77.53 beta=16 prob=0.9979936096238844  
GTGTTGACCGCTGACGTTTCGTACGTCATTAAACATTATGCCGCTAAAGGAAGAATTGAA  
CCAAATCATAAATCGATTCAGCTTTGGCTTTTCTGTAAACGATTAAATTCGCGCATCAA  
AATAATTAG  
>AA QryID: NC\_000913\_(-)\_3467960\_3468118 HitID: NC\_017651\_(-)\_3772384\_3772542  
rank=1 bitscore=57.8 eval=2.0E-6 perc\_ident=96.15 perc\_cons=98.08 perc\_gaps=0.0  
query\_cvg=100.0 subj\_cvg=100.0 alpha=96.15 beta=8 prob=0.9979935921560056  
TTGCATTTGTTGACGGCATATCTTATTCGTACTGTCAGAACGAATAAATTATTCATATTT  
AAAATATCAATTCAATTTAACATTTAAATATGAATGTTTCTGTTTTTAAATGCTTCAT  
TTGTCAGGCTTTTTTCTTATTTTAAATGCCGTAATTTAA  
>AA QryID: NC\_000913\_(+)\_4095550\_4095699 HitID: NC\_011353\_(+)\_5000600\_5000749  
rank=1 bitscore=103.0 eval=3.0E-20 perc\_ident=100.0 perc\_cons=100.0 perc\_gaps=0.0  
query\_cvg=100.0 subj\_cvg=100.0 alpha=77.57 beta=28 prob=0.9979935919478957  
ATGGGCCATTGGCAACCAGGGAAAGATGAACGTGATGATGTTTCAATTTGCTGAATTGT  
GGTGATGTGATGCTCACCGCATTTCTGAAAATTCACGCTGTATCTTGAAAAATCGACGT  
TTTTTACGTGGTTTTCCGTCGAAAATTTAA  
>AA QryID: NC\_000913\_(-)\_707189\_707299 HitID: NC\_016822\_(-)\_677671\_677781  
rank=1 bitscore=53.9 eval=1.0E-5 perc\_ident=100.0 perc\_cons=100.0 perc\_gaps=0.0  
query\_cvg=100.0 subj\_cvg=100.0 alpha=100.0 beta=5 prob=0.9979935830684774  
ATGAAAGCGGTTACATTTTATTTAATTATGTTTTGTTATTTTAAATTTATTTTATGGATA  
AATTGCGAAGCGGAATTAATTCGCGAAGAAAAGCAGAAAAAACGCCGCTGA  
>AA QryID: NC\_000913\_(+)\_1218517\_1218660 HitID: NC\_009800\_(+)\_1267743\_1267886  
rank=1 bitscore=59.7 eval=4.0E-7 perc\_ident=100.0 perc\_cons=100.0 perc\_gaps=0.0  
query\_cvg=100.0 subj\_cvg=100.0 alpha=100.0 beta=9 prob=0.9979935744081404  
TTGTCAACCTGGTGTTATCACGGTTGTTTTATATACACCGAAATAATCCTCATCGCA  
ACTATTAACAATTTGATGTGCAAGAGTTATTTGTTAAACAAAATCGTCACCTCAAAGTG  
ATCAATGTCATGAAAATAAGGTGA  
>AA QryID: NC\_000913\_(-)\_1840244\_1840363 HitID: NC\_011353\_(-)\_2348026\_2348139  
rank=1 bitscore=48.9 eval=4.0E-4 perc\_ident=100.0 perc\_cons=100.0 perc\_gaps=0.0  
query\_cvg=94.87 subj\_cvg=100.0 alpha=97.44 beta=2 prob=0.9979935727460982  
GTGCTTATGTTGTTTATGTCATGTGCTTTTGCAGTTTTCGACTATACCATCAAGAATGTG  
ACGGTAAGCAAGAAAAAATGACCCAGGAAAGCAAATTAATAACGAGAGTAATCTCATAA  
>AA QryID: NC\_000913\_(+)\_3273138\_3273257 HitID: NC\_017641\_(+)\_3761462\_3761581  
rank=1 bitscore=62.8 eval=2.0E-8 perc\_ident=100.0 perc\_cons=100.0 perc\_gaps=0.0  
query\_cvg=100.0 subj\_cvg=100.0 alpha=81.43 beta=11 prob=0.9979935680662986  
TTGCGCTTTACCTTACCGGGCGGCACTGCAATCCCTGAAATGATTGACATTGATCACATT  
TCTGCGTTTAACTCCTGACATTCTTATTTACCCAATGAAGTCATTTATTTTAAATGA  
>AA QryID: NC\_000913\_(-)\_3595735\_3595872 HitID: NC\_009801\_(-)\_3914765\_3914902  
rank=1 bitscore=74.7 eval=1.0E-11 perc\_ident=97.78 perc\_cons=97.78 perc\_gaps=0.0  
query\_cvg=100.0 subj\_cvg=100.0 alpha=97.78 beta=17 prob=0.9979935634118504  
ATGAAAAATGTCCAGCATAATCCCCTGAATGATAGTGAATTATTCGCCCTTTGTGCCGT  
TATTTTATGCTGACAAAGGCACTTTTTTCTGTTTATCTATCAATAAATTCAGAATATTAT  
CTGTTCTTAATCGACTGA  
>AA QryID: NC\_000913\_(-)\_2463055\_2463225 HitID: NC\_009800\_(-)\_2506653\_2506823  
rank=1 bitscore=95.1 eval=1.0E-17 perc\_ident=100.0 perc\_cons=100.0 perc\_gaps=0.0  
query\_cvg=100.0 subj\_cvg=100.0 alpha=100.0 beta=25 prob=0.9979935618547315  
TTGCCTTTTTCTGTTTCTATAGAATCAAGTAGCCTACAGGGCGGCGATTACCAGGCTATG

ATCAAATCAGCAAATCAGGGCGTCTGGACATCAGTTGACGTGCTGTTACAATCGCCCACA  
CCTAAACAGGCGGATACGGTATCGTTCCGTCATGGATGGCAAACCTGCATAA  
>AA QryID: NC\_000913\_(+)\_2796932\_2797060 HitID: NC\_009800\_(+)\_2816353\_2816481  
rank=1 bitscore=55.5 eval=5.0E-6 perc\_ident=90.48 perc\_cons=92.86 perc\_gaps=0.0  
query\_cvg=100.0 subj\_cvg=100.0 alpha=90.48 beta=8 prob=0.9979935618254006  
GTGATATTAAAGGTAAGGCCATATCTAATTGATTAAATTAATAAATCATATCGGCAT  
GTAAAAATCCACAATGTACAAAAAACGAGCCGTTACGGAATATTTTATCTACAAAAACTG  
ACTAAATAA  
>AA QryID: NC\_000913\_(+)\_2920336\_2920464 HitID: NC\_004431\_(+)\_3197131\_3197259  
rank=1 bitscore=59.3 eval=3.0E-7 perc\_ident=100.0 perc\_cons=100.0 perc\_gaps=0.0  
query\_cvg=100.0 subj\_cvg=100.0 alpha=100.0 beta=10 prob=0.9979935539553972  
TTGGCATTAGCCCTGGACGGTGAATCCACTTCACGGAATGAAAACAAGAACAAGAAAG  
GAAGGTTAAACGAAGAAATAAAGAAGAGTATGAAATGGATCGCTTGACTCCAGGCAAA  
CGCCAGTAA  
>AA QryID: NC\_000913\_(-)\_4173236\_4173391 HitID: NC\_002655\_(-)\_5052976\_5053131  
rank=1 bitscore=85.9 eval=6.0E-15 perc\_ident=100.0 perc\_cons=100.0 perc\_gaps=0.0  
query\_cvg=100.0 subj\_cvg=100.0 alpha=100.0 beta=22 prob=0.9979935529116379  
ATGGAGACATGCGAGTTCATGCAACTAAAAAATTGCATAATTTGTTTTATTGGTCACATT  
TTATGCGACACGATGAAGAAACAGCCGAACGGAGGGCAGATTAGCACACTTTTTCAACAT  
CATTGTGCTCAACAATGCGCTCCTGCTAAACCATAA  
>AA QryID: NC\_000913\_(-)\_848304\_848402 HitID: NC\_009801\_(-)\_897114\_897212  
rank=1 bitscore=50.8 eval=1.0E-4 perc\_ident=100.0 perc\_cons=100.0 perc\_gaps=0.0  
query\_cvg=100.0 subj\_cvg=100.0 alpha=100.0 beta=3 prob=0.9979935519049273  
ATGCAGAATTTCTCGCTACTTTCTCTACACCGTCTTTATATATCGAATTATGCAAAAG  
CATATTTATTCGAAAATTCCTGGCGAGCAGATAAATAA  
>AA QryID: NC\_000913\_(+)\_1500330\_1500449 HitID: NC\_009800\_(+)\_1522736\_1522855  
rank=1 bitscore=59.3 eval=3.0E-7 perc\_ident=100.0 perc\_cons=100.0 perc\_gaps=0.0  
query\_cvg=100.0 subj\_cvg=100.0 alpha=71.6 beta=7 prob=0.9979935501046289  
ATGATTGACTTAGCCCTTTTTTCGGCATTGACTATGTCGTCTGAAAAGGGGCTGAAAAT  
TTATTTTACCAACACTTTTTTTGCCACAACACGAAGCGGCGCTTTTTGCTATAACTTAG  
>AA QryID: NC\_000913\_(-)\_2780813\_2780932 HitID: NC\_010498\_(-)\_2856313\_2856432  
rank=1 bitscore=62.0 eval=5.0E-8 perc\_ident=100.0 perc\_cons=100.0 perc\_gaps=0.0  
query\_cvg=100.0 subj\_cvg=100.0 alpha=100.0 beta=12 prob=0.9979935489224816  
ATGCCTCATTCTTATGCGGAATATCATTTTCATCATGATGTCTTTGATGAGCGGTGAA  
CACAATACACTTTCGCTGTCTCTTCAGGATGAATCCCCTGGTCTGGTGCCTGTGGGCTGA  
>AA QryID: NC\_000913\_(-)\_1934354\_1934479 HitID: NC\_011750\_(+)\_1267264\_1267416  
rank=1 bitscore=58.5 eval=5.0E-7 perc\_ident=92.68 perc\_cons=95.12 perc\_gaps=0.0  
query\_cvg=100.0 subj\_cvg=82.0 alpha=61.44 beta=4 prob=0.9979935462654259  
TTGCGCGCTTTTCCCGTAATCGCACGGGTGGATAAGCGTTTACAGTTTTCGCAAGCTCGT  
AAAAGCAGTACAGTGACCGTAAGAAAATTACAAGTATACCCTGGCTTAAGTACCGGGTT  
AGTTAA  
>AA QryID: NC\_000913\_(-)\_3530537\_3530668 HitID: NC\_004337\_(-)\_3501801\_3501932  
rank=1 bitscore=71.6 eval=7.0E-11 perc\_ident=100.0 perc\_cons=100.0 perc\_gaps=0.0  
query\_cvg=100.0 subj\_cvg=100.0 alpha=100.0 beta=18 prob=0.9979935400938758  
GTGGAAAATGTTCTCAAAGGTTAAATCTTGTTTATATGGCGGAATATTGTGAGTGGA  
ATCGCATTCCTGAATGAAATTGATGCAAATTCAACCGGTAAAGTATCGATTCACCACGCT  
AACTTTTTTTGA  
>AA QryID: NC\_000913\_(-)\_4292296\_4292427 HitID: NC\_011415\_(-)\_4566118\_4566249  
rank=1 bitscore=75.1 eval=5.0E-12 perc\_ident=100.0 perc\_cons=100.0 perc\_gaps=0.0  
query\_cvg=100.0 subj\_cvg=100.0 alpha=73.07 beta=21 prob=0.9979935389577259  
GTGTTGCGTTGGTTTGTAGATTTTTTAAACGCTTATGATCAGTATCATTTGCGCGGTATG  
TTGCGCAACCCTTTAACAACAGAGCTTTTCGCTGCATTAATGCATAATAACGCGAGTTTA  
TGGCAGGATTAA  
>AA QryID: NC\_000913\_(-)\_1507145\_1507267 HitID: NC\_009800\_(-)\_1529551\_1529673  
rank=1 bitscore=60.8 eval=9.0E-8 perc\_ident=100.0 perc\_cons=100.0 perc\_gaps=0.0  
query\_cvg=100.0 subj\_cvg=100.0 alpha=100.0 beta=13 prob=0.9979935381026177  
GTGTTTACCTCCGTGTGTAATTTGCTCGAAAATAGCACTAAATCGCCGCAACGGCAGAAT  
GCAATGCAAAATCAGGAAGGAAGATTCCAGAATTTCTTTGCGCTAATTTGCAAAACTGAA  
TAA  
>AA QryID: NC\_000913\_(-)\_418621\_418770 HitID: NC\_009801\_(-)\_452272\_452421  
rank=1 bitscore=87.8 eval=1.0E-15 perc\_ident=100.0 perc\_cons=100.0 perc\_gaps=0.0  
query\_cvg=100.0 subj\_cvg=100.0 alpha=100.0 beta=26 prob=0.99799353632191

GTGCCAATCCCTGGGGATGATACAGCGGTATATTTAAACAATTTTAGCGGGAAATACTCC  
CAACCAGGCGCGGCGAAGAATAGTTTTTCGATTTACCGCGTTAATGCAGTCAGTATGACA  
GCACCTGAAGCGCAATTTAAACGCTTATAA

>AA QryID: NC\_000913\_(-)\_1096975\_1097088 HitID: NC\_017328\_(-)\_1130150\_1130263  
rank=1 bitscore=64.3 eval=8.0E-9 perc\_ident=100.0 perc\_cons=100.0 perc\_gaps=0.0  
query\_cvg=100.0 subj\_cvg=100.0 alpha=100.0 beta=16 prob=0.9979935352926184  
GTGCGAAATTTATTCGCACTTATCGTTATGATCTACAAAGGCCACCAGCATAACAAATCC  
GTGGTCGGTGGCAAAAAAAGCAGATTTTCGCTTATTTAAACCACACATTGATTGA

>AA QryID: NC\_000913\_(+)\_1078160\_1078369 HitID: NC\_017906\_(+)\_1321696\_1321905  
rank=1 bitscore=101.0 eval=1.0E-19 perc\_ident=100.0 perc\_cons=100.0 perc\_gaps=0.0  
query\_cvg=100.0 subj\_cvg=100.0 alpha=100.0 beta=32 prob=0.997993535130572  
ATGATGTTGCAACTTTGTGCAACCATGTTAAATGTGACATGCGTAGCAAGCTTAAAAATG  
AATGAAATGTTAATAAAAGAAATCGATATGACAGGGATTAAAAAAATAACTCAGACTTTT  
TCTCTGCGGCAGTTAACATTTTTGAAAGGTGCAACCGCAAAAAATGTGAGAGAGTGAAC  
CTGATGAAAAATAGTGTCTGCTGAGCACTAA

>AA QryID: NC\_000913\_(+)\_688304\_688420 HitID: NC\_011415\_(+)\_772773\_772895  
rank=1 bitscore=55.8 eval=3.0E-6 perc\_ident=86.49 perc\_cons=89.19 perc\_gaps=0.0  
query\_cvg=97.37 subj\_cvg=92.5 alpha=82.11 beta=9 prob=0.9979935348871944  
TTGCTGTTTTATTGTTTGTGTTTTCGAGATGCGCCGACCATTCCGAAGCAAAATTCTTA  
AAATGCACTCTTTAGTGCTACCGCTGGATTACTGTGGTGCAACTAGGTTGTACTGA

>AA QryID: NC\_000913\_(-)\_2411223\_2411354 HitID: NC\_017664\_(-)\_2561425\_2561556  
rank=1 bitscore=78.2 eval=6.0E-13 perc\_ident=100.0 perc\_cons=100.0 perc\_gaps=0.0  
query\_cvg=100.0 subj\_cvg=100.0 alpha=77.01 beta=25 prob=0.9979935332085959  
ATGCCATTTTGCATAATTTTCAGCCAATGGCATAATGTATATGAATTTGACGACTCAATG  
AATATGTACTACTTAGGCCTTCAGGCTGCTAAAGGATACCTGATAGTGGGTATGGAAGAC  
AAAATGTTTTGA

>AA QryID: NC\_000913\_(-)\_1934504\_1934653 HitID: NC\_017660\_(+)\_2872753\_2872902  
rank=1 bitscore=83.6 eval=2.0E-14 perc\_ident=100.0 perc\_cons=100.0 perc\_gaps=0.0  
query\_cvg=100.0 subj\_cvg=100.0 alpha=100.0 beta=28 prob=0.9979935319162261  
ATGACGATTTCCGCACTGAAAGAAATCGAAATGCAGTTTTGTCAGATATTACGCCTGTGT  
GCCGTGTTAATGACAAAAGCAGATAAAAAAGTTGTTATTTTTTTTCATAACATGATCAGT  
GTCAGATTTTTACCCAATGGAAAACGATGA

>AA QryID: NC\_000913\_(+)\_1927791\_1927901 HitID: NC\_017664\_(+)\_2074479\_2074589  
rank=1 bitscore=59.7 eval=3.0E-7 perc\_ident=100.0 perc\_cons=100.0 perc\_gaps=0.0  
query\_cvg=100.0 subj\_cvg=100.0 alpha=100.0 beta=15 prob=0.9979935310774106  
ATGTATATCGAGACAAAAGATGCGCAAATAAGCGGGGCGGTAGGCCGTTATTCAAAGAAA  
TTCGCGCCAGGTAAGGTATTTACTGTATATCAGGTGATAAGGGTATTTTAG

>AA QryID: NC\_000913\_(+)\_3965709\_3965927 HitID: NC\_012947\_(-)\_4485666\_4485884  
rank=1 bitscore=130.0 eval=2.0E-28 perc\_ident=100.0 perc\_cons=100.0 perc\_gaps=0.0  
query\_cvg=100.0 subj\_cvg=100.0 alpha=100.0 beta=51 prob=0.9979935310423848  
ATGCCAAAAACGCCACGTGTTTACGTGGCGTTTTGCTTTTATATCTGTAATCTTAATGCC  
GCGCTGGCGATGTTAGGAAAATTCCTGGAATTTGCTGGCATGTTATGCAATTTGCATATC  
AAATGGTTAATTTTTGCACAGGACTGGTGGGTTTGAACGGACTTTCCCTTCTGAATAAA  
GGTCTTCGTGGTTACTTCTGCTAATAATTTCTCTGA

>AA QryID: NC\_000913\_(-)\_2627142\_2627294 HitID: NC\_016902\_(+)\_1304864\_1305016  
rank=1 bitscore=77.0 eval=3.0E-12 perc\_ident=100.0 perc\_cons=100.0 perc\_gaps=0.0  
query\_cvg=100.0 subj\_cvg=100.0 alpha=100.0 beta=33 prob=0.9979935298752107  
ATGTCCACGCTGTGGACGGTACTTACATTAAGGCACAACAGGACAAAATGGTCAATTCT  
TCGTTATGAAAAAAGCGTCAGTGGATACATATTTAATGTTATGGAAGTTAATTTAATT  
ATTTACAATGATGATGTAATAATGATGAATTAA

>AA QryID: NC\_000913\_(-)\_3181403\_3181597 HitID: NC\_011751\_(-)\_3644809\_3645003  
rank=1 bitscore=115.0 eval=5.0E-24 perc\_ident=100.0 perc\_cons=100.0 perc\_gaps=0.0  
query\_cvg=100.0 subj\_cvg=100.0 alpha=75.24 beta=70 prob=0.9979935294324305  
TTGTTAAATATTAAGGGTAAAAGGATGTTTATCGCCTGGTACTGGATTGTATTGATTGCT  
CTGGTTGTGGTGGGTTATTTCTGCATTTGAAACGTTATTGTCGGGCGTTTCGCCAGGAC  
AGAGACGCACTGCTTGAAGCGCGGAACAAATACTTAAACAGTACGAGAGAAGAGACAGCC  
GAAAAGGTAGAATAA

>AA QryID: NC\_000913\_(+)\_2902327\_2902434 HitID: NC\_017641\_(+)\_3330865\_3330987  
rank=1 bitscore=64.3 eval=9.0E-9 perc\_ident=100.0 perc\_cons=100.0 perc\_gaps=0.0  
query\_cvg=100.0 subj\_cvg=87.5 alpha=60.12 beta=13 prob=0.9979935182618911  
ATGCCGCAACACAGGTTTATCCCCGCTGGCGCGGGGAACACATTACGCCTTTTTGCGAT  
TGCCCGGTTTTGCCGGTTTATCCCCGCTGGCGCGGGGAACACTCTAA



>AA QryID: NC\_000913\_(+)\_3408038\_3408130 HitID: NC\_009801\_(+)\_3739820\_3739912  
 rank=1 bitscore=49.3 evalue=3.0E-4 perc\_ident=100.0 perc\_conserv=100.0 perc\_gaps=0.0  
 query\_cvg=100.0 subj\_cvg=100.0 alpha=100.0 beta=2 prob=0.9979935171386478  
 TTGCCGATTATTTACGCAAATTTGCGTGCCAAAATTTTCATTCATAAAGAAAAATTGAGA  
 ACTTACTCAAATTTCTTTGAGTGTAATTTTAG  
 >AA QryID: NC\_000913\_(-)\_1211763\_1211873 HitID: NC\_017634\_(-)\_1232031\_1232156  
 rank=1 bitscore=50.4 evalue=1.0E-4 perc\_ident=94.44 perc\_conserv=94.44 perc\_gaps=0.0  
 query\_cvg=100.0 subj\_cvg=87.8 alpha=88.69 beta=1 prob=0.9979935156477107  
 ATGGAAATAAAAGTGCAGAGACTATCTCTATGGATGATTAATACTGTCTTTTTATTGTCA  
 CCCATAAATAATCACCAGACTAATACTATCAACTTGATATTTGAAATGTGA  
 >AA QryID: NC\_000913\_(-)\_2282014\_2282133 HitID: NC\_009800\_(-)\_2326170\_2326289  
 rank=1 bitscore=51.6 evalue=6.0E-5 perc\_ident=100.0 perc\_conserv=100.0 perc\_gaps=0.0  
 query\_cvg=100.0 subj\_cvg=100.0 alpha=100.0 beta=13 prob=0.9979935134809279  
 TTGATGAAAGGGCAACATATTACCGTAGCAACGGTTTTTTTTCTGCTTTTTTATGCGTTA  
 AATCATTCTCGTTACGCTGCCTTCTGAAAATGACCGCCATCTTTTATTGCGTCGCTTAA  
 >AA QryID: NC\_000913\_(-)\_1669025\_1669144 HitID: NC\_017644\_(-)\_1652033\_1652152  
 rank=1 bitscore=52.0 evalue=4.0E-5 perc\_ident=100.0 perc\_conserv=100.0 perc\_gaps=0.0  
 query\_cvg=100.0 subj\_cvg=100.0 alpha=100.0 beta=14 prob=0.9979935134083698  
 ATGACACACAGCAAAATGAATCCGTTTATTTGGGTACTTATAATCCTGATGACGCTAGAC  
 GCGCTGCGGGAATTGGCTGGCGCTTCGTCTATTTTAGGATGGCTATTAACGTTGGTTTGA  
 >AA QryID: NC\_000913\_(-)\_944950\_945063 HitID: NC\_017641\_(-)\_1045742\_1045855  
 rank=1 bitscore=61.2 evalue=8.0E-8 perc\_ident=100.0 perc\_conserv=100.0 perc\_gaps=0.0  
 query\_cvg=100.0 subj\_cvg=100.0 alpha=73.55 beta=14 prob=0.9979935132561297  
 ATGCGCATCATGCCACCGCCAAAACATTGTCAATGGGTGAAAATACGCGATATCCCAGC  
 GGCGGTATTATCGATTTATATTACTCATTCATAACGCTAATGCTGAAGAGATGA  
 >AA QryID: NC\_000913\_(-)\_85348\_85470 HitID: NC\_017641\_(-)\_87340\_87462  
 rank=1 bitscore=58.5 evalue=5.0E-7 perc\_ident=100.0 perc\_conserv=100.0 perc\_gaps=0.0  
 query\_cvg=100.0 subj\_cvg=100.0 alpha=72.73 beta=7 prob=0.9979935120826234  
 TTGATAATAAATCGGCTGAATCCCACAACCTTACAGCAATTTCTCTATTTTTTTAATTAAT  
 CCTAAAATAGAGAGCCACACATTCAGAATAAAATTCTACATTCAATAAAAAATGCAGAA  
 TAA  
 >AA QryID: NC\_000913\_(+) \_4615137\_4615241 HitID: NC\_017664\_(+) \_4874043\_4874144  
 rank=1 bitscore=50.1 evalue=2.0E-4 perc\_ident=100.0 perc\_conserv=100.0 perc\_gaps=0.0  
 query\_cvg=97.06 subj\_cvg=100.0 alpha=98.53 beta=5 prob=0.9979935060901379  
 GTGATGTTCACTTTGATCCTGATGCGTTTGCCACCACTGACGCATTCATTTGAAAGTGAA  
 TTATTTGAACCAGATCGCATTACAGTGATGCAAACCTTGTAAGTAG  
 >AA QryID: NC\_000913\_(-)\_29438\_29533 HitID: NC\_018650\_(+) \_4396799\_4396894  
 rank=1 bitscore=49.7 evalue=2.0E-4 perc\_ident=100.0 perc\_conserv=100.0 perc\_gaps=0.0  
 query\_cvg=100.0 subj\_cvg=100.0 alpha=100.0 beta=11 prob=0.9979935040947242  
 ATGGGCGCTAAAAGTCAACTTAATGGCGGGATTTTTATATTATTTGTGGCTCATGCAT  
 GTTTTACAGGCATTAAGCGACAAAAAGATCATCTAA  
 >AA QryID: NC\_000913\_(-)\_4366386\_4366502 HitID: NC\_007946\_(-)\_4640475\_4640591  
 rank=1 bitscore=50.8 evalue=1.0E-4 perc\_ident=97.37 perc\_conserv=100.0 perc\_gaps=0.0  
 query\_cvg=100.0 subj\_cvg=100.0 alpha=97.37 beta=9 prob=0.9979934968867805  
 GTGATCCAGATTACGGTAGAAATCCTCAAGCAGCATATGATCTCGGGTATTCGGTTCGATG  
 CAGGGGATAATCGTCGGTCGAAAAACATTGAAACCACATATATTCTGTGTGTTTAA  
 >AA QryID: NC\_000913\_(-)\_4099494\_4099610 HitID: NC\_007946\_(-)\_4378421\_4378549  
 rank=1 bitscore=52.0 evalue=5.0E-5 perc\_ident=100.0 perc\_conserv=100.0 perc\_gaps=0.0  
 query\_cvg=100.0 subj\_cvg=90.48 alpha=100.0 beta=16 prob=0.9979934964586658  
 GTGATCAAAACCACATCAATTGAAACGCTGTTTTATTTTATCGGATCATTGTTTTTATT  
 TTGAAATTGATCACAAAAAAACCACCGCCGTTGGCGATGGTTCATTTTTTAAGCTGA  
 >AA QryID: NC\_000913\_(+) \_4116350\_4116451 HitID: NC\_009801\_(+) \_4446001\_4446102  
 rank=1 bitscore=49.7 evalue=2.0E-4 perc\_ident=100.0 perc\_conserv=100.0 perc\_gaps=0.0  
 query\_cvg=100.0 subj\_cvg=100.0 alpha=100.0 beta=5 prob=0.9979934883706802  
 GTGGATTATGTCACCAGGAGAAGGATGAAAAGTGTGGCAAACCGTAATCTGCAAGGCGTG  
 CCGCTGGACAGCGATGGCGCGGCTTCATACAATCGGAGCTAA  
 >AA QryID: NC\_000913\_(-)\_3217289\_3217402 HitID: NC\_009801\_(-)\_3548922\_3549035  
 rank=1 bitscore=47.8 evalue=0.001 perc\_ident=100.0 perc\_conserv=100.0 perc\_gaps=0.0  
 query\_cvg=100.0 subj\_cvg=100.0 alpha=100.0 beta=6 prob=0.9979934616080649  
 GTGCAATATTTAATGCTATCTGTTAACATTTGTTGTTATTTTGCACGGTTTTTGTGGGT  
 ATGGATTTGATGATTGCTGCGCAAATGCACGTTTTTCAGGGCAATAATTGCCTGA  
 >AA QryID: NC\_000913\_(-)\_1050408\_1050506 HitID: NC\_013008\_(-)\_1234858\_1234956

rank=1 bitscore=47.8 evalue=9.0E-4 perc\_ident=100.0 perc\_conserv=100.0 perc\_gaps=0.0  
 query\_cvg=100.0 subj\_cvg=100.0 alpha=100.0 beta=1 prob=0.9979934586008614  
 TTGAGATTAAGCAAATTTTATTTTAGCCGTCCGGCGGTCTTAAATATCGCTGGCTTTATT  
 TTATTAACCCCGTATAGTGCAGCGCAGTATTTTCAGTAA  
 >AA QryID: NC\_000913\_(-)\_4038703\_4038813 HitID: NC\_016856\_(-)\_4413499\_4413630  
 rank=1 bitscore=51.6 evalue=6.0E-5 perc\_ident=83.33 perc\_conserv=91.67 perc\_gaps=0.0  
 query\_cvg=100.0 subj\_cvg=83.72 alpha=88.89 beta=8 prob=0.997993453470564  
 ATGGCGGGCGTCCTGCCCGCCACCCTCCGGGCGGTGCTTCGCAACGTTCAAATCCGCTC  
 CCGGCGGATTTGTCCTACTCAGGAGAGCGTTCACCGACAAACAACAGATAA  
 >AA QryID: NC\_000913\_(-)\_4169823\_4169933 HitID: NC\_016856\_(-)\_4413499\_4413630  
 rank=1 bitscore=51.6 evalue=6.0E-5 perc\_ident=83.33 perc\_conserv=91.67 perc\_gaps=0.0  
 query\_cvg=100.0 subj\_cvg=83.72 alpha=88.89 beta=8 prob=0.997993453470564  
 ATGGCGGGCGTCCTGCCCGCCACCCTCCGGGCGGTGCTTCGCAACGTTCAAATCCGCTC  
 CCGGCGGATTTGTCCTACTCAGGAGAGCGTTCACCGACAAACAACAGATAA  
 >AA QryID: NC\_000913\_(-)\_1570188\_1570301 HitID: NC\_017641\_(-)\_1815439\_1815552  
 rank=1 bitscore=48.9 evalue=4.0E-4 perc\_ident=97.3 perc\_conserv=97.3 perc\_gaps=0.0  
 query\_cvg=100.0 subj\_cvg=100.0 alpha=97.3 beta=4 prob=0.9979934461564657  
 GTGATAATTCAGGAGACACAGAATGCGCATAAAAATAACAGCATAAAACACCTTACCACC  
 ACCCAAGAATTTTCATATTGTATTGTTTTCAATGAAAAAATATTATTCGCGTAA  
 >AA QryID: NC\_000913\_(-)\_395557\_395658 HitID: NC\_009801\_(-)\_429313\_429414  
 rank=1 bitscore=47.4 evalue=0.001 perc\_ident=100.0 perc\_conserv=100.0 perc\_gaps=0.0  
 query\_cvg=100.0 subj\_cvg=100.0 alpha=100.0 beta=5 prob=0.9979934442083906  
 ATGCAGGCATTGGTGAGCAGGAAAAAGATCGTGTTACGCGCCGTTACGTTTTTAACACT  
 ATTATTGCTACTAATTCGCCCTTTGCAATCTATCAATGAGTAG  
 >AA QryID: NC\_000913\_(+)\_42224\_42334 HitID: NC\_009800\_(+)\_45484\_45594  
 rank=1 bitscore=52.0 evalue=4.0E-5 perc\_ident=94.44 perc\_conserv=94.44 perc\_gaps=0.0  
 query\_cvg=100.0 subj\_cvg=100.0 alpha=94.44 beta=17 prob=0.9979934414016234  
 TTGCTACGCCGTGTTTTCAATATTGGTGAGGAACTTAACAATATTGAAAGTTGGATTTAT  
 CTGCGTGTGACATTTTCAATATTGGTGATTAAAGTTTTATTTCAAAATTAA  
 >AA QryID: NC\_000913\_(-)\_655236\_655346 HitID: NC\_009801\_(-)\_678686\_678796  
 rank=1 bitscore=47.4 evalue=0.001 perc\_ident=100.0 perc\_conserv=100.0 perc\_gaps=0.0  
 query\_cvg=100.0 subj\_cvg=100.0 alpha=100.0 beta=1 prob=0.9979934315356347  
 TTGTTATCTATGTATAAAAACAGCAACTTCAATGTCTTAATGGCAGTTTTTCTTGATTTT  
 AATCAGCATTTCATCGCCAATTTATTGGGCATATTTTTCCTTAAGCTTTAG  
 >AA QryID: NC\_000913\_(-)\_1830266\_1830364 HitID: NC\_017656\_(-)\_2183690\_2183788  
 rank=1 bitscore=55.8 evalue=3.0E-6 perc\_ident=100.0 perc\_conserv=100.0 perc\_gaps=0.0  
 query\_cvg=100.0 subj\_cvg=100.0 alpha=72.99 beta=4 prob=0.9979934193445767  
 ATGGTTGTTAATGATGTCAACGATGGCGCAAAAAATGCCCGCTTTTGGTGCGCGCTGCGT  
 CAGAATGGCGCAGTAATTTCCAGTAAATTTTCGTCATGA  
 >AA QryID: NC\_000913\_(-)\_1797080\_1797175 HitID: NC\_012947\_(+)\_2038913\_2039008  
 rank=1 bitscore=42.4 evalue=0.04 perc\_ident=100.0 perc\_conserv=100.0 perc\_gaps=0.0  
 query\_cvg=100.0 subj\_cvg=100.0 alpha=100.0 beta=9 prob=0.9979933885421901  
 ATGCGCGTTTTGAAAAATAAAAAGCCTGTCTCATCAGGTGTAATTGTCGCAGCCAGACTG  
 GACACGGCCAGCGGAGAAACCGGAGCGTATTTAA  
 >AA QryID: NC\_000913\_(+)\_3250784\_3250876 HitID: NC\_009801\_(+)\_3587561\_3587653  
 rank=1 bitscore=46.6 evalue=0.002 perc\_ident=100.0 perc\_conserv=100.0 perc\_gaps=0.0  
 query\_cvg=100.0 subj\_cvg=100.0 alpha=100.0 beta=2 prob=0.9979933835327789  
 ATGTCGTTATATAAATTACCTATAAAAAATAACCATGTATTTATCTTAAATATCAAAACC  
 TTTATAACATCCGAAAAAGAAAGATACGAATAG  
 >AA QryID: NC\_000913\_(+)\_1064566\_1064667 HitID: NC\_009800\_(+)\_1126179\_1126280  
 rank=1 bitscore=46.6 evalue=0.002 perc\_ident=100.0 perc\_conserv=100.0 perc\_gaps=0.0  
 query\_cvg=100.0 subj\_cvg=100.0 alpha=100.0 beta=1 prob=0.997993378945282  
 TTGGTAAATATTGTCTCTGTATTGGTAACGCCGAGATATTCTGTTAGCCACAGGTGCA  
 ATTATCAGCGGCGTACGCGAGGCAGGGGCTAATCAGGCATAG  
 >AA QryID: NC\_000913\_(-)\_4276159\_4276272 HitID: NC\_009801\_(-)\_4617220\_4617333  
 rank=1 bitscore=45.8 evalue=0.004 perc\_ident=100.0 perc\_conserv=100.0 perc\_gaps=0.0  
 query\_cvg=100.0 subj\_cvg=100.0 alpha=100.0 beta=3 prob=0.997993368804496  
 TTGACGATGAAAAACCAGGCAATTGATGCGCAAACGTTATCGTCGGTGCGCAAGATTGCA  
 GCGTTATCGAGCCGTATACCGTTCAGGATTGCGATAAAAAATCGTCTGAGATGA  
 >AA QryID: NC\_000913\_(-)\_3662714\_3662821 HitID: NC\_009800\_(-)\_3706002\_3706109  
 rank=1 bitscore=44.7 evalue=0.007 perc\_ident=100.0 perc\_conserv=100.0 perc\_gaps=0.0  
 query\_cvg=100.0 subj\_cvg=100.0 alpha=100.0 beta=3 prob=0.9979933305185549

GTGCGAAAATATATTCGTGCTGCATTTACTTATTATCAATTAAGTGTATGCAAACTAC  
TTTGTGGATAAATTTTGGTCTACCAAATCTGGCAGTTTTTTCGCTAA  
>AA QryID: NC\_000913\_(-)\_418419\_418529 HitID: NC\_009800\_(-)\_482987\_483097  
rank=1 bitscore=42.7 evalue=0.033 perc\_ident=97.22 perc\_conserv=97.22 perc\_gaps=0.0  
query\_cvg=100.0 subj\_cvg=100.0 alpha=97.22 beta=6 prob=0.9979933091165099  
ATGGCTAATCATGCGAACAAAAATCACCAATCGTTGTAAATCTAACGCCCGTATTTTG  
ACTGCAAAGAAAAATAAGCCAGCATCGACTGGCTTATGGCAATAAAAGATGA  
>AA QryID: NC\_000913\_(-)\_281555\_281568 HitID: NC\_017631\_(-)\_3022336\_3022461  
rank=1 bitscore=46.2 evalue=0.002 perc\_ident=95.12 perc\_conserv=97.56 perc\_gaps=0.0  
query\_cvg=100.0 subj\_cvg=100.0 alpha=95.12 beta=4 prob=0.9979932966213234  
ATGCACCATCTTCTCCAAAAAATTTCTTCAAAAATATCTCATTTCTAAATAACTCCTTT  
ATCCATTTCTGAATTTTCTTCTCTTCGCCATCAGCGACAAAATCAAGCAATTACGCTA  
AAGTAG  
>AA QryID: NC\_000913\_(-)\_3352118\_3352222 HitID: NC\_020163\_(-)\_4122839\_4122943  
rank=1 bitscore=45.8 evalue=0.004 perc\_ident=97.06 perc\_conserv=97.06 perc\_gaps=0.0  
query\_cvg=100.0 subj\_cvg=100.0 alpha=97.06 beta=2 prob=0.9979932647118321  
GTGATTTATGTGATTATGCATGAAATTCGGTAATTTTGATTGATTATGCAGTTGATAAA  
AGCAGGCCCGGGACGATTGATCCAGGTCATCGCCGAATTGAGCTAA  
>AA QryID: NC\_000913\_(+)\_4593887\_4593979 HitID: NC\_009801\_(+)\_4935205\_4935297  
rank=1 bitscore=45.8 evalue=0.003 perc\_ident=96.67 perc\_conserv=100.0 perc\_gaps=0.0  
query\_cvg=100.0 subj\_cvg=100.0 alpha=96.67 beta=2 prob=0.9979932515324008  
GTGAGTCCATTAACACCCGATTTAAACATTTTTATGCGTGTGTTTTACAAAAAAGATT  
TTCCGTTCCGCTGCCATTTTTCATTTTCATTGA  
>AA QryID: NC\_000913\_(-)\_3913278\_3913370 HitID: NC\_009800\_(-)\_3942434\_3942520  
rank=1 bitscore=44.3 evalue=0.01 perc\_ident=100.0 perc\_conserv=100.0 perc\_gaps=0.0  
query\_cvg=93.33 subj\_cvg=100.0 alpha=96.67 beta=1 prob=0.997993231744092  
GTGACGATGGTCGAAAATGGCGCTTTCGTCAGCGGGGATAATCCGTTATTGAACAATTTA  
TCCTCTGTCCATTTACGATGAAAAAAATGTAG  
>AA QryID: NC\_000913\_(-)\_3634010\_3634108 HitID: NC\_009801\_(-)\_3947676\_3947789  
rank=1 bitscore=46.6 evalue=0.002 perc\_ident=81.25 perc\_conserv=90.62 perc\_gaps=0.0  
query\_cvg=100.0 subj\_cvg=86.49 alpha=87.05 beta=8 prob=0.997993208270975  
GTGGATGGAAAGGTGATTGAAAACTCACTCAGTGGCCAGATCTTTATGAAATATGAACAG  
GTTGAAAAAAACAGTAACTTTGCTGTTTTTATACTTAA  
>AA QryID: NC\_000913\_(-)\_3465063\_3465179 HitID: NC\_017628\_(-)\_3837937\_3838053  
rank=1 bitscore=49.7 evalue=2.0E-4 perc\_ident=97.37 perc\_conserv=97.37 perc\_gaps=0.0  
query\_cvg=100.0 subj\_cvg=100.0 alpha=77.54 beta=7 prob=0.9979931531474431  
GTGTTGGCGATACCTTCCAGTATCGCCGCATTTTTGTCAATGGGCTACTTTTGGTAGCC  
CATTATTTTATTCATATTTCTATTCTTTGCTTAAAAAAGAGTCTTTCCGTAATTGA  
>AA QryID: NC\_000913\_(+)\_3421291\_3421401 HitID: NC\_016856\_(-)\_4413499\_4413630  
rank=1 bitscore=55.8 evalue=3.0E-6 perc\_ident=86.11 perc\_conserv=94.44 perc\_gaps=0.0  
query\_cvg=100.0 subj\_cvg=83.72 alpha=53.54 beta=8 prob=0.9979931430298756  
ATGGCGGGCGCTCCTGCCCGCCACCCTCCGGGCGCTTGTTCGCAACGTTCAAATCCGCTC  
CCGGCGGATTTGCTCTACTCGGGAGAGTGTTACCGACAAACAACAGATAA  
>AA QryID: NC\_000913\_(-)\_1391114\_1391224 HitID: NC\_009800\_(-)\_1440541\_1440651  
rank=1 bitscore=42.7 evalue=0.027 perc\_ident=100.0 perc\_conserv=100.0 perc\_gaps=0.0  
query\_cvg=100.0 subj\_cvg=100.0 alpha=100.0 beta=1 prob=0.9979931323842831  
TTGATGCGTAATTATTTGTTTCGCCTTAAAGAAATGCAAACAACTTCCATCAAAAAAGTG  
ACAAAGGAAGCATCAAATGTTTTAAGTATCAATATATCAAATCAGATTTAG  
>AA QryID: NC\_000913\_(-)\_1328800\_1328916 HitID: NC\_013716\_(+)\_1841973\_1842110  
rank=1 bitscore=49.7 evalue=2.0E-4 perc\_ident=81.08 perc\_conserv=86.49 perc\_gaps=0.0  
query\_cvg=97.37 subj\_cvg=82.22 alpha=72.81 beta=1 prob=0.9979930881655081  
TTGGCTACAGGCGCTATAGCACGACGGAATTTTGGTCAATGTCAAGCAAATCTATTGC  
CAGATTGACGAAAGCGTCACACTGTACCTGATAAAATCCGATACGCAACTTTATTAG  
>AA QryID: NC\_000913\_(+)\_3416869\_3416988 HitID: NC\_017652\_(+)\_3721431\_3721550  
rank=1 bitscore=53.9 evalue=1.0E-5 perc\_ident=100.0 perc\_conserv=100.0 perc\_gaps=0.0  
query\_cvg=100.0 subj\_cvg=100.0 alpha=71.03 beta=2 prob=0.9979930684733717  
ATGTGGCGCATGTTTCATTTTCGCACCATTCGCGGGGCGCTGTTTTATTATTTCTGTCT  
ACACTCAGCTTATTGCGACGCGAAATCGTGCGCAAAAGCTGGCACTACTTTTGCTTATAA  
>AA QryID: NC\_000913\_(-)\_4244535\_4244633 HitID: NC\_017625\_(+)\_4267863\_4267958  
rank=1 bitscore=43.9 evalue=0.012 perc\_ident=100.0 perc\_conserv=100.0 perc\_gaps=0.0  
query\_cvg=96.88 subj\_cvg=100.0 alpha=98.44 beta=14 prob=0.9979930665665008  
GTGATGTTGCTTGCAAAAATCGTGGCGATTTTATGTGCGCATCTCCACATTACCGCCAAT

TCTGTAACAGAGATCACACAAAGCGACGGTGGGGCGTAG  
>AA QryID: NC\_000913\_(+)\_1255517\_1255699 HitID: NC\_012947\_(-)\_2537761\_2537940  
rank=1 bitscore=64.7 eval=1.0E-8 perc\_ident=67.8 perc\_cons=67.8 perc\_gaps=0.0  
query\_cvg=98.33 subj\_cvg=100.0 alpha=67.23 beta=24 prob=0.9979930452773607  
TTGATGTATCTGCATAACAAAAACAATATGCGCCATTTTGCATTACTAATAAGAAAAAG  
CAAAAAACATCGATATTCATTTTGGTCAATGGGTTTTCTGGCCTATCGTTGTTATTGTG  
CTACTGGTTATCATTTTCATCTTGCCAGCATATTGGAGCGTGATCAATTTGATCAGCTG  
TGA  
>AA QryID: NC\_000913\_(-)\_2360248\_2360343 HitID: NC\_009800\_(-)\_2403013\_2403108  
rank=1 bitscore=41.2 eval=0.088 perc\_ident=100.0 perc\_cons=100.0 perc\_gaps=0.0  
query\_cvg=100.0 subj\_cvg=100.0 alpha=100.0 beta=1 prob=0.997993032415294  
GTGCGTAATTTCTCCAGTCTGCTGGACGAGGAGCGGGATTGATGCGCTTCACAATTTTA  
CTCCCCCTGAGCAACGAGACTGATTCCAGTATCTAA  
>AA QryID: NC\_000913\_(-)\_4470660\_4470764 HitID: NC\_009801\_(-)\_4813195\_4813299  
rank=1 bitscore=45.1 eval=0.006 perc\_ident=94.12 perc\_cons=94.12 perc\_gaps=0.0  
query\_cvg=100.0 subj\_cvg=100.0 alpha=94.12 beta=1 prob=0.9979930202196187  
TTGCGTGAAAGTGAAAAAGGAAAAAGCAGGGAATGTCTGCAATTATTGATACCGAAGGAC  
AGTTCCCTGCAGAATCACATCAAATAAAAATGCATATACCTTGA  
>AA QryID: NC\_000913\_(-)\_4601105\_4601197 HitID: NC\_009800\_(-)\_4606397\_4606489  
rank=1 bitscore=45.4 eval=0.004 perc\_ident=93.33 perc\_cons=100.0 perc\_gaps=0.0  
query\_cvg=100.0 subj\_cvg=100.0 alpha=93.33 beta=1 prob=0.9979930083391093  
ATGCAAAATCACACAACCAATATTTATTCAATGAAATCTGATGGTTTTAGCTTGTTAACA  
TTAAAAAACGTGCCCGGTTATCTATTATCTCTGA  
>AA QryID: NC\_000913\_(-)\_310759\_310854 HitID: NC\_009801\_(-)\_335050\_335145  
rank=1 bitscore=38.5 eval=0.55 perc\_ident=100.0 perc\_cons=100.0 perc\_gaps=0.0  
query\_cvg=100.0 subj\_cvg=100.0 alpha=100.0 beta=2 prob=0.9979929580742656  
ATGCAAGTAAGAATTGAACGTTATATTGCCAATAACCTTATGAAACCAAATGTCTTTTTT  
TTCTTATCAAAAAAGCAATATTTTCAGTTTTTCTAA  
>AA QryID: NC\_000913\_(-)\_2589147\_2589248 HitID: NC\_009800\_(-)\_2613032\_2613133  
rank=1 bitscore=40.0 eval=0.18 perc\_ident=100.0 perc\_cons=100.0 perc\_gaps=0.0  
query\_cvg=100.0 subj\_cvg=100.0 alpha=100.0 beta=1 prob=0.9979929464809324  
ATGAGAATAAATACTCATTTAAGGGTGAAAACATTTTGCCTGCAAATGATTATCAGGAAA  
TATAACATTATCGAAGTATTCAAATTAACAATACTATTAATAA  
>AA QryID: NC\_000913\_(+) \_1084010\_1084111 HitID: NC\_017646\_(+) \_1159064\_1159180  
rank=1 bitscore=37.7 eval=0.84 perc\_ident=96.97 perc\_cons=100.0 perc\_gaps=0.0  
query\_cvg=100.0 subj\_cvg=86.84 alpha=90.59 beta=1 prob=0.9979929298032992  
ATGCAAATCCTGCTGAAAGCACACAGCTTTTTTCATCACTGTCATCACTCTGTCATCTTT  
CCAGTAGAAACTAATGTCACTGAAATGGTGTATTATAGTTAA  
>AA QryID: NC\_000913\_(+) \_2288318\_2288413 HitID: NC\_009801\_(+) \_2477387\_2477482  
rank=1 bitscore=36.6 eval=2.0 perc\_ident=100.0 perc\_cons=100.0 perc\_gaps=0.0  
query\_cvg=100.0 subj\_cvg=100.0 alpha=100.0 beta=2 prob=0.9979928108228346  
GTGATTGATTTTTTAGTTGTTTTCTTGATGAGAAGCTGATGCAAAATCCGTCTTTATA  
ATGAAAATGATGCCAAAGCGAACGACAAGGTTGTAG  
>AA QryID: NC\_000913\_(-)\_3865644\_3865736 HitID: NC\_009801\_(-)\_4184383\_4184475  
rank=1 bitscore=38.1 eval=0.63 perc\_ident=100.0 perc\_cons=100.0 perc\_gaps=0.0  
query\_cvg=100.0 subj\_cvg=100.0 alpha=100.0 beta=1 prob=0.9979927939806704  
TTGATCGTGGGTGTTGGCCTGATGAGTTATAGCGATCCCTTGCTGAAAATAACATCATCA  
TTACGTCGCACTGTGGCGGCTATCGCACTTTAA  
>AA QryID: NC\_000913\_(+) \_474446\_474586 HitID: NC\_011353\_(+) \_544889\_545011  
rank=1 bitscore=49.7 eval=4.0E-4 perc\_ident=67.5 perc\_cons=70.0 perc\_gaps=0.0  
query\_cvg=86.96 subj\_cvg=100.0 alpha=63.1 beta=6 prob=0.9979927297222496  
TTGCTACTGGTCCGATGGGTGCAATGGTCTGAATTACGGGCTAATTACAGGCAGAAATGC  
GTGATGTGTGCCACACTTGTTGACGTTACTATTTTGTTAACCACTCTTCCGGCGAGGAAA  
GTTAGCCCGCTGGTGCATTGA  
>AA QryID: NC\_000913\_(-)\_29237\_29404 HitID: NC\_017638\_(-)\_29238\_29405  
rank=1 bitscore=57.8 eval=2.0E-6 perc\_ident=67.27 perc\_cons=67.27 perc\_gaps=0.0  
query\_cvg=100.0 subj\_cvg=100.0 alpha=67.27 beta=13 prob=0.9979927168735294  
TTGCATGAAATAAAAAACGAGCAGAAAAAAGTGGACCAAATGGTCAAAATTTACATTAATA  
CAACAAAAACAGAAGACAAAAACATGTAATTTTTGGCACTTATAGACAATTTAAAAACATA  
ACACCAAAAAATAAAAGGGCCAAAAATTAAGCCCTTTATAATCAATAA  
>AA QryID: NC\_000913\_(-)\_3427065\_3427229 HitID: NC\_017664\_(-)\_3638505\_3638669

rank=1 bitscore=52.0 evalue=8.0E-5 perc\_ident=70.37 perc\_conserv=70.37 perc\_gaps=0.0  
query\_cvg=100.0 subj\_cvg=100.0 alpha=72.22 beta=6 prob=0.9979926876642108  
ATGACTTTGGGGGCATTATTGGCCTTGTGCAAGTCTTTTAGTATGCAAAAAAGCACCGTT  
TTGTGTGCGATTGCAGCAAAAAGGGTGAAAAACAACAAACAGAAAAAAGATCAAAAAA  
ATACTTGTGCAAAAAATTGGGATCCCTATAATGCGCCTCCGTGA  
>AA QryID: NC\_000913\_(+)\_312165\_312257 HitID: NC\_009801\_(+)\_336456\_336548  
rank=1 bitscore=39.7 evalue=0.24 perc\_ident=96.67 perc\_conserv=100.0 perc\_gaps=0.0  
query\_cvg=100.0 subj\_cvg=100.0 alpha=96.67 beta=1 prob=0.9979926303485227  
GTGATTGATGATGGTTTTGCTGAGAGTATGGATTTTCGAGAATGGAGGTTATCTCCACT  
TTACTGGCCGATAATTTATCGCAGTATGATTGA  
>AA QryID: NC\_000913\_(-)\_985006\_985104 HitID: NC\_009801\_(-)\_1051696\_1051794  
rank=1 bitscore=51.6 evalue=6.0E-5 perc\_ident=100.0 perc\_conserv=100.0 perc\_gaps=0.0  
query\_cvg=100.0 subj\_cvg=100.0 alpha=71.57 beta=2 prob=0.9979924976231794  
TTGTTAAATGCCGAAAAACAGGACTTTGGTCCTGTTTTTTTATACCTCCAGAGCAAT  
CTCACGCTTGCAAAAACAGCCTGCGTTTTTCATCAGTAA  
>AA QryID: NC\_000913\_(+)\_440655\_440747 HitID: NC\_009801\_(+)\_474306\_474398  
rank=1 bitscore=36.6 evalue=1.8 perc\_ident=96.67 perc\_conserv=96.67 perc\_gaps=0.0  
query\_cvg=100.0 subj\_cvg=100.0 alpha=96.67 beta=2 prob=0.9979924619137766  
GTGCACAGCAAAGCGATGTTAGTGGTATACTTCCGCGCCTGGATGCAGCCGCAGGTGTGG  
GCTGCTGTATTTTTCCCTATACAAGTCGCTTAA  
>AA QryID: NC\_000913\_(-)\_3670097\_3670210 HitID: NC\_017651\_(-)\_3981871\_3981999  
rank=1 bitscore=45.4 evalue=0.005 perc\_ident=81.08 perc\_conserv=91.89 perc\_gaps=0.0  
query\_cvg=100.0 subj\_cvg=88.1 alpha=76.25 beta=2 prob=0.9979922616245072  
GTGCTTATTTTTGTCTCCTTGCCGTTTGTATTTTGGCTTGTGGTCGCGGAATTTCAATT  
TTAATTGCATGCGTACTAACCACCAATATAAGGAAATCCTCAAAATTGTTTTAA  
>AA QryID: NC\_000913\_(-)\_3550755\_3550856 HitID: NC\_013008\_(-)\_4323962\_4324063  
rank=1 bitscore=35.8 evalue=3.7 perc\_ident=93.94 perc\_conserv=96.97 perc\_gaps=0.0  
query\_cvg=100.0 subj\_cvg=100.0 alpha=93.94 beta=2 prob=0.9979919008825642  
ATGAAAGTGCCATCTAAAAAGATGATCTTAATAAATCTATTAAGAATGAGATGGAGCACA  
CTGGATATTTTACTTATGAAACTGTTTCACTCCTTTACTTAA  
>AA QryID: NC\_000913\_(-)\_2362418\_2362519 HitID: NC\_009800\_(-)\_2405183\_2405284  
rank=1 bitscore=35.0 evalue=6.1 perc\_ident=93.94 perc\_conserv=93.94 perc\_gaps=0.0  
query\_cvg=100.0 subj\_cvg=100.0 alpha=93.94 beta=1 prob=0.9979913764032202  
GTGAAAGTGACAGTAATCTTTTTGCGATGATAACTGTACTTATTATTATTTTTGTGTGT  
ATCGATAAAGTGTGTTTATTTTTTCGGCATTAAATTATTTAA  
>AA QryID: NC\_000913\_(+)\_2261683\_2261814 HitID: NC\_009801\_(+)\_2451950\_2452081  
rank=1 bitscore=50.8 evalue=1.0E-4 perc\_ident=72.09 perc\_conserv=72.09 perc\_gaps=0.0  
query\_cvg=100.0 subj\_cvg=100.0 alpha=72.09 beta=16 prob=0.9979913737813663  
GTGCTGCACAATTTTTGCCATTTTCCTAATTGCTGATGGGAAATCCGTTATCAGCAA  
TTTCATTTACGACGCTCAGCAGCCAATCAGCAACAGTGAAATGGCATTGACTATTCG  
TGGCGCTTTTGA  
>AA QryID: NC\_000913\_(+)\_1804248\_1804355 HitID: NC\_013008\_(+)\_2311213\_2311320  
rank=1 bitscore=52.8 evalue=3.0E-5 perc\_ident=100.0 perc\_conserv=100.0 perc\_gaps=0.0  
query\_cvg=100.0 subj\_cvg=100.0 alpha=61.73 beta=2 prob=0.9979913356213466  
TTGAATAAGCATGTGGCGAAAAACAGATTTTATTTATATATATTTATCTGCAAAATTTTA  
AATAAAGCTCCAATAAATCATATTGTTAATTTCTTCACTTTCCGCTGA  
>AA QryID: NC\_000913\_(+)\_384012\_384119 HitID: NC\_009801\_(+)\_417643\_417750  
rank=1 bitscore=42.7 evalue=0.028 perc\_ident=100.0 perc\_conserv=100.0 perc\_gaps=0.0  
query\_cvg=100.0 subj\_cvg=100.0 alpha=74.64 beta=3 prob=0.9979911940661221  
ATGTTAAGTGTTTGTATGTTTGGTATGTATAGTTATTTGTTTTATACATTGTATTTAGA  
TGTGATTTAGTTTGTCAATTAATTGCATTTAAAAAATATGTTCTGTGA  
>AA QryID: NC\_000913\_(-)\_1211527\_1211640 HitID: NC\_017641\_(-)\_1419454\_1419567  
rank=1 bitscore=48.1 evalue=6.0E-4 perc\_ident=97.3 perc\_conserv=97.3 perc\_gaps=0.0  
query\_cvg=100.0 subj\_cvg=100.0 alpha=71.85 beta=1 prob=0.9979910969418503  
ATGTATTTTAGCCAGGAACAGGTTAAATCATTCCTATATAACTCAAAAATTGAAACCTTA  
TTCTCATGTCATGCTTATATTCATTATTATCGTTATATAAAAAGGCAACCATAA  
>AA QryID: NC\_000913\_(+)\_85445\_85570 HitID: NC\_010658\_(+)\_76414\_76539  
rank=1 bitscore=47.4 evalue=0.001 perc\_ident=92.68 perc\_conserv=92.68 perc\_gaps=0.0  
query\_cvg=100.0 subj\_cvg=100.0 alpha=68.69 beta=3 prob=0.9979907214614223  
GTGGGATTACGCCGATTTATTATCAATTTAATCCTCTGTAATGGAGGATTTTATCGTTTC  
TTTTACCTTTCTCCTGTTTATTCTTATTACCCCGTGTATGTCTCTGGCTGCCAATT  
GCTTAA

>AA QryID: NC\_000913\_(-)\_3524281\_3524406 HitID: NC\_016856\_(-)\_3663870\_3663983  
 rank=1 bitscore=45.8 evaluate=0.003 perc\_ident=69.44 perc\_conserv=83.33 perc\_gaps=0.0  
 query\_cvg=87.8 subj\_cvg=97.3 alpha=64.27 beta=2 prob=0.9979901726909457  
 GTGGAGTTTAACTTGAGCATCATTAAGCACATCACAGTAACCGCTGATCATAGCAAACCC  
 TCTGAAGGCGGAATATCAGCAAATTCCTGGAGTTATTTCAACCTATTGACTTTTAATTTG  
 ATTTGA

>AA QryID: NC\_000913\_(+)\_4175152\_4175268 HitID: NC\_016514\_(+)\_207937\_208032  
 rank=1 bitscore=47.0 evaluate=0.001 perc\_ident=87.1 perc\_conserv=90.32 perc\_gaps=0.0  
 query\_cvg=81.58 subj\_cvg=100.0 alpha=53.6 beta=2 prob=0.9979869883563235  
 TTGCCGATAACATTTGACGCAATGCGCACTAAAAGGGCATCATTTGATGCCCTTTTTCGCA  
 CGCTTTTCGTACCAGAACCTGGCTCATCAGTGATTTTCTTTGTCATAATCATTGCTGA

>AA QryID: NC\_000913\_(+)\_2541687\_2541779 HitID: NC\_010102\_(-)\_3570393\_3570497  
 rank=1 bitscore=47.0 evaluate=0.001 perc\_ident=83.33 perc\_conserv=86.67 perc\_gaps=0.0  
 query\_cvg=100.0 subj\_cvg=88.24 alpha=46.56 beta=2 prob=0.9979833010687846  
 TTGTTGCAGTCAGTTTGGACACGAACAGCGCGGAGAAACCGGAGCGTACACATAGTACGT  
 GAGGATTTTCGAGCACTGCCCCGGGGCCAAAATGA

>AA QryID: NC\_000913\_(-)\_1986575\_1986715 HitID: NC\_011415\_(-)\_2203660\_2203800  
 rank=1 bitscore=50.1 evaluate=3.0E-4 perc\_ident=63.04 perc\_conserv=63.04 perc\_gaps=0.0  
 query\_cvg=100.0 subj\_cvg=100.0 alpha=63.04 beta=12 prob=0.9979771192284685  
 TTGTTGCTGTGGCGTCACTATAATTTGTTATTTTATTATTTGCAAAGGTAAAATATAAA  
 CTTCAATTATTAATAACGAATGGGAATAAACGCATTACCGCTATTTCTTTAATCAGC  
 GAAGATCCCCTCGCTGATTAA

>AA QryID: NC\_000913\_(-)\_2727283\_2727375 HitID: NC\_006511\_(-)\_2617696\_2617788  
 rank=1 bitscore=34.7 evaluate=7.0 perc\_ident=73.33 perc\_conserv=76.67 perc\_gaps=0.0  
 query\_cvg=100.0 subj\_cvg=100.0 alpha=73.33 beta=1 prob=0.9979721008041866  
 GTGAAAGTCGCCGACCTCAATATCTCAAAACAGACTGTTAAGTCTTGTTTGATATATTTG  
 CTCTTTAAAAATCTGGATCAAGCTGAAAATTGA

>AA QryID: NC\_000913\_(+)\_2276492\_2276590 HitID: NC\_009792\_(-)\_574175\_574273  
 rank=1 bitscore=36.2 evaluate=2.7 perc\_ident=70.97 perc\_conserv=74.19 perc\_gaps=0.0  
 query\_cvg=96.88 subj\_cvg=96.88 alpha=68.75 beta=1 prob=0.9979704683016408  
 TTGATTTTACATAAAATAAACATATATCGGGGGAATGATAGATTTGTGGTTGACATGCAT  
 CAACAAAGGAAGCCTTTTAGCTTCCTCGTTGTGCAATAG

>AA QryID: NC\_000913\_(+)\_3939387\_3939494 HitID: NC\_016832\_(-)\_3723697\_3723816  
 rank=1 bitscore=43.9 evaluate=0.013 perc\_ident=74.29 perc\_conserv=82.86 perc\_gaps=0.0  
 query\_cvg=100.0 subj\_cvg=89.74 alpha=41.27 beta=2 prob=0.9979642287845393  
 ATGCCACCAGGAAGTGTGATTACGGTTGCAAAAACGGCAAATTGCTTGTTTTATGGCACA  
 TTAACGGGGGCTTTTCTGAAAAAATGCGCGGTGAGAAAATTATTTTAA

>AA QryID: NC\_000913\_(+)\_3382388\_3382549 HitID: NC\_010102\_(+)\_3486487\_3486609  
 rank=1 bitscore=40.4 evaluate=0.24 perc\_ident=61.7 perc\_conserv=65.96 perc\_gaps=14.89  
 query\_cvg=88.68 subj\_cvg=100.0 alpha=29.47 beta=1 prob=0.9979545024368213  
 ATGTGTAGTCACGCAAGTTTAGCGTTTATGCATTTAATTGCCGTAATCAGGAACCTAACT  
 TACGTAATTAACAGTCGCTTATGCATTAGCGCAACATTCCAACAGGTGGTGACAATATAC  
 CCTACCGTTCAGCCAAAACAACATCAATTTGATAACAATTAA

>AA QryID: NC\_000913\_(-)\_259393\_259545 HitID: NC\_009792\_(+)\_2736596\_2736748  
 rank=1 bitscore=47.8 evaluate=0.002 perc\_ident=62.79 perc\_conserv=74.42 perc\_gaps=0.0  
 query\_cvg=86.0 subj\_cvg=86.0 alpha=54.0 beta=11 prob=0.9979170292166802  
 TTGCCAACCATCTGCGAGCAAAGCATGGCGTTTTGTTGCGCGGGATCAGCAAGCCTAGCG  
 GCAGTTGTTTACGCTTTTATTACAGATTTAATAAATTACCACATTTTAAGAATATTATTA  
 ATCTGTAATATATCTTTAACAATCTCAGGTTAA

>AA QryID: NC\_000913\_(+)\_2875893\_2876120 HitID: NC\_018661\_(-)\_1154515\_1154736  
 rank=1 bitscore=64.3 evaluate=2.0E-8 perc\_ident=54.29 perc\_conserv=57.14 perc\_gaps=0.0  
 query\_cvg=93.33 subj\_cvg=95.89 alpha=11.61 beta=4 prob=0.9977991908669975  
 ATGTCTGAACTCCCGGTTTATCCCCGCTGGCGCGGGGAACTCCCGGGGATAATGTTTAC  
 GGTTCATGCGCCCCCGGTTTATCCCCGCTGGCGCGGGGAACTCTGGGCGGCTTGCCTTGC  
 AGCCAGCTCCAGCAGCGGTTTATCCCCGCTGGCGCGGGGAACTCAAGCTGGCTGGCAATC  
 TCTTTCGGGGTGAGTCCGGTTTATCCCCGCTGGCGCGGGGAACTCTAG

>AA QryID: NC\_000913\_(-)\_915483\_915638 HitID: NC\_017651\_(-)\_937022\_937177  
 rank=1 bitscore=48.5 evaluate=0.001 perc\_ident=58.82 perc\_conserv=58.82 perc\_gaps=0.0  
 query\_cvg=100.0 subj\_cvg=100.0 alpha=58.82 beta=6 prob=0.9977537476222578  
 TTGCTAATACGTGATGACATCACATTTAAGCATGGCAAATGTCTGAAAAATGAGCGAATA  
 ATCGCGTTATACTCCCTCTTGCTGATAAGTCTGCAAAAACAACAAAATCAAATAATTAGC  
 ATGATAAATTATTTTTTATTACGCCTAAAGGATTAA

>AA QryID: NC\_000913\_(+)\_3272950\_3273075 HitID: NC\_011353\_(+)\_4117246\_4117371  
 rank=1 bitscore=31.6 eval=60.0 perc\_ident=65.85 perc\_cons=68.29 perc\_gaps=0.0  
 query\_cvg=100.0 subj\_cvg=100.0 alpha=65.85 beta=2 prob=0.9977269495434506  
 ATGCTGATTTTATTATTATGGGGAAGGTGTTATTATGAGTTTCATTATGCCGTAACG  
 ACAATGAACCTCGGGAATTAGTATAAGCAGCGCGAGAATAATAATCATTGTGCAAATGCTA  
 ATTTAA  
 >AA QryID: NC\_000913\_(+)\_3048950\_3049063 HitID: NC\_017641\_(+)\_3484449\_3484562  
 rank=1 bitscore=30.4 eval=128.0 perc\_ident=67.57 perc\_cons=67.57 perc\_gaps=0.0  
 query\_cvg=100.0 subj\_cvg=100.0 alpha=67.57 beta=3 prob=0.9975522218261237  
 TTGAATAAGACAATATTAAAGAGCTAAAAAATGTCAAAAAACACTAAATCAAAAAATAAT  
 GGCATTAGAAAAATATAATGCGAAAACGGAGGTGAAATTAGTTTATTTCAAATGA  
 >AA QryID: NC\_000913\_(-)\_2902161\_2902307 HitID: NC\_012125\_(-)\_3010730\_3010876  
 rank=1 bitscore=47.4 eval=0.002 perc\_ident=58.33 perc\_cons=64.58 perc\_gaps=0.0  
 query\_cvg=100.0 subj\_cvg=100.0 alpha=-2.09 beta=1 prob=0.9970088898909029  
 GTGTTCCCCGCGCCAGCGGGGATAAACCGACGTGGTCATGGGTGCTGCTGTTGCAGAGCC  
 AGTGTTCCTCCGCGCCAGCGGGGATAAACCGAGCAGATACACGGCTTTGTATTCCGTGCGC  
 CCGTGTTCCTCCGCGCCAGCGGGGATAA  
 >AA QryID: NC\_000913\_(-)\_1268699\_1268818 HitID: NC\_017652\_(-)\_1453633\_1453752  
 rank=1 bitscore=40.4 eval=0.13 perc\_ident=56.41 perc\_cons=61.54 perc\_gaps=0.0  
 query\_cvg=100.0 subj\_cvg=100.0 alpha=56.41 beta=2 prob=0.9939704934403957  
 TTGGCAACCCGAGCTGGAAGCCTCATCCAGAGCACTCATGAAATGACTGTAAACAGCTGTT  
 GAAAAACCGGAATGCACTCTTCATTGCAAACATTTACAGGGATGAAGTGAAGATGAATTGA  
 >AA QryID: NC\_000913\_(-)\_1269234\_1269353 HitID: NC\_017652\_(-)\_1453633\_1453752  
 rank=1 bitscore=42.0 eval=0.044 perc\_ident=56.41 perc\_cons=66.67 perc\_gaps=0.0  
 query\_cvg=100.0 subj\_cvg=100.0 alpha=32.44 beta=2 prob=0.9932317750369725  
 TTGGCAACCCGAGCTGGAAGCATCATCCAGAGCACTCATGAAACGACTGCAACAGCTGTT  
 GAAAAGCCGGAATGTACTCTTTATTGCAAACATTTACAGGGATGAAGTGAAGATGAATTGA  
 >AA QryID: NC\_000913\_(+)\_1752529\_1752651 HitID: NC\_017644\_(+)\_1730710\_1730847  
 rank=1 bitscore=40.8 eval=0.098 perc\_ident=63.89 perc\_cons=63.89 perc\_gaps=0.0  
 query\_cvg=90.0 subj\_cvg=80.0 alpha=54.31 beta=8 prob=0.992836876182098  
 GTGCTGACAATTCAGCAGCCTGATATTAAGCATTCAACTAATACGCTGCTGACTCTGTCC  
 CCAACACCAGATATTTTCCCTAACCCGATAGTGATGAGAAAAGATTAACGCCGATAAAC  
 TAA  
 >AA QryID: NC\_000913\_(-)\_692641\_692733 HitID: NC\_013716\_(-)\_733466\_733573  
 rank=1 bitscore=32.0 eval=52.0 perc\_ident=67.86 perc\_cons=67.86 perc\_gaps=0.0  
 query\_cvg=93.33 subj\_cvg=80.0 alpha=58.81 beta=1 prob=0.992616612934835  
 GTGGGCCTTGTTTTTCTCTTTATCCCATCTTTATTGCAATGCTTGCGCCTTTTTCC  
 TGTGGCGTGAATAATTTCTTATAGGCCGGTGA  
 >AA QryID: NC\_000913\_(+)\_1887790\_1887921 HitID: NC\_009792\_(-)\_1136526\_1136660  
 rank=1 bitscore=45.1 eval=0.005 perc\_ident=53.49 perc\_cons=55.81 perc\_gaps=0.0  
 query\_cvg=100.0 subj\_cvg=97.73 alpha=52.88 beta=8 prob=0.9916073150011555  
 GTGTTGCTGCTCATCGCAACCCCAAATGATATACATGCCGTTAACATAATATTAACCTCAT  
 CATACCAGCTTGATAATTACCCAACGAAAAGGTTGCGAAGCGCTCACTATTTATTTTAA  
 TCTTTACCGTAA  
 >AA QryID: NC\_000913\_(-)\_1103016\_1103123 HitID: NC\_009792\_(+)\_1882829\_1882954  
 rank=1 bitscore=41.2 eval=0.083 perc\_ident=62.86 perc\_cons=68.57 perc\_gaps=0.0  
 query\_cvg=100.0 subj\_cvg=85.37 alpha=24.53 beta=3 prob=0.9892171056886454  
 TTGGTTGTTAACGCAACCTGTATTTTGTTAACGCTGCGTTACGATGGAAAGTATGTCTGC  
 GGAAATATTTTAATAAATCAACCCGCGCGTTGTATTTTCTTTTTTAG  
 >AA QryID: NC\_000913\_(-)\_3550856\_3550975 HitID: NC\_017651\_(-)\_3850488\_3850634  
 rank=1 bitscore=42.4 eval=0.033 perc\_ident=60.47 perc\_cons=65.12 perc\_gaps=9.3  
 query\_cvg=100.0 subj\_cvg=89.58 alpha=21.04 beta=5 prob=0.9889101124643196  
 GTGTCACAATTCCAAATCTTTATTAACAACCTAACCTAAAACGACGCTGATCCAGCGTGAA  
 TACTGGTTTCCCTTATGTTTCATCAGATTCATTTAAGCAAGGGTTTCTTCTTCATTCCTGA  
 >AA QryID: NC\_000913\_(-)\_984972\_985097 HitID: NC\_016514\_(-)\_1591882\_1592007  
 rank=1 bitscore=42.7 eval=0.032 perc\_ident=50.0 perc\_cons=67.5 perc\_gaps=0.0  
 query\_cvg=97.56 subj\_cvg=97.56 alpha=17.93 beta=4 prob=0.9869255192432593  
 ATGCCGAAAAAACAGGACTTTGGTCCTGTTTTTTTTATACCTTCCAGAGCAATCTCACGT  
 CTTGCAAAAACAGCCTGCGTTTTTCATCAGTAATAGTTGGAATTTTGTAATCTCCCGTTA  
 CCCTGA  
 >AA QryID: NC\_000913\_(+)\_709969\_710124 HitID: NC\_016856\_(+)\_757442\_757591

rank=1 bitscore=38.5 evalue=0.93 perc\_ident=52.94 perc\_conserv=62.75 perc\_gaps=3.92  
 query\_cvg=100.0 subj\_cvg=100.0 alpha=28.23 beta=2 prob=0.98613675825633  
 ATGAAAACCACAAGTCCCTGGCAAATATTGTTAATAAAACGTGGCACAGCTTACATTTA  
 CAACGGCAAGGCCACTTGAACACCGGGACATTGTACAGGTACAACAGCAAAAGTTACAAA  
 TTTGTAGCAATTATTTTATTGGCATTATCTATTAA  
 >AA QryID: NC\_000913\_(-)\_4010899\_4011045 HitID: NC\_015968\_(-)\_3517198\_3517317  
 rank=1 bitscore=44.7 evalue=0.013 perc\_ident=58.97 perc\_conserv=71.79 perc\_gaps=0.0  
 query\_cvg=81.25 subj\_cvg=100.0 alpha=53.45 beta=17 prob=0.9279256744739988  
 ATGGATTTTGAATTTAGGGAAGGCGGCAAGTTTATTCATCCCCGGGAGCTTACTGAAGTA  
 AGTGACCGGGGTGGAGAAACGCAGCCAACGCACCATAAATTTAAAGACGAAGGATTTTA  
 GCCGTCCAGATGTTTACACATCCATAA  
 >AA QryID: NC\_000913\_(-)\_2520540\_2520698 HitID: NC\_018661\_(+)\_1522679\_1522837  
 rank=1 bitscore=69.7 evalue=4.0E-10 perc\_ident=100.0 perc\_conserv=100.0 perc\_gaps=0.0  
 query\_cvg=100.0 subj\_cvg=100.0 alpha=72.54 beta=59 prob=0.7043264849051207  
 GTGAAAGATATTTTATTTCTTCCGGCGTTGGTTTTGGTATTGGTGCTTTGTTTACAATC  
 GTGCGCTTGCTATTCTGTACCAAATGTATTACCGGGTATATTATCCATTGTGTTTATG  
 TATGTCGGATATCTGGTGGTGAAATACTTTATGCCATGA

• ***Mycobacterium tuberculosis* H37Rv uid57777**

**vsORFs**

>AA QryID: NC\_000962\_(+)\_3597952\_3598041 HitID: NC\_019965\_(+)\_3629272\_3629361  
 rank=1 bitscore=96.9 evalue=1.0E-18 perc\_ident=100.0 perc\_conserv=100.0 perc\_gaps=0.0  
 query\_cvg=100.0 subj\_cvg=100.0 alpha=56.29 beta=9 prob=0.9999578085549663  
 ATGACGGAGGTTCCGATGGCCAAGCGTGGCCGTAAGAAGCGTGACCGCAAGTACAGCAAG  
 GCCAACACGCGCAAGCGGCCCAATTCCTAA

**sORFs**

>AA QryID: NC\_000962\_(+)\_3331854\_3332048 HitID: NC\_019952\_(+)\_3427771\_3427965  
 rank=1 bitscore=93.2 evalue=3.0E-17 perc\_ident=81.25 perc\_conserv=81.25 perc\_gaps=0.0  
 query\_cvg=100.0 subj\_cvg=100.0 alpha=43.75 beta=98 prob=0.9999559694862902  
 ATGGCCGCTGTGTGCGATATCTGCGGGAAAGGCCCGGCTTCGGCAAGTCGGTGTGCGAC  
 TCCCACCGCCGACACGACCGCCGGTGGGATCCGAACATCCAGACTGTGCACGCCGTGACC  
 CGTCCCGGCGGCAACAAGAAGCGACTCAACGTTTGCACATCCTGCATCAAGGCGGGCAAG  
 ATCACCCGCGGCTGA  
 >AA QryID: NC\_000962\_(-)\_2124830\_2125048 HitID: NC\_020245\_(-)\_2095945\_2096163  
 rank=1 bitscore=66.6 evalue=4.0E-9 perc\_ident=62.5 perc\_conserv=62.5 perc\_gaps=0.0  
 query\_cvg=100.0 subj\_cvg=100.0 alpha=62.5 beta=49 prob=0.9959664191419434  
 TTGCTGATGTACGTGTGCTTGTGCGTCGGCGTCACCAACCAACCGTGTGTGACGCCGTG  
 GCGCGAGGTGCGTCGACCTCCAAAGAAGTGGCCGCTGTGTGCGGGGCTGGCGGCGACTGC  
 GGACGATTGCCGGCGACACTGCGAGCTATCATCGCAGCCGCCGACTCAACCCAACCCAA  
 CTCGACCCCGCAGGTGCGACGAGCGACGCCGTTTGCTGA  
 >AA QryID: NC\_000962\_(+)\_1371529\_1371702 HitID: NC\_002755\_(+)\_1371017\_1371190  
 rank=1 bitscore=99.8 evalue=4.0E-19 perc\_ident=100.0 perc\_conserv=100.0 perc\_gaps=0.0  
 query\_cvg=100.0 subj\_cvg=100.0 alpha=100.0 beta=70 prob=0.9950166183475792  
 TTGTACTCCGGCGCTATGAAGTCGATCTCCGTCGGTGAGCTGCGCCAGAATCCCGCTCCC  
 ATGATCGCCGACCTCGAACGGGGTGAGCCATACGCGCTGACCCGCCACAACACCGGATC  
 GGAACGATCATTCCTGCCGTCTCGTCGGCAACACTCATTCCCCGGAAGCCTAG  
 >AA QryID: NC\_000962\_(-)\_2260021\_2260308 HitID: NC\_020245\_(-)\_2208322\_2208561  
 rank=1 bitscore=140.0 evalue=3.0E-31 perc\_ident=97.47 perc\_conserv=98.73 perc\_gaps=0.0  
 query\_cvg=83.16 subj\_cvg=100.0 alpha=56.74 beta=18 prob=0.9919473709845524  
 GTGCATCGGCAATCCATCCAAGGTCACCGACACAAGGATGGTGCACCAAGTGAGCTTCGCG  
 TGCTCCCATCAAGATCCACGGCGGCGGTGCGCACCACTTGGGGCCGGGCGTTGCTGCTC  
 GGCTCGGGTTTCGGCGCTAGGCTGGATCATCGACCGCGTCACCAACGACAAAGCGTCCGGA  
 ATCGCCAGGATCCCAACGACTGGTGGGAGAGCACGAGATCCACCTACATCGTCGATC  
 GCATCAGAAAGGTGCGACCGGGGACTTGCGCGCGGCCAAAGCGGCTAA  
 >AA QryID: NC\_000962\_(-)\_2453458\_2453736 HitID: NC\_016768\_(+)\_1962686\_1962964



rank=1 bitscore=103.0 evalue=3.0E-20 perc\_ident=71.74 perc\_conserv=71.74 perc\_gaps=0.0  
 query\_cvg=100.0 subj\_cvg=100.0 alpha=71.74 beta=38 prob=0.9870995756978271  
 ATGAGCCAAGCCGAGAGGAACGACCCCATGGCACGCAGCGGACCAGACACTAGCGGCGGC  
 ACAGCCCCCGGGCCGGGGGCGCCGGTGGTAATCGACTGTGACGATTGCGCGGCGCGCGGA  
 TCTGGATGCCGCGACTGTGTGGTCAGCGTGCTCATCGGGGTACCGGAAAGCCTGTGCGCAT  
 GACGAGCGTGCTGCGTTGGAAGTGCTCGCCGATGTCGGATTGGCCCCCTCGGTTGCGCCTG  
 GTGCCGGTCCGCCGCCAGCGCGGATCCGGTGTGCGGTAA  
 >AA QryID: NC\_000962\_(-)\_3700356\_3700526 HitID: NC\_019952\_(-)\_3818133\_3818303  
 rank=1 bitscore=86.7 evalue=3.0E-15 perc\_ident=100.0 perc\_conserv=100.0 perc\_gaps=0.0  
 query\_cvg=100.0 subj\_cvg=100.0 alpha=100.0 beta=12 prob=0.985057124229441  
 ATGAACGGCGACAGCGCCTCCACCATCGACATCGACAAGGCTGTTACCCGCACACCCGTT  
 CGCCGGATCGTGCCTTCGGCGCTGGATCGGCTGTGGTTGCGGCAGTCCCAGCCTAGGCGC  
 TATCGGTTCTCGAGGACTCGTGATGGCAGCGCGCTGAATCGACTCTGA  
 >AA QryID: NC\_000962\_(+)\_1014394\_1014555 HitID: NC\_017026\_(+)\_1015002\_1015163  
 rank=1 bitscore=79.3 evalue=5.0E-13 perc\_ident=100.0 perc\_conserv=100.0 perc\_gaps=0.0  
 query\_cvg=100.0 subj\_cvg=100.0 alpha=100.0 beta=9 prob=0.9850494596656049  
 TTGGTGGTGCATATCGTCCGTCTGTGATCGAGACCACAGCACCGACCGACTCCGCGATT  
 ACTCCCATCATGGTCCGGGAAATCAACATCGGTGAGATCCCCCTAGGCCTCAGGCTGGGC  
 AGCGACACCACACTGCTCGACGCCGCTCTCGCGGGTGGGTAA  
 >AA QryID: NC\_000962\_(-)\_3435615\_3435713 HitID: NC\_017528\_(-)\_3429907\_3430005  
 rank=1 bitscore=52.0 evalue=5.0E-5 perc\_ident=100.0 perc\_conserv=100.0 perc\_gaps=0.0  
 query\_cvg=100.0 subj\_cvg=100.0 alpha=100.0 beta=3 prob=0.9850402818158946  
 TTGGTGTGTCGAGGTGCCACCGGATAATCCTGAGGTCTAGCGGGCTGGGTATCGGCG  
 CTGGCCGACAAATGGATGTTTCGCATCGCGGGTGGGTAA  
 >AA QryID: NC\_000962\_(+)\_1219089\_1219217 HitID: NC\_017528\_(+)\_1219966\_1220094  
 rank=1 bitscore=60.1 evalue=2.0E-7 perc\_ident=100.0 perc\_conserv=100.0 perc\_gaps=0.0  
 query\_cvg=100.0 subj\_cvg=100.0 alpha=100.0 beta=4 prob=0.9850392242733381  
 GTGTGATCGTTGCCGCTGAATTGGCGCCGATGACCGCAACCGGTATCGCCGCTACGCCG  
 GCCCGAGGCGGGTACACCACGGTTTTTCGAGGGATGGCAATATCCGGGAGTGCGCCGGCTG  
 GCGGCCTAA  
 >AA QryID: NC\_000962\_(-)\_2538550\_2538645 HitID: NC\_002755\_(-)\_2535754\_2535849  
 rank=1 bitscore=53.9 evalue=1.0E-5 perc\_ident=100.0 perc\_conserv=100.0 perc\_gaps=0.0  
 query\_cvg=100.0 subj\_cvg=100.0 alpha=100.0 beta=3 prob=0.9850388164958612  
 GTGGGGAGGTTGCTGCCGACGGCCGAACCTCATTTCTCAACACGGCTCCAAGCCGGTAGGC  
 ATCGTCGCCACCGACGACATCGAGGCCTTGGCCTAG  
 >AA QryID: NC\_000962\_(+)\_4080930\_4081064 HitID: NC\_002755\_(+)\_4073171\_4073305  
 rank=1 bitscore=68.6 evalue=7.0E-10 perc\_ident=100.0 perc\_conserv=100.0 perc\_gaps=0.0  
 query\_cvg=100.0 subj\_cvg=100.0 alpha=100.0 beta=5 prob=0.985037825571317  
 GTGACTGGACGCAAGGCCGGTGGGGCCCCCTACACCGTCACCATCCCGGAGTTCGGAGCC  
 GCAGCTTTGCGCGAGCAGCGGGCACTGGTCATCCCGTTTCGACCCGGTGTTCGCGCCCCG  
 CGCGGCACCCGCTAG  
 >AA QryID: NC\_000962\_(+)\_1976424\_1976519 HitID: NC\_017528\_(+)\_1975805\_1975900  
 rank=1 bitscore=48.5 evalue=5.0E-4 perc\_ident=100.0 perc\_conserv=100.0 perc\_gaps=0.0  
 query\_cvg=100.0 subj\_cvg=100.0 alpha=100.0 beta=2 prob=0.9850377691375074  
 GTGTGGTGCCCAACGCCGTGCTGCCAGCCTCCGGCAAGCTCGACAGCATCACCGCGGAG  
 CCGGTTGGCCGCGCGCTGCGGGGACGGCGCGCTTGA  
 >AA QryID: NC\_000962\_(+)\_380442\_380540 HitID: NC\_002755\_(+)\_380503\_380601  
 rank=1 bitscore=43.5 evalue=0.018 perc\_ident=100.0 perc\_conserv=100.0 perc\_gaps=0.0  
 query\_cvg=100.0 subj\_cvg=100.0 alpha=100.0 beta=1 prob=0.9850363736961727  
 GTGACACCACCGCATCGACCGCATACCAATGAGGTTGTCACCGAACCGTATACGGCCCCAC  
 CCGCCGCTATGGTTAACGCTGGCCACCGACCCCTATTGA  
 >AA QryID: NC\_000962\_(-)\_1623124\_1623237 HitID: NC\_018143\_(-)\_1623130\_1623243  
 rank=1 bitscore=52.0 evalue=5.0E-5 perc\_ident=100.0 perc\_conserv=100.0 perc\_gaps=0.0  
 query\_cvg=100.0 subj\_cvg=100.0 alpha=100.0 beta=2 prob=0.9850349326001993  
 ATGTTCTCGGCCAGGCAACGATCTGGGCAGGTTGGGCGATCCTCTGTGGCAGGCTCCCG  
 GTAGCCACCGGCCTCGCCGATTTCGTCGGCATTGTTGTTGTCGCGTCTCCGTAA  
 >AA QryID: NC\_000962\_(-)\_3822122\_3822217 HitID: NC\_002755\_(-)\_3812999\_3813094  
 rank=1 bitscore=45.8 evalue=0.003 perc\_ident=100.0 perc\_conserv=100.0 perc\_gaps=0.0  
 query\_cvg=100.0 subj\_cvg=100.0 alpha=100.0 beta=1 prob=0.9850344883693242  
 ATGCGCCGCACCTTCCTCATCTGCCCCACGCGTACCGACCCGGACCGACTACGCGAGGCG  
 GCCATATCGCTAGCCCTGTGGCGCCGGGACGAATGA  
 >AA QryID: NC\_000962\_(-)\_3232513\_3232608 HitID: NC\_002755\_(-)\_3226665\_3226760

rank=1 bitscore=46.6 evalue=0.002 perc\_ident=100.0 perc\_conserv=100.0 perc\_gaps=0.0  
 query\_cvg=100.0 subj\_cvg=100.0 alpha=100.0 beta=1 prob=0.9850338190996897  
 ATGGCGGCACCATCGCCGCAACAAGTGTGCGCATGGTTCTGGATCAGGTCGTCAGTCTGT  
 AAGGCTGGGGCCGTGCCAACGCTCGACTGGAGGTGA  
 >AA QryID: NC\_000962\_(+) 1957266\_1957385 HitID: NC\_002755\_(+) 1948124\_1948243  
 rank=1 bitscore=47.4 evalue=0.001 perc\_ident=100.0 perc\_conserv=100.0 perc\_gaps=0.0  
 query\_cvg=100.0 subj\_cvg=100.0 alpha=100.0 beta=1 prob=0.9850331428055461  
 GTGGCGGCCGATCTGAACAGCTTCGTGGGGGGATCCGCTTCGTCAACCAACGCGGAAAGC  
 ATGGCTTTGGCCTTCCGCGGTGCGTCCACATGAGTGTCAATATAGCTGGACTAACATGA  
 >AA QryID: NC\_000962\_(-) 2179566\_2179658 HitID: NC\_002755\_(-) 2176921\_2177013  
 rank=1 bitscore=47.4 evalue=0.001 perc\_ident=100.0 perc\_conserv=100.0 perc\_gaps=0.0  
 query\_cvg=100.0 subj\_cvg=100.0 alpha=100.0 beta=1 prob=0.9850331428055461  
 ATGCGGTTTGGCTCCCTTGCGCTGGTGCCTACGACTCGGCCATCAAGCATTTCATGGCCA  
 CGCCCGTCGTCGGTGCGCCGGCTACGGATGTGA  
 >AA QryID: NC\_000962\_(-) 4360028\_4360123 HitID: NC\_019965\_(-) 4370554\_4370649  
 rank=1 bitscore=55.8 evalue=3.0E-6 perc\_ident=100.0 perc\_conserv=100.0 perc\_gaps=0.0  
 query\_cvg=100.0 subj\_cvg=100.0 alpha=100.0 beta=2 prob=0.9850317056806246  
 GTGAGTACGCATTGTCAATGTTTTGACATGGATCGGCCGGGTTCGGAGGGCGCCATAGTC  
 CTGGTCGCCAATATTGCCGCAGCTAGCTGGTCTTAG  
 >AA QryID: NC\_000962\_(-) 2270447\_2270563 HitID: NC\_020245\_(-) 2223745\_2223861  
 rank=1 bitscore=58.2 evalue=6.0E-7 perc\_ident=100.0 perc\_conserv=100.0 perc\_gaps=0.0  
 query\_cvg=100.0 subj\_cvg=100.0 alpha=100.0 beta=2 prob=0.9850295861012299  
 ATGCTCGGCGACGAAGTTCGAGCTCAGCGTGGCGTCTTCCCTCGAAAGAAGGTGCGCAC  
 GAAACCCGGGAGGCTTCACTATGTGAAGGTCACTCAACCTCGAACTGGCCGGCTGA  
 >AA QryID: NC\_000962\_(-) 522173\_522283 HitID: NC\_002755\_(-) 523622\_523732  
 rank=1 bitscore=52.0 evalue=4.0E-5 perc\_ident=100.0 perc\_conserv=100.0 perc\_gaps=0.0  
 query\_cvg=100.0 subj\_cvg=100.0 alpha=100.0 beta=1 prob=0.9850291156336713  
 TTGTGAGCCGGTTCGCGACCCGGATGCGCTTGCCGGCGGTGACGGGTCCGTATATGGTG  
 CTCGGCGCAGTGAATGTGGTTCAGGCCAGTGGGTGACGACCGCGCTAG  
 >AA QryID: NC\_000962\_(-) 4319855\_4319956 HitID: NC\_018143\_(-) 4320033\_4320134  
 rank=1 bitscore=52.4 evalue=3.0E-5 perc\_ident=100.0 perc\_conserv=100.0 perc\_gaps=0.0  
 query\_cvg=100.0 subj\_cvg=100.0 alpha=100.0 beta=1 prob=0.9850287541092613  
 ATGGTCGAGATGCTGGGTGTGTGTGTAGTCGCGACGGATCTCGACGGGCATCGGATTGTG  
 TTGCGCGACTCTGAAAAGACGCTGAAAATGAGAAACCGATAG  
 >AA QryID: NC\_000962\_(-) 11555\_11692 HitID: NC\_017528\_(-) 11560\_11697  
 rank=1 bitscore=79.3 evalue=5.0E-13 perc\_ident=100.0 perc\_conserv=100.0 perc\_gaps=0.0  
 query\_cvg=100.0 subj\_cvg=100.0 alpha=100.0 beta=5 prob=0.9850287315035453  
 GTGCTGGTTCGCTTACATAGACGAGTCCGGCAATACCGGAGACCCCGCCAACGGCGGATCC  
 ATGACTTTTCGCTCTAGGGTGCCTGCTCGTGGACGCCGACAACCGGCCGACCGCGTTCGAT  
 GGGTTGCTGAGCTTCTAG  
 >AA QryID: NC\_000962\_(-) 4359823\_4359951 HitID: NC\_020245\_(-) 4252679\_4252807  
 rank=1 bitscore=59.7 evalue=2.0E-7 perc\_ident=100.0 perc\_conserv=100.0 perc\_gaps=0.0  
 query\_cvg=100.0 subj\_cvg=100.0 alpha=100.0 beta=2 prob=0.985028228428318  
 GTGACACCCGGCTGATCGCCCAAGCGGTGCATCATGCGCGCGGATTCAACGGGTACTG  
 CGAATACCGGCGCGGGGTGGATCCAGCGGCCGAGCCGGCGTGAATGCCGGAGGCCAACC  
 GGACGGTGA  
 >AA QryID: NC\_000962\_(+) 577506\_577613 HitID: NC\_017026\_(+) 577884\_577991  
 rank=1 bitscore=60.5 evalue=1.0E-7 perc\_ident=100.0 perc\_conserv=100.0 perc\_gaps=0.0  
 query\_cvg=100.0 subj\_cvg=100.0 alpha=100.0 beta=2 prob=0.985027493795716  
 GTGGAGGTCAAGACGCCCGCCGGTGTGGGCTGGTGGCGCTCACCCCGTTCCGGACTCAG  
 AAATTCGCGATCACAATTTGCGCGTTCAAGTCATTGGCATGCATGTGA  
 >AA QryID: NC\_000962\_(+) 2538422\_2538553 HitID: NC\_002755\_(+) 2535626\_2535757  
 rank=1 bitscore=60.8 evalue=1.0E-7 perc\_ident=100.0 perc\_conserv=100.0 perc\_gaps=0.0  
 query\_cvg=100.0 subj\_cvg=100.0 alpha=100.0 beta=2 prob=0.9850272163995435  
 ATGTGGGCGCCGGTGTCTGGATAGCGACATTGCCGCAACGCCCGGTTGGTCAGCAAATG  
 GTGCCCATGCTGGCGACCAACGGGACCTCCGGCGCGGTAAGGCAGCCGGGCTCCAGTAAT  
 CCCAGCGGCTAG  
 >AA QryID: NC\_000962\_(+) 3642982\_3643116 HitID: NC\_002755\_(+) 3637882\_3638016  
 rank=1 bitscore=68.2 evalue=1.0E-9 perc\_ident=100.0 perc\_conserv=100.0 perc\_gaps=0.0  
 query\_cvg=100.0 subj\_cvg=100.0 alpha=100.0 beta=3 prob=0.9850265815720285  
 GTGGCTCCTCGGCTCGAAATTCTCCAAGAAGGACGACAGGACTTAGGCGCCGTGATAGAT  
 GCCGCTGTGGGCGCGCACTGTCTGGTGTGCTCGGCAACATCCATTGGTGGTTCCGAAC

GCCAACCAGCTGTAA

>AA QryID: NC\_000962\_(+)\_876424\_876570 HitID: NC\_017026\_(+)\_876948\_877094  
rank=1 bitscore=55.1 evalue=1.0E-5 perc\_ident=100.0 perc\_conserv=100.0 perc\_gaps=0.0  
query\_cvg=100.0 subj\_cvg=100.0 alpha=100.0 beta=1 prob=0.9850262652099606  
TTGGCTCCGAACATGGCCAGCATCAGCGCCAGCGAGCATACCGCCGCTGCCATGCGGGTG  
TCGGGCAGCAACAGGCCCCACGGCGACCAGGAGCCTCCAGCGCACCGGTGATGGTGACCAG  
CAGGCCGGGCGCAAGCAGCCCCGGGTGA

>AA QryID: NC\_000962\_(-)\_3719764\_3719871 HitID: NC\_002755\_(-)\_3717373\_3717480  
rank=1 bitscore=55.1 evalue=5.0E-6 perc\_ident=100.0 perc\_conserv=100.0 perc\_gaps=0.0  
query\_cvg=100.0 subj\_cvg=100.0 alpha=100.0 beta=1 prob=0.9850262652099606  
TTGCGGTACAAGCCGCGCGCGCCGGTAGCCCTCGCCAGAGTGACCGGGTCCGCCGGGGCA  
ACCGTCAACGTTGACCGAGTACTACGGTGCGAGCCTGGGCATTGTGA

>AA QryID: NC\_000962\_(-)\_2497225\_2497416 HitID: NC\_017026\_(-)\_2490668\_2490859  
rank=1 bitscore=97.4 evalue=2.0E-18 perc\_ident=100.0 perc\_conserv=100.0 perc\_gaps=0.0  
query\_cvg=100.0 subj\_cvg=100.0 alpha=100.0 beta=7 prob=0.9850243840114443  
TTGCACGGCATCGGGTTGCCGTCGCCGGGCGGGCGGGCCGAACCTCTCGGAGATCTGCGGC  
CACATCGCGTCGCTGCCGGCGACCGCCGTGGGAGATGGGTTCGTCGAAGGGGTGGACGGC  
ATCGGGGATCGCCCTCGGGCGATGGCCAAGGTGCACCATGCCGGCGTGACGGGGTGCCA  
GCGCCAACCTGA

>AA QryID: NC\_000962\_(+)\_3893958\_3894080 HitID: NC\_002755\_(+)\_3887791\_3887913  
rank=1 bitscore=58.5 evalue=5.0E-7 perc\_ident=100.0 perc\_conserv=100.0 perc\_gaps=0.0  
query\_cvg=100.0 subj\_cvg=100.0 alpha=100.0 beta=1 prob=0.9850230078346842  
GTGTTGGGGTTCGATTTGGCCGGACCAGTCGTCACCAACGCTTGGCGTGCGCGCCAGGCGG  
GCGATCAGATCGCTTGACTACCAATCAATCTTGAGCTCCCGGGCCGATGCTCGGGCTAAA  
TGA

>AA QryID: NC\_000962\_(-)\_901365\_901472 HitID: NC\_002755\_(-)\_901274\_901381  
rank=1 bitscore=59.7 evalue=2.0E-7 perc\_ident=100.0 perc\_conserv=100.0 perc\_gaps=0.0  
query\_cvg=100.0 subj\_cvg=100.0 alpha=100.0 beta=1 prob=0.985021824504452  
GTGTCTTGCAAGAGTTATCGCCTTGACCGCACAACTCTGTATGGACCCCGCGCCAGCGCG  
GTCAACCTGCGCCGACCCGCGATCTGTGAGATTCTTTCGGTGACCTAA

>AA QryID: NC\_000962\_(-)\_4190718\_4190828 HitID: NC\_002755\_(-)\_4183031\_4183141  
rank=1 bitscore=62.0 evalue=4.0E-8 perc\_ident=100.0 perc\_conserv=100.0 perc\_gaps=0.0  
query\_cvg=100.0 subj\_cvg=100.0 alpha=100.0 beta=1 prob=0.9850195060663742  
GTGCTGCGGGTTCGCGCTGGGTTTGACCAAAGCCAGCCCAGTTTATCTGCCTGGTGTAAG  
GGACGTATCTTGCTGGCTGGGCAACTCGAGCATCGTAGCTCGTGGAATGA

>AA QryID: NC\_000962\_(+)\_2637491\_2637601 HitID: NC\_002755\_(+)\_2634822\_2634932  
rank=1 bitscore=62.4 evalue=4.0E-8 perc\_ident=100.0 perc\_conserv=100.0 perc\_gaps=0.0  
query\_cvg=100.0 subj\_cvg=100.0 alpha=100.0 beta=1 prob=0.9850190959977085  
ATGTGCCCCGACGCTCGATGCGCACCAATTGCAACCAACTCAGGTCTTACGCTGCCTGGAC  
GCCGAAGTAGCTCGATCCAGCGCCGACCCGACCCCACTACCGGCATCTGA

>AA QryID: NC\_000962\_(+)\_1163690\_1163827 HitID: NC\_002755\_(+)\_1163734\_1163871  
rank=1 bitscore=63.9 evalue=2.0E-8 perc\_ident=100.0 perc\_conserv=100.0 perc\_gaps=0.0  
query\_cvg=100.0 subj\_cvg=100.0 alpha=100.0 beta=1 prob=0.9850175398346066  
TTGGTGCATGGATCGGGTCCAAGCGCTACATTGCGCGTCAAGCCTCCACAGCCCGATTG  
GCAGAGCGAGCGGACAATCCGCGCTACGGGTGCTGGCGTTTGCTAGTGCCGGTAATCTT  
CGAAAGAGTCGCTTCTAA

>AA QryID: NC\_000962\_(+)\_1170755\_1170907 HitID: NC\_002755\_(+)\_1170801\_1170953  
rank=1 bitscore=84.3 evalue=2.0E-14 perc\_ident=100.0 perc\_conserv=100.0 perc\_gaps=0.0  
query\_cvg=100.0 subj\_cvg=100.0 alpha=100.0 beta=4 prob=0.9850172772503237  
TTGCTGTTGTCAACTCTTGCGAGTTACGTGAGTGCGGCCGAGCACACGCTCGTATCGTC  
GTCACAGTCGAAGGGCGCGATCTTGAGTTCGACGTATCGACCTTCGCCCTTGTTGGGCCCG  
CAGCAGCTGCCCGAAGTCGAGCCGTGCGAGTAG

>AA QryID: NC\_000962\_(-)\_2582477\_2582644 HitID: NC\_002755\_(-)\_2578323\_2578490  
rank=1 bitscore=85.5 evalue=7.0E-15 perc\_ident=100.0 perc\_conserv=100.0 perc\_gaps=0.0  
query\_cvg=100.0 subj\_cvg=100.0 alpha=100.0 beta=4 prob=0.9850160070884078  
ATGACGGCGACATCTGTGGTTCGGCTGGGCACCAAGGCCGAGCCGAATACCTCGGCGGC  
CTACCTGAGTCGACGCTGAGGTACTGGCGTTACTGGGCACAGTCCGCGCAGCTATCGCC  
TTGGCCGACACACGTTTTGCGATATCGCCGACCTGGATGCGTGGGTAG

>AA QryID: NC\_000962\_(+)\_747979\_748098 HitID: NC\_020245\_(+)\_749721\_749840  
rank=1 bitscore=67.8 evalue=9.0E-10 perc\_ident=100.0 perc\_conserv=100.0 perc\_gaps=0.0  
query\_cvg=100.0 subj\_cvg=100.0 alpha=100.0 beta=1 prob=0.9850133546535038  
GTGCGGCGTCGCGGGATTCACTCGGCGATACGTGTCGCCGTTTTGGCTGACCGGACCG

GGCCAGGCTATTGTGGTTGCCGATCCACCGAAGACCGTCGGTCACCGAGCAATCGGTTGA  
 >AA QryID: NC\_000962\_(+)\_1728630\_1728761 HitID: NC\_002755\_(+)\_1728784\_1728915  
 rank=1 bitscore=68.6 eval=5.0E-10 perc\_ident=100.0 perc\_cons=100.0 perc\_gaps=0.0  
 query\_cvg=100.0 subj\_cvg=100.0 alpha=100.0 beta=1 prob=0.9850124706921974  
 ATGATTGATTCATCAGTCAATATTAAAGTCGCAGCTCACAACTATAATACGCCGGTGCAG  
 CGGACAATTGCGGAAGCGCCGGACGCCTCGCGGTCCGATGTCGCCTTTCCCTGCCTCGTC  
 GTCAATATCTGA  
 >AA QryID: NC\_000962\_(+)\_130581\_130706 HitID: NC\_002755\_(+)\_130572\_130697  
 rank=1 bitscore=72.8 eval=2.0E-11 perc\_ident=100.0 perc\_cons=100.0 perc\_gaps=0.0  
 query\_cvg=100.0 subj\_cvg=100.0 alpha=100.0 beta=1 prob=0.9850076825277734  
 ATGGCGTATCAGCGCCATGTCTACCGACTTGCGCATACTTCGCCGGGTGAGGTCGCCGGT  
 GAAGGCAGTCCGGACCCCTTTGGTCTGCGAGCGATGAATGCAGACGCCGTGTCGGATCTA  
 GCTTGA  
 >AA QryID: NC\_000962\_(+)\_4019074\_4019208 HitID: NC\_020245\_(+)\_3927887\_3928021  
 rank=1 bitscore=72.8 eval=4.0E-11 perc\_ident=100.0 perc\_cons=100.0 perc\_gaps=0.0  
 query\_cvg=100.0 subj\_cvg=100.0 alpha=100.0 beta=1 prob=0.9850076825277734  
 ATGGCCGACGGTCCCCTTGCCATCACGGCGAAATCGGTTTACATACATGGCTATTCGGTA  
 GATACGGCAGAGATTCCAACAGCTGTGCGTGGCCACCCGAATGCCGCGGGAACCGCGATC  
 AAGGACCGCCGCTGA  
 >AA QryID: NC\_000962\_(-)\_3202034\_3202177 HitID: NC\_020245\_(-)\_3125615\_3125758  
 rank=1 bitscore=86.3 eval=4.0E-15 perc\_ident=100.0 perc\_cons=100.0 perc\_gaps=0.0  
 query\_cvg=100.0 subj\_cvg=100.0 alpha=100.0 beta=3 prob=0.9850076034906874  
 ATGGACTGGCTTGTCGACGACCGGGGCGGCTGTCAGCGATCAGCGACCTGAGGCTGGCG  
 ATTCAAGACCAGTTCGTGACCGCATCACGTACCACTGCCTATTCGGGTGGGGCGCGTAAC  
 CACGCCGTGATCCCGGCCGGCTAG  
 >AA QryID: NC\_000962\_(-)\_3067972\_3068067 HitID: NC\_019951\_(-)\_3189590\_3189685  
 rank=1 bitscore=51.6 eval=6.0E-5 perc\_ident=96.77 perc\_cons=96.77 perc\_gaps=0.0  
 query\_cvg=100.0 subj\_cvg=100.0 alpha=96.77 beta=5 prob=0.9850073745231906  
 GTGGCACTGGCCAGTCACCTCGACATCCCCCTGCTGACCGCGGACCCGCGTCTGCGCCGG  
 GAGCCCGGGCTGACCTGCCACACCGAGTTCGTCTAG  
 >AA QryID: NC\_000962\_(-)\_3558629\_3558853 HitID: NC\_017528\_(-)\_3553028\_3553252  
 rank=1 bitscore=109.0 eval=4.0E-22 perc\_ident=100.0 perc\_cons=100.0 perc\_gaps=0.0  
 query\_cvg=100.0 subj\_cvg=100.0 alpha=100.0 beta=6 prob=0.9850046280356461  
 GTGCTCAGGAACGGGAGCAGCACCGTCGTCAGGCGAGCGCCAACCGCGAACCGTGACGCG  
 GCCGGTGGCGGCATCAAGATGCCGCCACCGGCCGCGCCGGATGCCCTGTACAACGGCCC  
 GACTACTCCGAAACCGACTGGGACGCGCTACGGGCCGCTTATCCACGTGACGCTGAACGG  
 GTGAAGCGGGCCATGTTTATTGTGTCAGCGGCAACCGAAACTGA  
 >AA QryID: NC\_000962\_(-)\_4320254\_4320433 HitID: NC\_002755\_(-)\_4312578\_4312757  
 rank=1 bitscore=100.0 eval=2.0E-19 perc\_ident=100.0 perc\_cons=100.0 perc\_gaps=0.0  
 query\_cvg=100.0 subj\_cvg=100.0 alpha=100.0 beta=4 prob=0.9849990694170873  
 GTGTGGCGAAGGTCTATGGGGTGGGTGGGCAAGAAGAAGTCGACGGCTGGGCAGTTGGCG  
 GGGACGGCTAACGAATTGACCAAGGAGGTGCTGGAGCGGGCCGTGCACCGCGAGTCGCCG  
 GTGATCCGGCCGACGTGGTAGTGGGAATCCCGCAGTGGATCGACGCCCAAAACAGATGA  
 >AA QryID: NC\_000962\_(-)\_986734\_986880 HitID: NC\_002755\_(-)\_986746\_986892  
 rank=1 bitscore=84.0 eval=2.0E-14 perc\_ident=100.0 perc\_cons=100.0 perc\_gaps=0.0  
 query\_cvg=100.0 subj\_cvg=100.0 alpha=100.0 beta=1 prob=0.9849936210961682  
 TTGAACGTCATCGCAATTCGCGAGTGGGTGAGTACCTGACGCTCCTGTGGTTTTCTCA  
 GGTGAGGGCATCAAAGTTAGCGGGACGGTGGTGTGTCTCGACGCTCTGCACGACCTCGGC  
 GTTGTTCGTCCGGAATATTGGGTTAG  
 >AA QryID: NC\_000962\_(+)\_3557099\_3557284 HitID: NC\_017528\_(+)\_3551494\_3551679  
 rank=1 bitscore=105.0 eval=8.0E-21 perc\_ident=100.0 perc\_cons=100.0 perc\_gaps=0.0  
 query\_cvg=100.0 subj\_cvg=100.0 alpha=100.0 beta=4 prob=0.9849924919979305  
 ATGGATCATCCTACTGAGCGGAATGGGCCAGCATCGCCGAACATACACGCGCCTCCAAC  
 TTCACCGCGACCTGTTACGAATGCCGCCTTACCCGCTGATCCTCACCTCCGAACGCTG  
 GTGGGGTCTGCCGAGGTGGTCACTGCATCACATACCCTCTTCTGTGCGCGGCAACTGAA  
 TACTGA  
 >AA QryID: NC\_000962\_(-)\_1634821\_1634979 HitID: NC\_002755\_(-)\_1634936\_1635094  
 rank=1 bitscore=88.6 eval=7.0E-16 perc\_ident=100.0 perc\_cons=100.0 perc\_gaps=0.0  
 query\_cvg=100.0 subj\_cvg=100.0 alpha=100.0 beta=1 prob=0.9849872551596914  
 ATGGTAGACCGGGTAACTGTGGCAGCAGAGCCGCGAGGGTCGATTACACGACTTCGCCGG  
 CATATCGGCACCGCTCGCCAGCCCGAACCGCGGTCAGGACAATTTTACACACGACCCGAT  
 GAAAATCGCTATCTGGGATTGATCAGTGTGACGCCCTAA

>AA QryID: NC\_000962\_(+)\_4057488\_4057649 HitID: NC\_002755\_(+)\_4049729\_4049890  
 rank=1 bitscore=90.1 eval=3.0E-16 perc\_ident=100.0 perc\_cons=100.0 perc\_gaps=0.0  
 query\_cvg=100.0 subj\_cvg=100.0 alpha=100.0 beta=1 prob=0.9849850996312893  
 TTGGTTGACCTGCTGCTTTTGTCCGCGAATTCACCGGAATTTGAACTGGACCTGGCCGGC  
 AATCGTGGGGCAGTCACTGTGAGCTGTAGCCATGCCAGCTGCACAGGAAGTGCATCCGG  
 ACGTCAAGGGAGGCCCCGACTGGTCCGGCCGCGCCGATCAATGA  
 >AA QryID: NC\_000962\_(+)\_838129\_838371 HitID: NC\_002755\_(+)\_840318\_840560  
 rank=1 bitscore=93.2 eval=4.0E-17 perc\_ident=100.0 perc\_cons=100.0 perc\_gaps=0.0  
 query\_cvg=100.0 subj\_cvg=100.0 alpha=100.0 beta=1 prob=0.98498051604753  
 ATGGGGGGCCCGCCGCGCCAGGTATCTCGGCGAAGATCCCCGGCGCTCGAGCGCTTTGTCTAG  
 AGGCCCCGTGCGGGTCTGCTGACGACGGCTATCCGGGCGGTGCGGGTTTCGCGGCGCGC  
 CCTGTGCCCGGCACCGCCCGCCGTTTGTCTGCAACGCCGCCGCGACCCGTGAGCCGTCCA  
 GCAGCTGGCGCCTGCGAAACGTGTGGAAGCGCTGCATGCGGTGCCGGATCGCGATATCGT  
 TGA  
 >AA QryID: NC\_000962\_(+)\_1617565\_1617729 HitID: NC\_018143\_(+)\_1617571\_1617735  
 rank=1 bitscore=97.8 eval=2.0E-18 perc\_ident=100.0 perc\_cons=100.0 perc\_gaps=0.0  
 query\_cvg=100.0 subj\_cvg=100.0 alpha=100.0 beta=1 prob=0.9849733826933016  
 ATGTTTGGCCACGAACGGAATCGCGACAGCGCCACGGCGTCGAGCCTCGCCATGCACCTA  
 GCCGGCGCCTTTGAACTCGTGAGCGGACCGAAGTGGACCGCCTGTCGCTTCGAGGCGGGC  
 ACAGTGCCTATTCCCTCGCAAGGGAAGCGCCGGTGGCAGGCGTGA  
 >AA QryID: NC\_000962\_(+)\_3457552\_3457764 HitID: NC\_017528\_(+)\_3451857\_3452069  
 rank=1 bitscore=113.0 eval=4.0E-23 perc\_ident=100.0 perc\_cons=100.0 perc\_gaps=0.0  
 query\_cvg=100.0 subj\_cvg=100.0 alpha=100.0 beta=2 prob=0.9849591479669438  
 TTGGATCACCCGCCGCTGCTGCGGCTGGTGTCCAGCCAGGCGATTGCCCGCGCTCGCAC  
 CCGCTCGGCGCGCGGGTTGTCTGCGGACCCGAAGATGACCTCGGCGACGATGTCTGAGCGC  
 GATCGGGCCGCGCGGTCTCGGAAACGGACCTCTCGCCATTGGCCAGGTGGCGAGCGC  
 CTTTCGGTCACGCGTTCATGGCCCCGCTCGTAG  
 >AA QryID: NC\_000962\_(-)\_2870482\_2870691 HitID: NC\_002755\_(-)\_2866627\_2866836  
 rank=1 bitscore=110.0 eval=2.0E-22 perc\_ident=100.0 perc\_cons=100.0 perc\_gaps=0.0  
 query\_cvg=100.0 subj\_cvg=100.0 alpha=100.0 beta=1 prob=0.9849523882775861  
 TTGGACCGTCGCCGTCGAGGCGGCGTTGCCGCGATGCTTGTCTGTAACGGGAGTTTCATGT  
 CGGTCAACCGCGCGCCGGGCTCGAACGTGAGCGATCTTGCATGGGAACCATGGCGAACTCA  
 GCGGCTGATTACGACGCGCGTAAAGGGGCGGACACTCGCTTCGCCCTGTACAGAAAGTCA  
 GCACTGTCATCGCTTTGGCCAGTCGCCTAG  
 >AA QryID: NC\_000962\_(+)\_1928856\_1929071 HitID: NC\_002755\_(+)\_1919658\_1919873  
 rank=1 bitscore=125.0 eval=9.0E-27 perc\_ident=100.0 perc\_cons=100.0 perc\_gaps=0.0  
 query\_cvg=100.0 subj\_cvg=100.0 alpha=100.0 beta=1 prob=0.984921959268686  
 ATGTCGTGACGGTGGGTACGGAGCCGAAGGCGTTGCCGTCGTCGACGACGCTGGCGAAT  
 AGGTTTGAAGTCCAGCCCCGAAGCCGCGGGCTTGAGGCTGATGAGGAAAACCGGCGCGTTG  
 CGCTCGTTGAACTGCTGGATCACATTGGGGCGTCATCGAGGTCGATCGACGGATACATCA  
 GGGAATGCATGGCCGCACCGTATCGACTCGGTCTGA  
 >AA QryID: NC\_000962\_(-)\_157681\_157812 HitID: NC\_020245\_(-)\_157911\_158036  
 rank=1 bitscore=53.1 eval=2.0E-5 perc\_ident=97.56 perc\_cons=100.0 perc\_gaps=0.0  
 query\_cvg=95.35 subj\_cvg=100.0 alpha=95.29 beta=1 prob=0.9846952497616841  
 TTGTGCGTGGGTGCTTGGCGCGTCCGGAGCCGCGTGACCCGGGTGTGTCAATCGCC  
 CAAGGTGTCCGGGCGGACGCTGAATCGTTAGCCAACCGCGATCTCGCGCTGCGGCCACGA  
 CATTGAACTGA  
 >AA QryID: NC\_000962\_(-)\_1272036\_1272191 HitID: NC\_002755\_(-)\_1271525\_1271680  
 rank=1 bitscore=87.8 eval=1.0E-15 perc\_ident=100.0 perc\_cons=100.0 perc\_gaps=0.0  
 query\_cvg=100.0 subj\_cvg=100.0 alpha=78.23 beta=33 prob=0.984500985516026  
 ATGGCGGCTTTTAGGCTCGCTGTCATGTGGATCGACGACTCGAGTGCCGACGTCATCAAG  
 GCTGACTTCGAGGCTCTCTACCACGGCGACATGCTGGTAGAGGGCGACACCTCCGAGCAG  
 CTCGAAGACTTGACCCGCTGCCACCGCGAGCTGA  
 >AA QryID: NC\_000962\_(+)\_4319825\_4320040 HitID: NC\_018078\_(+)\_4307640\_4307855  
 rank=1 bitscore=104.0 eval=2.0E-20 perc\_ident=90.14 perc\_cons=90.14 perc\_gaps=0.0  
 query\_cvg=100.0 subj\_cvg=100.0 alpha=90.14 beta=5 prob=0.9844908743647276  
 ATGGTCTTCGACAAGCCCACCGTGAGTTGTCTATCGGTTTCTCATTTTCAGCGTCTTTTC  
 AGAGTCGCGCAACACAATCCGATGCCCGTCGAGATCCGTCGCGACTACACACACACCCAG  
 CATCTCGACCATCGCGACTCCGGCCGACGACGGCTAACGAGCAGCTTCGCCCCACCCGCC  
 CCCGCAGCAACAACAACGGCACGGCAGCAGCTGA  
 >AA QryID: NC\_000962\_(-)\_4317685\_4317897 HitID: NC\_017528\_(-)\_4312672\_4312908

rank=1 bitscore=121.0 evalue=1.0E-25 perc\_ident=98.57 perc\_conserv=100.0 perc\_gaps=0.0  
 query\_cvg=100.0 subj\_cvg=89.74 alpha=76.1 beta=8 prob=0.98437176689874  
 TTGGCTATCAGGGTGGACCTTGACGGGCGCAAAGACGCCTCGGGCCGGCCGATCCAAGAC  
 AGCCCGGGGCGTCTCGTCGATGCCGGGATTTCATGGCGCCGTCACCGTGGAGGCCGCGGAG  
 CTCGCGCTCAAGGAATTTGTCTGGGCGCATGCGTAGCCGGAATTCGTGCCATTCCTGGA  
 CTATCCGATCGAGCTGCGCAAGTTAATCAATAA  
 >AA QryID: NC\_000962\_(+)\_1282030\_1282218 HitID: NC\_019951\_(+)\_1337863\_1338051  
 rank=1 bitscore=51.2 evalue=1.0E-4 perc\_ident=74.19 perc\_conserv=74.19 perc\_gaps=0.0  
 query\_cvg=100.0 subj\_cvg=100.0 alpha=74.19 beta=29 prob=0.9842336994366719  
 ATGGGTGAATCGAAGTCCCCGCAAGAGTCCAGCTCAGAGGGTGAGACCAAGCGCAAGTTC  
 CGGGAAGCCCTCGACCGCAAGATGGCACAGTCGTCGAGCGGATCCGATCATAAGGATGGC  
 GGCGGCAAGCAGTCGCGGGCGCACGGTCCGGTGGCGAGCCGTCGGGAATTCCGCCGCAAG  
 AGCGGCTAG  
 >AA QryID: NC\_000962\_(+)\_2632565\_2632792 HitID: NC\_012943\_(-)\_1783799\_1784026  
 rank=1 bitscore=82.4 evalue=7.0E-14 perc\_ident=82.67 perc\_conserv=82.67 perc\_gaps=0.0  
 query\_cvg=100.0 subj\_cvg=100.0 alpha=82.67 beta=6 prob=0.9834778377146944  
 TTGCTTGCACTTCTGGCTCCGGGGCATAGCGACAAGTGTGCTGCTGGCTGTTGACGTGCTC  
 TTCGGGCAAGCGGACTTCACGCTTTCAAGCGTGCACTCGGCCGAACCTTGCCAGCGCGAAC  
 TCCACCAGCGGACACCTTCAGATCGCGATGGTTGTGCTGGCGCTGCTGATCGCCGGGCTC  
 ACGGCCGGAGGGGCTTTCCGCATGGCCAGCGGACTGGGCCACGCCTAA  
 >AA QryID: NC\_000962\_(-)\_3288026\_3288196 HitID: NC\_020245\_(-)\_3211664\_3211834  
 rank=1 bitscore=72.8 evalue=5.0E-11 perc\_ident=82.14 perc\_conserv=82.14 perc\_gaps=0.0  
 query\_cvg=100.0 subj\_cvg=100.0 alpha=82.14 beta=2 prob=0.9829573800223941  
 GTGACGGTGGCCGGCGACGGAGATGGGCTGGTGTGCTTGGCCTGAGCGCCATGTGCGATGTG  
 GCGTCGTTTCATGGGCGCCGTCGCCAACGTGAACCTCAGGGCGGAAAATCGGCGCCGGATT  
 TCGCCCTCAGTGCACGCTCGGCACCGGTTTAACTTCACGCGGTCAACGTGA  
 >AA QryID: NC\_000962\_(-)\_3848844\_3848999 HitID: NC\_018078\_(-)\_3839772\_3839927  
 rank=1 bitscore=57.8 evalue=1.0E-6 perc\_ident=78.43 perc\_conserv=78.43 perc\_gaps=0.0  
 query\_cvg=100.0 subj\_cvg=100.0 alpha=78.43 beta=7 prob=0.9827902705189049  
 TTGGCGGCGCTGTGCGCGCGGCGGGGCCCAAGCCGGGCAAGGCCGCGGCCAATGCCGCT  
 GACGCCGAGATCGCGTGGCTGCGCGCCGAGCTCGACACCGCACGCGAGGTGATCCGTGTG  
 CAGGGGGAACCTGTCCGCGCTCTTGAGAGGGCTCTGA  
 >AA QryID: NC\_000962\_(-)\_639972\_640106 HitID: NC\_002755\_(-)\_641424\_641558  
 rank=1 bitscore=74.7 evalue=1.0E-11 perc\_ident=100.0 perc\_conserv=100.0 perc\_gaps=0.0  
 query\_cvg=100.0 subj\_cvg=100.0 alpha=83.53 beta=1 prob=0.9827827848916948  
 ATGATCGAGTACGCGGTGACCCTCCACAGAAAGCCGCCCGGGCGCCAACTCACGACCACA  
 TGTGACCAAGGCCCGGGCACCATACCGTCCGGCTGACGCCAGCGGCCATGATTACTGT  
 GGCAGGCATGGGTGA  
 >AA QryID: NC\_000962\_(+)\_2959898\_2960095 HitID: NC\_017026\_(+)\_2953623\_2953820  
 rank=1 bitscore=95.9 evalue=6.0E-18 perc\_ident=83.08 perc\_conserv=83.08 perc\_gaps=0.0  
 query\_cvg=100.0 subj\_cvg=100.0 alpha=83.08 beta=1 prob=0.9825656474176786  
 GTGAATCAGCACAAAGAAGCCTGTGCAGTAGCGCGACGCTCGGCGTACCGGCACGAGTCC  
 GACGGCCCGCATGTCCATGCGGCCGCGGCCAGCGCCGAGGCCCGCGCAGGATACCGG  
 GATCTGCAGCTCCTCGTGCAGAACAGTTGCCGCAGTTCCGGTTCGGGTCAGTTCCGGCGAG  
 CGTGATGTTCCGCGCTAA  
 >AA QryID: NC\_000962\_(+)\_828947\_829159 HitID: NC\_009525\_(+)\_830253\_830465  
 rank=1 bitscore=80.5 evalue=3.0E-13 perc\_ident=80.0 perc\_conserv=80.0 perc\_gaps=0.0  
 query\_cvg=100.0 subj\_cvg=100.0 alpha=80.0 beta=5 prob=0.982463381818286  
 GTGGTCCGGGCGTCGACCACCTGCTCGGAGTGGGCTGCATGATGCCGCGCATCTTCAGTCG  
 TCGATACCGTGGTGCTGGCCAAACACGAGTTCTCCGCTGCCACGGTGGCCGACGGGTAC  
 AGCCGACGCGGGGCCGGTTCGGGGTTCGCGCGCGCGGCCTCCGGTGGCGGCACTTTCTC  
 GGTACAGAAATGCGCCGACGCAACGGCAAGCTGA  
 >AA QryID: NC\_000962\_(+)\_1113861\_1114112 HitID: NC\_018143\_(+)\_1113865\_1114116  
 rank=1 bitscore=164.0 evalue=1.0E-38 perc\_ident=100.0 perc\_conserv=100.0 perc\_gaps=0.0  
 query\_cvg=100.0 subj\_cvg=100.0 alpha=73.73 beta=17 prob=0.9822523006405806  
 ATGAGCACGAAATACTACCTGCAGAAGGTCCCTGTGCAAGCCGTCCAGCCGGGCTTTTCG  
 CTGGCCATTCCACACGATGGCGACTATCGCCTTTTCAGGTCGACTGCACGCAATGTGC  
 CAGCGAAGTGGCCAGCCGGTGATGATCAGACTCATGTGCGAGTCCGTGATGGTGGCCAG  
 CCGTGGGTCTTGGAATATGAAGCGGGCACGGCGGTAATCCGGCTTCTCGGTGTTTGCCAG  
 GCCGCTTCGTAG  
 >AA QryID: NC\_000962\_(-)\_31824\_31967 HitID: NC\_012943\_(-)\_31926\_32069

rank=1 bitscore=74.7 evalue=1.0E-11 perc\_ident=100.0 perc\_conserv=100.0 perc\_gaps=0.0  
query\_cvg=100.0 subj\_cvg=100.0 alpha=75.9 beta=16 prob=0.9821749032040168  
ATGGCTGATTCTGCGCTGCAGCAGCAACTCGACGAGGTGCGGGCTCTGCTCACTCGAGCG  
CGAGAAATTGTTGCGCCCCAATCCGATCGAGCCGCCACCGACATCGCACCCGATCCCGAC  
AGCACCAAGACCTGGCTCATCTAG

>AA QryID: NC\_000962\_(-)\_789524\_789799 HitID: NC\_002755\_(-)\_791498\_791773  
rank=1 bitscore=101.0 evalue=2.0E-19 perc\_ident=82.42 perc\_conserv=82.42 perc\_gaps=0.0  
query\_cvg=100.0 subj\_cvg=100.0 alpha=82.42 beta=1 prob=0.9821428103536816  
ATGGCTGCGTGGCGCGACACAAGCTGGCTGACCACGATCAGCCGCCGTCATGTCCCCATG  
CCGGTCACCGAGCTCCACGAACAACCGAGCTCCCGACCGGCATATTCGCCGGCTCCGGT  
TGTCCCACCCTGGTTGCTGCTAGGCCGTCGAGGCCGTCGCCACGCGCGAGGCGATCA  
CCGACGCCAGCGCGCGCGGACAAACAGGTCAATCCGAGCACGGAGCCATCCTCGATG  
CTACCGACAACCGAAGCGCGGCATTGCGCGTCTTGA

>AA QryID: NC\_000962\_(+)\_3429568\_3429750 HitID: NC\_020245\_(+)\_3353350\_3353532  
rank=1 bitscore=68.9 evalue=8.0E-10 perc\_ident=76.67 perc\_conserv=78.33 perc\_gaps=0.0  
query\_cvg=100.0 subj\_cvg=100.0 alpha=78.33 beta=5 prob=0.9821351960398654  
GTGGGTCCAACCCGCGATTGCGGGCAGCCGGCGGAGAGGGCGACCAAGAGACGTTATCGG  
TTCGCTCGGGGACTCATGGCCGGTCTGCTGGGCACGATGGCTCTCACGAGCGGCGGTGGT  
GTCGCTCGCGAGGATCCATTGGAACCTGATCCGCTAGCCCCGATCATCGACGATTCCAGG  
TAA

>AA QryID: NC\_000962\_(+)\_2968947\_2969078 HitID: NC\_002755\_(+)\_2965091\_2965222  
rank=1 bitscore=48.9 evalue=4.0E-4 perc\_ident=100.0 perc\_conserv=100.0 perc\_gaps=0.0  
query\_cvg=100.0 subj\_cvg=100.0 alpha=74.58 beta=15 prob=0.982108647464115  
GTGCCGTTTACCACGCGTGATGTCCAGGCATCCCTGATGCGAATCCCGGCCCCAGCGTCC  
AACACCACCGGGCTGACCGAGACCAGTCGCTGACGGTCGACAAGGTGACAACATCCCCC  
GCACCAGCCTGA

>AA QryID: NC\_000962\_(-)\_2364797\_2365093 HitID: NC\_018143\_(-)\_2364805\_2365101  
rank=1 bitscore=107.0 evalue=3.0E-21 perc\_ident=77.55 perc\_conserv=77.55 perc\_gaps=0.0  
query\_cvg=100.0 subj\_cvg=100.0 alpha=77.55 beta=11 prob=0.9817825394954935  
GTGTCGACTGCTCGAGGTCGCCGAGTCGGGCTACCGCGAATGACGTTACGACCGTGGTG  
CTCAACCCACCCCTGGCCACCCTGGAGGTGGCCGTGCTCGACGCCGACCGGCTACGGCGC  
GCGTTTCGGCGCATCGCGGGTGCCGCGTTGGGAAAACGGCTGCGGGAAGTGGATCGAAA  
GATGCCAAGGGACACAAAGGGGTTCCACGGGCGCCAAAGACTCCCAGTCCGACGGCGAAT  
CGCCGGATTAGTGACGGGCCCCGCGCGCCGATTGACGAGATGCTGTCGACAATCTTGA

>AA QryID: NC\_000962\_(+)\_1192235\_1192375 HitID: NC\_018143\_(+)\_1192240\_1192380  
rank=1 bitscore=85.5 evalue=6.0E-15 perc\_ident=100.0 perc\_conserv=100.0 perc\_gaps=0.0  
query\_cvg=100.0 subj\_cvg=100.0 alpha=80.71 beta=3 prob=0.9815179289176543  
ATGCAGAGTGTTTCGACAAATCTTTCCCAAGACATTTTATTGGTCGCACGATGGGCGTC  
GTCGTCGAGCGGTATGGCAGCACCGATTTGTCTTCCAGGGGAATGTTCTGACCGTTTCAT  
GACGTCGACTGTGTCCAATAG

>AA QryID: NC\_000962\_(+)\_1757438\_1757671 HitID: NC\_018143\_(+)\_1757444\_1757677  
rank=1 bitscore=132.0 evalue=5.0E-29 perc\_ident=100.0 perc\_conserv=100.0 perc\_gaps=0.0  
query\_cvg=100.0 subj\_cvg=100.0 alpha=83.53 beta=3 prob=0.9814858336342136  
ATGGTCGCGACCACTACGCACTTCCCGAAGCAAAAAGCGCCCTGCGGGCACATGGTTGAC  
GGCGATACCAACATCGAGCGGACGACGAAGGCCTTGCTACGACGACCTCAAGTTTTCC  
TGCGGCTGCCGCGAAATCCGGCATTCTACCACGACGGATCCATGCGGGTACGCACGATT  
CGACACGACGGCAAGGTGTTGAAGGACGAGCACAGCGGCGATCACGAAGCGTGA

>AA QryID: NC\_000962\_(-)\_2582675\_2582830 HitID: NC\_002755\_(-)\_2578521\_2578676  
rank=1 bitscore=63.9 evalue=2.0E-8 perc\_ident=78.43 perc\_conserv=78.43 perc\_gaps=0.0  
query\_cvg=100.0 subj\_cvg=100.0 alpha=78.43 beta=1 prob=0.9814086494137797  
GTGACCGCCGTTCTGCTACGGCAAACATCGGGATCTTGGTGTGCACTTCTCGGCGTTCT  
TCGGTTGTTAGATGCCATCGGGCTAATGGTTACTGTGCGGTCAATGGAAAGGATTTTGC  
GTCGGCCCTGGGACTGCCAAAGGGATTGGGACATAA

>AA QryID: NC\_000962\_(+)\_3547037\_3547330 HitID: NC\_017026\_(+)\_3541128\_3541421  
rank=1 bitscore=165.0 evalue=9.0E-39 perc\_ident=100.0 perc\_conserv=100.0 perc\_gaps=0.0  
query\_cvg=100.0 subj\_cvg=100.0 alpha=75.61 beta=15 prob=0.981392010458906  
GTGACGGCGGCCGAGGACAAAGAAGAGCGGCTTCGGCTGTCCGGAACCCGATCGAACTC  
GAGGAGCTACTTCAGCTTCCGGTCGATGTTGCGTACGAGGGCCTGTTGACGGACGACGTT  
TCCGAATCCGTTTCGAAAAAGCTCATTACGCTACGAGCCGGTCCCTCAAGAACCGCCTGC  
TCGAATCTGCGCAACCCCGCTGGCGTTGGGGCGGACGACGGTGCTCGGCGTGATGTGGTG  
CACCAAAGGGACATTGCCGACGGAAGTGGCGTTGAGCCAGCAACACACCGTTGA

>AA QryID: NC\_000962\_(-)\_934293\_934481 HitID: NC\_020245\_(-)\_935120\_935308

rank=1 bitscore=81.3 eval=2.0E-13 perc\_ident=79.03 perc\_cons=79.03 perc\_gaps=0.0  
query\_cvg=100.0 subj\_cvg=100.0 alpha=79.03 beta=2 prob=0.9813489540784104  
ATGATCGGCATCAGCTACTTCGTTATGACCCAACTCGAGGCGGCGGTTCGAGCGACGCTCA  
AGGCGATCTTCCCGTTGTGGCGACCGCCGACCTCTCGACGGCGCCAACCACCATGGCTTG  
TTGGGTTTCGTCGTTCTCGCGCCTGCTCGGCCTGACCTCCAAGCGCAGCGACAAGCTTTG  
GCGCAGTAG

>AA QryID: NC\_000962\_(+) 2232399 2232671 HitID: NC\_017026\_(+) 2227689 2227961  
rank=1 bitscore=121.0 eval=1.0E-25 perc\_ident=80.0 perc\_cons=80.0 perc\_gaps=0.0  
query\_cvg=100.0 subj\_cvg=100.0 alpha=80.0 beta=5 prob=0.9811714578418584  
ATGCTCGACGATCCGCGTTCCGCGGGTAGCGTCGTTGCGCCGTACGACGATGGCGAGCTG  
CTGCGTCTCGCCGAACCTACGCGCTAGCAGCGGGCTAAACTACCTGATTGCTGCGTGCCG  
GATGTGGCAATTCATCACCAGGCAAGCCTCGCAACCTTTGACGACACGCTCGCTGCCGCA  
GCACGCAACAAGGAGCGTGCCCGTAGCACAAACGGCGCAGCTAACCCAATACGACCAGCT  
TCACTTGACATAATGTCGCTTATCGGCTTATAA

>AA QryID: NC\_000962\_(+) 3580277 3580495 HitID: NC\_012207\_(+) 3525409 3525627  
rank=1 bitscore=87.4 eval=2.0E-15 perc\_ident=100.0 perc\_cons=100.0 perc\_gaps=0.0  
query\_cvg=100.0 subj\_cvg=100.0 alpha=73.28 beta=18 prob=0.9807474435740465  
GTGGCTACCATGGCGGCGGTCTAGGCGGCGGTCCACAGGACGAAATACCCGAAGCCGAT  
GCGGTGGAGCAAGGGCGTGCTGTGATTTCGACGACGAAGCCGGGTTGGACACCGCCTAC  
CTCAGCGGCGGCGCCGGCGACCGAGACGCCAGCGAAGCCGACGTCGTCGACCAAGCCTTC  
GTCGTTCCGTCGCCGACGACGAAGAAATCGACCGGTAG

>AA QryID: NC\_000962\_(-) 33900 34157 HitID: NC\_002755\_(-) 33844 34101  
rank=1 bitscore=123.0 eval=3.0E-26 perc\_ident=100.0 perc\_cons=100.0 perc\_gaps=0.0  
query\_cvg=100.0 subj\_cvg=100.0 alpha=82.51 beta=1 prob=0.980713968054949  
TTGGTGGACCTGAAAGCGCATCCACCACCGAAGGTGGCGGTGGGAACAGAGTCACGGGGT  
GCAAAGTCGAATCGACTCAGCGCTGCCGCCGATCGGCACTGCGACAACGCGCCAACACGG  
TCACCCAATACCGCACCTTTTCGACGTTATCGCCGGCCACCAGCACCGGCACCACAATGC  
ACCAAACGCAACATCGCACGCGCATTGGGTGCGATAGCGCCGCTAAGAGTAGGACGTGCC  
GCCGTGAATTATCAATAG

>AA QryID: NC\_000962\_(+) 132875 132997 HitID: NC\_020245\_(+) 132952 133074  
rank=1 bitscore=62.4 eval=4.0E-8 perc\_ident=100.0 perc\_cons=100.0 perc\_gaps=0.0  
query\_cvg=100.0 subj\_cvg=100.0 alpha=78.75 beta=1 prob=0.9807111780953393  
GTGTTGCATCCCGCCCAACGGCGCAGGCAACAATGGTGGCGATGAGTGGCGCCAGCTCATC  
GGAGTCGCCCACCTGCTATCGCCATCCCGGGCGCCGGACCTACGTCCGCTGCACCCGATG  
TGA

>AA QryID: NC\_000962\_(+) 1622756 1623007 HitID: NC\_002755\_(+) 1622638 1622889  
rank=1 bitscore=162.0 eval=4.0E-38 perc\_ident=100.0 perc\_cons=100.0 perc\_gaps=0.0  
query\_cvg=100.0 subj\_cvg=100.0 alpha=82.35 beta=6 prob=0.9806185709906448  
TTGAGTTCTGCGATGCAGAGGTGGCAGATCGTCAATGCGGGCGAGAATTTGTTCCGGCCT  
CTGTTGATGCGGGTGACATCGGAAGGTGTGGGTAAAGGGATCAGCCCGAGATCATGCAAT  
CACTGTCTGACAACCAGATTACGACGCGCCTGGTAATCGACAGGATTCTGGGACTATCA  
GACTCCAGCATCAGGTTCTCACCCGGGCCAGGTGCGAGGCGATGGTCGCGGGCGCTGCCG  
CGAAGCTACTGA

>AA QryID: NC\_000962\_(+) 2736988 2737116 HitID: NC\_002755\_(+) 2733838 2733966  
rank=1 bitscore=76.6 eval=2.0E-12 perc\_ident=100.0 perc\_cons=100.0 perc\_gaps=0.0  
query\_cvg=100.0 subj\_cvg=100.0 alpha=79.46 beta=1 prob=0.9806031384694648  
TTGGCCGCGGAGCAGTCCCATGACGATCCGCTAGTTACCTCGGATACCCGCTCGGCCG  
AATGCGCAGCTAGCGGCCATGTTGATCGAAATCATTTGGGGTACACCGCATCTCGGAGCA  
ATATGGTAG

>AA QryID: NC\_000962\_(-) 800104 800394 HitID: NC\_018078\_(-) 800947 801237  
rank=1 bitscore=167.0 eval=1.0E-39 perc\_ident=100.0 perc\_cons=100.0 perc\_gaps=0.0  
query\_cvg=100.0 subj\_cvg=100.0 alpha=81.48 beta=7 prob=0.980428429840238  
TTGCGCCGAATACTGCGCCGCTGTTTACCTGTCGTAGGTCCACCGGCCCGCGCTCGGGC  
GTGTCGCCCCGCACACAGCCTTGTCGCGATCAATTTCAAGGCCGAAATCGTCGCGCTTCAA  
GGGTGGGACCGGACGCGCCCGTGTGGGCGCTGGTCGTATGCCCGGCCAGACGAAACCTG  
GCGCAGGGCAACCTGAACAGTATGCCCCAGATCACCGCTTCGGCCAAATCGCCGCTGGCT  
CGGGTGCAGCGGCGGGCGGCCGTTGCTATCGGCACCTGACCCGGCACTGA

>AA QryID: NC\_000962\_(+) 2829954 2830139 HitID: NC\_009525\_(+) 2841922 2842107  
rank=1 bitscore=117.0 eval=3.0E-24 perc\_ident=100.0 perc\_cons=100.0 perc\_gaps=0.0  
query\_cvg=100.0 subj\_cvg=100.0 alpha=80.19 beta=4 prob=0.9802612145513232  
ATGCTGGCTGCGTTTAGGTCTCACGATGCCGTGTTAAGAGAGTTTCGAAAAGCTCGGCCG  
TATCATCAGTCAACCGGGCACGGCTGCCTCTGCGGCAACGAAACTGTGCAACGCTGTCC



ATCATCGATAGCAACCAGATATATGGCCACATTGACCGAATGAATCGCCGCGACGAGCTT  
GGCTAA

>AA QryID: NC\_000962\_(-)\_1526236\_1526376 HitID: NC\_017026\_(-)\_1527162\_1527302  
rank=1 bitscore=82.8 eval=5.0E-14 perc\_ident=100.0 perc\_cons=100.0 perc\_gaps=0.0  
query\_cvg=100.0 subj\_cvg=100.0 alpha=77.54 beta=5 prob=0.9801846944726926  
GTGACGGACTTTTACGCATTATCGCTGACGATCTTGCCTCCAGGACTCCAGAATCTAC  
TGCGACGGTTCGGGTCAAGACGACTTCGGTGGTGTGCTTCGCGTTGCCACCGCGGTTCGGC  
GAGGTGCCCCACCGGGCTGTGA

>AA QryID: NC\_000962\_(+)\_68418\_68579 HitID: NC\_020245\_(+)\_68410\_68571  
rank=1 bitscore=47.4 eval=0.002 perc\_ident=71.7 perc\_cons=71.7 perc\_gaps=0.0  
query\_cvg=100.0 subj\_cvg=100.0 alpha=71.7 beta=9 prob=0.9801743480809474  
GTGATCATGGAACCTTTCGTGTCTGTATCGCGGGTTGGTCATCGCACTGCTGGCGGCC  
ATCACCCCTGCTGCGGGCGAACGCCCCGAAAGCCGCGCCAGGCGCTCGCAAATGCCGCC  
GAGGCCGGGGAGCATCCGCCACATCACCGTTGCGACGGTAG

>AA QryID: NC\_000962\_(+)\_2368732\_2368860 HitID: NC\_002755\_(+)\_2369640\_2369768  
rank=1 bitscore=67.4 eval=1.0E-9 perc\_ident=100.0 perc\_cons=100.0 perc\_gaps=0.0  
query\_cvg=100.0 subj\_cvg=100.0 alpha=77.61 beta=1 prob=0.9797469193943291  
TTGATTACGTGGATCACCATGTGGGTGATCGCGGTGACAGCTTTGGTACCGAGCACATC  
GCCACAACGCGCGGTACGAATCTAGTACACAAATCCGCACCAGCCGCCATGCGACTTCGC  
AGGTCATAG

>AA QryID: NC\_000962\_(+)\_4316824\_4316928 HitID: NC\_002755\_(+)\_4309147\_4309251  
rank=1 bitscore=61.2 eval=9.0E-8 perc\_ident=100.0 perc\_cons=100.0 perc\_gaps=0.0  
query\_cvg=100.0 subj\_cvg=100.0 alpha=77.2 beta=1 prob=0.9797290314963294  
GTGGATAACAGCGCCCGTCAATGCGTTCTCATCGACAGCCTGGCAGGTACCCGAGCGAAA  
TGGATTGTCGACTAAGCATCCACATCTGCCCCGGCTGCACCTAG

>AA QryID: NC\_000962\_(+)\_927620\_927808 HitID: NC\_017528\_(+)\_928280\_928468  
rank=1 bitscore=80.5 eval=3.0E-13 perc\_ident=74.19 perc\_cons=74.19 perc\_gaps=0.0  
query\_cvg=100.0 subj\_cvg=100.0 alpha=74.19 beta=6 prob=0.9795642261051574  
TTGGACCACGTGATCGACGACCGTCACAAGTCGACACGCCGAACGTGCAACCACGGCGGC  
ATCACCTGGCGTGTGCGCCGCCACCAGCGCACGCTCGGCACGGAGTTTAGCAACTACTCAT  
CCAGAAGCCGGCCACTACGGCCTGGCCACCTGGTTTACCCGCATGGACGCGATGACCGCA  
CCGACCTGA

>AA QryID: NC\_000962\_(-)\_2582827\_2582991 HitID: NC\_002755\_(-)\_2578673\_2578837  
rank=1 bitscore=73.2 eval=3.0E-11 perc\_ident=75.93 perc\_cons=75.93 perc\_gaps=0.0  
query\_cvg=100.0 subj\_cvg=100.0 alpha=75.93 beta=1 prob=0.9795523173986971  
GTGCGGGAGATACCGGTGTGCCAGTGTGACCCCTGCACGGCTGGGCTGCAAAGCGAGAG  
CGCGGAATTGACGCACCGGGACCCATTATGTGCGCCTCGGCGGGCGGGATCGGCGCTGG  
ACGCGGCGCGACATGTACGACTGGCTCGAATCAGCCCCGAGTGTGA

>AA QryID: NC\_000962\_(-)\_1530973\_1531209 HitID: NC\_017026\_(-)\_1531901\_1532137  
rank=1 bitscore=136.0 eval=3.0E-30 perc\_ident=100.0 perc\_cons=100.0 perc\_gaps=0.0  
query\_cvg=100.0 subj\_cvg=100.0 alpha=76.64 beta=12 prob=0.9793413394848101  
ATGATGGCTCTGATGAATGAGATTGATCTGTATGAGCACAAGACACCGCTGCCGATCTCG  
CCGACGAGCGAAGGCACCCGATGACCGAAACGCAATTTCCGCCAGACGCTCTACGAGTGC  
GCGGTTAAGTTGCGCGAGTGGCCTACCTTGCCCGAGGAGTGGGCGAGCAGCTCTC  
TTGCGAATGTCCGAGCAGATGATCGTAACCCCGGTGAGTTCGCGCCGAGAGTCTGA

>AA QryID: NC\_000962\_(-)\_4093021\_4093251 HitID: NC\_002755\_(-)\_4085263\_4085493  
rank=1 bitscore=118.0 eval=1.0E-24 perc\_ident=100.0 perc\_cons=100.0 perc\_gaps=0.0  
query\_cvg=100.0 subj\_cvg=100.0 alpha=77.17 beta=8 prob=0.9792796528246073  
TTGCTTACGTTGGACATTGCGACACAGGGTGTGGTTCGACGTCGCCGGGAACCCGACCTCCT  
AGCAGGCCCGGGGCCCTTGCGGCGACTGTCTGAACGGGCAATCGTCACCACCCTGCTGATG  
CCGGCGCCACTGGATGTGACGACGAGATCGGCGGGGTGTCGACGGGCGTTGCCGATT  
CCCTACGTCGGCGGCTCGCGCATTCAGCCCAGTTCAGTTCAGAGCGCATAG

>AA QryID: NC\_000962\_(-)\_2619023\_2619193 HitID: NC\_020245\_(-)\_2565766\_2565936  
rank=1 bitscore=102.0 eval=7.0E-20 perc\_ident=100.0 perc\_cons=100.0 perc\_gaps=0.0  
query\_cvg=100.0 subj\_cvg=100.0 alpha=78.53 beta=2 prob=0.9791721226413832  
GTGTCCGACGAGAGTCGGGGCGGGTTCGGCTACGTCGACGTATGGGCCCGAACAGCTCTG  
TGCGCCGACACCAAGCTGGTGCCGAGCTGGCCGCGGTTGGTGAGTGCCACTCGCCT  
GATGATGCCGGGACTCCGCCGACCTCGACACTTCAGTGTGAGGCGCAGTAG

>AA QryID: NC\_000962\_(-)\_2152953\_2153183 HitID: NC\_012943\_(+)\_2269677\_2269907  
rank=1 bitscore=126.0 eval=4.0E-27 perc\_ident=100.0 perc\_cons=100.0 perc\_gaps=0.0  
query\_cvg=100.0 subj\_cvg=100.0 alpha=78.66 beta=5 prob=0.9790961848812957  
GTGACAGCGGTGGTTGCTCGACACGGAGGTGGCCAACGGCTTCGGACATCTCCGATAC

ATGCGGTCTGGGCGGTGTGCTGGCGGACAAGGCTGTGACTCGGTGGAAGCGTTGGCGCCG  
 TCCGCGATTTACCGCATCATTGCCGGACACTGCGTCGGTGGCGCGCCGTCCGTGCGCTCG  
 CAGGCGCATATGGGGATCGAACAAGCCCATCGGCGGCGGGAGAACGAGTGA  
 >AA QryID: NC\_000962\_(-)\_2582315\_2582440 HitID: NC\_020245\_(-)\_2529056\_2529181  
 rank=1 bitscore=68.6 eval=4.0E-10 perc\_ident=100.0 perc\_cons=100.0 perc\_gaps=0.0  
 query\_cvg=100.0 subj\_cvg=100.0 alpha=76.21 beta=2 prob=0.9789905882893022  
 GTGAGTAACGGATTTCGTACACGATTGTTGCGGTACTGACGCTGACCCTGGTTCTCGGC  
 TACTGCGGACTGCGCTTCGGCGAGGCAGCGGCCCTGCGTCGCAAGAACGTGGGGACCGGG  
 AGTTGA  
 >AA QryID: NC\_000962\_(-)\_1394008\_1394160 HitID: NC\_002755\_(-)\_1393495\_1393647  
 rank=1 bitscore=79.3 eval=4.0E-13 perc\_ident=100.0 perc\_cons=100.0 perc\_gaps=0.0  
 query\_cvg=100.0 subj\_cvg=100.0 alpha=77.0 beta=1 prob=0.9787780788507645  
 TTGCTAGCGGTGGCATTGGGTACGGGCGTCACGGCATGCACCAGGGCAACCCGTATCGT  
 CACCAATGTCCACGCCGATTATTCCGCTTCGAGCGGTGAACCGCGCCGCTACCGAAACA  
 CATGCTCGGATCGTTGAACCGGCATTAGCCTGA  
 >AA QryID: NC\_000962\_(+)\_2632280\_2632393 HitID: NC\_002755\_(+)\_2628125\_2628238  
 rank=1 bitscore=65.9 eval=3.0E-9 perc\_ident=100.0 perc\_cons=100.0 perc\_gaps=0.0  
 query\_cvg=100.0 subj\_cvg=100.0 alpha=76.09 beta=1 prob=0.9787195462252731  
 TTGTCGCTGGGTATCGGGCACTCGCCGACAGTAAAAAATTATTCGAATCCCGCATTCCTG  
 ACAAACCTTGATATGACCGATCTCACCGGCCGGCTTCGGCGCTTAAGTCACTAG  
 >AA QryID: NC\_000962\_(-)\_4008464\_4008634 HitID: NC\_002755\_(-)\_4000604\_4000774  
 rank=1 bitscore=89.7 eval=4.0E-16 perc\_ident=100.0 perc\_cons=100.0 perc\_gaps=0.0  
 query\_cvg=100.0 subj\_cvg=100.0 alpha=77.35 beta=1 prob=0.978560037629802  
 GTGAGCCACGTCCGGTATGTCGCGTGGTTGGGGCAGCTGTCCTCGCGGATGGCGAATATG  
 CAGACGCTTACGTCAAGGAGCAGCATTGTCGCCGATCAGTTCGGCGAGGGCTTCCTTGTC  
 GTCCAAGTCGACACCGGCCTGCAAGCCTCCGGTGCCGTGGGTGGCAATAG  
 >AA QryID: NC\_000962\_(-)\_924393\_924563 HitID: NC\_002755\_(-)\_924302\_924472  
 rank=1 bitscore=84.7 eval=1.0E-14 perc\_ident=100.0 perc\_cons=100.0 perc\_gaps=0.0  
 query\_cvg=100.0 subj\_cvg=100.0 alpha=77.02 beta=1 prob=0.9785451429574248  
 ATGGGTTTGGCGCCTGTGATGCTGGAAATGGCTGAACAATCAGGTCTTTCACGAGCGATC  
 GAGGAGCAGATGGACCCGCCGTTTCGACCCGGGTGGAATCCGCAGCGATCAACCCGGCCGG  
 CAATCTCGATCATCGCCGCGATGGCCTACCGGGGCGGGACGGCATCGGTGA  
 >AA QryID: NC\_000962\_(+)\_230481\_230630 HitID: NC\_002755\_(+)\_230593\_230742  
 rank=1 bitscore=79.3 eval=4.0E-13 perc\_ident=100.0 perc\_cons=100.0 perc\_gaps=0.0  
 query\_cvg=100.0 subj\_cvg=100.0 alpha=76.63 beta=1 prob=0.9785040743572198  
 ATGGGTGGCGAGTTGACCGGGCGCCGGATCCCGACGGTTGTGGTTGATCTGCCGAATCAA  
 CGGCTTCTGGCCACGAACATGTGTCCGCGACTGGCGTCTGCGATACCAACCCAATCGGTT  
 ACTATAGAACTGTTCCCGCCGACAATAA  
 >AA QryID: NC\_000962\_(+)\_3798935\_3799063 HitID: NC\_002755\_(+)\_3789810\_3789938  
 rank=1 bitscore=71.6 eval=5.0E-11 perc\_ident=100.0 perc\_cons=100.0 perc\_gaps=0.0  
 query\_cvg=100.0 subj\_cvg=100.0 alpha=75.45 beta=2 prob=0.9782905225686925  
 TTGGGCGGCGAATGCTACGCAATGGTGGTGCGCTTCCCAAGGGAGCACAAACGCGAAGCTA  
 AAGCAGTTGCACGCCGAGACCGAGCCGAAAGTTCGCCCTGCGGGGAAGGCGGCCACGGGA  
 GAATTGTGA  
 >AA QryID: NC\_000962\_(+)\_1163937\_1164185 HitID: NC\_017026\_(+)\_1164650\_1164898  
 rank=1 bitscore=153.0 eval=4.0E-35 perc\_ident=100.0 perc\_cons=100.0 perc\_gaps=0.0  
 query\_cvg=100.0 subj\_cvg=100.0 alpha=79.57 beta=4 prob=0.9782901925956446  
 GTGCCCGATTCTGGCCGGTTCGTTTTCGTTGACGACTGGTCTGTTGCCGGCCTGGAGACC  
 CAGGGGCAACACCCGCACGATTGGCTCAAACATTCTTCGAGAAAGCGGACGTGGCTCTTC  
 AAGCCGGCGCGACCGGAGCGCGATCGTTTACTCGGCGAAGACGTGGCAGAAAAGCTCGCC  
 AGCGAGTTGGCGCGGCTACGCGATGTCTCCACAACAAGAGGGGAAGCTCACCCGTCGTGC  
 AAATGCTGA  
 >AA QryID: NC\_000962\_(-)\_704475\_704672 HitID: NC\_019965\_(-)\_702792\_702989  
 rank=1 bitscore=127.0 eval=2.0E-27 perc\_ident=100.0 perc\_cons=100.0 perc\_gaps=0.0  
 query\_cvg=100.0 subj\_cvg=100.0 alpha=76.58 beta=7 prob=0.9781302659359112  
 GTGACCGACGAGAAGTTCGTGAGATGCGGGGGCGACCAGCTCGTCGAAGGGGCCGTCGTC  
 TGGAACGCGCCGCTGCGTTTCAAGCGCAAGGTGCCGGCCACTTCAATCGCGGCACCCAG  
 GTCAACGCCGTTGCCTGCGAGACTTGTGGGCATATCGACCTCTATCTCGAAAGCCGTGCC  
 CGCGGCTCGACGAAGTGA  
 >AA QryID: NC\_000962\_(+)\_11225\_11416 HitID: NC\_017528\_(+)\_11230\_11421  
 rank=1 bitscore=92.0 eval=7.0E-17 perc\_ident=74.6 perc\_cons=74.6 perc\_gaps=0.0  
 query\_cvg=100.0 subj\_cvg=100.0 alpha=74.6 beta=2 prob=0.9781004193800039

TTGATCACAATCGCGAGTGAAGAGGGCGTTGATGGCCACTCCGACGGCCTCGACACCCGA  
 CCCGTACAGGTGGCGGTAGCGGTCCAAGGTCAACCCGGCGGAGTCGTGTTTCGAGCATGTT  
 CTGAAGTGCCTTGAATTCGCCCCGGCCTGGATCGCCAACGACGCCGGGTGTGCCGAGCTC  
 ATGCAGTTTTGA

>AA QryID: NC\_000962\_(-)\_1928837\_1928998 HitID: NC\_018143\_(-)\_1928844\_1929005  
 rank=1 bitscore=99.8 eval=4.0E-19 perc\_ident=100.0 perc\_cons=100.0 perc\_gaps=0.0  
 query\_cvg=100.0 subj\_cvg=100.0 alpha=76.93 beta=2 prob=0.9780898644829619  
 GTGATCCAGCAGTTCAACGAGCGCAACGCGCCGGTTTTCTCATCAGCCTCAAGCCCGCG  
 GCTTCGGGCTGGACCTCAAACCTATTCGCCAGCGTCGTCGACGACGGCAACGCCTTCGGC  
 TCCGTACCCACCGTCGACGACATCCGCGGACTACTCGCTTGA

>AA QryID: NC\_000962\_(-)\_3457359\_3457466 HitID: NC\_002755\_(-)\_3453150\_3453257  
 rank=1 bitscore=44.3 eval=0.009 perc\_ident=100.0 perc\_cons=100.0 perc\_gaps=0.0  
 query\_cvg=100.0 subj\_cvg=100.0 alpha=73.4 beta=1 prob=0.9777101186609026  
 GTGCAAGAGGAGATCGACGAGCGCCGCGCATGAACGGGCAACTCAAACACACTCAACGG  
 CAACGGATTACCGTCTGCTGCGCCGGAGGGCCCGATCCCGCTCGATGA

>AA QryID: NC\_000962\_(+)\_1680727\_1680990 HitID: NC\_002755\_(+)\_1680883\_1681146  
 rank=1 bitscore=156.0 eval=3.0E-36 perc\_ident=100.0 perc\_cons=100.0 perc\_gaps=0.0  
 query\_cvg=100.0 subj\_cvg=100.0 alpha=78.3 beta=5 prob=0.9775803843349018  
 TTGTCGGATCGGGAGCCTTGTGACCGGTTGGCCCTTGATCTGCGTTGGGAGGCCGCGCGC  
 GGGTTGACGGTGACGCGCCGTCGTTGCATCCACGGTGTTGGTCGGGATGCGTAACCGG  
 CTGCGGGCTTCGGATCCGACGTGTTGGTGGATGCACCATTTTCAAATGCCGTCGCGGGTC  
 GAAACTTGGGTGCCGTCGAAGAATAACCCACCAAAGGCCCTACATCAGCGCCGTCCTAC  
 GTTCGTGTGTCGGACAATCCTTAG

>AA QryID: NC\_000962\_(-)\_3359320\_3359538 HitID: NC\_009525\_(-)\_3371489\_3371707  
 rank=1 bitscore=93.2 eval=4.0E-17 perc\_ident=68.06 perc\_cons=68.06 perc\_gaps=0.0  
 query\_cvg=100.0 subj\_cvg=100.0 alpha=72.22 beta=5 prob=0.9775565445349342  
 GTGTGCCACGGGGCAGGTCCGCCCGTTGTGTCACCGGCGTCGCTGCCTTCATCGGGGCT  
 TCATCTGGCGCCGTTAGCGTCGCCTTCGTAACCACGACGACGACAAGAAGGGATGAAGCG  
 ATGAGGGTGCTCGTCACCAAACCCGATGGTACTCAGGTGGAAGTGACCTGGATCAGGGC  
 TTTCGCTTCTGGGCACGGAGACCGTGGATAACGACTGA

>AA QryID: NC\_000962\_(+)\_3965423\_3965620 HitID: NC\_018143\_(+)\_3965602\_3965799  
 rank=1 bitscore=100.0 eval=2.0E-19 perc\_ident=100.0 perc\_cons=100.0 perc\_gaps=0.0  
 query\_cvg=100.0 subj\_cvg=100.0 alpha=75.18 beta=4 prob=0.9773922077132042  
 ATGGCTTTTCGGGAGGTACAGTATGAACAAGATCAGGGAAGTGCTGCGGGTCTGGCTGGGG  
 GTGGCCGGGTTGCCGGCCCCGGGTGCCGCACGATCGCCGCGCATTGCGGTATGGACCGC  
 AAGACGGTGCGGCGCTACGTGGAGGCCCGCGCAGGCACCCGGTCTGCCCCGCGACGACGA  
 TGTCAGCGCTATCGATGA

>AA QryID: NC\_000962\_(-)\_3494317\_3494442 HitID: NC\_017026\_(-)\_3488376\_3488501  
 rank=1 bitscore=63.2 eval=2.0E-8 perc\_ident=100.0 perc\_cons=100.0 perc\_gaps=0.0  
 query\_cvg=100.0 subj\_cvg=100.0 alpha=72.88 beta=4 prob=0.9773780336245029  
 ATGGGAAGTGGGTTGTCGATGAGATCTCGCGCGGAGGTACACAGCAGGTACGCCAAGGCG  
 TATGTGCAGGCTTTGAAGAAGAGCCGGGGCCGGATTTTCGACCAGGTGTTGACCTGACG  
 GGCTAG

>AA QryID: NC\_000962\_(+)\_4056464\_4056676 HitID: NC\_002755\_(+)\_4048705\_4048917  
 rank=1 bitscore=119.0 eval=4.0E-25 perc\_ident=100.0 perc\_cons=100.0 perc\_gaps=0.0  
 query\_cvg=100.0 subj\_cvg=100.0 alpha=77.49 beta=1 prob=0.9773055093646156  
 TTGGCCGATGTCAACAGTTTTTTTCATGCTAAGCAGATCGTCAGTTTTGAGTTCGTGAAG  
 ACGGCATGTTCACTTGTGTGCGACTACATCGTCTGCGCACATTTGCCCTCCTGCAACTGC  
 GCTGCGACAATGCGCCAACCGCCGTGTAGGCGGCGCGATCCCAAGGCAGTGTCTCCGACG  
 TCGATGCCTGCGCTTCGCCTTCGATCGGTATGA

>AA QryID: NC\_000962\_(+)\_1992739\_1992972 HitID: NC\_009525\_(+)\_2002424\_2002657  
 rank=1 bitscore=124.0 eval=2.0E-26 perc\_ident=100.0 perc\_cons=100.0 perc\_gaps=0.0  
 query\_cvg=100.0 subj\_cvg=100.0 alpha=76.11 beta=5 prob=0.9772895056342765  
 GTGGTCACACGCTGCGTGCTTACATTGGTAGCTTGGGCACGTCGGCAACCGTCACAGCT  
 GTCACACGGGTCCCTGTGGGGTTGGTCGGCCACCGGCGACAACGTTTCCTGCGCGCCTTG  
 ATCTGTCGCCGCTGGGCAGGCATCGCCGCGACGGCCGTATCAGGCTTGGTCGGTGTGAGC  
 CGCCAAATCGGTATTGACGAATTCGTCATCGAACTCCCGGCCAAGACCACTTAG

>AA QryID: NC\_000962\_(-)\_4376074\_4376238 HitID: NC\_020245\_(-)\_4268927\_4269091  
 rank=1 bitscore=102.0 eval=6.0E-20 perc\_ident=100.0 perc\_cons=100.0 perc\_gaps=0.0  
 query\_cvg=100.0 subj\_cvg=100.0 alpha=76.12 beta=1 prob=0.9770690867438105  
 ATGGCTACTTTCTGCCTGACCATGTGCTGTACGGGTTCAGTGACACCCGCGCGTATCCT  
 CCAGGCGTCGAGATTTACATCCGCCCCACACGTACCGCTGACATGCTGGAACACATGG

GGCGGCGTGGACCAAGTTCGACGTCGGCATCGGTGCAGACGACTGA  
>AA QryID: NC\_000962\_(-)\_1933963\_1934202 HitID: NC\_018143\_(-)\_1933970\_1934209  
rank=1 bitscore=142.0 eval=5.0E-32 perc\_ident=100.0 perc\_cons=100.0 perc\_gaps=0.0  
query\_cvg=100.0 subj\_cvg=100.0 alpha=78.28 beta=1 prob=0.976843910411771  
ATGTCCCCATGGTGTATCGATTACGTACCTCTTACTTCGTCGGGGTCGCATCGGCATT  
GCCTTGCCCCGCTGTGCATTACACGATCGACCCGGTGTGCTGACATGTATCGGGACGGT  
GTGTCGCCCCGAGCCAGGACGCCAGACGTTGCCAACAGTAACGATTATACCCCTATGGGGT  
ATTAACACGCGCGTCACACGGCCGAAACCTTTTCGACAGAGATCTCTTATGGAGATTAA  
>AA QryID: NC\_000962\_(+)\_2334728\_2334877 HitID: NC\_017026\_(+)\_2328053\_2328202  
rank=1 bitscore=80.9 eval=2.0E-13 perc\_ident=100.0 perc\_cons=100.0 perc\_gaps=0.0  
query\_cvg=100.0 subj\_cvg=100.0 alpha=73.19 beta=4 prob=0.9767926501029405  
ATGCGGGCGAACGGTGTGTTCCGGCTGTTGGCGGCCGCCGCGTGCAGGTGTTCCCATCCCC  
GTTATCGACAACCGCGCCGAGGAGATGACGGGCCGCCACGCCACAACGGCAACGAGTTTC  
AGCATCACGGACCAAGTCGTGCGCATCATGA  
>AA QryID: NC\_000962\_(+)\_177388\_177513 HitID: NC\_002755\_(+)\_177559\_177684  
rank=1 bitscore=69.7 eval=2.0E-10 perc\_ident=100.0 perc\_cons=100.0 perc\_gaps=0.0  
query\_cvg=100.0 subj\_cvg=100.0 alpha=72.32 beta=4 prob=0.9766634718610667  
GTGCCGGCCACCATTGGCCTTCCCGATGGATTGGTGCCAGCAGCAACCGGCATCATCGAA  
AACCGGCTCTTCATGATCGAGGGCCGGCAGCGGCTCGAGCAGCGGCAGGCCGGGGTGATC  
ACGTAG  
>AA QryID: NC\_000962\_(+)\_1190529\_1190651 HitID: NC\_002755\_(+)\_1190575\_1190697  
rank=1 bitscore=78.6 eval=5.0E-13 perc\_ident=100.0 perc\_cons=100.0 perc\_gaps=0.0  
query\_cvg=100.0 subj\_cvg=100.0 alpha=73.99 beta=1 prob=0.9765679741285933  
GTGAATTCTTTGAGCGGAATTGCTCGTGCGATCCGGCTACGTTTTCGAGGTGAGATCTGG  
GTGGGCGGCGATGCCCCGTGCTTCGATGATCAATTTGGGGATCTGAAATGTCAAATGTGT  
TGA  
>AA QryID: NC\_000962\_(+)\_3489169\_3489309 HitID: NC\_020245\_(+)\_3410176\_3410316  
rank=1 bitscore=81.3 eval=1.0E-13 perc\_ident=100.0 perc\_cons=100.0 perc\_gaps=0.0  
query\_cvg=100.0 subj\_cvg=100.0 alpha=72.85 beta=3 prob=0.9762244096885799  
GTGCACCACATTCTGGCGATGTTGGTGAGGTTTGTTCCTGCGCCCGTCCGTGGCGCGTTC  
GGGATCGTTGGGGTTGGCCGGTTGCCACCTCGGCGGAAGCGGACGGTGAGCGCGGCCGA  
GTCGTGACATTTGGCGGTAG  
>AA QryID: NC\_000962\_(+)\_985992\_986147 HitID: NC\_002755\_(+)\_986004\_986159  
rank=1 bitscore=85.5 eval=6.0E-15 perc\_ident=100.0 perc\_cons=100.0 perc\_gaps=0.0  
query\_cvg=100.0 subj\_cvg=100.0 alpha=73.45 beta=2 prob=0.9761695943467141  
GTGCTCGGCCAATCCGGGGCCCGGACAGGCTCACGGATATTGACTCCCGGCGCGATGGAA  
AATCATCGCGGTGCCGTCATTCAATCGCCGGACACGTGGCCACCGCCAGCGGTGTGGCC  
AGCAAGCCGAATCTCAACCGCAGGTGTGTTCAATGA  
>AA QryID: NC\_000962\_(+)\_503146\_503298 HitID: NC\_017026\_(+)\_503468\_503620  
rank=1 bitscore=78.2 eval=1.0E-12 perc\_ident=100.0 perc\_cons=100.0 perc\_gaps=0.0  
query\_cvg=100.0 subj\_cvg=100.0 alpha=71.1 beta=6 prob=0.9760045485852692  
GTGCGGGCGGCCCGCTACCGGTCCGATTGCCCCGGATGTGGCAGCTTGCGCATACAGTGC  
AGCCTTATACACGCCGACCTGTTGGCTGCCGCCGACTACAACGTTGTGGGATTGGCGGCG  
GCGGTGCTATCGGTGTGGGCCTACTTGCCGTAG  
>AA QryID: NC\_000962\_(-)\_1961887\_1962129 HitID: NC\_018078\_(+)\_2460398\_2460640  
rank=1 bitscore=139.0 eval=4.0E-31 perc\_ident=100.0 perc\_cons=100.0 perc\_gaps=0.0  
query\_cvg=100.0 subj\_cvg=100.0 alpha=72.76 beta=10 prob=0.9757723372271181  
ATGCGAGACACGACTTTCGGCCCTGTCGTACCCGCCTGTGCGGGTGGACGTATGCCCTT  
TCCGTGCTCCTGCTGTGGGTGACCTGCACCGCCTATGCTGTCTTGATCGCGGTGAGCAG  
ACACGAATCGTCATCTTCCGCAAAGAATTCGCCGACGACCTAGCTGATCCGCGCCGGGGA  
TTTGGGATGTTACCTTTGTCGCTGCGTCCGACGTGCTCGGCACGCGATTAGTTGGTCAG  
TAG  
>AA QryID: NC\_000962\_(-)\_3310445\_3310651 HitID: NC\_017528\_(-)\_3304651\_3304857  
rank=1 bitscore=95.1 eval=1.0E-17 perc\_ident=100.0 perc\_cons=100.0 perc\_gaps=0.0  
query\_cvg=100.0 subj\_cvg=100.0 alpha=71.32 beta=7 prob=0.9757173521294413  
GTGTGCGAGTTCAAAACGCTGAAGTACCGCAACGACTCTCCTGAACGGTTCGATTGATC  
GAACACGCCCCGACCTGGCCAGGCCACATGGGCGCGGCCATGGCCAACGCCTACTCGGCC  
AACCCGAATCCATTGCGCGTCTACCGCAACCCCCGAAACCGGCGACCGCGGCATGGATC  
AACCCGCCACCCAGATCCGAAATAG  
>AA QryID: NC\_000962\_(+)\_3318044\_3318286 HitID: NC\_002755\_(+)\_3312364\_3312606  
rank=1 bitscore=88.2 eval=1.0E-15 perc\_ident=66.25 perc\_cons=66.25 perc\_gaps=0.0  
query\_cvg=100.0 subj\_cvg=100.0 alpha=66.25 beta=12 prob=0.9756692576254595

TTGTCGGCCACCGCCGGCAAACCAACATTCAGCCACAACGCGACAGAGAGGTACCCAATG  
TTCAGTCCCCGATCCGCGCCCTCGCCGGCATGTCTCTGCTAGCCTCGGCGATCGGACTG  
GCGGCCTTCGGAGCCGCTACCGGCACCGCCAATGCCGCCCGACCCACCAACCCGAGTGG  
GGCACCTACACCTGCTACGACTACGCAACCCAGACGTTCTACGAGTGCTTTGACCCCAGC  
TAG

>AA QryID: NC\_000962\_(-)\_3239515\_3239706 HitID: NC\_009525\_(-)\_3251507\_3251698  
rank=1 bitscore=117.0 eval=2.0E-24 perc\_ident=100.0 perc\_cons=100.0 perc\_gaps=0.0  
query\_cvg=100.0 subj\_cvg=100.0 alpha=74.21 beta=3 prob=0.9756270262970188  
TTGCGGGGGACTGCGCCCGCTTCGCCGCGCTTGCATCATCACTGGTTCGATGGTGATG  
ACCTGGGGGACCTCCCGCTTGCAGGGGACTGCGCCCGCTTCGCCGCGCTTGCATCAT  
CACTGGTTCGATGGTGATGACCCGCTGCGCCCGCTTCGCCGCGCTTGCATCATCACTG  
GTTTCGATGGTGA

>AA QryID: NC\_000962\_(-)\_3755328\_3755615 HitID: NC\_018078\_(-)\_3752302\_3752538  
rank=1 bitscore=142.0 eval=7.0E-32 perc\_ident=98.72 perc\_cons=100.0 perc\_gaps=0.0  
query\_cvg=82.11 subj\_cvg=100.0 alpha=61.47 beta=7 prob=0.9754890768456959  
ATGAGCCGACGGCGGCGGCGTGCCTGCGGGGGTGGTCTCGATATCAGTGAAGGAA  
TACGCGGTTACCTACCGAAAGATCTACCTTATGGCGAAGACCGCATCATGGTGCGCTGG  
AACAAAATTCGCTGGCGATGCCGAGAAGACTACTGCAAGCTGGGGCCGTTACCGAGGCC  
ATCACCCAGGTACCTGCCCGCTCCGCAGCACGCTGCGGCTGCGTCGGCAGATGGCCAAG  
GCGATCGGGGATGCGGCCCGCTCGGTGGGCCGAGGTGCCCCAGGCTGA

>AA QryID: NC\_000962\_(+)\_1735608\_1735775 HitID: NC\_002755\_(+)\_1735761\_1735928  
rank=1 bitscore=101.0 eval=8.0E-20 perc\_ident=100.0 perc\_cons=100.0 perc\_gaps=0.0  
query\_cvg=100.0 subj\_cvg=100.0 alpha=72.99 beta=3 prob=0.9754708002966239  
TTGAGCCCAGGTGGCTTCCGGCTTACCGGACACGTCGTGTGGTGCCGAAGCTCTGACGAG  
AGGGGTGCGGATTTCCGGCAGTTGCCGGCATCTCTGTACTCCTGTGACGCGCTTTATCGT  
GCGGACAACCGTACGTGTCGTGGCCGTGAGGAGGTGAGGGACGCATGA

>AA QryID: NC\_000962\_(-)\_2718844\_2719047 HitID: NC\_017528\_(-)\_2718640\_2718843  
rank=1 bitscore=113.0 eval=4.0E-23 perc\_ident=98.51 perc\_cons=100.0 perc\_gaps=0.0  
query\_cvg=100.0 subj\_cvg=100.0 alpha=73.5 beta=3 prob=0.9753875249222875  
ATGCCGCTCGCCGAGGGAGTCACCGGCGAGGGTTCGCGACACCCAGTCCCGCCCCGTCGGC  
GACGACCTCGACCTACCCGGAACGAGACCAAGATGATCAGCAAAGGCTTAGGAATAAC  
CAATCGTGCTGCCTTATCAATGGCTGCTCGCTTAGGCTGGCTGGCAGTTGCCGCGAACGG  
AACTGCGGCAAGATAATCCAGTAA

>AA QryID: NC\_000962\_(+)\_3964168\_3964296 HitID: NC\_020245\_(+)\_3872981\_3873109  
rank=1 bitscore=67.8 eval=8.0E-10 perc\_ident=100.0 perc\_cons=100.0 perc\_gaps=0.0  
query\_cvg=100.0 subj\_cvg=100.0 alpha=70.13 beta=4 prob=0.975213501978182  
GTGCGCGAGTCGATCGAGGCGCACAGAGCATCGTGTTCCGCCCGCTGGCGGTCAGAACT  
GGATTGAACACCAACAGGTTGGAGCATCAAGAAATTCGTTCAAACACTACGTCGCTACC  
GCACCGTGA

>AA QryID: NC\_000962\_(-)\_2792550\_2792720 HitID: NC\_002755\_(-)\_2788038\_2788208  
rank=1 bitscore=99.8 eval=4.0E-19 perc\_ident=100.0 perc\_cons=100.0 perc\_gaps=0.0  
query\_cvg=100.0 subj\_cvg=100.0 alpha=71.94 beta=4 prob=0.9751001632685012  
TTGGCCGTTCCAACCTCGGCTGCCCAACAGAGGTTTCGTCGGTTCGTGGCCGCGGCATCGG  
TGCTGCGGTTGATCATGGCCCGCATCGGCTTTCACCAACCGCGTCATCGCGCACTAGCGTT  
GTGTTGGCACTGTGGTGCGGGTGGCGGGTTTGAAGCAGGAGGTCTGA

>AA QryID: NC\_000962\_(-)\_3500908\_3501183 HitID: NC\_002755\_(-)\_3496705\_3496980  
rank=1 bitscore=165.0 eval=9.0E-39 perc\_ident=100.0 perc\_cons=100.0 perc\_gaps=0.0  
query\_cvg=100.0 subj\_cvg=100.0 alpha=76.69 beta=1 prob=0.9749984937718551  
GTGCGGCAACTCGTGCCGCGGCCAGGTGTACAAGTGGGCGGGCAGGTTGTATGGCAGTCGA  
CTGACGGCGGATCGGAGATTGATCGACGCCGTGCCGGCCGCATCGAGATGCGCTCTACA  
GCGCGGCTATGCCCAAATATTCTGTGGGTCAAGCGATATGCAGCCGATGGACGGCCGCTG  
GTTCCGGCAGCTGTCGGCAACTGTAAGCCATTTCTGGGACTTTGCTGTGAAAAGCTGGGCG  
ATGGTTGTGGACCTGGACGAGCCACCCGTGCGATAG

>AA QryID: NC\_000962\_(-)\_1147980\_1148156 HitID: NC\_002755\_(-)\_1148024\_1148200  
rank=1 bitscore=91.3 eval=2.0E-16 perc\_ident=100.0 perc\_cons=100.0 perc\_gaps=0.0  
query\_cvg=100.0 subj\_cvg=100.0 alpha=72.47 beta=1 prob=0.974976284694834  
ATGGCCGCGGTCCATGGACGGCCAGGTGCAGGGTGAGCACGTATCGAAGCTCAATTCCA  
TGCAGTTGTCTGGTCATGGCCGAACATTCCCATGCGGGTCTGACATCGGCCAAGGTTGTC  
GCTACGAGGCGGGCAGAAGAGTGTCCCCCGCGCAGATACGCGTGTGGCAGATGTGA

>AA QryID: NC\_000962\_(+)\_1113634\_1113864 HitID: NC\_016804\_(+)\_1114402\_1114632  
rank=1 bitscore=132.0 eval=5.0E-29 perc\_ident=100.0 perc\_cons=100.0 perc\_gaps=0.0  
query\_cvg=100.0 subj\_cvg=100.0 alpha=73.3 beta=5 prob=0.9749705368526611

GTGGTTGAGACGGCGAGCACAGCCCTCGGGGCAATCCTGGCAGGTGCGCAATGCGGTGGTG  
 CCGCCACGGTGTCCACGTCGAGGCGCCGGCCTTGTGGTACCGGTAAAGTGCTGTGGCGAC  
 CGCGATCTGGCGCGAAGCCTGATGAAGATCGAATATTCGGCTGAATATTCGCTAAGACAT  
 GTGTGGCGGCGTCCGATCCTGTCACAACCTGCCCCTAGGGTTCGGTGTCATGA  
 >AA QryID: NC\_000962\_(-)\_665434\_665601 HitID: NC\_020245\_(-)\_666657\_666824  
 rank=1 bitscore=104.0 eval=2.0E-20 perc\_ident=100.0 perc\_cons=100.0 perc\_gaps=0.0  
 query\_cvg=100.0 subj\_cvg=100.0 alpha=71.47 beta=5 prob=0.9748988815526279  
 ATGGCCGCGGACCCGCAATGTACACGCTGCAAGCAAACCATCGAACCCGGATGGCTATAC  
 ATCACCGCCCATCGCCGCGGTCAAGCCGGGATCGTCGATGACGGCGCAGTACTGATTAC  
 GTGCCCCGGTGAATGCCCCGACCCCGGGGAGCACGTTCCGCGAAGCTAG  
 >AA QryID: NC\_000962\_(+)\_811055\_811186 HitID: NC\_002755\_(+)\_813244\_813375  
 rank=1 bitscore=46.6 eval=0.002 perc\_ident=67.44 perc\_cons=67.44 perc\_gaps=0.0  
 query\_cvg=100.0 subj\_cvg=100.0 alpha=67.44 beta=1 prob=0.9748927010965236  
 TTGACGCGGATCAGCTATCCGATGATTACAGCGGAGATCTCGACGATCGTGGGCGCTAC  
 CGCCAATCCGGTATCCGGGTAGATCATGATCGACATGGGTTGATCTGCCCTGGTGGGGCG  
 GACTCACATTAG  
 >AA QryID: NC\_000962\_(-)\_1056786\_1057070 HitID: NC\_016768\_(+)\_3351640\_3351924  
 rank=1 bitscore=131.0 eval=1.0E-28 perc\_ident=86.17 perc\_cons=86.17 perc\_gaps=0.0  
 query\_cvg=100.0 subj\_cvg=100.0 alpha=69.0 beta=12 prob=0.9748900646510263  
 ATGCCGCGAAGCTGGTGGCCAACAGCACCCCGTATCTGGGCGTATTCGGGCAACGGCACG  
 CCCTCGGCGGAGTTGAGCGGCAATAGGCGACAGGCTTTGCAAAGCAAGTACCAAGCGGCG  
 CAACGGCGGTTCAACTTCCCGGATGGCGAAACCCACACCTGGGCGTACTGGCGTGCGCCA  
 TTGCAGGCCATGCTGCCTGATCTGCAGCGGGTGCTGGGCGACGGTCAGCGGCCTCGGCGG  
 GGGCCGAGGCCGCGAGAGCGCAGGCCCGCATCGCCGAGCCTGTAG  
 >AA QryID: NC\_000962\_(-)\_3135603\_3135719 HitID: NC\_002755\_(-)\_3129817\_3129933  
 rank=1 bitscore=52.8 eval=3.0E-5 perc\_ident=100.0 perc\_cons=100.0 perc\_gaps=0.0  
 query\_cvg=100.0 subj\_cvg=100.0 alpha=69.85 beta=1 prob=0.9748283131294188  
 TTGATTTACAGGGGTGACGTTCTTGCGGACTCTCCGGCGCGTCGGCCGGTCGTCCGCGAAG  
 CGCGTTTTGTCTCTCGCCGTTGCACCGCATCGCCGCCAGCCCGTACAGGGCACTTGA  
 >AA QryID: NC\_000962\_(-)\_2614068\_2614352 HitID: NC\_002755\_(-)\_2609913\_2610197  
 rank=1 bitscore=177.0 eval=1.0E-42 perc\_ident=100.0 perc\_cons=100.0 perc\_gaps=0.0  
 query\_cvg=100.0 subj\_cvg=100.0 alpha=75.36 beta=1 prob=0.9747813112897978  
 ATGTGCGTGAGCCGCGGCGGAATGCTCGAGCGTGCAAAGTTTCCGCGGCGCTTGTGTTGT  
 CGTAATGAATACATCTTGTGTTTCCAAGGTCAGCAGCCTCCATGCAACCCGGTGCGATTCC  
 GCTATCGATGCGAAACCGGTTTGCGACGGTTGATCAGAGCCCATCTCGACACTATTAC  
 CGTGTGACACCGTGTGTAATCGTCGAGTGGCCTACCCGCGAGCGCGGGGTATCAAGTAC  
 ATTGAAATGGCCCAAGCTGATGAGCGGCCCGTCGTGGGAGGATGA  
 >AA QryID: NC\_000962\_(+)\_183363\_183569 HitID: NC\_019965\_(+)\_183197\_183403  
 rank=1 bitscore=105.0 eval=6.0E-21 perc\_ident=97.06 perc\_cons=98.53 perc\_gaps=0.0  
 query\_cvg=100.0 subj\_cvg=100.0 alpha=71.36 beta=3 prob=0.9744152750092361  
 TTGTGGAGCTTCCACGACAACCGCATTGCGATGCGGTTCCAGTACGAATCCCGTGACCGC  
 AACGGCCAGTGGTATCGCAGCTACGGCACCGAACTGTGGCGAAGCCAGCATCAACGACGT  
 GCCGATCGCCGAATCCGAGCGTCGCTACCTCGGTGCGCGCTCGGCATCCGAGTATGGCCA  
 GGAAATACCGCTCTGGTAGCCCCGTAG  
 >AA QryID: NC\_000962\_(-)\_2125042\_2125233 HitID: NC\_019951\_(-)\_2209724\_2209915  
 rank=1 bitscore=104.0 eval=1.0E-20 perc\_ident=100.0 perc\_cons=100.0 perc\_gaps=0.0  
 query\_cvg=100.0 subj\_cvg=100.0 alpha=71.87 beta=2 prob=0.9743799634516117  
 GTGCCGCGTCTCAATCTAGTGACGCGAGTACGGGTCGGCGCAGGGTTTGTGCGGCGTGC  
 GCGCGTCTCGCCGGCGCAAAGTCCAAGCCGCGGGTCAATTGTTAGGTTAGACTCCACTAAT  
 CAGCTTAGGCTAGACTCCACTAATATGCGGCTTGATCGTTCGCCGACGCAGCATCTGCTG  
 GGGGTTTGCTGA  
 >AA QryID: NC\_000962\_(-)\_2959847\_2960104 HitID: NC\_019950\_(-)\_2997680\_2997937  
 rank=1 bitscore=132.0 eval=5.0E-29 perc\_ident=89.41 perc\_cons=89.41 perc\_gaps=0.0  
 query\_cvg=100.0 subj\_cvg=100.0 alpha=68.4 beta=11 prob=0.9740984081082045  
 TTGTTGCCGTTAGGCGCGAACATCACGCTCGCCGAAGTCCCGAAGTCCGCGGCGTGGTGC  
 CTGTTTCCGCACGAGGAGCTGCAGATCCCGGTATCCTGCGGGGGCCTCGGCGCTGGTGC  
 GGCGGCCGCGATGGACATGCGGGCCGTGCGACTCGTGCCGGTACGCCGAGCGTCGCGCTAC  
 TGCACAGGCTTCTTTGTGCTGATTACAGCTACCTCACATTAATGGGCCGCGGCGCGAGG  
 TTACGGTTGTCTCGTTGA  
 >AA QryID: NC\_000962\_(+)\_2680458\_2680667 HitID: NC\_017528\_(+)\_2680221\_2680430  
 rank=1 bitscore=133.0 eval=2.0E-29 perc\_ident=100.0 perc\_cons=100.0 perc\_gaps=0.0  
 query\_cvg=100.0 subj\_cvg=100.0 alpha=67.39 beta=15 prob=0.9740548137510097

ATGTTTCGTAATCCGGCTCGCCGACGGCGAAGAAGTCCACGGCGAGTGCGACGAGCTGACG  
 ATTAACCCAGCAACCGGCGTCTCACGGTCTGCCGGGTCGACGGGTTTCGAGGAAACCACC  
 ACGCACTACTCGCCGTCGGCGTGGCGGTCTGGTGACACACCGCAAGCGGGGGGTCGGCGTT  
 AGACCATCCCTGGTCTCAACTGCTCAATAA  
 >AA QryID: NC\_000962\_(+)\_1473464\_1473613 HitID: NC\_020245\_(+)\_1470311\_1470460  
 rank=1 bitscore=47.8 eval=0.001 perc\_ident=65.31 perc\_cons=65.31 perc\_gaps=0.0  
 query\_cvg=100.0 subj\_cvg=100.0 alpha=65.31 beta=2 prob=0.973803015510048  
 ATGACAACAAAGTTGGCCACCAACACACTGTTGGGTCTGAGGCAACACTCGGACTTGT  
 CCAGGTGTTGTCCACCCGCTTGGTGGTGGGGTGTGGTGTGTTGAGAACTGGATAGTGGT  
 GCGAGCATCAATGGATACGCTGCCGGCTAG  
 >AA QryID: NC\_000962\_(+)\_2684487\_2684588 HitID: NC\_002755\_(+)\_2681818\_2681919  
 rank=1 bitscore=50.8 eval=1.0E-4 perc\_ident=100.0 perc\_cons=100.0 perc\_gaps=0.0  
 query\_cvg=100.0 subj\_cvg=100.0 alpha=67.51 beta=1 prob=0.9735736306312341  
 GTGACCGCCGCCAAGAACC CGCGCCCGATCTGCGAATCGCGCTGGTGGCTCGGCGGCAC  
 ATCGACCTCAAGCGGGTCTGCAGCTGTGGCTGTGCGCCTTGA  
 >AA QryID: NC\_000962\_(+)\_2608348\_2608518 HitID: NC\_020245\_(+)\_2555090\_2555260  
 rank=1 bitscore=109.0 eval=4.0E-22 perc\_ident=100.0 perc\_cons=100.0 perc\_gaps=0.0  
 query\_cvg=100.0 subj\_cvg=100.0 alpha=70.31 beta=2 prob=0.9733821639443956  
 GTGGCGATCTGTGACCAGACACTAGGCTGCGCCAGCGACGGCGTCAGCCGCTTCGGTCGA  
 TTCGAGCCGAATGGTTCGACGGCTGCGGAACCGACCGCAAACTGGGGCAAAAGGTTACC  
 GCGGGTGTAAAGCCAGCTAGGTGAACCGATCCCGCTGGCCCATGGCCTATAG  
 >AA QryID: NC\_000962\_(+)\_3965625\_3965822 HitID: NC\_020245\_(+)\_3874438\_3874635  
 rank=1 bitscore=113.0 eval=3.0E-23 perc\_ident=100.0 perc\_cons=100.0 perc\_gaps=0.0  
 query\_cvg=100.0 subj\_cvg=100.0 alpha=70.36 beta=2 prob=0.9732888786038798  
 TTGATCGGGGCGGTGCGCCGACGCGGTGCGTCCGGCCCGCGCGATGGTCATGGTGCGGCG  
 TGGGAGCAACTGCTGGGGGTAGCGAACTGTTCACTACCCCTGGCAATCAGGTGGTCCCG  
 TCTCCCTGGCAAGCGACAGCTCGGGCAATCCACCTGGTAATCAAACAATTCGGGCGGCT  
 GGCGAGTTGTGCGCGCTGA  
 >AA QryID: NC\_000962\_(+)\_986674\_986823 HitID: NC\_018143\_(+)\_986677\_986826  
 rank=1 bitscore=94.7 eval=1.0E-17 perc\_ident=100.0 perc\_cons=100.0 perc\_gaps=0.0  
 query\_cvg=100.0 subj\_cvg=100.0 alpha=67.12 beta=7 prob=0.97327703110508  
 GTGCGGCTCGCCGGCAACGTTGGCAACATCCCGATTCCCATGATTGCACGTTGCGCGGC  
 CTAACCCAATATTCGCGGACGAACAACGCCGAGGTCTGTCAGAGCGTCGAGACACACCAC  
 CGTCCCGCTAACTTTGATGCCCTCACCTGA  
 >AA QryID: NC\_000962\_(-)\_1261722\_1261841 HitID: NC\_002755\_(-)\_1261269\_1261388  
 rank=1 bitscore=51.6 eval=7.0E-5 perc\_ident=100.0 perc\_cons=100.0 perc\_gaps=0.0  
 query\_cvg=100.0 subj\_cvg=100.0 alpha=66.67 beta=1 prob=0.9731504761947376  
 ATGGTCCGGGCTATCCCGAATCTCACCCACATGACGATCGCGCGGGCCCGATGAGGAC  
 ATCCGGCGCCGAGCGATTTTGCCGCCGGCCGGCCATGCCGGCCGATGTCACCGGAGTAG  
 >AA QryID: NC\_000962\_(-)\_1178604\_1178816 HitID: NC\_018078\_(+)\_3232905\_3233117  
 rank=1 bitscore=129.0 eval=4.0E-28 perc\_ident=100.0 perc\_cons=100.0 perc\_gaps=0.0  
 query\_cvg=100.0 subj\_cvg=100.0 alpha=68.83 beta=7 prob=0.9731069395363392  
 GTGCGGCCTTGCGGATCAGCCAGGGCCAAACGCCAGCCAGCTGCGGTATGCGCGAGTGC  
 CTAGCCATGGTCGGCAAGTCTTACC GCCGCGCATCGACTACCGGATGTTTCAAACG  
 ATCGTGTGTCGCGATCTGACCGTCGACGTTGAGGTGTTGGCGCCGTGGCCGCCGAGC  
 TCGCTCTCAGGGCGGCTCGCTGGCCGTCGATGA  
 >AA QryID: NC\_000962\_(-)\_2732784\_2732912 HitID: NC\_020245\_(-)\_2667600\_2667728  
 rank=1 bitscore=78.2 eval=6.0E-13 perc\_ident=100.0 perc\_cons=100.0 perc\_gaps=0.0  
 query\_cvg=100.0 subj\_cvg=100.0 alpha=66.96 beta=4 prob=0.9731013428583652  
 GTGCGCGACGAGGACGATGACGAGGACCCGTACGCGCGCATTCCTCGATTGGTCGCTGG  
 TGGCTTTTCGCAACGCGATGATCGTGGGCTGGGCACGTTAGTCTGCTGCGTAATCGGC  
 GCGTCGTAG  
 >AA QryID: NC\_000962\_(+)\_99379\_99573 HitID: NC\_019965\_(+)\_98931\_99125  
 rank=1 bitscore=75.5 eval=8.0E-12 perc\_ident=100.0 perc\_cons=100.0 perc\_gaps=0.0  
 query\_cvg=100.0 subj\_cvg=100.0 alpha=63.99 beta=9 prob=0.9727966489849533  
 ATGTCGCCGACCGACGAAGGACCGACGCTGTGTCAAACTGCCAACCTGGGTCAGCCAG  
 AGCTCTACCGACCGCGCGTGGTCGCGCCAATCACAGCGCGTGCCCGCGACGCACTGCAG  
 GCCGTGCTGCGCGCCAGGCGCCGCGGCCAGCGCTCTGACTTGCGCCTTATGCGCAGAGGC  
 GTGGAGCGTTGTTGA  
 >AA QryID: NC\_000962\_(+)\_2228676\_2228906 HitID: NC\_017026\_(+)\_2223965\_2224195  
 rank=1 bitscore=136.0 eval=4.0E-30 perc\_ident=100.0 perc\_cons=100.0 perc\_gaps=0.0  
 query\_cvg=100.0 subj\_cvg=100.0 alpha=54.03 beta=20 prob=0.9727897807661962

ATGACCGACTCTGTGGTCGTCCGCGTCAAGCCCGGCAGTCACAAAGGACCCCTGGTCGAG  
GTCGGTCCCAACGGTGAGCTGATTATCTACGTCCGCGAGCCGGCGATTGATGGCAAGGCC  
AACGATGCGGTCACCCGGCTGCTCGCAGCTCACCTTCAATTGCCAAAGAGCCGAGTCAAA  
TTGGTGTCCGGAGCGACGTGCGGGTTCAAGCGTTTCCGTCTGAGTCGTAA  
>AA QryID: NC\_000962\_(-)\_3239570\_3239794 HitID: NC\_009525\_(-)\_3251507\_3251698  
rank=1 bitscore=105.0 eval=1.0E-20 perc\_ident=85.92 perc\_cons=87.32  
perc\_gaps=11.27 query\_cvg=95.95 subj\_cvg=100.0 alpha=70.69 beta=3  
prob=0.9727599766187491  
TTGCCGCGCTTGCGGGGGACTGCGCCCGGCTTCGCCGCGCTTGCGATCATCACTGGTTTCG  
ATGGTGATGACCTGGGGGACCTCCCGCTTGCGGGGGACTGCGCCCGGCTTCGCCGCGCT  
TGGCATCATCACTGGTTTCGATGGTGATGACCTGGGGGACCTCCCGCTTGCGGGGGACTG  
CGCCCGCTTCGCCGCGCTTGCGATCATCACTGGTTTCGATGGTGA  
>AA QryID: NC\_000962\_(-)\_1616365\_1616601 HitID: NC\_017528\_(-)\_1617491\_1617727  
rank=1 bitscore=67.8 eval=2.0E-9 perc\_ident=62.82 perc\_cons=62.82 perc\_gaps=0.0  
query\_cvg=100.0 subj\_cvg=100.0 alpha=62.82 beta=4 prob=0.972732306734732  
GTGGGGCGAATGGCGCCGGATCGACATGCGCTAGGGCTTGGTCTGCTGGTCGGGGCTCTC  
GAACGCGGGATGGCCGCCGGGGTGATTCAGCGCGTACCGTTGCCACCACTTTCGCATCTG  
CTGCTGGCCGCGCTAACCGAATCCGCGCTGCAGATCGCGGACGCGACGGACAAAGACCGG  
ACCAGAGTCGAGGTCAACGCGCATTTATGGCCCTACTCGAAGGTCTACGGGTGTAG  
>AA QryID: NC\_000962\_(-)\_3487793\_3488026 HitID: NC\_002755\_(-)\_3483590\_3483823  
rank=1 bitscore=131.0 eval=1.0E-28 perc\_ident=100.0 perc\_cons=100.0 perc\_gaps=0.0  
query\_cvg=100.0 subj\_cvg=100.0 alpha=68.42 beta=3 prob=0.9722634911481204  
GTGCCCTTCATCACTCGAAAGAGATGCTCGACCCCGGCTCCGCCGCGCCGAGGCGGGCAC  
ACCAAGATCCTGCACCGCCTGATGAGCCGCCAACCGATCATGGGCCCAACCCCAATTAGG  
GGCCGTCGGTTGCGGGTAGTGCGTGAGGAGTTTGCGTGGTTGCGGTCCCGGCTGCCGACG  
TTGTGGACGAACCTCGATTTTGTGGCCACCGTTGGCGGTTTCGGCTTGAGTTGA  
>AA QryID: NC\_000962\_(-)\_3378495\_3378671 HitID: NC\_002755\_(-)\_3374231\_3374407  
rank=1 bitscore=73.9 eval=2.0E-11 perc\_ident=77.59 perc\_cons=77.59 perc\_gaps=0.0  
query\_cvg=100.0 subj\_cvg=100.0 alpha=60.5 beta=8 prob=0.9720503764602819  
GTGGGTTTGATGGGCCCCCATCCGAATGCCGTTGCGCTGTTGGTGGATCCGGTAGCCGAT  
GTGGTCGGCGAGGAGCTTGGTGTGTGGCTGGCGGCCTCGCTGCCGGCGGTGGTGGCTGGC  
CAATTGCGCAGGCGCGGGTGTGAGGAATCTGCGGCGTCGTCGTCTACGCCTGGGTAA  
>AA QryID: NC\_000962\_(-)\_1338605\_1338832 HitID: NC\_002755\_(-)\_1338092\_1338319  
rank=1 bitscore=117.0 eval=1.0E-24 perc\_ident=93.33 perc\_cons=93.33 perc\_gaps=0.0  
query\_cvg=100.0 subj\_cvg=100.0 alpha=65.96 beta=4 prob=0.9720463080085637  
ATGAGCCAAAGTGCAATCTGCACCTACCGCCGCCGCCGAAGGGTAAATCTTCCCAATCAG  
CGCCCACTTGATGTGCAAAATGCACCCGCCGCACAGTTCACCATGTGGTTGACGCGACA  
ACGACGACTAGCTGGGTACTATGCCCGGTGCGGTGGCGGATTTGCGAAATTGCGGTGTGT  
CGCAAGTTGTTCAACACGGTCGACTCATCCAGCAGACCCACACCGTGA  
>AA QryID: NC\_000962\_(+)\_3421221\_3421430 HitID: NC\_020245\_(+)\_3344959\_3345144  
rank=1 bitscore=71.2 eval=1.0E-10 perc\_ident=77.05 perc\_cons=77.05 perc\_gaps=0.0  
query\_cvg=88.41 subj\_cvg=100.0 alpha=72.58 beta=1 prob=0.9718709484145992  
ATGACGGTGTGAAACCGCGGAATATGGGTGTGCTCCAGCGACGAAAGGCTCAATCGATG  
AGCGGACTAAAAGCAAGGGTTTGGGGCTTTTCAGACACTGGTCGCGGCGCTGGCTGCG  
GTAGTTGCAGTACTAGCAGCGGGCTGCGCTACCCAGCGCGTTCCACGGTTCTGCCGGAA  
TCGGAGTTAATTCCTCAAAGCCTCGGTTAG  
>AA QryID: NC\_000962\_(+)\_139956\_140144 HitID: NC\_017026\_(+)\_140040\_140228  
rank=1 bitscore=72.0 eval=9.0E-11 perc\_ident=80.65 perc\_cons=80.65 perc\_gaps=0.0  
query\_cvg=100.0 subj\_cvg=100.0 alpha=54.31 beta=21 prob=0.9718174923937907  
ATGACCACGATGATCATGACTTTTGTGTTCCACAACGTGTTACCCGTGCGACGAAAGGG  
CGGGCACGGTCGCTGCTGCGGGTGAGTCGGCGTCTGACGGACACGTTTCGCGCACCGCTC  
GCCTGGACCCCGCAGGAGCGGGCCGACCGGTATGTGGCACGTATGCCGATCGCGGTGATT  
GCGGACTGA  
>AA QryID: NC\_000962\_(+)\_2206950\_2207207 HitID: NC\_009525\_(+)\_2216849\_2217106  
rank=1 bitscore=157.0 eval=2.0E-36 perc\_ident=100.0 perc\_cons=100.0 perc\_gaps=0.0  
query\_cvg=100.0 subj\_cvg=100.0 alpha=66.76 beta=3 prob=0.9717650900123531  
GTGCTGCTGCCAAGACCCAGGAAGTCTCGGACGAGAGACTCGCTAGCCTCCGTGGTATC  
GGGCATCCCTATACCCCTGCTCGATCCTCAATATCGGACTAACAAAATACATCATCGCG  
CCTGTATACGCGATTACATTGCAATTTATCCTTATCACCTTCTTAGAGTGCAATATCAGT  
AATAGACATATCGCGCTCCTCGCGCCCCAGGAGGCGGTTCGACGAATTCGCCGTGCGCAAC  
GACATGAGCCGTGCTGA  
>AA QryID: NC\_000962\_(-)\_2108948\_2109064 HitID: NC\_020245\_(-)\_2080062\_2080178



rank=1 bitscore=65.5 evalue=4.0E-9 perc\_ident=100.0 perc\_conserv=100.0 perc\_gaps=0.0  
query\_cvg=100.0 subj\_cvg=100.0 alpha=62.88 beta=2 prob=0.9717245579810239  
TTGTGGCGTGATCAAACGTGTGTGGCGCCCCACGGTGTTCCTGCGGGCGCTTTCTGCTG  
TTCAGCGGTGCTTTCAGGTGGAGTTCAACGGTGTGCGCGTTTCGCACGGTGCACCTGA  
>AA QryID: NC\_000962\_(-)\_3568835\_3568957 HitID: NC\_017528\_(-)\_3563244\_3563366  
rank=1 bitscore=30.4 evalue=142.0 perc\_ident=65.0 perc\_conserv=65.0 perc\_gaps=0.0  
query\_cvg=100.0 subj\_cvg=100.0 alpha=65.0 beta=2 prob=0.9717075299857056  
GTGATTGACAACAACGCATTTGGTGTGCGCGCGGCTGCCGCGGTGCCAACCGCGGGAACC  
CCCCATAGCAAGAACCGTGTGCGCCGCGCGACTGACGAGTCCGTGGAGCGGGGCTCTACG  
TAA  
>AA QryID: NC\_000962\_(-)\_3546877\_3547056 HitID: NC\_020245\_(-)\_3471364\_3471543  
rank=1 bitscore=77.4 evalue=2.0E-12 perc\_ident=100.0 perc\_conserv=100.0 perc\_gaps=0.0  
query\_cvg=100.0 subj\_cvg=100.0 alpha=59.38 beta=2 prob=0.9710161044566703  
TTGTCTCGGCCCGCCGTACCAAGGCCGCCGGGTACGCGGAAGCGGACGTTCAACGTCGCC  
TGGCCAAAGGTCTTCCGCCGCCAGTCATCGCGCGACGGTGACGACACCCGTGGGAGTT  
GCCGGGTCCAGCGACTTGATTCGGCCGCTGTATTGATGTCTGCTCCCTCGGTGGCCTAG  
>AA QryID: NC\_000962\_(-)\_1174927\_1175199 HitID: NC\_020245\_(-)\_1175746\_1176018  
rank=1 bitscore=116.0 evalue=4.0E-24 perc\_ident=80.0 perc\_conserv=80.0 perc\_gaps=0.0  
query\_cvg=100.0 subj\_cvg=100.0 alpha=59.94 beta=2 prob=0.9709860317939165  
TTGCGTGGCACCACTTCGACCGGGCCACATTTAGATCGGACGCGACGAGATCACGATCC  
CGGGATCGGATCAGACAATCGGAATCTAACTACCCGAGCGCTCGATCGCCGATACATTC  
CGGCTCCGCTACGAAGTCGGTTACGAAGTGGCGCGTGACGCGCTGCGAGAGTGGCTGCGC  
CGAGGCGGCAAACCCGCCCGCTGATCGAGATCGCCACCCGCTACCGCGGGAGAAGTCC  
CCGGTCTTACAAACATTGGCGATGCTGGCGTGA  
>AA QryID: NC\_000962\_(-)\_930553\_930684 HitID: NC\_020245\_(-)\_931380\_931511  
rank=1 bitscore=71.6 evalue=7.0E-11 perc\_ident=100.0 perc\_conserv=100.0 perc\_gaps=0.0  
query\_cvg=100.0 subj\_cvg=100.0 alpha=58.91 beta=1 prob=0.9709604875095961  
TTGCGCGAGGCGCACGAACCTTGTCGAATCTGTCAACGTGCGGGGCCAACGCCCCGCCAA  
ACGACCGCCGAGCCGTGCCGATCTCCGGCGGCCATCGGATGTTGACGAGTGTCAACTTC  
GTCTCCCGGTAG  
>AA QryID: NC\_000962\_(+)\_2786232\_2786519 HitID: NC\_018078\_(-)\_1628636\_1628893  
rank=1 bitscore=121.0 evalue=1.0E-25 perc\_ident=85.88 perc\_conserv=85.88 perc\_gaps=0.0  
query\_cvg=89.47 subj\_cvg=100.0 alpha=57.55 beta=8 prob=0.9708800125060484  
ATGGGGCAGGGTGACGGCGATAACATCCCAATGACCGTGATTCTTCGAACCATGGCGACG  
TACGGGCCACGACAACCTGCCATCGAAGGGGCGACGACAATGAAGACAAGGAACCCACGG  
ACGCTGCTAACCTGGCTGCTCGGCGCGATAGTTACTGGGTTGTACGTGGTTTTCTGCTACG  
GGCTGCCAATTGCAAGCGCCCGCGCCTCCCACTCCGGAATAGGTTGGTGGGCCCGCAG  
GCTCCACTGCCGCGCCGGATGCGGCGCCAACGCACCTCGGCGTCTAG  
>AA QryID: NC\_000962\_(+)\_1946860\_1946982 HitID: NC\_002755\_(+)\_1937662\_1937784  
rank=1 bitscore=50.8 evalue=1.0E-4 perc\_ident=100.0 perc\_conserv=100.0 perc\_gaps=0.0  
query\_cvg=100.0 subj\_cvg=100.0 alpha=54.31 beta=4 prob=0.9707893394790843  
GTGCTGGACACCGCCTACCGAGACCACCTCGAGCGGTTCTGTTGCAAAACACCCGAGCCA  
CCGCGCTACCGGCCTTCAGCGCGATCAACCCACCACCAAAGGAGGACCAGCCGACTCAA  
TGA  
>AA QryID: NC\_000962\_(-)\_4320165\_4320257 HitID: NC\_017026\_(-)\_4288684\_4288776  
rank=1 bitscore=48.5 evalue=6.0E-4 perc\_ident=100.0 perc\_conserv=100.0 perc\_gaps=0.0  
query\_cvg=100.0 subj\_cvg=100.0 alpha=49.12 beta=4 prob=0.9705726791354996  
GTGACCACGGTCAACCCGCCGACCGAAGCGATCAGCGGCCGCGTCGAGCACCTCCGGGGA  
TCGACCCTCGGCTTTCGCAATCTCACCAACTAA  
>AA QryID: NC\_000962\_(+)\_183388\_183561 HitID: NC\_020245\_(+)\_183645\_183791  
rank=1 bitscore=76.6 evalue=3.0E-12 perc\_ident=97.92 perc\_conserv=100.0 perc\_gaps=0.0  
query\_cvg=84.21 subj\_cvg=100.0 alpha=53.79 beta=4 prob=0.970464585310799  
TTGCGATGCGGTTCCAGTACGAATCCCGTGACCGCAACGGCCAGTGGTATCGCAGCTACG  
GCACCGAACTGTGGCGAAGCCAGCATCAACGACGTGCCGATCGCCGAATCCGAGCGTCGC  
TACCTCGGTGCGCGCTCGGCATCCGAGTATGGCCAGGAAATACCGCTCTGGTAG  
>AA QryID: NC\_000962\_(-)\_565482\_565619 HitID: NC\_002755\_(-)\_566930\_567067  
rank=1 bitscore=38.1 evalue=1.1 perc\_ident=57.78 perc\_conserv=57.78 perc\_gaps=0.0  
query\_cvg=100.0 subj\_cvg=100.0 alpha=57.78 beta=1 prob=0.9646192712978644  
ATGTCAGGCCAGCTGATCCGGTCACTACATGTCTCTTTGCTGCACGTCATCGACGGAG  
TCGCTGTTGGCCAGCGCGGCCGATCGGCTGGATCAGCCTGCGGTGACCTCACCCAGATG  
ACTGTCTTCAGGTTTGA

• *Mycoplasma hyopneumoniae* 7448 uid58039s

**No vsORFs**

**sORFs**

>AA QryID: NC\_007332\_(-)\_538789\_539031 HitID: NC\_017509\_(+)\_256001\_256243  
rank=1 bitscore=103.0 eval=3.0E-20 perc\_ident=98.75 perc\_cons=98.75 perc\_gaps=0.0  
query\_cvg=100.0 subj\_cvg=100.0 alpha=98.75 beta=1 prob=0.9999032783641713  
ATGATAACACTTAATCAAGAAAAATTTGATATTTTATTTAAAAAAAATTAATTGAAAAAT  
TTAATTGAAAAATCATAAAGAAAAATTAATTGAATTTGGCAAAGTCAAATATTGATTTT  
GTTACTGATTTAGAACTTTATCAATTGCCAATTTAAATGATCTTTATTCAGAACTAGAA  
CTTGTTAAAGAGTATCTTAAATCGAATTAATCTAGCATTTTATTTCAACTGAAAAAT  
TAA

>AA QryID: NC\_007332\_(+)\_724272\_724532 HitID: NC\_006360\_(+)\_708007\_708267  
rank=1 bitscore=135.0 eval=6.0E-30 perc\_ident=96.51 perc\_cons=97.67 perc\_gaps=0.0  
query\_cvg=100.0 subj\_cvg=100.0 alpha=96.51 beta=1 prob=0.9999014273086297  
ATGATAAATTTAATAGAAAATATAGTTGTAAAAGCAGAGCAAATAACAAAATCCCAAAA  
AAACAGATAGATTATTTTATTAATACTACTACCACATTAGAGAGTTTTCTAAAAGATAAG  
GAAATAAAAAAATATATTACAATGACTACTCTACTAGTTTTATGCATTCAAGTAGTCCA  
GAAAATTTTTTGTAAAAAACCAATGCCCGTTATGGTTGATTTGCTAATTTCAATGTT  
GGACACAATATTATCATATAA

>AA QryID: NC\_007332\_(+)\_429766\_429966 HitID: NC\_017509\_(+)\_444412\_444612  
rank=1 bitscore=88.2 eval=1.0E-15 perc\_ident=98.48 perc\_cons=98.48 perc\_gaps=0.0  
query\_cvg=100.0 subj\_cvg=100.0 alpha=84.23 beta=1 prob=0.9998978515414526  
TTGGATAGGAATTCTCAATTTTTTGCATTTTTACTCTTCAATTTCAAGTAATAATTTGT  
TCTCAAACTGCGATTTTCATCTCTTGGTATTTTTAGATGAATATTATTACTATTATAAT  
TCCCAGTTTTTGGCCGAAAACCCGTTTGGCTTATTCAGTCTATGCACACCATTTTTGCTTC  
GGTACTTTTTTCATAGCCTAA

>AA QryID: NC\_007332\_(-)\_421384\_421575 HitID: NC\_017509\_(-)\_436033\_436224  
rank=1 bitscore=87.0 eval=3.0E-15 perc\_ident=98.41 perc\_cons=98.41 perc\_gaps=0.0  
query\_cvg=100.0 subj\_cvg=100.0 alpha=73.95 beta=1 prob=0.9998968400719386  
ATGACAGGTGATAAATCTCAACTTGAAAAATAAATTCAATTTTAAAAATAGTCCCTAAT  
TTACCAAACCAATTCAATTTAATCGGCTTTATTATATACTAATATCTATTTAAATATA  
GATCCAAAAAAGAATTTGCCGAACTTATTAGTTTAATTTCAAAATATTATAATAAAGAA  
AAGAAAATTTAG

>AA QryID: NC\_007332\_(+)\_742631\_742747 HitID: NC\_017509\_(+)\_743485\_743601  
rank=1 bitscore=46.2 eval=0.003 perc\_ident=97.37 perc\_cons=100.0 perc\_gaps=0.0  
query\_cvg=100.0 subj\_cvg=100.0 alpha=97.37 beta=1 prob=0.9998899200251483  
TTGGATTTTACAGAAGAATTTAGCCAAATTTATAAAAAAGAAAAATGCAAAATAGACACA  
AAGAGTCAATTTTGGATGTATATAAAACAATTTAATAAGAAATTGAAATATAATTAA

>AA QryID: NC\_007332\_(-)\_528983\_529249 HitID: NC\_017509\_(+)\_265786\_266052  
rank=1 bitscore=84.7 eval=2.0E-14 perc\_ident=85.23 perc\_cons=85.23 perc\_gaps=0.0  
query\_cvg=100.0 subj\_cvg=100.0 alpha=85.23 beta=1 prob=0.9998819923012476  
TTGTTTTTAATTAGTACTAAATATTTTTTTAGTATTTTTTCTTATTTCTTTTTTTATTA  
ATTTATAAAAAAGTAAAGACTTCATTTAGCGTTATTCTAAAAAATCTTGTAATCTCCT  
CAAAAATTTAACAAAATATCAATTCCTATTATTGAAAGGAAAAATTTAAATGCAAAATT  
TCATCTCTCTTTTCAACAAACAGATCCAACAAAAAATCTTGAAGAAGTTCAGAAAT  
CAGTTAAACATGTTTCAGATTGAGTAA

>AA QryID: NC\_007332\_(-)\_857471\_857695 HitID: NC\_006360\_(-)\_831838\_832062  
rank=1 bitscore=89.0 eval=8.0E-16 perc\_ident=74.32 perc\_cons=74.32 perc\_gaps=0.0  
query\_cvg=100.0 subj\_cvg=100.0 alpha=56.04 beta=3 prob=0.9921784846898027  
TTGGAAAGACCGATTAAACCCCAAACTGAAAAAACACGTAAAAAGAAGTATTATTTT  
CGTCTTTTTATAAGGAAATGAAAAGAGTGAAATGGCCTAGCGGCCGTGTTACCTTTAA  
AGTTTTGGTCAATCCTTGCTTTTTTCCACAATTTTATGTTTGTTTTTTTGCAGTTACG  
GTTATTGCGGCACTTATTTGGAATCAGGCTGGCGTCGGAATTTAA

>AA QryID: NC\_007332\_(+)\_243003\_243188 HitID: NC\_017509\_(+)\_239433\_239612  
rank=1 bitscore=56.2 eval=6.0E-6 perc\_ident=79.66 perc\_cons=79.66 perc\_gaps=0.0  
query\_cvg=96.72 subj\_cvg=100.0 alpha=78.36 beta=1 prob=0.9506326380420556  
GTGAAGATGCAAGCAAAAAACAATTTATCTCAATTTGTGAATATGATTTTTTCTTATAAA  
ATCAATTTTTTGCATTTTTATTTTTGAATATTTTTCTAGATCTTTCTCAATTAATAAA

ATTAAGCAAATTTTGAATAATAAATCAATTAAGTGTGCGTTCGAATCTAATAATT  
ATATAA  
>AA QryID: NC\_007332 (-) 531131\_531319 HitID: NC\_017509 (+) 263716\_263904  
rank=1 bitscore=51.6 eval=1.0E-4 perc\_ident=77.42 perc\_cons=77.42 perc\_gaps=0.0  
query\_cvg=100.0 subj\_cvg=100.0 alpha=77.42 beta=1 prob=0.9151943030855665  
ATGAAAGAAAAAAGCAAATGAGAATATTCTATTAGGGAATTTATTAAATTTGCAAAAT  
TCTAGTGTGAGAATTTAAACCAATTAATAATTTCAATTACAAACAGATTTAGATTTGCAT  
ATTCTAACTGTAAACAACAAATTGATATTGTAAATCAACTAATTAACAAACAAACAAAA  
AAACAGTAA  
>AA QryID: NC\_007332 (-) 264550\_264708 HitID: NC\_006360 (+) 186644\_186802  
rank=1 bitscore=46.2 eval=0.004 perc\_ident=76.92 perc\_cons=76.92 perc\_gaps=0.0  
query\_cvg=100.0 subj\_cvg=100.0 alpha=76.92 beta=1 prob=0.8670494141551359  
ATGAATAAATTAAATTTTTTCAAAAAATCGTTTAAATGTATAAAAAATATTATTAT  
TATTTTTTAACTTTTTATTTATCTTTATTTTATTATTTTAAATCAAAAAAGTCTAT  
AAATTCATAGGGTTTTAGGTAAAAAATCAATTTTTTAA  
>AA QryID: NC\_007332 (-) 689110\_689274 HitID: NC\_006360 (-) 651629\_651787  
rank=1 bitscore=51.2 eval=1.0E-4 perc\_ident=69.23 perc\_cons=69.23 perc\_gaps=0.0  
query\_cvg=96.3 subj\_cvg=100.0 alpha=67.95 beta=1 prob=0.7014466750718507  
TTGTATATGCCCAAAGATAAAAAATATTATGATAATTAAGAATTTTCACTAAAATATTCA  
ATAAATAAAAGTTTTTTCGGAAGCAACAAAAATTTTAACTCAAAAATTGAATTAT  
TTATATTCAATTTTAAATCTGGTTGGATTTTTTTCGCTATTAG

# • *Pseudomonas aeruginosa* PAO1

## vsORFs

>AA QryID: NC\_002516 (-) 3108663\_3108752 HitID: NC\_018080 (+) 2286700\_2286789  
rank=1 bitscore=95.2 eval=3.0E-18 perc\_ident=100.0 perc\_cons=100.0 perc\_gaps=0.0  
query\_cvg=100.0 subj\_cvg=100.0 alpha=44.3 beta=1 prob=0.9999805699936329  
ATGCTGCGTTACGTCGTGGGTTTTCTCGCGTTCACCGTGCTGGCGGCCTATCTGTTGCTG  
GGGGTTTCCCAGCACGCCTTCCTGCCGTGA  
>AA QryID: NC\_002516 (-) 3475171\_3475257 HitID: NC\_012560 (-) 3485013\_3485099  
rank=1 bitscore=63.0 eval=2.0E-8 perc\_ident=78.57 perc\_cons=82.14 perc\_gaps=0.0  
query\_cvg=100.0 subj\_cvg=100.0 alpha=22.25 beta=4 prob=0.9998849513624719  
ATGGACGACTACCAGGAAGAACTGCTGGAGCAGCATGCCGCCGAATGCGACCTGCCGGAG  
CCGGCGGACGACGCCACCGAGATGTGA

## sORFs

>AA QryID: NC\_002516 (+) 3116075\_3116305 HitID: NC\_017548 (-) 2403183\_2403413  
rank=1 bitscore=138.0 eval=1.0E-30 perc\_ident=100.0 perc\_cons=100.0 perc\_gaps=0.0  
query\_cvg=100.0 subj\_cvg=100.0 alpha=75.62 beta=133 prob=0.999931852177036  
ATGGACACGACCCGACACCTTTTCCAACCTGTTCCGCCAGTTGGGGCTCCCCGCTGGG  
CGGGACGACATCGTCGCTTTCTCGCCCGCACCTCGAGGAGGGCACGGCGCTGCC  
GATGCGCCATTCTGGAACCTGCCCAGGCCAGCTTCTGCGCGAGGCCCTGGCCGAGGAC  
TCCGACTGGGCCGAACAGGTGCGATGAACTGGCCTTGCAACTGACCCGCTGA  
>AA QryID: NC\_002516 (-) 5790181\_5790441 HitID: NC\_017548 (-) 5843638\_5843898  
rank=1 bitscore=139.0 eval=5.0E-31 perc\_ident=100.0 perc\_cons=100.0 perc\_gaps=0.0  
query\_cvg=100.0 subj\_cvg=100.0 alpha=75.99 beta=120 prob=0.9999318521770011  
ATGGCCAGGGCGAAGAGCAATACGCCGATCCTCCAGCTGGACGCCGCGCAGACTCAGGAC  
GCGGTACTGGCGATCAAGCGCTTCATGGAGGACCGCTTCGAACTGGAGCTGGGTTCTTC  
GAAGCCGAGGAACTGCTCGATTTCTTCGCCCGCGAGTTCCGCCCGTACTTCTACAACAAG  
GCCATCCTCGACGTGCAGTCGTACCTGAAGGAACGGTTTCGAAAGCATCGAGAGCGATGTC  
TGGGCGCTGGAAAAGAGTTGA  
>AA QryID: NC\_002516 (-) 2330591\_2330833 HitID: NC\_018080 (+) 3257097\_3257336  
rank=1 bitscore=131.0 eval=1.0E-28 perc\_ident=92.5 perc\_cons=95.0 perc\_gaps=1.25  
query\_cvg=100.0 subj\_cvg=100.0 alpha=66.24 beta=105 prob=0.999931852169476  
ATGAACCGAGCCAAGCTCTACCTCTGCTGCGTGCCTACTGCTGGTGCCGGCCATCGCC  
GGTGCGGCGACTGCCGACTACGTCTACGGCATGCCGCTGGACGTGGCCAGGGTGTGAGC  
GTCGACGAGGCGCCAGCGATACCTGCCAGGTGGTGCGCGCCACCCTGGTGTACCTGGAC  
TCCCACGCGGAGCGCCAGGTGTTGCACTACCTGAAGCAGGCGCGTGCCTGCAGCGACGAA

TGA

>AA QryID: NC\_002516\_(-)\_433933\_434103 HitID: NC\_011770\_(-)\_427674\_427844  
rank=1 bitscore=89.7 eval=4.0E-16 perc\_ident=96.43 perc\_cons=96.43 perc\_gaps=0.0  
query\_cvg=100.0 subj\_cvg=100.0 alpha=78.12 beta=134 prob=0.9999318416516995  
GTGGAGGGCAAGGCCAACGCCCATCTGCTGACCTTCCTCGGCAAGGCCTTCGGCGTGCC  
AAGAGCCTGGTGAAGTCTCGAAAGCGGCGAGCTGAACCGGCAGAAACGGGTGCGCATCCGC  
CGTCCGACCCGATTGCCGGAGGAACTGGGGATCGCCGCTCGACCCGCTTGA

>AA QryID: NC\_002516\_(-)\_5204648\_5204830 HitID: NC\_018080\_(-)\_5306068\_5306250  
rank=1 bitscore=108.0 eval=6.0E-22 perc\_ident=100.0 perc\_cons=100.0 perc\_gaps=0.0  
query\_cvg=100.0 subj\_cvg=100.0 alpha=65.0 beta=72 prob=0.9999297654096436  
ATGCTCGAAAGCCAGGCCTATAGCTGCCCTTACTGCGGGGAACCGGCCGAGGCGCTGCTC  
GACCTGAGCGCCGGCGACACAGCAGTACTACGAGGACTGCCCGGTGTGCTGCCGGCCGATC  
CTGTTGACCTGCGCACCGATGGGCGAGGACTGGTCACTGAACGTCCGCCGGGAGGATGAC  
TGA

>AA QryID: NC\_002516\_(-)\_1204785\_1205006 HitID: NC\_017548\_(+)\_4353149\_4353370  
rank=1 bitscore=148.0 eval=9.0E-34 perc\_ident=100.0 perc\_cons=100.0 perc\_gaps=0.0  
query\_cvg=100.0 subj\_cvg=100.0 alpha=43.6 beta=63 prob=0.9998604836496923  
ATGCCTGGCCATCCCGATCCACTGCACGGCGTCACCCTGGAAAACTGCTCACCGAACTG  
GTCGCCACACCGGCTGGGCGGAGCTTGGCAAACGGGTGACATTCTGTTGTTTCAGGAAC  
GACCCGAGCATCAAGTCCAGCCTCGCCTTCTGCGCAAGACGCCCTGGGCCCGGAAAAAG  
GTCGAGGCGCTCTACGTCCAGCTCAAGCGCAACCAAGGCTGA

>AA QryID: NC\_002516\_(-)\_5836470\_5836685 HitID: NC\_017548\_(-)\_5891309\_5891524  
rank=1 bitscore=119.0 eval=6.0E-25 perc\_ident=100.0 perc\_cons=100.0 perc\_gaps=0.0  
query\_cvg=100.0 subj\_cvg=100.0 alpha=80.01 beta=57 prob=0.9987903920907717  
ATGGGTTTCTGATACTCTCCCGCCGAGAAGGCGAAGGCATCACCTGTCCCTCAAGGCC  
GACTACCCGGCGGAGGAACTGATTCGGCAATTGCGCGAAGGCGGCATCCGGATCCTGGTC  
ACCGATATCATCGGCAACCAGGCCCGGGTCGGGATCGAGGCGCCGCGTGGCGTCCTGATC  
GTTGCGGACGAGTTGAAAACGGCACCGAAAGGCTGA

>AA QryID: NC\_002516\_(-)\_5204385\_5204648 HitID: NC\_017548\_(-)\_5244318\_5244581  
rank=1 bitscore=98.2 eval=2.0E-18 perc\_ident=68.97 perc\_cons=68.97 perc\_gaps=0.0  
query\_cvg=100.0 subj\_cvg=100.0 alpha=68.97 beta=25 prob=0.9984031905199666  
ATGCAGCGCGTATATGAGCCGCGCCGACCTGCTGGAGGCCGAGATGCTGGTGGGAATGCTC  
GCCAGCGAAGGGATCGCCGCCCATGTCAGCGGCCGCCACCTGGTCGGCGCCATCGGCCGAA  
CTGCCGCTGGCGGACTGCTGGCGTTGTTGGTGGCGGACGAGCAGACGGAGCGGGCGCGA  
GAACTGATCCTCGCTACAACGCCCGCCCGCCCGTTGGCCGAGGAGCCCGCGGAGCCCTGC  
GGCCCCGGCAGCCTGTTGTGTTGA

>AA QryID: NC\_002516\_(-)\_1997217\_1997465 HitID: NC\_011770\_(+)\_3870638\_3870865  
rank=1 bitscore=116.0 eval=3.0E-24 perc\_ident=82.67 perc\_cons=82.67 perc\_gaps=0.0  
query\_cvg=91.46 subj\_cvg=100.0 alpha=44.71 beta=31 prob=0.9984012049520422  
ATGGAAAAGGGAGGACCACCGATGGGTATCGAGACGGAAGAACCGAACCAGAAGCCGCCG  
ACCTTCTGGCAGATGCTGCATAGCGTGATGGCTGCCGCTTCGGCGTACAGAGCGGGCGA  
AACCGCGCCCGCGACTTTACCCACGGCAAGCCCGTGCACCTTCATCATGCTGGGCCTGCTC  
TTCACCTGGTGTTCGTGCTGTTGCTGGCCGGGATCGTGAACTGGTGTGAGCCTCAGC  
GGCCTGTGA

>AA QryID: NC\_002516\_(-)\_3115699\_3115896 HitID: NC\_018080\_(+)\_2279555\_2279752  
rank=1 bitscore=105.0 eval=6.0E-21 perc\_ident=100.0 perc\_cons=100.0 perc\_gaps=0.0  
query\_cvg=100.0 subj\_cvg=100.0 alpha=100.0 beta=43 prob=0.9983972660091031  
ATGTCCAGAATCGAAGTCCCGTGCTGGTGGGGACGTCCGTTCCCGAATCGCTGCGCAGC  
AAGGGATTGCTGGCCTGTTGGATCCTGATGGTGGACGGCGCCATGTGGGCCGGCCCTTC  
ACCAGCCGTGACGAGGCGGAAGCCTTGAAGGGAACCTGGGAACTGAGTTGGCCGCTGGAG  
GCGGCGATCTCCGCCTGA

>AA QryID: NC\_002516\_(+)\_4352524\_4352769 HitID: NC\_008463\_(-)\_1172887\_1173132  
rank=1 bitscore=112.0 eval=1.0E-22 perc\_ident=85.19 perc\_cons=85.19 perc\_gaps=0.0  
query\_cvg=100.0 subj\_cvg=100.0 alpha=85.19 beta=31 prob=0.99839607862993  
ATGCACTGGCTGGACTACCTGCAATGGCCCGCCATGCTGGTACGGTGGTGGCCGCTGG  
CTGGTGGCGTCGGCGCATCGGCGAAGACGCAAGGTGCGCTTCTGGGTGTTCTCGCCAGC  
AACCTGCTGTGGATCGCCTGGGGCCTGTACGCCAGGCCTATGCGCTGATCCTGCTGCAG  
GTCTGCCTGGCGGCGATGAACCTGCGCGGCACCCATCGCAACGAAGCGCCACAGGACAGC  
GCCTGA

>AA QryID: NC\_002516\_(+)\_796960\_797241 HitID: NC\_007274\_(+)\_82424\_82672  
rank=1 bitscore=120.0 eval=4.0E-25 perc\_ident=82.72 perc\_cons=93.83 perc\_gaps=0.0  
query\_cvg=87.1 subj\_cvg=98.78 alpha=48.62 beta=22 prob=0.9983949184128597

GTGTTCCACAGCAATGGAGGTACCGGCTCATGCGAGTCGAGACAATTAGTTATTTGAAA  
CGTCATGCGGCTGACCTGGATTTATCCGAGCCAATGGTCGTACGCAGAACGGTGTTCTT  
GCCTATGTGGTTGAGTCATATGCTGAGCGGAAGCAGCGCGATGAAGCAATTGCGCTGGTG  
AAGTTGCTTGCGATTGGCTCCCGCCAGTACGCAGAAGGCAAGCATCGCTCTGTTGATGAT  
TTGAAAGCTCGCCTTTCCAGGAGGTTTCGCTCAGCCAGAATAA

>AA QryID: NC\_002516\_(-)\_788542\_788808 HitID: NC\_018177\_(+)\_1590952\_1591191  
rank=1 bitscore=110.0 eval=4.0E-22 perc\_ident=70.89 perc\_cons=84.81  
perc\_gaps=1.27 query\_cvg=88.64 subj\_cvg=100.0 alpha=49.91 beta=15  
prob=0.9983948907099858

ATGAGCACGTCAGCCGATAGACAAGACTATTAATCAAGAAAATCGGCCCAAAAAGGTC  
AGCCTTCACGGGGGCGATTACGAGAGATGAAAAGCGTCAGCAAAGGCGCGATTGCGGTG  
AGCACGGAAGAAATCGACGTCCTAGTAAAAATTTCCCTAATTACGCATTATGGATTGCA  
AGCGGTTCCATCGCCCCAGAGTCGGCCAACTAGCCCCGACTATGACGAAGCCAATCGA  
AACTTGTTCAATCAAACGCGGGATAG

>AA QryID: NC\_002516\_(-)\_1029541\_1029732 HitID: NC\_017548\_(+)\_4528381\_4528599  
rank=1 bitscore=109.0 eval=5.0E-22 perc\_ident=98.41 perc\_cons=100.0 perc\_gaps=0.0  
query\_cvg=100.0 subj\_cvg=87.5 alpha=78.12 beta=30 prob=0.9983947801834276

ATGAGTGTGACAGTGACCGAGCGTGACGATGACCACAAATCCCGCGAGCTGCGTGCGCTT  
GGCCGCCGCTGCTGGGACGTGCATCAGCAGGGACTGCTGGTTGGCGTCTTCCATAACGAG  
GATGACGCCCCACGCTATCGGATCAAGCTGGAGAAAGAAGAAGAACTGCGGCAGATAGGT  
GAATCGGCCTGA

>AA QryID: NC\_002516\_(+)\_863437\_863664 HitID: NC\_008463\_(-)\_4794285\_4794494  
rank=1 bitscore=132.0 eval=5.0E-29 perc\_ident=98.55 perc\_cons=98.55 perc\_gaps=0.0  
query\_cvg=92.0 subj\_cvg=100.0 alpha=64.55 beta=28 prob=0.9983947068239909

TTGTGTTTCGGGTCCGGAATGTCGATGCGCACACTTTTCTCCCTTCTCGTCGGTGTCGTC  
CTGGCGGGTTTCTCCGGCCTCGCGGCGCAGGCCGCGCCGGCGCCCTTCTACAAATGGCAG  
AGCAAGCTCGACGGTCAGGTGCGCTGCATGCAGACCTCGCCGGGAGACGGCTGGGTCAGG  
CTCGACGGCCCCCTACCGCGATCTCCGCTGCCGCGAACCCCTGCGCTGA

>AA QryID: NC\_002516\_(-)\_3112422\_3112667 HitID: NC\_008463\_(+)\_2461317\_2461550  
rank=1 bitscore=114.0 eval=1.0E-23 perc\_ident=88.31 perc\_cons=88.31 perc\_gaps=0.0  
query\_cvg=95.06 subj\_cvg=100.0 alpha=68.95 beta=21 prob=0.9983946879532322

ATGGAGCGCACCATGTCTGTGACCTGAAGAAAATCGCCGCTGCCTTTCCCGAGTTCCAG  
TTGTCCAGCAAGAGCCGCCACGACGGCGCGCTGTTGTTGCAGTTGCAGGCCGCCGACGGC  
CGCTACGTGGCTCGCACCATACCTCGCCGCGAGCTCAGCGCGCCGCCGAGACCGAGTGG  
CTGATCCGCGAGCATCCGCCGGGAAGTGGCCGTGCCGGGCATGGAAATGGCGATGGCGGCA  
CGCTGA

>AA QryID: NC\_002516\_(-)\_944467\_944706 HitID: NC\_008463\_(+)\_4706899\_4707138  
rank=1 bitscore=141.0 eval=1.0E-31 perc\_ident=98.73 perc\_cons=98.73 perc\_gaps=0.0  
query\_cvg=100.0 subj\_cvg=100.0 alpha=66.43 beta=25 prob=0.9983946753829486

TTGGCCGATAGATGTTTTTCGGCCAACTAGACTGGCACCATCGTTACCGTCCCTGTCA  
GCCGCCATGAACCTACCTGATCTCCCTCGGCATCGGCCTGCTGGTCGGCGCGCTCTACGCC  
GTCCTCGACTTCCGCTCGCCGCGCCCCCGCCATCGCCCTGGTCGGCCTGCTTGGCATG  
CAGCTCGGCGAACAGCTTTTCCCCCTTGGCCGCGACCTGCTGCAGAGTGGCTGCACTGA

>AA QryID: NC\_002516\_(-)\_5242571\_5242849 HitID: NC\_018080\_(-)\_5344003\_5344281  
rank=1 bitscore=183.0 eval=3.0E-44 perc\_ident=98.91 perc\_cons=98.91 perc\_gaps=0.0  
query\_cvg=100.0 subj\_cvg=100.0 alpha=40.84 beta=18 prob=0.9983946591396617

ATGATTCTGACCTTTCGCTGCGACGAGACTCGTCAGCTTTTTGAGACGGGTCTTTCGAGG  
CGGTGGGGAGCGATCCTCACAGTCGCTACGCGTAAGCTCGCAATGCTTCATGCGGCTACG  
GAGCTTCGAGACCTGCGCTCTCCACCTGGAAACCGGTTGGAGCCGTTGCAGGGAAAGCGG  
GCGGGCCAACATAGCATCAGGATCAATGACCAGTGGCGTGTCTGTTTCGTCTGGACGGAT  
GCGGGTCCCGAAGAAGTCGAAATAGTTGATTACCACTGA

>AA QryID: NC\_002516\_(-)\_4215259\_4215537 HitID: NC\_011770\_(+)\_1321968\_1322246  
rank=1 bitscore=131.0 eval=1.0E-28 perc\_ident=86.96 perc\_cons=86.96 perc\_gaps=0.0  
query\_cvg=100.0 subj\_cvg=100.0 alpha=69.88 beta=8 prob=0.9983946560534553

ATGGCGGGCGATGCGGACTCCAACCTCGTCGCCCGACCTTCTCCCGAGGTTCCGCCGGTC  
TCTCCCGGCGACACCTTTCGGCTCTGTACCTGCGGGGCTTCGGCTTCGCTTCCCGATTGT  
CCCGCCGACTGCCGCAACGGCCTGACGCTCCACGCGACCCGCGAGCGCCTGTTGCTGTTG  
TGCCGCTGCGGGCGCTCCGCCGACCTGCCGTATTGCGACGGCAGCCATGCGCCTTCCGCC  
TCCGGGCTGAAGGCCAGGTGGCGGCGTTTCCGCGGCTGA

>AA QryID: NC\_002516\_(-)\_3129158\_3129454 HitID: NC\_008463\_(+)\_2444516\_2444812  
rank=1 bitscore=160.0 eval=2.0E-37 perc\_ident=97.96 perc\_cons=97.96 perc\_gaps=0.0  
query\_cvg=100.0 subj\_cvg=100.0 alpha=70.03 beta=6 prob=0.998394655892463

TTGCGGGTTTTATTCAATCTGGGTGAATGCGTGCAGGAAATCTACTCTGAAGAACAGATG  
 CGCAAGGCGCTGGGCCTTGCCGAAACGCGACCGAAAAAGGTCCGGACCGAGGCCAGCCAG  
 CCGGTCCGCTACACCATCGCTCGAACTGAGCGTGCGCAAGGGCGGGGCGGGATTGCCGCTG  
 CGTTTCGAACATCGCTCGCGCTCCATCAGCAAGGTCACCGCGCAACTGGAAGCGGAGAAG  
 GAAGCCAAGCGCCAGGGTTACCAGGTCTGGGCGCTGCTGGATATCCGTCAGATCTGA  
 >AA QryID: NC\_002516\_(+)\_1246805\_1247077 HitID: NC\_009656\_(-)\_3134080\_3134352  
 rank=1 bitscore=156.0 eval=4.0E-36 perc\_ident=96.67 perc\_cons=98.89 perc\_gaps=0.0  
 query\_cvg=100.0 subj\_cvg=100.0 alpha=54.45 beta=2 prob=0.9983946558747414  
 ATGAGCATGGCACTTATTGATCTTGCAAGAGATTTTTGGATGGATCGTTAAGCGGAAAG  
 AGTTTCACAAAAAATTCTTTGAAATGTGGCGTAGCGAAGGTGCGTCAGGCTTGCTGAAA  
 AAGGATGATGATAATCTTGCGCTTGCTCAGGCTTATGTTTGAATGGCAGATTGCTTC  
 ACGGATGGACCGAAGGATAATGATGTTGAGATAAATGAAGAGGAGCTAAAGCAGGAAGTT  
 AGAGGGCTTTTTGAAGAAATATAAATATATCTAG  
 >AA QryID: NC\_002516\_(+)\_1247493\_1247726 HitID: NC\_018080\_(-)\_4294284\_4294517  
 rank=1 bitscore=136.0 eval=4.0E-30 perc\_ident=98.7 perc\_cons=100.0 perc\_gaps=0.0  
 query\_cvg=100.0 subj\_cvg=100.0 alpha=98.7 beta=3 prob=0.9983946557457779  
 ATGACTGTATTGATTTCTGGGTACCTACCATCGGGAAATGATGAGTCCTTGAAATATGAA  
 AAAACTGTTCTTTTGAATATATTTGAAAGTTATGGAGGTGATGCGTTGGAAGAAGGGT  
 GAGAATATTGAGGGTGAATATCCTATTAAGAATGATGATGTTGTAAGGATTGAGGAGGTT  
 ATAGGCGAAAAGCTTCCGGTTGGATTGGAGTATTTTATTGGGGTTTACGCCTAA  
 >AA QryID: NC\_002516\_(+)\_2395691\_2395912 HitID: NC\_011770\_(-)\_3476599\_3476820  
 rank=1 bitscore=119.0 eval=4.0E-25 perc\_ident=100.0 perc\_cons=100.0 perc\_gaps=0.0  
 query\_cvg=100.0 subj\_cvg=100.0 alpha=79.02 beta=16 prob=0.9983946547985433  
 ATGGCCAGCCATCTGTTCTGATCAGCTACATCCTCGACGACCAGCCGATGACCTGCGAA  
 TTGCACAGCGAGGCGGATACCTCAGCCGCGAAGAGGCCCGCCGCGCCACTTGAGGCGACTG  
 CATCGACCGCACGACGCCGAGGCGATCAGCGATATCCAGGTCAGCAAGGTGGAGCGTACC  
 CATGAGCCGGGACACCGCCGGGACACTACCAGCAGCCCTGA  
 >AA QryID: NC\_002516\_(+)\_3087813\_3088037 HitID: NC\_018080\_(-)\_2330387\_2330608  
 rank=1 bitscore=118.0 eval=1.0E-24 perc\_ident=85.92 perc\_cons=91.55 perc\_gaps=0.0  
 query\_cvg=95.95 subj\_cvg=97.26 alpha=50.78 beta=1 prob=0.9983946504321477  
 ATGACCATCAAGAAAGCTTCTTTTGAAGTCTCGGCATTTAAAAGTCGGTTATCAGCTT  
 TATGAAAGCCGTCATAGCGACTGGGAACGTCGTGGCAAACACGGCAAATTCCTACCTG  
 CGGTTGAGTGGCGATTGGCTGGAGGCTGCGGGCTTTGAGGTTGGCTGCAAGGTGAGCATT  
 CAGGTCACCAGGCGGCGCCTTGTATGCAAGTGGTTGAGGATTGA  
 >AA QryID: NC\_002516\_(+)\_1039035\_1039229 HitID: NC\_008463\_(-)\_4612305\_4612499  
 rank=1 bitscore=107.0 eval=1.0E-21 perc\_ident=98.44 perc\_cons=98.44 perc\_gaps=0.0  
 query\_cvg=100.0 subj\_cvg=100.0 alpha=72.47 beta=15 prob=0.9983946435746068  
 ATGCTCCCAATGTGCAACAAGGTCGTCCATTTGCATCACAAGGATGAGCAGGCAGCGCTT  
 GAGCGTTTGAACCGGATTACCGGGCTGCAGTTCAGCAGTTGGCCGGAGTCGCTGGTGCCG  
 GCGCGCAGCGTCAGCGAACCGTCGCCTGAGAAAGCGCGGGACGAACCCCTGCTCGATCAG  
 GTGCGCCAGGGCTGA  
 >AA QryID: NC\_002516\_(+)\_788894\_789142 HitID: NC\_015410\_(+)\_2851324\_2851539  
 rank=1 bitscore=108.0 eval=1.0E-21 perc\_ident=80.28 perc\_cons=91.55 perc\_gaps=0.0  
 query\_cvg=86.59 subj\_cvg=100.0 alpha=57.69 beta=14 prob=0.9983946374830972  
 ATGGCTAATGCCACGAATAGTACGGAATGAGCATGGAAGTGAAGAGCTTAGCCCCAGT  
 GCCCTGATAGGGCCGCAACAGGATGTGGAGTCCATCGAACGGTGGGCGGAGCGCAACGGC  
 ATCAGCTACGGCACCGCTCGCGCCTGGGTTTACCGGGGTGTGCTGCCGTCGGTGAAGCTG  
 GGGAAAGCTGCGCATGGTGAATAGCGCGCTGCTGCGTACCTGGCTGTTGGAACAGGAATGG  
 AGTGCCTGA  
 >AA QryID: NC\_002516\_(-)\_3281676\_3281858 HitID: NC\_011770\_(+)\_2313292\_2313474  
 rank=1 bitscore=104.0 eval=1.0E-20 perc\_ident=98.33 perc\_cons=100.0 perc\_gaps=0.0  
 query\_cvg=100.0 subj\_cvg=100.0 alpha=82.11 beta=5 prob=0.998394631988478  
 TTGCTGCGGCAGGCGCGGGACGACTGTCGCGGCGACCGCCTGTTCACTTCCTGCAACCGC  
 TCCAACCTGCCGATGCGGCGCCTGCTGGAGCGCAAGGGATTCCAGCCGAGCGGGGTGATC  
 GACAACCTCGACGAAGGTGATCCGAGCTGGTCTTCGTGCGTTTCTCGCGCCGTCGCGC  
 TGA  
 >AA QryID: NC\_002516\_(-)\_2357593\_2357781 HitID: NC\_018080\_(+)\_3230148\_3230336  
 rank=1 bitscore=103.0 eval=3.0E-20 perc\_ident=100.0 perc\_cons=100.0 perc\_gaps=0.0  
 query\_cvg=100.0 subj\_cvg=100.0 alpha=100.0 beta=5 prob=0.9983946305361526  
 ATGCAGGCTTTTCATGGTTCAATTTCTCAGACGCCGACAACCCGGCCGACCGTGCTCACC  
 ACTTTTCGCGCAACCCCTCAGCACCAGCGAGGCGCACGTTTCGCTGCAACTCTGCTATCCC  
 CTGCTGTTCCCGCAGCGTCTGAGCGCGGTGCGGGTCTACCCCTGCTGCCGGCGGGCGGCA

CGCGAGTGA

>AA QryID: NC\_002516\_(+)\_4629605\_4629811 HitID: NC\_008463\_(-)\_898045\_898251  
rank=1 bitscore=103.0 eval=4.0E-20 perc\_ident=94.12 perc\_cons=98.53 perc\_gaps=0.0  
query\_cvg=100.0 subj\_cvg=100.0 alpha=72.95 beta=1 prob=0.9983946188644237  
TTGGCGCATCATCTCATAAAAATAGCGAACCGCTTCCCAGTACCCACGAATATCAATGGA  
TCAGCAATATCCAGATGCTTATCGCGGCATTCGAAAAAACATCGACCAATTCCACTGACA  
GAATATCGGCGTCATTTGCCTAGCATGGATATTCCAAGTTCACCCTATCAACTTCCCAGA  
TTGACACTCTCGCCGGCAGATCAGTAA

>AA QryID: NC\_002516\_(+)\_5148616\_5148867 HitID: NC\_018080\_(+)\_5250026\_5250277  
rank=1 bitscore=107.0 eval=3.0E-21 perc\_ident=73.49 perc\_cons=73.49 perc\_gaps=0.0  
query\_cvg=100.0 subj\_cvg=100.0 alpha=53.95 beta=4 prob=0.9983946068095841  
ATGACAGACCGAGAGAAAGCTGGCCAGCCACCCCGTTTTCGTGGGGCGGGCGCTTTGC  
CGGCGGATGTTTCGCCGTCGATTCCAGGCCGCTACGCTGACGCTGAGCAGCGTACTGGCC  
GCCCTTACCGTCTCCGCTACCCTCGTCTGTCAAAGGCGTTCTGCCTGAGCGAGGCGGCG  
ACCATCGCCCCGTGCGAGGTCTGGGTGGGCCTGGCACTGCTCGCGGCCATGGTGCTGCCG  
CTCAAGACCTGA

>AA QryID: NC\_002516\_(+)\_2894147\_2894377 HitID: NC\_017549\_(+)\_3899151\_3899381  
rank=1 bitscore=96.3 eval=5.0E-18 perc\_ident=100.0 perc\_cons=100.0 perc\_gaps=0.0  
query\_cvg=100.0 subj\_cvg=100.0 alpha=100.0 beta=6 prob=0.998394580369009  
ATGGCTGAACCCCGAGGACAAGTACACCCGGCGCACAGGCAGGACCTGGGCGGACGACCAG  
GCGACCTACAACCGTCTGCGCGAAGAAGCCGACGCCGCTCGCCAGAAGCTGCGCGAAAGC  
GGCTACAGCGGCGCCGAGTACGACCAGTTGCGTCAAGCCGCCTTCGATCTCAACCGCAAG  
GCCAACCAGTACTGGGAGCAGATGCTCAGCGACCTGCGCCAGGAAGACTGA

>AA QryID: NC\_002516\_(+)\_6110801\_6111010 HitID: NC\_017549\_(+)\_6602226\_6602435  
rank=1 bitscore=100.0 eval=2.0E-19 perc\_ident=85.51 perc\_cons=85.51 perc\_gaps=0.0  
query\_cvg=100.0 subj\_cvg=100.0 alpha=85.51 beta=1 prob=0.9983945633464513  
ATGGATACCCTTCATCCCTTCTTTTATACCCGGCGCCCCGGCCAGCCGCGGCGCCACGC  
TCACCGGTGCGAGAGGGATACCAACTTTCCTCTCTACACTCTGAGGGACACGGCGACCTG  
CGGTGTCCCTTCTTTTTTTCACCGCTCAAGACGGCCCGCAGATCTTCCCCGTTGCCGAGG  
TGTTGTGTGGCTGCGCTCACCTGTGGATAA

>AA QryID: NC\_002516\_(+)\_1997037\_1997192 HitID: NC\_008463\_(-)\_3637485\_3637640  
rank=1 bitscore=87.8 eval=1.0E-15 perc\_ident=98.04 perc\_cons=98.04 perc\_gaps=0.0  
query\_cvg=100.0 subj\_cvg=100.0 alpha=98.04 beta=24 prob=0.9983943904119121  
ATGTCTTCGTCCCGATACCCACAAGAAACAGGGGGAGTCATGAGCGAGCCGAGCAAAACC  
CAGGAAAACCGCGACAGCGTGGTCGACGCCTGCGCGGCCTTCGTCCTGATCCTGCTGGTG  
GTGGCTACCGCGGTGTTCTGGGTCAGCCACCACTGA

>AA QryID: NC\_002516\_(+)\_1947994\_1948215 HitID: NC\_017549\_(+)\_2879993\_2880214  
rank=1 bitscore=93.2 eval=3.0E-17 perc\_ident=83.56 perc\_cons=83.56 perc\_gaps=0.0  
query\_cvg=100.0 subj\_cvg=100.0 alpha=83.56 beta=9 prob=0.9983943719080577  
ATGTCGATGAAATGGACCGAGCAGCGCTTGCAGCAAGGCTCTCAAGCAGATGGCGAACAAT  
CATGAATCGGCTGCGGTGCGAGGTGATGCGCGCCGTCGAGCGGGCGAACGATCCGAAGCTG  
GCGCAGCGCCTGCTCGAGGTGATCGAGCAGATGCACCAGGATGCCGATGCGCTGCGCTCC  
ATCGACGACGAAATCGCCAGCGGCGTATCCGTTGCCAATGA

>AA QryID: NC\_002516\_(-)\_4330029\_4330187 HitID: NC\_008463\_(+)\_1195465\_1195623  
rank=1 bitscore=87.4 eval=2.0E-15 perc\_ident=100.0 perc\_cons=100.0 perc\_gaps=0.0  
query\_cvg=100.0 subj\_cvg=100.0 alpha=100.0 beta=1 prob=0.998394308303401  
ATGGACGCTTCCACGAACGAGCGATACCGCAAAGGGAAGAATGGAGTGCAACCATCGTA  
GAGCTTCAAACCTGAGATATTGCAGTTGATTGCCGCATCTGGCCGGCCTATTGCCGTGCAT  
TTTCTACCCACTACTGCATCGCTCAAGAAGGTTCTGTAA

>AA QryID: NC\_002516\_(+)\_2893100\_2893246 HitID: NC\_017549\_(+)\_3898104\_3898250  
rank=1 bitscore=84.7 eval=1.0E-14 perc\_ident=100.0 perc\_cons=100.0 perc\_gaps=0.0  
query\_cvg=100.0 subj\_cvg=100.0 alpha=71.57 beta=10 prob=0.9983941524140378  
ATGCGCTTGCGTTGTTTCTTGCGAGGTTGCCGCTGGGACGAAGGTAGCCTGGTCACGGTA  
GGCCCCGACCTGATGCTGCGCCAACGTTGCCGGCGTTGCGGCGCCCATCGCTATCTCAGC  
GTCGAGGCGCCGCCGAGGAAGCCTGA

>AA QryID: NC\_002516\_(+)\_1372752\_1372916 HitID: NC\_017548\_(-)\_4181593\_4181757  
rank=1 bitscore=84.7 eval=1.0E-14 perc\_ident=98.15 perc\_cons=98.15 perc\_gaps=0.0  
query\_cvg=100.0 subj\_cvg=100.0 alpha=81.34 beta=2 prob=0.9983940539144691  
GTGGCCGGGCATGTGCTCGCCGGCGAACTGGGGATCAGCCTGCGCACCCCTCTACCGCGAT  
ATCGCCACCCTGCGACAGCAGGGCGCGCACATCGAGGGCGGCGCCGCGCACCAGGCGTTGC  
TGCGCGAGTGCGGTGAACGGGAAGCATCGCCGCGCAGTGAGTGA

>AA QryID: NC\_002516\_(-)\_227147\_227311 HitID: NC\_009656\_(-)\_295035\_295199

rank=1 bitscore=87.0 evalue=3.0E-15 perc\_ident=83.33 perc\_conserv=87.04 perc\_gaps=0.0  
query\_cvg=100.0 subj\_cvg=100.0 alpha=58.55 beta=1 prob=0.9983937461436297  
TTGCATGATTGGCAAGGAGGCTTAGCGCCTGAAGTAATTATTTTGTATGGAAATAACT  
TCTGGAGCTATGGGTTTCGCCCTATCGCCACAGGCCGCGTGGTTGGCGGGCTACAGCGA  
TCCGACGAAAAACCCATGCCTTGCGGGCATGAAAAATATTCCTGA  
>AA QryID: NC\_002516\_(+)\_3131246\_3131416 HitID: NC\_011770\_(-)\_2472235\_2472405  
rank=1 bitscore=87.0 evalue=3.0E-15 perc\_ident=80.36 perc\_conserv=80.36 perc\_gaps=0.0  
query\_cvg=100.0 subj\_cvg=100.0 alpha=80.36 beta=7 prob=0.9983936981279575  
ATGAGCAAACCTGCAACATATCGGCCTGTTCTGTTCTTCTTTCCGCCGGCCTGGCG  
CTCGGCTACCGAGTCGACTGCCCGGACGGCAGCCATGTCGAGACCTACCTGCTTCGCGGC  
CTGGGCGCGCCTCTCTCGCAACGATCTCTGCGAGCAGGCAGCGCCCTGA  
>AA QryID: NC\_002516\_(-)\_223679\_223822 HitID: NC\_009656\_(-)\_291566\_291709  
rank=1 bitscore=80.5 evalue=2.0E-13 perc\_ident=97.87 perc\_conserv=97.87 perc\_gaps=0.0  
query\_cvg=100.0 subj\_cvg=100.0 alpha=75.76 beta=1 prob=0.998393412815203  
ATGACCGGCTATCAGGTCAAGCCGCTACGGCTTCGACGGGAAAATATCCTGCCAGCGCCG  
CGGAATGCCGGGGTAATTAATGTTTTTAATACGCTGTATCAGCAATCCCTGATGCCTGGC  
CAAAGTAGCAAAGTAAACTTTGA  
>AA QryID: NC\_002516\_(-)\_5885170\_5885325 HitID: NC\_017549\_(-)\_6376900\_6377031  
rank=1 bitscore=75.1 evalue=1.0E-11 perc\_ident=100.0 perc\_conserv=100.0 perc\_gaps=0.0  
query\_cvg=84.31 subj\_cvg=100.0 alpha=67.5 beta=28 prob=0.998391624653196  
TTGCCTGGAAGGGGGAGGCAATCGATGAAGCGCAAGCCAGACTTGCTGTGGGTTTTGGTC  
ATCATCTTCGGACTTGGGGTCGTCACCACCGGTTATACCCAGAGCCTCTGGGAACGACAG  
GCCAGCACGCCCGCCAGGTGACGCAACAGCCGTAA  
>AA QryID: NC\_002516\_(+)\_273398\_273553 HitID: NC\_018080\_(+)\_266090\_266218  
rank=1 bitscore=75.5 evalue=7.0E-12 perc\_ident=100.0 perc\_conserv=100.0 perc\_gaps=0.0  
query\_cvg=82.35 subj\_cvg=100.0 alpha=91.18 beta=1 prob=0.9983905742603055  
ATGGACATGAGCGGGTACCCGATTCTTGAAATTGTTATGTCGCGTGGGTTGCGCAGGTGC  
CCGGAAAGAAGCGCGGAGCGCTTCCGGCAGATCGGGACGGCCTGCACGGGTGGCAGCGAT  
GGTGCGCGATTGGTCGAAAAAGCGTCAATTCGATAA  
>AA QryID: NC\_002516\_(-)\_3677199\_3677351 HitID: NC\_011770\_(+)\_1925483\_1925623  
rank=1 bitscore=72.4 evalue=6.0E-11 perc\_ident=95.65 perc\_conserv=100.0 perc\_gaps=0.0  
query\_cvg=92.0 subj\_cvg=100.0 alpha=69.93 beta=2 prob=0.9983880781328388  
GTGTGGCTGGGCTTGGCGGATATCGCTGCGCGATATGCGCCCTACGGAGGGGCGGCAATC  
CGTTTCGCTGGGCGAGCATCCGAAGTTGAGGAGAACGCCTGGGACCTGGCGAATATCGCC  
GACCGATATTCTCCAGCAGGGGCAATCCCTGA  
>AA QryID: NC\_002516\_(-)\_4189594\_4189716 HitID: NC\_017549\_(-)\_5253873\_5253995  
rank=1 bitscore=71.2 evalue=8.0E-11 perc\_ident=95.0 perc\_conserv=95.0 perc\_gaps=0.0  
query\_cvg=100.0 subj\_cvg=100.0 alpha=72.41 beta=1 prob=0.9983879636441977  
ATGTGCGGCTCTTTTGTTCATCATTGGCGATTTCGCCGCCCGCTGGCGGAATCCATC  
GCCAGGATGTGTCGTGGCCCGTACAGTGGTCGCGTCAACCTCGATTGCTCGGGGAACCA  
TAG  
>AA QryID: NC\_002516\_(-)\_630143\_630280 HitID: NC\_009656\_(-)\_687843\_687992  
rank=1 bitscore=72.4 evalue=6.0E-11 perc\_ident=95.35 perc\_conserv=97.67 perc\_gaps=0.0  
query\_cvg=95.56 subj\_cvg=87.76 alpha=46.05 beta=4 prob=0.9983878851821818  
GTGGCCGCAAAACGGATTGGCCGACCAACGAAAAACCTTCCGCACCAAGCGCGACGCC  
GAAGACTGGGCACGCCGACCGAAGACGAGATGGTACGCGGCGTGTACATCCAGCACTGC  
GGCTCCGAGCGCATGTGA  
>AA QryID: NC\_002516\_(+)\_53524\_53778 HitID: NC\_003295\_(-)\_3446534\_3446797  
rank=1 bitscore=84.7 evalue=2.0E-14 perc\_ident=46.43 perc\_conserv=64.29 perc\_gaps=0.0  
query\_cvg=100.0 subj\_cvg=96.55 alpha=18.75 beta=2 prob=0.9983874165005105  
ATGCCGAAGTACACGTGTACCTGTGGCTACGTTATGAACCTTCGCAAGGATGGTCAGAC  
TATGAGTTGACTCTAATTCCTGAGTCAGCAATAGAGAGCTTGGGGGATAGGCTAGATAGC  
GAGGATAAGCTGTCTTCTGATCAGTTATATGAAGCTCTTGATGAAAAGGCCATTACGGTG  
TACCGATGCCCGAAGTGTAGAAGGTTGCACTTGAGGAAGAGCCAAATAGATTACCACT  
TATATAGTTGAGTAA  
>AA QryID: NC\_002516\_(+)\_65535\_65678 HitID: NC\_017549\_(+)\_70194\_70331  
rank=1 bitscore=68.6 evalue=8.0E-10 perc\_ident=100.0 perc\_conserv=100.0 perc\_gaps=0.0  
query\_cvg=95.74 subj\_cvg=100.0 alpha=66.91 beta=4 prob=0.9983859428640773  
TTGCAAATGAAGAAAGTACTGTTGGCTGTGTTCTGCTCTGTGGCTTCTCTTACCGCC  
CAGGCCGCGTGCCCGTTTTTCGGCCCGTCCGAGGACCCGTGCAGCGGGCCGGTGTTCGGT  
CCGTCGACCTGCGAATGCCCTTGA  
>AA QryID: NC\_002516\_(+)\_5275967\_5276098 HitID: NC\_017549\_(-)\_968151\_968282



rank=1 bitscore=65.5 evalue=5.0E-9 perc\_ident=100.0 perc\_conserv=100.0 perc\_gaps=0.0  
 query\_cvg=100.0 subj\_cvg=100.0 alpha=72.56 beta=2 prob=0.9983815210214557  
 TTGCAGACGGCCCCGCTACAGCGAGCTTGGATTCTTCGATTCGTCGAACGCAAGTCAAGC  
 TTTATTCTGAAAATTATCAAAAAAATTCCAAGGAAGCTGCCATACCTTCCATAAAAAA  
 GCTGATCAATGA  
 >AA QryID: NC\_002516\_(+)\_2096384\_2096506 HitID: NC\_017548\_(-)\_3484561\_3484683  
 rank=1 bitscore=66.2 evalue=2.0E-9 perc\_ident=95.0 perc\_conserv=97.5 perc\_gaps=0.0  
 query\_cvg=100.0 subj\_cvg=100.0 alpha=74.37 beta=3 prob=0.9983797749568825  
 TTGATTTTGCAAAACAACAATATGTTGTGGATTCTGGCGGGCGACGCCGAGCCGGCGTTG  
 ATCTGCGTCAGCGTCCGGCGGATTGCCCGGGTTCCATTGGAGGTATTCCCCGTGCCCGGG  
 TGA  
 >AA QryID: NC\_002516\_(-)\_5386132\_5386254 HitID: NC\_008463\_(-)\_5656494\_5656610  
 rank=1 bitscore=65.5 evalue=4.0E-9 perc\_ident=94.74 perc\_conserv=97.37 perc\_gaps=0.0  
 query\_cvg=95.0 subj\_cvg=100.0 alpha=64.42 beta=4 prob=0.9983751928823636  
 GTGCGGGTGACCGTGGTGAACAGACGCTGCCTCTGAGAAACCGCGCCTGCGGCGCTTTC  
 CAGGAAGTCAGCCTGGAACGACGCGACTGCCGAGCCCATATCGGGCTGCAATTCCGCGAT  
 TGA  
 >AA QryID: NC\_002516\_(-)\_2901752\_2901982 HitID: NC\_018080\_(+) \_2618632\_2618841  
 rank=1 bitscore=74.7 evalue=1.0E-11 perc\_ident=63.77 perc\_conserv=65.22 perc\_gaps=0.0  
 query\_cvg=90.79 subj\_cvg=100.0 alpha=60.83 beta=2 prob=0.9983707819050818  
 ATGCTTCCACCGAGAAAAGACATGTCCGACACGCTCTCCTTCGCCTCGCGCCTCTGCAAG  
 TTCGTCATCCTTCTCGTCATCCTGCTGATCGGCGGCGCCAGCCTCTTCTGTGGTGGCTG  
 GGGCGGCCTTACCAGGACGCCATGTCCGCCTTCGTCCCGTTGCTCATGCCGATGCTCGTG  
 CTGGTGCTGGCGTTCGATACGTTCCGGGCCCTCGCCCGAACGAGGCGCTAG  
 >AA QryID: NC\_002516\_(-)\_1707664\_1707852 HitID: NC\_008463\_(+) \_3935669\_3935857  
 rank=1 bitscore=63.9 evalue=3.0E-8 perc\_ident=80.65 perc\_conserv=80.65 perc\_gaps=0.0  
 query\_cvg=100.0 subj\_cvg=100.0 alpha=80.65 beta=6 prob=0.9983512658634585  
 ATGCACCTACCGACGACGCGCACCTGCCCTACCAGCCTTCCGCCAACCCGGCCGGAACG  
 CCCGCGCGTCTACCCCGCAAGCACAGCCGCTGGCTGGAAGTGGAGCCGCTCTCCCTCCCT  
 CTCGAACTGGCCTTCTGGGCGCTCTGGCATTGCCGCCACGCGCGTCCGCCGGACGCTCGT  
 CACGCCTGA  
 >AA QryID: NC\_002516\_(-)\_1948236\_1948364 HitID: NC\_018080\_(+) \_3622014\_3622142  
 rank=1 bitscore=58.9 evalue=4.0E-7 perc\_ident=97.62 perc\_conserv=97.62 perc\_gaps=0.0  
 query\_cvg=100.0 subj\_cvg=100.0 alpha=97.62 beta=1 prob=0.9983512042529481  
 ATGTTACCGCCTTCGCCTTCCGCGGCCGCCAACCTTATACCGTTCGCCGGAACACAGCC  
 CAGGGCGCGACCTTGCGCCCGAACTGGCGAACCGGCCGGATGCGCCGGTTTCAGCCGGG  
 AAGTCCTGA  
 >AA QryID: NC\_002516\_(+) \_804381\_804560 HitID: NC\_009656\_(-)\_4917419\_4917592  
 rank=1 bitscore=66.6 evalue=4.0E-9 perc\_ident=63.16 perc\_conserv=70.18 perc\_gaps=0.0  
 query\_cvg=96.61 subj\_cvg=100.0 alpha=70.71 beta=8 prob=0.9983203164743983  
 ATGCTGATGGTCATGCGATTGTTGCGGGCTGCTACTGGCGGCCTTCCTGATGAGCGGTTGC  
 AGCGTTCGGGTGCCGGGCGCCTACGTCGAATGGATCCGTTTCGACGATGGCTACTACGGC  
 TACGATCGCGGCGGCCCGCCCATTTCTCCTCGGGCCACGCCAAGAAAGGCTGGTGCTGA  
 >AA QryID: NC\_002516\_(+) \_2165028\_2165204 HitID: NC\_008463\_(-)\_3468988\_3469164  
 rank=1 bitscore=63.2 evalue=4.0E-8 perc\_ident=68.97 perc\_conserv=68.97 perc\_gaps=0.0  
 query\_cvg=100.0 subj\_cvg=100.0 alpha=68.97 beta=4 prob=0.998302178292285  
 ATGTCTCGACAACGACAATGGACAGGAGTCGCCGCCATGCGCATCGCCGTCACCCTGGTG  
 TTGCCATCCTGCTGATCCTCAGCCTGCTCGGGTTTCGATTTCCTCTATTCCCGCCACCTC  
 GGCCAGGAAAGACCTGCCGCCTGCGCCGTCGGACAGGCCTGTCGGATCGTCCCCTGA  
 >AA QryID: NC\_002516\_(+) \_3108468\_3108644 HitID: NC\_018080\_(-)\_2286808\_2286984  
 rank=1 bitscore=61.2 evalue=2.0E-7 perc\_ident=67.24 perc\_conserv=67.24 perc\_gaps=0.0  
 query\_cvg=100.0 subj\_cvg=100.0 alpha=67.24 beta=6 prob=0.9982560450047004  
 ATGACTCCCGAATCCTTCGTACATTGCTGATCGTCGCCTGGCTGGGCCTCGCCGGCGTC  
 ACCCTGTGGGCCTTCCTGCGCGTGCCGCGTCGGCGCGCACGCCTGCAACGCAAGGCACGG  
 CAAGCCGAAAACCGGCATCCCGCACGGCCGCCACAGCCTCTCCGCAACGCAGCTGA  
 >AA QryID: NC\_002516\_(+) \_3581949\_3582080 HitID: NC\_018080\_(-)\_1809019\_1809150  
 rank=1 bitscore=52.8 evalue=3.0E-5 perc\_ident=95.35 perc\_conserv=95.35 perc\_gaps=0.0  
 query\_cvg=100.0 subj\_cvg=100.0 alpha=55.82 beta=1 prob=0.9982519862585504  
 ATGCTGCCACCATCCAGTTCGATCACCAGCATCCGCTCATGACAGACGAAATCGACGAT  
 GTACGGCCCGAGAACCTTCTGCCGACGAACTTCAGCCCGAGCAATCGATGCCCGCGCAA  
 AACTGCCATAG  
 >AA QryID: NC\_002516\_(+) \_5456318\_5456410 HitID: NC\_018080\_(+) \_5556395\_5556487

rank=1 bitscore=48.9 evalue=3.0E-4 perc\_ident=100.0 perc\_conserv=100.0 perc\_gaps=0.0  
 query\_cvg=100.0 subj\_cvg=100.0 alpha=74.24 beta=3 prob=0.9981877376261483  
 TTGCTCTGGAGCCTCGACGAAGAGATCCAGGCCGAGTGCACACCCCGCCGTCCACCGGA  
 CGGATGCCCCGACGACAAGCACGACGCCTCCTGA  
 >AA QryID: NC\_002516\_(+)\_4327194\_4327286 HitID: NC\_008463\_(-)\_1198334\_1198426  
 rank=1 bitscore=48.9 evalue=4.0E-4 perc\_ident=100.0 perc\_conserv=100.0 perc\_gaps=0.0  
 query\_cvg=100.0 subj\_cvg=100.0 alpha=59.77 beta=1 prob=0.9981786616795769  
 GTGATCGGATCGTTTTTAATCGATTCTCCGCTTTCAAATTCGCCGGGGGCTGAAGTCGGC  
 CAGAAAGACATGGCTACTTCAGACCATCCCTAA  
 >AA QryID: NC\_002516\_(+)\_384538\_384657 HitID: NC\_017549\_(-)\_6246575\_6246694  
 rank=1 bitscore=43.9 evalue=0.011 perc\_ident=92.31 perc\_conserv=94.87 perc\_gaps=0.0  
 query\_cvg=100.0 subj\_cvg=100.0 alpha=92.31 beta=2 prob=0.9976434215564912  
 GTGCCCGGGGCGGATAACGTCGAGGCGTCATCCGCTCCGGGAGCCGGCTTTCCGCTCC  
 AGGGCGTGCATGGCTTGCGCCGGTTCGCGCCGAAGTGGCGATGCAGGCTCCGTCGCCGTAG  
 >AA QryID: NC\_002516\_(+)\_3147602\_3147733 HitID: NC\_009656\_(-)\_2472960\_2473091  
 rank=1 bitscore=44.7 evalue=0.008 perc\_ident=79.07 perc\_conserv=88.37 perc\_gaps=0.0  
 query\_cvg=100.0 subj\_cvg=100.0 alpha=84.88 beta=2 prob=0.996981992595106  
 TTGATACAGCAGCCCATCGCAGTTCAACGAGGAAACCCGATGAACTCAGCATTGTCGCC  
 CTGGGCCTGTTGTCCATGGCAGGGGTGCTCATCTGCACCTATCTGATCCTGAAATCGCTC  
 AGCGCCATCTGA  
 >AA QryID: NC\_002516\_(+)\_2028103\_2028312 HitID: NC\_017548\_(-)\_3551453\_3551662  
 rank=1 bitscore=46.6 evalue=0.004 perc\_ident=52.17 perc\_conserv=52.17 perc\_gaps=0.0  
 query\_cvg=100.0 subj\_cvg=100.0 alpha=52.17 beta=6 prob=0.9927478370215476  
 ATGGCTTCCGCTCCCGACGCTCTTCCCCAGGCCCTTTCCTCCGACGACGCTCCGGCCCCAG  
 GCCGCGCCGAGCGACGCCAGCGCGTTGCTGAAGGCCGCCCTGGCGAAGAAGAACCAGGCC  
 CAGCTCTATCCGCAGCGGAAGATCCACGACAAGGGCCAGCGTCCCGGCATGGCGCCGCGC  
 GGTACCCGTCGTTTCGATGGGCAAGCGCTGA  
 >AA QryID: NC\_002516\_(+)\_2562140\_2562283 HitID: NC\_011770\_(-)\_3283651\_3283794  
 rank=1 bitscore=40.0 evalue=0.35 perc\_ident=61.7 perc\_conserv=61.7 perc\_gaps=0.0  
 query\_cvg=100.0 subj\_cvg=100.0 alpha=61.7 beta=5 prob=0.9858855104649109  
 ATGACCGAACAATGCAACGCCCCGACCACGAAGCCTCGCGCTGGCCGCGCGACTTCGAT  
 ATCCGCCAGCGCTATGCCGAGCAGCAGGAAGTCTGAGCCACCGCCGCGCGGCCCGCCG  
 GAAGAGCCTACCGCCGACGCCTGA  
 >AA QryID: NC\_002516\_(-)\_1215856\_1216011 HitID: NC\_008463\_(+)\_4433921\_4434076  
 rank=1 bitscore=37.4 evalue=2.4 perc\_ident=66.67 perc\_conserv=66.67 perc\_gaps=0.0  
 query\_cvg=100.0 subj\_cvg=100.0 alpha=66.67 beta=2 prob=0.9820178653152509  
 GTGCTGCCTGGGGAGGTGAACGCCATGAGCAAGGGACTGAACGCGAAGAAGGAACTCGT  
 AGGAAACCGCTGAAAACCGCCCAGGAGAAACGCCTGGCGAAACGAGCGAAAAAACACGCT  
 CCGGCGGCGCCGCTCGGCACCCCATCGCGGAGCTGA  
 >AA QryID: NC\_002516\_(-)\_2591937\_2592074 HitID: NC\_017549\_(-)\_3590224\_3590361  
 rank=1 bitscore=37.4 evalue=2.0 perc\_ident=62.22 perc\_conserv=62.22 perc\_gaps=0.0  
 query\_cvg=100.0 subj\_cvg=100.0 alpha=62.22 beta=1 prob=0.9754033928963171  
 TTGCAGCGTGGTGGTTCCGCCAGCGGCATCGGTGTGGCGCGGCTCGCGGGTTCGGTGGTG  
 CCGGTGGAACCGCTGGAGAGGGAGGGGAAACAGGCGGTAACGACATGCTCGCTGGGCAC  
 CTCTGGCAGTTCGGATAG  
 >AA QryID: NC\_002516\_(-)\_3547362\_3547658 HitID: NC\_008463\_(+)\_2026291\_2026590  
 rank=1 bitscore=47.4 evalue=0.003 perc\_ident=35.96 perc\_conserv=60.67 perc\_gaps=0.0  
 query\_cvg=90.82 subj\_cvg=89.9 alpha=37.46 beta=16 prob=0.8021662375803766  
 ATGCTTTGGGTCAAGCGTACGTTAATGGCGGTGGGGCTGTTAGTTGTCGCCCTTTTCATG  
 ATTGTGGTTGCTTTGGAGAACCGGCAAAGCGTCAGCTTTGAACTCTTTGGTCTTGCCACG  
 CCAGATTTACCTGTGGTCCTTTATGTTGCGTTAGCATTTATTGCTGGCGGTATTATTGGT  
 ATGTTGATCAGCGTGCCTCTTCTGGCTCGTGCCAAAGTGCGTCTCAGATCTGCAAGATCT  
 GATCTGTCTCGTACTCGAAAAGAACTCGCAGTATCTCAGTCTACCGCCCTGCGGTGA

# • *Staphylococcus aureus* MRSA

## vsORFs

>AA QryID: NC\_002952\_(+)\_1155248\_1155337 HitID: NC\_010079\_(+)\_1144638\_1144736  
 rank=1 bitscore=99.0 evalue=2.0E-19 perc\_ident=100.0 perc\_conserv=100.0 perc\_gaps=0.0  
 query\_cvg=100.0 subj\_cvg=90.62 alpha=41.0 beta=1 prob=0.9998780190084814

TTGAAGAAGAAAAGAATTAATAATGATATTTTGGGGCGTATGATTTATAGTAGTAGTATC  
GATAAAAGAAATTTATACAATTTGAAATAA  
>AA QryID: NC\_002952\_(+)\_1161388\_1161465 HitID: NC\_009641\_(+)\_1156561\_1156632  
rank=1 bitscore=75.3 evalue=3.0E-12 perc\_ident=95.65 perc\_conserv=100.0 perc\_gaps=0.0  
query\_cvg=92.0 subj\_cvg=100.0 alpha=56.07 beta=1 prob=0.9997547318364819  
GTGTTGTTGTTTTATCATAATTGCAATATAACAATATTAGTATCAAATTCAGACAAACTA  
TCCAGTCATATTTTATAA  
>AA QryID: NC\_002952\_(-)\_477891\_477953 HitID: NC\_017331\_(-)\_546729\_546791  
rank=1 bitscore=67.2 evalue=5.0E-10 perc\_ident=100.0 perc\_conserv=100.0 perc\_gaps=0.0  
query\_cvg=100.0 subj\_cvg=100.0 alpha=50.39 beta=4 prob=0.9991718627291469  
ATGGCTATTGTAGGTACTATCATTAATAATCATCAAAGCAATTATCGACATTTTCGCAAAA  
TAA  
>AA QryID: NC\_002952\_(-)\_478234\_478299 HitID: NC\_010079\_(-)\_476891\_476956  
rank=1 bitscore=69.4 evalue=1.0E-10 perc\_ident=100.0 perc\_conserv=100.0 perc\_gaps=0.0  
query\_cvg=100.0 subj\_cvg=100.0 alpha=58.53 beta=10 prob=0.9990956616761997  
ATGGGTATCATCGCTGGCATCATTAAGTTATCAAAGCTTAATCGAACAATTCACCTGGT  
AAATAA  
>AA QryID: NC\_002952\_(-)\_478137\_478202 HitID: NC\_016941\_(-)\_448534\_448599  
rank=1 bitscore=69.8 evalue=8.0E-11 perc\_ident=100.0 perc\_conserv=100.0 perc\_gaps=0.0  
query\_cvg=100.0 subj\_cvg=100.0 alpha=65.55 beta=12 prob=0.9988359854312834  
ATGGGTATCATTGCAGGAATCATTAATTCATTAAGGATTAATTGAGAAATTCACCTGGT  
AAGTAA  
>AA QryID: NC\_002952\_(-)\_2597265\_2597324 HitID: NC\_010079\_(-)\_2556381\_2556440  
rank=1 bitscore=62.1 evalue=2.0E-8 perc\_ident=94.74 perc\_conserv=100.0 perc\_gaps=0.0  
query\_cvg=100.0 subj\_cvg=100.0 alpha=37.32 beta=1 prob=0.9979557729951907  
ATGGCGTATAAGGATGAGGGGAAAGAGACTAAATTTGCTGTGAAAGGGTATAAAAACTGA  
>AA QryID: NC\_002952\_(+)\_848945\_849013 HitID: NC\_017337\_(-)\_1181495\_1181617  
rank=1 bitscore=60.4 evalue=8.0E-8 perc\_ident=50.0 perc\_conserv=52.5 perc\_gaps=45.0  
query\_cvg=100.0 subj\_cvg=100.0 alpha=70.45 beta=2 prob=0.9152043997811837  
TTGTCTGTAGAAATTGGGAATCCAATTTCTCTTTGTTGGGGCCCACACCCCACTTGCAT  
TGCCTGTAG

## sORFs

>AA QryID: NC\_002952\_(+)\_1485992\_1486285 HitID: NC\_017342\_(-)\_1899188\_1899481  
rank=1 bitscore=198.0 evalue=1.0E-48 perc\_ident=100.0 perc\_conserv=100.0 perc\_gaps=0.0  
query\_cvg=100.0 subj\_cvg=100.0 alpha=100.0 beta=68 prob=0.999795393128471  
TTGGGAGGTGAATCCACAGAAATGATAAAGAACCCCTGATTATTTGTTTTATAGTCGTT  
CTTGGGAGTGGGACAGAAATGATATTTTCGCAAAATTTATTTTCGTCGTCACCCCACT  
TGCATTGTCTGTAGAAATTGGGAATCCAATTTCTCTTTGTTGGGGCCCCTGACTAGAATT  
GAAAAAAGCTTGTTACAAGCGCATTTTCGTTCACTCACTTAAAAAATTGATTCTATGA  
AAGCATAGAACATTGATTTATGTCCAGCCTCACTTAAAAAATTGATTCTATGA  
>AA QryID: NC\_002952\_(-)\_2550333\_2550530 HitID: NC\_017342\_(+)\_877983\_878171  
rank=1 bitscore=122.0 evalue=7.0E-26 perc\_ident=98.39 perc\_conserv=100.0 perc\_gaps=0.0  
query\_cvg=95.38 subj\_cvg=100.0 alpha=96.12 beta=47 prob=0.9997953929761485  
TTGTCTATATTGGGGAGTGGGACAGAAATGATATTTTCGAAAAATTTATTTTCGTCGTC  
GCCCCGGCAAGGTTGACTAGAATTGAAAAAAGCTTGTTACAAGCGTATTTTCGTTCACT  
AACTACTGCCAATATAACTTCGTAGAGCATGGAACATTGATTTATTTCCCAGGCTCTTTA  
AATAACATTGACCTCTAA  
>AA QryID: NC\_002952\_(+)\_2258969\_2259130 HitID: NC\_017342\_(-)\_1162137\_1162298  
rank=1 bitscore=95.9 evalue=5.0E-18 perc\_ident=100.0 perc\_conserv=100.0 perc\_gaps=0.0  
query\_cvg=100.0 subj\_cvg=100.0 alpha=100.0 beta=53 prob=0.9997953929407764  
TTGACGGGGCCCCAACATAAAGAAATTGGATTCCCAATTTCTACAGACAATGCAAGTTGG  
GGGCGGGGCCCCAACACAAAAGCTGGCGGAAAGTCAGCTTACATTAATGTGCAAGTTGGG  
GTGGGCCCCAACATAAAGAAATACTTTTCTTTAGAAATTAG  
>AA QryID: NC\_002952\_(-)\_1108481\_1108666 HitID: NC\_017342\_(+)\_2262011\_2262196  
rank=1 bitscore=113.0 evalue=3.0E-23 perc\_ident=100.0 perc\_conserv=100.0 perc\_gaps=0.0  
query\_cvg=100.0 subj\_cvg=100.0 alpha=100.0 beta=46 prob=0.9997953928270451  
TTGACTGAACGAAAATGCGCTTGTAACAAGCTTTTTTCAATTCTAGTCAGGGGCCCCAAC  
AAAGAAGCTGACGAAAAGTCAGCTTACAATAATGTGCAAGTTGGGGATGGGCCCCAACAC  
AGAGAATTTCGAAAAGAAATTCTACAGGCAATGCAAGTTGGGGTGGGACGACGAAATAAA

TTTTGA

>AA QryID: NC\_002952\_(-)\_2459136\_2459363 HitID: NC\_017673\_(-)\_2274236\_2274475  
rank=1 bitscore=134.0 evalue=2.0E-29 perc\_ident=96.0 perc\_conserv=98.67 perc\_gaps=0.0  
query\_cvg=100.0 subj\_cvg=94.94 alpha=93.57 beta=45 prob=0.9997953926361236

TTGTTGGGGCCCCCTGACTAGAGTTGAAAAAGCTTGTTGCAAGCGCATTTTCGTTTCAGTC  
AACTACTGCCAATATAATATTATAGACCCTAGGACATTGATTTATGTCCCAAGCTCCAC  
ATCATTGTTACAAATGTACATTATGTAAATGAATATTGCTGTCTAAATGTGCATGTAATA  
TACAATGGTGCAGATAATACACTTAAGTCTTTAAAAATGAAACGTTAG

>AA QryID: NC\_002952\_(-)\_848893\_849096 HitID: NC\_017342\_(+)\_2539118\_2539321  
rank=1 bitscore=129.0 evalue=4.0E-28 perc\_ident=100.0 perc\_conserv=100.0 perc\_gaps=0.0  
query\_cvg=100.0 subj\_cvg=100.0 alpha=100.0 beta=37 prob=0.9997953923778524

TTGACTGAACGAAAATGCGCTTGTAACAAGCTTTTTCAATTCTAGTCAGGGGCCCCAAC  
AAAGAGAATTTTCGAAAAGAAATTCTACAGGCAATGCAAGTTGGGGTGTGGGCCCCAACAA  
AGAGAAATTGGATTCCCAATTTCTACAGACAATGCAAGTTGGGGTGGGACGACGATAAAG  
AAATACTTTTTCTATAGAAATTAG

>AA QryID: NC\_002952\_(+)\_309173\_309382 HitID: NC\_017342\_(-)\_241381\_241590  
rank=1 bitscore=125.0 evalue=9.0E-27 perc\_ident=100.0 perc\_conserv=100.0 perc\_gaps=0.0  
query\_cvg=100.0 subj\_cvg=100.0 alpha=100.0 beta=36 prob=0.9997953920882197

ATGGTAGGCCCTAAAGTGTTATATTGGCGGGCCCCCAACATAGAAGCTGGCGGAAATACA  
GCTTACAATAATGTGCGAGTTGGCAGGCCCCCAACACAGAGAAATTGGAACACCAATTTTC  
AACAGGCAATGCAAGTTGGCGGGGCCCCAACATAGAGAATTTGAAAAGAAATTCTACAG  
GCAATGCAAGTTGGGGAAGGACAGAAATAA

>AA QryID: NC\_002952\_(-)\_862188\_862349 HitID: NC\_017342\_(+)\_2525866\_2526027  
rank=1 bitscore=102.0 evalue=5.0E-20 perc\_ident=100.0 perc\_conserv=100.0 perc\_gaps=0.0  
query\_cvg=100.0 subj\_cvg=100.0 alpha=100.0 beta=32 prob=0.9997953879790339

GTGCAAGTTGGGGTGGGGCCCCAACACAGAGAATTTGAAAAGAAATTCTACAGGCAATG  
CGAGTTGGGGGGTGGGGCCCCAACACAGAAGCTGACTTTCCGCCAGCTTACAATAATGTGC  
AAGTTGGGGCGGGACAACGATAAAGAAATACTTTTTCTATAG

>AA QryID: NC\_002952\_(-)\_446300\_446425 HitID: NC\_016912\_(+)\_810455\_810601  
rank=1 bitscore=71.6 evalue=5.0E-11 perc\_ident=92.5 perc\_conserv=95.0 perc\_gaps=0.0  
query\_cvg=97.56 subj\_cvg=83.33 alpha=90.24 beta=47 prob=0.999795387735996

TTGTTGGGGTCCCTGACTAGAAATTGAAAAAGCTTGTTACAAGTGCATTTTCGTTTCAGTC  
AACTACTGCCAATATAACTTCGTAGAGCATAGAACATTGATTTATGTCCCAGCCTGCTAT  
ATATAA

>AA QryID: NC\_002952\_(-)\_2425158\_2425277 HitID: NC\_017342\_(+)\_1001390\_1001509  
rank=1 bitscore=70.5 evalue=1.0E-10 perc\_ident=100.0 perc\_conserv=100.0 perc\_gaps=0.0  
query\_cvg=100.0 subj\_cvg=100.0 alpha=81.5 beta=53 prob=0.9997953869030467

ATGCCAAATTTAATAGAAATGATCGTTTTAAATATTTTACAAATTGGCGGGGCCCCAAC  
ATAGAAGGTGACGAAAAGTCAGCTTACAATAATGTGCAAGTTGGCGGGGCCCCAACATAG

>AA QryID: NC\_002952\_(-)\_2259140\_2259286 HitID: NC\_017673\_(-)\_2361270\_2361437  
rank=1 bitscore=89.4 evalue=5.0E-16 perc\_ident=91.67 perc\_conserv=93.75 perc\_gaps=0.0  
query\_cvg=100.0 subj\_cvg=87.27 alpha=85.83 beta=48 prob=0.9997953865281508

TTGGGAATACAATTTCTCTTTGTTGGGGCCCCACCGCAAGGTTGACTAGAAATTGAAAAA  
AGCTTGTTACAAGCGCATTTTCGTTTCAGTCAACTACTGCCAATATAACTTCGTAGAGCAT  
AGAACATTGATTTATGTCCAGCCTGA

>AA QryID: NC\_002952\_(+)\_1108470\_1108583 HitID: NC\_016912\_(+)\_1555280\_1555390  
rank=1 bitscore=56.6 evalue=2.0E-6 perc\_ident=97.22 perc\_conserv=100.0 perc\_gaps=0.0  
query\_cvg=97.3 subj\_cvg=100.0 alpha=95.91 beta=33 prob=0.9997953605847414

ATGATATTTTCTCAAAATTTATTTCTGTCGTCACCCCAACTTGCATTGCCTGTAGAATT  
TCTTTTCGAAATTTCTGTGTTGGGGCCCATCCCCAACTTGCACATTATTGTAA

>AA QryID: NC\_002952\_(+)\_552305\_552478 HitID: NC\_017342\_(-)\_12633\_12806  
rank=1 bitscore=103.0 evalue=2.0E-20 perc\_ident=100.0 perc\_conserv=100.0 perc\_gaps=0.0  
query\_cvg=100.0 subj\_cvg=100.0 alpha=100.0 beta=19 prob=0.9997953435702767

TTGACTGAACGAAAAAGCGCTAGTAACAAGCTTTTTCAATTCTAGTCAGGCGCCCCAAC  
ACAGAGAATTTTCGAAAAGAAATTCTACAGGCAATGCGAGTTGGGGTGGGACGACGAAATA  
AATTTTTTGAAAATATCATTCTGTCCCACTCCCATTATGGCACGAATAATTAA

>AA QryID: NC\_002952\_(+)\_2578473\_2578577 HitID: NC\_009487\_(+)\_2574517\_2574621  
rank=1 bitscore=39.3 evalue=0.33 perc\_ident=100.0 perc\_conserv=100.0 perc\_gaps=0.0  
query\_cvg=100.0 subj\_cvg=100.0 alpha=100.0 beta=27 prob=0.9997952448227276

ATGAAATTAGATTTACAGACTGCTCGTCGTAATTTAAATAGCCCTAACATTAAAACAAGA  
AAGCGTGCTTTAAAGATTATTAAGCAACACAAAAGAGCGAAATAA

>AA QryID: NC\_002952\_(+)\_2249533\_2249832 HitID: NC\_017342\_(-)\_1171435\_1171734

rank=1 bitscore=191.0 evalue=2.0E-46 perc\_ident=100.0 perc\_conserv=100.0 perc\_gaps=0.0  
 query\_cvg=100.0 subj\_cvg=100.0 alpha=88.08 beta=1 prob=0.9997951833454506  
 ATGATGTGGCGTTGCGGTGTTATGGGTGGCATAGCCCGTGGTATTGATGCCATGCCGTTA  
 CAATTCTATGATATGTCGTTGGGACGTTGCAATGTGTATTATGCCGTTGTGACGTTATTA  
 TTTCACACTGTTACATGTATTTGTGAATTGCTGTGGAAATGTTGCGACATATACTGCTAC  
 ACTGATGAATCATTGTGTCAAGATGACATTGCAATGAAGAATAGCAACTCTGTTATTAAC  
 CACTTTTTACATGGTGAAATCTCGTTAATATTATTTCAAATAAAAAACAGCAGTAGGATGA  
 >AA QryID: NC\_002952\_(-)\_2425055\_2425210 HitID: NC\_017342\_(+)\_1001539\_1001727  
 rank=1 bitscore=76.3 evalue=4.0E-12 perc\_ident=86.0 perc\_conserv=90.0 perc\_gaps=0.0  
 query\_cvg=98.04 subj\_cvg=80.65 alpha=84.75 beta=32 prob=0.9997951800697111  
 GTGACGAAAAGTCAGCTTACAATAATGTGCAAGTTGGCGGGGCCCAACATAGAGAATTT  
 CAAAAAGAAATTTACAGACAATGCAAGTTGGGGAACAACGAAATAAATTTTATGAAAT  
 ATCATTTCTATCCCCTCTTAAGAATCACTACATAA  
 >AA QryID: NC\_002952\_(-)\_2459344\_2459496 HitID: NC\_009641\_(+)\_1060677\_1060832  
 rank=1 bitscore=72.4 evalue=7.0E-11 perc\_ident=85.11 perc\_conserv=87.23 perc\_gaps=0.0  
 query\_cvg=94.0 subj\_cvg=92.16 alpha=81.2 beta=31 prob=0.9997951502127873  
 TTGGGAATCCAATTTCTCTTTGTTGGGGCCCCGCCAACTTGCAATTGTCTGTAGAAATTGG  
 GAATCCAATTTCTCTTTGTTGGGACCCACACCCCAACTCGCATTGCCTGTAGAATTTCTT  
 TTCGAAATTTCTCTTTGTTGGGGCCCCCTGACTAG  
 >AA QryID: NC\_002952\_(-)\_2105975\_2106148 HitID: NC\_018608\_(-)\_2016727\_2016900  
 rank=1 bitscore=74.7 evalue=1.0E-11 perc\_ident=96.49 perc\_conserv=98.25 perc\_gaps=0.0  
 query\_cvg=100.0 subj\_cvg=100.0 alpha=100.0 beta=14 prob=0.999794948023114  
 TTGAATGTTGTGGCCGTTAATTTTAAATGGTCTTTTCAATTATATATGTTGAAAGTTGAA  
 AATAGAGCGATGAATCGTGTACATAATAATATTTATACTTTAATCATAACGAAAAAGGT  
 AGGAAGAAAACAAAAATTTATACTCAACATCGCAAATATTTCAAGAAAATGTAA  
 >AA QryID: NC\_002952\_(-)\_2720942\_2721109 HitID: NC\_009641\_(-)\_2699302\_2699469  
 rank=1 bitscore=86.3 evalue=4.0E-15 perc\_ident=94.55 perc\_conserv=96.36 perc\_gaps=0.0  
 query\_cvg=100.0 subj\_cvg=100.0 alpha=94.55 beta=16 prob=0.999794911467055  
 GTGAGATACGTTATTTCAATAATAATGGGAATTGTATTAGCAATTTGGTCATTTAAACAA  
 CTGAGTCAAAGTCATTTAGATAGCGGATTTATGTTTTCTTCATAGTTTATGTGTTGTAT  
 ATCAGTTATTTTAAATAGCGATAAGCACGATAAAAAATAAAAAACGATAG  
 >AA QryID: NC\_002952\_(-)\_2858676\_2858822 HitID: NC\_017347\_(-)\_2871022\_2871168  
 rank=1 bitscore=71.2 evalue=1.0E-10 perc\_ident=100.0 perc\_conserv=100.0 perc\_gaps=0.0  
 query\_cvg=100.0 subj\_cvg=100.0 alpha=100.0 beta=12 prob=0.9997947909389737  
 TTGAAAAGTGAATTGAGCAACTCAGGAATAGATGTCACTGTTAAAGATGTTGAAAAGTAT  
 ATGAATCGATATAATGAAGTTATGAAGGGAAAAATGGCGAAAAAGCTAAAAAGTTATGTT  
 TGTCGTTACTACCTATTAATATCATAG  
 >AA QryID: NC\_002952\_(+)\_2002762\_2002950 HitID: NC\_017342\_(-)\_1395727\_1395915  
 rank=1 bitscore=92.0 evalue=9.0E-17 perc\_ident=100.0 perc\_conserv=100.0 perc\_gaps=0.0  
 query\_cvg=100.0 subj\_cvg=100.0 alpha=100.0 beta=5 prob=0.9997944746777108  
 TTGTCATCATTTCAATATCATTCAATAATAGCTAAACCTTCTTCTTCGATTCAAGTTTCAT  
 GAAATAATTCCCGCTGAAAGTATCATGATTTACACATTACTCCACCATTATATAACTTA  
 AAAATGACTATATTTTCATCAACATTATCTAAAGGCGTCGCACCTACACCAACTCCATCC  
 AACAATTAA  
 >AA QryID: NC\_002952\_(+)\_2255218\_2255391 HitID: NC\_018608\_(+)\_2129582\_2129722  
 rank=1 bitscore=54.3 evalue=2.0E-5 perc\_ident=97.83 perc\_conserv=97.83 perc\_gaps=0.0  
 query\_cvg=80.7 subj\_cvg=100.0 alpha=88.39 beta=2 prob=0.9997944415973425  
 GTGATTACAACGGAATCCTCCATAATTTTCAGATATGATTCTATCGAGAATTGTCATGACA  
 GTAAAAATGTTTTTAATTTGCAATTTTTTATGTAATCGTTTTGCAATCTATGTCTATTTT  
 CTATTAGAAAACTACACAAAAAGACGACCTACACAACAGTACTAGTCATGTAA  
 >AA QryID: NC\_002952\_(+)\_2742195\_2742308 HitID: NC\_017341\_(+)\_2744500\_2744613  
 rank=1 bitscore=48.5 evalue=5.0E-4 perc\_ident=100.0 perc\_conserv=100.0 perc\_gaps=0.0  
 query\_cvg=100.0 subj\_cvg=100.0 alpha=100.0 beta=14 prob=0.9997943589326637  
 ATGAAAAATAGTATATCACAAAATTCTGAATTTTTAGATAAAGAAATTGGCAATTTTTCA  
 ATCATATTGTTACAATACACTTTTTATTTTATCTTCATTTTTAAATCCATTAA  
 >AA QryID: NC\_002952\_(-)\_2896396\_2896557 HitID: NC\_018608\_(+)\_818547\_818723  
 rank=1 bitscore=96.3 evalue=4.0E-18 perc\_ident=90.57 perc\_conserv=96.23 perc\_gaps=0.0  
 query\_cvg=100.0 subj\_cvg=91.38 alpha=86.66 beta=17 prob=0.999794275182617  
 TTGACTGAACGAAAATGCGCTTGTAAACAAGCTTTTTTCAATTAAAGTCAGGGGCCCAAC  
 ACAGAGAATTTGAAAAGAAATTCTACAGGCAATGCGAGTTGGGGTGGGACGACGAAATA  
 AATTTTGCGAAAATATCATTTCTGTCCCCTCCCTAATTTGA  
 >AA QryID: NC\_002952\_(-)\_1100299\_1100490 HitID: NC\_018608\_(-)\_1108918\_1109121

rank=1 bitscore=89.0 evalue=8.0E-16 perc\_ident=98.41 perc\_conserv=98.41 perc\_gaps=0.0  
 query\_cvg=100.0 subj\_cvg=94.03 alpha=100.0 beta=5 prob=0.9997942185335835  
 ATGGATAACTTTTCAACTATTTTATTTGCACTAAACTTTGTATACAATTTCAATACTT  
 AATTCACATTACCTGAATCAATCAAATCTAGTTACAAAAAAGTACTATCCATAAACTTC  
 ATTGACCTGTATCTAAGTAAGTTAGAGATATATCTAACTTATAGCGTACACATCAAAATG  
 TTTAATAGATAG  
 >AA QryID: NC\_002952\_(+) 2783143\_2783304 HitID: NC\_017342\_(-) 640802\_640963  
 rank=1 bitscore=62.8 evalue=5.0E-8 perc\_ident=100.0 perc\_conserv=100.0 perc\_gaps=0.0  
 query\_cvg=100.0 subj\_cvg=100.0 alpha=100.0 beta=9 prob=0.9997939640120137  
 TTGGCAATTATTGAATATTTATATAATTTTCTCGTAATAAACAAACTTTAATAGCGCT  
 AAAACAACCTGTGTTAAGTTATGATTTAACGAATTTAACAAATTTTACTAGGATGGCATT  
 AAGAATATTTATACGTTATTAACGAATATTTATTTATTGTAA  
 >AA QryID: NC\_002952\_(+) 2459408\_2459593 HitID: NC\_017342\_(-) 967122\_967343  
 rank=1 bitscore=89.4 evalue=5.0E-16 perc\_ident=77.05 perc\_conserv=83.61 perc\_gaps=1.64  
 query\_cvg=98.36 subj\_cvg=83.56 alpha=70.72 beta=32 prob=0.9997937534311372  
 GTGGGTCCCAACAAAGAGAAATTGGATTCCCAATTTCTACAGACAATGCAAGTTGGCGGG  
 GCCCAACAAAGAGAAATTGGATTCCCAATTTCTACAGACAATGCAAGTTGGCGGGGGCCC  
 CAACAAAGAGAAATTGGATTCCCAATTTCTACAGACAATGCAAGTTGGGTGGGACAACG  
 AAATAA  
 >AA QryID: NC\_002952\_(-) 2650144\_2650299 HitID: NC\_017342\_(+) 777199\_777354  
 rank=1 bitscore=67.8 evalue=1.0E-9 perc\_ident=100.0 perc\_conserv=100.0 perc\_gaps=0.0  
 query\_cvg=100.0 subj\_cvg=100.0 alpha=100.0 beta=7 prob=0.9997937196801765  
 ATGTCTAAAGAACATCTACATTTTATCATATTTTCTGACTTATTAACCTTTTATATAATT  
 AACTATTTCTTAATTTCCAAAATAGTGATAAATTTGTGAAATGCATCACAAACCCCTTT  
 ATTTATTTAGAAATTCATGTAATATTAGACTTGTAA  
 >AA QryID: NC\_002952\_(-) 2787832\_2787945 HitID: NC\_017341\_(-) 2810055\_2810168  
 rank=1 bitscore=58.2 evalue=7.0E-7 perc\_ident=100.0 perc\_conserv=100.0 perc\_gaps=0.0  
 query\_cvg=100.0 subj\_cvg=100.0 alpha=100.0 beta=9 prob=0.9997936794852738  
 ATGGGTGGCTTTGTGAATAGTCTAATAATGAAGGATTTAAGCGATAATGATATGCGTTTT  
 AAATATGAATATTACAATAGAGAAAAAATACGTAGAACAACTTAATAAAATAG  
 >AA QryID: NC\_002952\_(+) 2493206\_2493394 HitID: NC\_009632\_(+) 2495221\_2495409  
 rank=1 bitscore=80.1 evalue=3.0E-13 perc\_ident=100.0 perc\_conserv=100.0 perc\_gaps=0.0  
 query\_cvg=100.0 subj\_cvg=100.0 alpha=100.0 beta=4 prob=0.9997936386212469  
 ATGAACCTTTTCAAACAAAAAGGAATCAACTTACACATCGTTTGTATAATAGTCTTATCT  
 ATAACACTGATGCTATTGATTCTTTTTTATGTTATATATTTTCTTTATTTCAAACGT  
 ATATTAATGATGTCACTTCATTTGATACGATTCTTGATAACCTATTCAAATTCGCCAA  
 ATAACATAA  
 >AA QryID: NC\_002952\_(+) 536115\_536246 HitID: NC\_017347\_(+) 542377\_542508  
 rank=1 bitscore=60.5 evalue=1.0E-7 perc\_ident=100.0 perc\_conserv=100.0 perc\_gaps=0.0  
 query\_cvg=100.0 subj\_cvg=100.0 alpha=100.0 beta=8 prob=0.9997935240770173  
 TTGCGTTTGAATGATGCTCGTATTTTTGAAGTAAGGAAAAAGTTGTTTTTAAATACAA  
 CGAATTAACAAATGCCTTTTATATGTTGAAAGAGTATTGCAGATTAAATTATAAAT  
 GACGAAGTGTA  
 >AA QryID: NC\_002952\_(-) 347415\_347588 HitID: NC\_017337\_(-) 305014\_305187  
 rank=1 bitscore=91.3 evalue=1.0E-16 perc\_ident=100.0 perc\_conserv=100.0 perc\_gaps=0.0  
 query\_cvg=100.0 subj\_cvg=100.0 alpha=100.0 beta=1 prob=0.9997934719966166  
 ATGCACGTACGTCGTGTTGCGCTCTGTAATGTTATACATACACTTATCCTTCATTATACC  
 CGAACTTTTTATATTAAGCAAATTTATGGAAAATGCAATTAATTGTCTATTATTTTG  
 TACGGTACATTTAAATTAAGGATCAATTTAAAAACGCCTACATATACCTTTAA  
 >AA QryID: NC\_002952\_(-) 2791470\_2791730 HitID: NC\_018608\_(-) 2673518\_2673778  
 rank=1 bitscore=141.0 evalue=1.0E-31 perc\_ident=98.84 perc\_conserv=98.84 perc\_gaps=0.0  
 query\_cvg=100.0 subj\_cvg=100.0 alpha=75.81 beta=9 prob=0.9997931122957144  
 ATGATTATAATGAGGGGTTATAACGAAAGATATTGTAGCTGGACTAATACAGCTATACAA  
 TGTGATTATTTTAAATAAGTAAGACAGGTGAAAAAAGACGGTAAATCGGATAGGTTGAGC  
 AACACATAAACTCGAACATTATTTATCGTGTGTTTGAAAAATGTATCACGCTATATAAT  
 GTGTATTCGCGGTGTAAACGTGCACTTATTTTATCAGAACATTCTAAAAAGAACATATTC  
 AATATAAAAAAGGCTGTGTAG  
 >AA QryID: NC\_002952\_(+) 2896419\_2896511 HitID: NC\_017340\_(+) 773775\_773885  
 rank=1 bitscore=53.5 evalue=2.0E-5 perc\_ident=96.67 perc\_conserv=96.67 perc\_gaps=0.0  
 query\_cvg=100.0 subj\_cvg=83.33 alpha=88.61 beta=18 prob=0.9997924909202303  
 ATGATATTTTCGCAAAATTTATTTCTGCTGCTCCCACTCGCATTGCCTGTAGAATT  
 TCTTTTCGAAATTTCTGTGTTGGGGCCCTGA

>AA QryID: NC\_002952\_(+)\_929980\_930090 HitID: NC\_013450\_(+)\_907606\_907713  
 rank=1 bitscore=43.9 evalue=0.015 perc\_ident=100.0 perc\_conserv=100.0 perc\_gaps=0.0  
 query\_cvg=97.22 subj\_cvg=100.0 alpha=100.0 beta=6 prob=0.9997924284774005  
 GTGATGACAACCAATTACTATGTTGAATCTATAAAATTAAAATTGAATTCATTATGAAT  
 ATCGATATAATGAATTGTAAAAACAAATTTTAAAACGTATTTTATATTGA  
 >AA QryID: NC\_002952\_(-)\_2736938\_2737084 HitID: NC\_018608\_(-)\_2618798\_2618944  
 rank=1 bitscore=80.9 evalue=2.0E-13 perc\_ident=93.75 perc\_conserv=95.83 perc\_gaps=0.0  
 query\_cvg=100.0 subj\_cvg=100.0 alpha=97.92 beta=4 prob=0.9997921685147195  
 ATGTTAACGGTGCAGAAAAAGTGTGTAAACATTCTAATTGGTATATTACATTCAATGAT  
 GCTTTGTTAGGAACAGATTACATTATGATAACAAAGACCACAAGGTACCTAATCTCTGTT  
 ATAGTTTGTGTTTGTGCGCAAAACTATAA  
 >AA QryID: NC\_002952\_(-)\_2173430\_2173618 HitID: NC\_017342\_(+)\_1249818\_1250006  
 rank=1 bitscore=103.0 evalue=3.0E-20 perc\_ident=100.0 perc\_conserv=100.0 perc\_gaps=0.0  
 query\_cvg=100.0 subj\_cvg=100.0 alpha=68.0 beta=21 prob=0.9997918771936329  
 ATGCAAGTTGGCGGGGCCCAACACAGAGAATTTGCGAAAAGAAATTCTACAAACAATGTA  
 AGTTGGGGTGGGGCCCCAACAAAGAGAAATTGGATTCCCAATTTCAACAGACAATGCAAT  
 TTAAGTATGACAAATCAACGCTATAGTTTCAGTTTACATCACCTATTCAATGGAAATAT  
 GCTTGTTGA  
 >AA QryID: NC\_002952\_(+)\_1371966\_1372094 HitID: NC\_017341\_(+)\_1357160\_1357282  
 rank=1 bitscore=57.4 evalue=1.0E-6 perc\_ident=97.22 perc\_conserv=97.22 perc\_gaps=0.0  
 query\_cvg=85.71 subj\_cvg=90.0 alpha=85.42 beta=2 prob=0.9997916679520433  
 GTGAAGGTTATTTTTATTGTCCAAAACGTGCTGATGACATTTTAAAAGCAAGTATGGAA  
 TATCAGTCGACAGACTATAAACGGAGGTATATCTCATGGAAAAAATGAAAGTAATATTA  
 CTGATGTAA  
 >AA QryID: NC\_002952\_(-)\_283057\_283191 HitID: NC\_017337\_(-)\_231665\_231799  
 rank=1 bitscore=66.2 evalue=5.0E-9 perc\_ident=97.73 perc\_conserv=97.73 perc\_gaps=0.0  
 query\_cvg=100.0 subj\_cvg=100.0 alpha=97.73 beta=5 prob=0.9997914006565752  
 TTGTCACGATACTTTCCGATTGTGATTACATTTGACGTTACAGTCATTTCAACGACAACC  
 CTTGCTACATTGCAATCCCTTTGAATTACAGTCACTGCGTTTCTATGTCATCTAC  
 AATCATTTGTCGTGA  
 >AA QryID: NC\_002952\_(-)\_1110744\_1110866 HitID: NC\_018608\_(-)\_1119365\_1119487  
 rank=1 bitscore=54.7 evalue=7.0E-6 perc\_ident=100.0 perc\_conserv=100.0 perc\_gaps=0.0  
 query\_cvg=100.0 subj\_cvg=100.0 alpha=100.0 beta=5 prob=0.9997913892777199  
 ATGAACGACATGATGAACCTAGTTATTAACCAAATCGTTATTAAGTTACATTATAGAGAT  
 GATTGGAATGAATTTATCGATATATACTCCAATACGATTTTACTAGGGTTAACAATAAAT  
 TAA  
 >AA QryID: NC\_002952\_(-)\_1652225\_1652359 HitID: NC\_017351\_(-)\_1619192\_1619326  
 rank=1 bitscore=56.6 evalue=3.0E-6 perc\_ident=97.73 perc\_conserv=100.0 perc\_gaps=0.0  
 query\_cvg=100.0 subj\_cvg=100.0 alpha=100.0 beta=5 prob=0.9997911902739828  
 ATGTTTAATGTGATACTTATTAATGATAAGTATAACGTAATTATCAAAATTTATATAGTT  
 ATGTCTACGTTAAAGTTAGAAAAATTAAGTAGCAAAGACGAATTTTAAACAGATTTTGAT  
 TCAAGTATAAATTAA  
 >AA QryID: NC\_002952\_(-)\_2070307\_2070417 HitID: NC\_010079\_(-)\_2032466\_2032576  
 rank=1 bitscore=56.6 evalue=2.0E-6 perc\_ident=100.0 perc\_conserv=100.0 perc\_gaps=0.0  
 query\_cvg=100.0 subj\_cvg=100.0 alpha=100.0 beta=4 prob=0.9997909565204375  
 TTGGATGGAACAACCAAAATTGATGTGTGTTTTTTGTTCTAGTGAATAATTATTATACA  
 ATGAGTATCTATCTAGAATTATCAATAGTAATGGTGATTATGCAACATGA  
 >AA QryID: NC\_002952\_(-)\_2792112\_2792225 HitID: NC\_018608\_(-)\_2674160\_2674273  
 rank=1 bitscore=60.8 evalue=1.0E-7 perc\_ident=100.0 perc\_conserv=100.0 perc\_gaps=0.0  
 query\_cvg=100.0 subj\_cvg=100.0 alpha=100.0 beta=3 prob=0.9997909037534987  
 ATGAATGGCATACTTATAAAGTGTCTAAATATTGGTGGTCAATATTACTTGCAAATACGA  
 ATGTTAAGTAATGAAGACAATGCTGAAAAACAATAAGTGGAAACTCTATATAG  
 >AA QryID: NC\_002952\_(+)\_626241\_626393 HitID: NC\_017342\_(-)\_2732989\_2733141  
 rank=1 bitscore=63.5 evalue=3.0E-8 perc\_ident=100.0 perc\_conserv=100.0 perc\_gaps=0.0  
 query\_cvg=100.0 subj\_cvg=100.0 alpha=100.0 beta=2 prob=0.9997905731660783  
 GTGTTTATTTATAAAACAACAAATTTTATATTATAATGGTAGTAGTTATTCAGTCAAA  
 TACTACCAATATATCATTGTAGAGCTTAGGATATTGATTTATGACTCAGGCACATCAAAT  
 GAGAAGATTTATAAAAGAGATATACAACCTAG  
 >AA QryID: NC\_002952\_(-)\_2412135\_2412230 HitID: NC\_017673\_(-)\_2226865\_2226960  
 rank=1 bitscore=50.4 evalue=1.0E-4 perc\_ident=100.0 perc\_conserv=100.0 perc\_gaps=0.0  
 query\_cvg=100.0 subj\_cvg=100.0 alpha=100.0 beta=4 prob=0.9997897258389978  
 GTGATATTAACATGTTACAATACATTTAACACATCATTTGCAATCATTGAATTTAAATCA

AAGATTAGTGGGAATAGATGAAGCACGTTTCGAAATAA

>AA QryID: NC\_002952\_(+)\_2691200\_2691361 HitID: NC\_017342\_(-)\_732465\_732626  
rank=1 bitscore=63.5 evalue=3.0E-8 perc\_ident=100.0 perc\_conserv=100.0 perc\_gaps=0.0  
query\_cvg=100.0 subj\_cvg=100.0 alpha=100.0 beta=1 prob=0.9997896359836693  
ATGCCAATAGGTATACATTTGCGTGGAAGAAAAGTATTCAAAATCATGAATTGTTTTATT  
TTGTATATCTGTATCAAAATCGATTTGATTAAAATCCGCTTTATTTTATCATCTATTCAA  
ATGATTTTAGTGCGCTTATTTTACTATGGCATTATTGCCTAA

>AA QryID: NC\_002952\_(-)\_1894365\_1894478 HitID: NC\_018608\_(-)\_1829593\_1829706  
rank=1 bitscore=45.4 evalue=0.004 perc\_ident=100.0 perc\_conserv=100.0 perc\_gaps=0.0  
query\_cvg=100.0 subj\_cvg=100.0 alpha=100.0 beta=5 prob=0.9997896126722201  
ATGAAAAAAGTTTATATAAAATTAATAATATATCGTTTCGTTATCATTTAGCGTTTGTTTTT  
ATTTTCAGGCTTTTCGCTAAATTTTCCAAACAAAAATATGTTACTGTAAATTAA

>AA QryID: NC\_002952\_(-)\_1422290\_1422388 HitID: NC\_017673\_(-)\_1294921\_1295019  
rank=1 bitscore=49.3 evalue=3.0E-4 perc\_ident=100.0 perc\_conserv=100.0 perc\_gaps=0.0  
query\_cvg=100.0 subj\_cvg=100.0 alpha=100.0 beta=4 prob=0.9997894742277276  
ATGAATCATGCACCTTCTATAAAATTAGACCGAATTGAAACTTCAGTAAATATAGAGATA  
CATCATCATTTCTTATACAATAACAAGAGATTTATATTAG

>AA QryID: NC\_002952\_(-)\_1458671\_1458778 HitID: NC\_010079\_(-)\_1425155\_1425262  
rank=1 bitscore=57.4 evalue=1.0E-6 perc\_ident=100.0 perc\_conserv=100.0 perc\_gaps=0.0  
query\_cvg=100.0 subj\_cvg=100.0 alpha=100.0 beta=2 prob=0.9997892603525294  
TTGAAACATGATTTTGTGTTGAATCATTATTAGAGTGCAAAGCTTGATTTATCGAGAC  
GCTGATTTTGACATTCAGTTAGTCTACAAGCTTATCAACTTAAAATAG

>AA QryID: NC\_002952\_(-)\_819031\_819279 HitID: NC\_017342\_(+)\_2568934\_2569182  
rank=1 bitscore=108.0 evalue=1.0E-21 perc\_ident=100.0 perc\_conserv=100.0 perc\_gaps=0.0  
query\_cvg=100.0 subj\_cvg=100.0 alpha=83.49 beta=4 prob=0.9997890719431659  
TTGATTTTCTAACTTATTGGTGTGTTTTTCATTTAGCATACATAATAGGTTACATTAA  
ATAACATTTTATACCAAAGTACACCAAAGAATATTAGTACACGAATTAACAACATTTT  
TATAGAAACCTATTGCACTTTAACGTCAATAAGTATATTTTTATATTATCTCTAATTAAT  
TGTGCGCGCTTAATAACAGAATATTCTCAATATTTTTATTTTTTTGTGATTTGTGAAATA  
TTTAGTTGA

>AA QryID: NC\_002952\_(+)\_2350488\_2350613 HitID: NC\_017342\_(-)\_1074496\_1074621  
rank=1 bitscore=47.0 evalue=0.002 perc\_ident=100.0 perc\_conserv=100.0 perc\_gaps=0.0  
query\_cvg=100.0 subj\_cvg=100.0 alpha=100.0 beta=4 prob=0.9997889114242122  
ATGTATCATGGCTATATCATCTTTGAATTAATACAATTGACACCATTTAGCATGACCGTT  
ATCTCTTTAATTCAGCTGATATTACCTATTGCAGTTTTATGTGACGAAGTGTGCACTTA  
ATTTGA

>AA QryID: NC\_002952\_(-)\_919123\_919329 HitID: NC\_017342\_(+)\_2452731\_2452937  
rank=1 bitscore=112.0 evalue=9.0E-23 perc\_ident=100.0 perc\_conserv=100.0 perc\_gaps=0.0  
query\_cvg=100.0 subj\_cvg=100.0 alpha=80.96 beta=5 prob=0.9997888816837908  
ATGCCACAATCATGTTGTATTTATGTTGTCGCTTTATCTAGCATCAATGATTATTTTTTA  
CACCAATCAAAAAATCGGACTGATATAAATAAGTACAAAGCTTATCTATCAATCCGATTT  
AGTTATAAAACAAAAAAGCCACAGTAATGTGGCTTTTTGTTATATTCAATCAAAAATG  
GTATCAATAACCGTTTTTCGACAGTTAA

>AA QryID: NC\_002952\_(+)\_1972908\_1973009 HitID: NC\_017337\_(+)\_1884513\_1884614  
rank=1 bitscore=50.1 evalue=2.0E-4 perc\_ident=100.0 perc\_conserv=100.0 perc\_gaps=0.0  
query\_cvg=100.0 subj\_cvg=100.0 alpha=100.0 beta=3 prob=0.9997885431126907  
ATGCAAGGTTTTAAAGAGAAACATCAAGAACTAAAGAGTGCTCTATGCCAAATTGGACTG  
ATGCGTTCAATATCGGAAGTTAGGCAACTAAACATTGCTTAA

>AA QryID: NC\_002952\_(+)\_1366178\_1366312 HitID: NC\_017342\_(-)\_2017591\_2017725  
rank=1 bitscore=56.6 evalue=3.0E-6 perc\_ident=100.0 perc\_conserv=100.0 perc\_gaps=0.0  
query\_cvg=100.0 subj\_cvg=100.0 alpha=100.0 beta=1 prob=0.9997878325513244  
ATGATTTTTAAAATTAATAGATTTGAAAAGTATACTTTATTTTCATGAAAGTTTTTGGTAC  
ATTTATTTGAAAATGTTTTATTACAAAGTTACATGCCTAAATGTTTCTTAACAAAATTA  
ATTCATCAAGTGTA

>AA QryID: NC\_002952\_(+)\_1022057\_1022173 HitID: NC\_018608\_(+)\_1034982\_1035098  
rank=1 bitscore=52.0 evalue=5.0E-5 perc\_ident=100.0 perc\_conserv=100.0 perc\_gaps=0.0  
query\_cvg=100.0 subj\_cvg=100.0 alpha=100.0 beta=2 prob=0.9997878024679929  
ATGTATATGATTTTGATAAATACATGCTTTTTACGTAAATCAAGTTTGATACAGAAAGGA  
CTAAATCAAACATTTATCGTTGTAATACGTTTAAATAACTTTATTAATAAAGTCATAA

>AA QryID: NC\_002952\_(+)\_2780472\_2780567 HitID: NC\_007795\_(+)\_2701454\_2701549  
rank=1 bitscore=36.6 evalue=2.2 perc\_ident=100.0 perc\_conserv=100.0 perc\_gaps=0.0  
query\_cvg=100.0 subj\_cvg=100.0 alpha=100.0 beta=5 prob=0.9997872102197229



ATGAAAAATGTGTCAATTTACAAAACAACTCAAGAATTAAGTTTTGTAAGTTCGTTAGAT  
 TTTTATTTAACGAAACATTTAACTTTAATGCTTTAA  
 >AA QryID: NC\_002952\_(-)\_2173344\_2173448 HitID: NC\_010079\_(-)\_2133177\_2133275  
 rank=1 bitscore=50.8 eval=1.0E-4 perc\_ident=96.88 perc\_cons=100.0 perc\_gaps=0.0  
 query\_cvg=94.12 subj\_cvg=100.0 alpha=94.03 beta=1 prob=0.9997870476584082  
 ATGGAAATATGCTTGTTGATATTGAATATTACATTCAAACAATATTCATCGCTATTTCT  
 TATCAACTTAAAATTCGCAATAAAAAAACTGCCAGCACGCGAATAG  
 >AA QryID: NC\_002952\_(+)\_2201756\_2201911 HitID: NC\_018608\_(+)\_2075566\_2075721  
 rank=1 bitscore=56.6 eval=4.0E-6 perc\_ident=96.08 perc\_cons=98.04 perc\_gaps=0.0  
 query\_cvg=100.0 subj\_cvg=100.0 alpha=98.04 beta=3 prob=0.9997866876719725  
 ATGATTATCCATTGTTCAATCGTATCTAACTTTATATTTAACCTTTATATTGTAACAAAT  
 TTCAACTTAAATTTCTTATCTTTGAAACAGATTATCTCTTCAAAGTTAATTGTAAGAAAA  
 TTTAAATATTTGTTGACATGCTAAAGCAGATATAG  
 >AA QryID: NC\_002952\_(-)\_2073423\_2073515 HitID: NC\_018608\_(-)\_1984300\_1984392  
 rank=1 bitscore=34.3 eval=9.9 perc\_ident=100.0 perc\_cons=100.0 perc\_gaps=0.0  
 query\_cvg=100.0 subj\_cvg=100.0 alpha=100.0 beta=5 prob=0.9997864319274574  
 ATGACTAAAAATACAATAATTAGCCTTGAAAATGAAAAACGCAGATCAATGATTCAGAA  
 AATGAATCTAGTGATCTCCGTAAAGCAAATAA  
 >AA QryID: NC\_002952\_(+)\_1366514\_1366624 HitID: NC\_002951\_(+)\_1350726\_1350836  
 rank=1 bitscore=38.9 eval=0.42 perc\_ident=97.22 perc\_cons=100.0 perc\_gaps=0.0  
 query\_cvg=100.0 subj\_cvg=100.0 alpha=97.22 beta=7 prob=0.9997862900651331  
 ATGAAGATACTATTAAGTGCGAAAAACAAATAAAAAAGAGAAAATAGAATTTTTAATA  
 GGGACGTTTATAATTATTTAGTAATATTAGGGTTCAAATTATGAAATAA  
 >AA QryID: NC\_002952\_(+)\_1654007\_1654138 HitID: NC\_016928\_(+)\_1592197\_1592328  
 rank=1 bitscore=54.3 eval=9.0E-6 perc\_ident=97.67 perc\_cons=97.67 perc\_gaps=0.0  
 query\_cvg=100.0 subj\_cvg=100.0 alpha=97.67 beta=3 prob=0.999786170313621  
 ATGACAAGGATTGATTACGAATCAAGTATATCAATTGTTCTATCATTCGCTTTTTTTCTA  
 GACTATATTATGAAATTATATTTACAATGCCCAAACCTATTTTAATAATCATTGAACAA  
 ATGGGTGTATAA  
 >AA QryID: NC\_002952\_(+)\_2451108\_2451224 HitID: NC\_018608\_(+)\_2333472\_2333588  
 rank=1 bitscore=42.0 eval=0.045 perc\_ident=100.0 perc\_cons=100.0 perc\_gaps=0.0  
 query\_cvg=100.0 subj\_cvg=100.0 alpha=100.0 beta=3 prob=0.9997859602709354  
 ATGCAAATTTCTATACTTTTACAATTCTATTGTGTCAAGATATTAGCAAAAAATTACAAA  
 ACGTTAACAAAGCACACAAGGACGCTAATTTCTGTTATAGTCTTTCTTGTCGTTTAA  
 >AA QryID: NC\_002952\_(+)\_1047434\_1047535 HitID: NC\_007795\_(+)\_942903\_943004  
 rank=1 bitscore=50.8 eval=1.0E-4 perc\_ident=100.0 perc\_cons=100.0 perc\_gaps=0.0  
 query\_cvg=100.0 subj\_cvg=100.0 alpha=100.0 beta=1 prob=0.9997858858952912  
 TTGAAATTTGCAGCAAATAAATTAACCTTGACTATTTTCAGAAAATTCTGTATAAATAAC  
 GAAAAAGAGATATGGATTAAATATGAAGAGGTGTTTTATAG  
 >AA QryID: NC\_002952\_(-)\_2581109\_2581213 HitID: NC\_007795\_(-)\_2487184\_2487288  
 rank=1 bitscore=43.1 eval=0.022 perc\_ident=97.06 perc\_cons=100.0 perc\_gaps=0.0  
 query\_cvg=100.0 subj\_cvg=100.0 alpha=97.06 beta=6 prob=0.9997858841647156  
 ATGTTAACTAATAGATTAAGTGTAACTATGTAAAAAAGCGTTTAATTCAGAACATT  
 CAGCGTATTTTAAGTAAGAAAGTACTATATGGAGAAATGCAATAG  
 >AA QryID: NC\_002952\_(-)\_477335\_477478 HitID: NC\_010079\_(-)\_475992\_476135  
 rank=1 bitscore=78.2 eval=1.0E-12 perc\_ident=93.62 perc\_cons=93.62 perc\_gaps=0.0  
 query\_cvg=100.0 subj\_cvg=100.0 alpha=93.62 beta=2 prob=0.9997858030659954  
 TTGTACTTTCAATTAACAGTTGGTACGATGGTTTTGTCAATTTTCATCAACGCAAATATA  
 AAAAGGACTAAGACACATACATGTCCTAGCCCTATGGATAAAATGCAAATTTCTGCTTTA  
 TCAAACTATCACACTTTAGATAG  
 >AA QryID: NC\_002952\_(-)\_2337472\_2337639 HitID: NC\_017342\_(+)\_1087469\_1087636  
 rank=1 bitscore=58.5 eval=1.0E-6 perc\_ident=96.36 perc\_cons=98.18 perc\_gaps=0.0  
 query\_cvg=100.0 subj\_cvg=100.0 alpha=96.36 beta=3 prob=0.9997852550890461  
 TTGAAAAAAGAAGCGACTTGCAAACACGAATGTTTTCAAAAAAGTTATTGACTTTAAAT  
 TATAAAGTTGATAAGATAATAAAGTCGTCAAAAACGGTGATGATGTTTTAAAGAAGAAT  
 TTCAAAAGTGTAACCTTACCATTGAAATAACTATAAAAAACAATATAA  
 >AA QryID: NC\_002952\_(-)\_1195890\_1195994 HitID: NC\_010079\_(-)\_1184072\_1184176  
 rank=1 bitscore=48.5 eval=5.0E-4 perc\_ident=100.0 perc\_cons=100.0 perc\_gaps=0.0  
 query\_cvg=100.0 subj\_cvg=100.0 alpha=100.0 beta=1 prob=0.9997849815672124  
 TTGACAATTTTACGGCTTGAAAATCAATTTAATCATGGAAAATTTATAATATTCATTGTT  
 TTACATTTTCAAATCAATGAAAAACACAAGTGGTTTAATGTATAA  
 >AA QryID: NC\_002952\_(-)\_673600\_673719 HitID: NC\_002951\_(-)\_700498\_700617

rank=1 bitscore=49.3 evalue=3.0E-4 perc\_ident=94.87 perc\_conserv=97.44 perc\_gaps=0.0  
 query\_cvg=100.0 subj\_cvg=100.0 alpha=97.44 beta=4 prob=0.9997840663762636  
 ATGCTGATCTTTTTGACTAATCCAAATGCTAACCCAGAAATACAATCACTGTGTCTAATA  
 AATAATTTGTTTTATAAACACTTTTTTTGTTTACTTCTCATTTTTTAATTAGTTATAATTA  
 >AA QryID: NC\_002952\_(-)\_2776211\_2776378 HitID: NC\_017342\_(+)\_647728\_647895  
 rank=1 bitscore=103.0 evalue=2.0E-20 perc\_ident=100.0 perc\_conserv=100.0 perc\_gaps=0.0  
 query\_cvg=100.0 subj\_cvg=100.0 alpha=79.55 beta=5 prob=0.9997840033552671  
 ATGTTAAATAATGATCATGGAATTGAAGACACAAAAATAATGGGCGACGCCTGTCCCAT  
 TTGTATGGAATATTAATACTTTTTACAAAGCCTTATCTTTTAAAAAGAAGTCAAACATATG  
 ATTGTAATTAATAAATACGGGAATGAATTAGTAATAGATATAAAGTAA  
 >AA QryID: NC\_002952\_(-)\_1945710\_1945805 HitID: NC\_017673\_(-)\_1757254\_1757349  
 rank=1 bitscore=46.2 evalue=0.003 perc\_ident=100.0 perc\_conserv=100.0 perc\_gaps=0.0  
 query\_cvg=100.0 subj\_cvg=100.0 alpha=100.0 beta=1 prob=0.9997839911390997  
 ATGAACATCTTTAAAACGAATCATAATTATGATGAAGTAATGAAGTATGACAATGGTGAA  
 TTCATAAAATATGGCAAATTGTTAAAAATATTTTAA  
 >AA QryID: NC\_002952\_(-)\_886239\_886334 HitID: NC\_018608\_(-)\_889091\_889186  
 rank=1 bitscore=41.2 evalue=0.089 perc\_ident=100.0 perc\_conserv=100.0 perc\_gaps=0.0  
 query\_cvg=100.0 subj\_cvg=100.0 alpha=100.0 beta=2 prob=0.9997837633715105  
 TTGCAACAATACATAGAATCATTATTACAAGAATTATTTAATATCATCTTAGAATCTCAC  
 AAAATATCAACTTTGTTTAATTACTCAAAACGATAA  
 >AA QryID: NC\_002952\_(+)\_1916941\_1917036 HitID: NC\_018608\_(+)\_1845736\_1845831  
 rank=1 bitscore=40.0 evalue=0.16 perc\_ident=100.0 perc\_conserv=100.0 perc\_gaps=0.0  
 query\_cvg=100.0 subj\_cvg=100.0 alpha=100.0 beta=2 prob=0.9997831986648495  
 ATGATGCACATCATATTTGTAACATAGAAAATTTTATAATTTTATCATTATATTTCA  
 ACTGAAAATGAGAAACAAAATGGCACTTTTTACTAA  
 >AA QryID: NC\_002952\_(-)\_2370417\_2370533 HitID: NC\_002951\_(-)\_2268888\_2269004  
 rank=1 bitscore=53.1 evalue=2.0E-5 perc\_ident=97.37 perc\_conserv=100.0 perc\_gaps=0.0  
 query\_cvg=100.0 subj\_cvg=100.0 alpha=97.37 beta=2 prob=0.9997831308895817  
 TTGTTTGTATGTTTATAATTTAAACGTAATCAAATTGAAAGCCTTTTCTCAAGATTTT  
 CATAACCTACAAATAAATATGTCATATTTAAGAAAGGTATTTCAAATTTAAAGTAA  
 >AA QryID: NC\_002952\_(+)\_275285\_275392 HitID: NC\_010079\_(+)\_282404\_282511  
 rank=1 bitscore=52.0 evalue=5.0E-5 perc\_ident=97.14 perc\_conserv=97.14 perc\_gaps=0.0  
 query\_cvg=100.0 subj\_cvg=100.0 alpha=97.14 beta=2 prob=0.9997819865548172  
 TTGTCTGTTTGTACACCGACGATTGCGCGCATTTATTTGACTAATTCAAAAACATTGTT  
 GTTTTCTTAGAAAAAAGTAAACATGATAATAAAATGTGAAAGTGTA  
 >AA QryID: NC\_002952\_(-)\_2810814\_2810981 HitID: NC\_017342\_(+)\_614031\_614189  
 rank=1 bitscore=89.4 evalue=5.0E-16 perc\_ident=100.0 perc\_conserv=100.0 perc\_gaps=0.0  
 query\_cvg=94.55 subj\_cvg=100.0 alpha=77.08 beta=3 prob=0.9997818666425171  
 ATGTATCAAATGAATAATAAAATTTGTTTTGTATCACGTGTACACAAGTTAGTTACTAC  
 ATATTAACCTTGTTGACGCGTTTTTTATGGAAAGAAAGAATTCATAGTCATTCATTTGAC  
 TGTATAAAAAACTTTATACAACATGTTTTGTGGGTGTTTTGAATAA  
 >AA QryID: NC\_002952\_(-)\_2628166\_2628264 HitID: NC\_018608\_(-)\_2505714\_2505812  
 rank=1 bitscore=48.5 evalue=5.0E-4 perc\_ident=96.88 perc\_conserv=96.88 perc\_gaps=0.0  
 query\_cvg=100.0 subj\_cvg=100.0 alpha=96.88 beta=3 prob=0.9997818215169189  
 ATGAAAGCAGCGGATTTTAGCGTTACTGCAATAATTTTATATTAGTAGTGGATGTTGGT  
 CACACAAGAATTTCAAATATTAAAGCCCTCAGAATATGA  
 >AA QryID: NC\_002952\_(-)\_1716696\_1716815 HitID: NC\_017333\_(-)\_1719732\_1719851  
 rank=1 bitscore=53.5 evalue=2.0E-5 perc\_ident=97.44 perc\_conserv=97.44 perc\_gaps=0.0  
 query\_cvg=100.0 subj\_cvg=100.0 alpha=97.44 beta=1 prob=0.9997811739744018  
 TTGAAAACAAGCACTATCGTAATGGTAGTTGCTTGTTTTTTACGTTAAGAAAAATTGAA  
 AATCAAAGAGAATCTTTGAGAAATATGAGTTGTTTAAATTACAACAAAAAATTGATTAG  
 >AA QryID: NC\_002952\_(-)\_1580225\_1580416 HitID: NC\_017342\_(+)\_1806014\_1806205  
 rank=1 bitscore=99.4 evalue=5.0E-19 perc\_ident=100.0 perc\_conserv=100.0 perc\_gaps=0.0  
 query\_cvg=100.0 subj\_cvg=100.0 alpha=75.85 beta=7 prob=0.9997796886441153  
 ATGAGTGTTACAAATCTAAGAATTGCAAAAGAAGCTGATTTAGTCACAAAAAATGTCCTA  
 TGTAATAATTCGAGAAAGATGCACTATATACGGTCTTCTTACTATTCAAATGTAAAAGTT  
 GCTTATTTGCGTGGCTTTTTGTTTTATAAAAGTATAAAATTTTACTATAATATATCTTGT  
 AGAGAACAATGA  
 >AA QryID: NC\_002952\_(-)\_1230842\_1230973 HitID: NC\_017673\_(-)\_1124771\_1124902  
 rank=1 bitscore=44.7 evalue=0.008 perc\_ident=90.7 perc\_conserv=95.35 perc\_gaps=0.0  
 query\_cvg=100.0 subj\_cvg=100.0 alpha=90.7 beta=9 prob=0.9997768299423784  
 GTGTTTATTTTAAATTTGATGCGTTCATTGAAACGAAGTATCGTGTTTTTAAATAACGTA

TCATCATTTAAGTTAAAAATTATCTTTGTGATTTTAAAAATGAGTGAAACTAAAATGATA  
ATGTGTA CTAA

>AA QryID: NC\_002952\_(+)\_215875\_216015 HitID: NC\_017342\_(-)\_335984\_336124  
rank=1 bitscore=86.7 eval=3.0E-15 perc\_ident=100.0 perc\_cons=100.0 perc\_gaps=0.0  
query\_cvg=100.0 subj\_cvg=100.0 alpha=78.02 beta=7 prob=0.9997764335464547  
ATGAGTATGAAGGGGGATTAAATTGATGATTTTAAAAATTCAAATTTAAGGGGAGAGCGA  
ACTATCAATGATGCTGCAAAACACAATCGCAATGAAAAACAGGCGCGTCACCTTATGAA  
GGTATACGCACCTGTTTATAG

>AA QryID: NC\_002952\_(+)\_2424930\_2425100 HitID: NC\_018608\_(+)\_2307282\_2307452  
rank=1 bitscore=99.0 eval=7.0E-19 perc\_ident=100.0 perc\_cons=100.0 perc\_gaps=0.0  
query\_cvg=100.0 subj\_cvg=100.0 alpha=77.11 beta=5 prob=0.9997764138182417  
TTGTTTAGATTTATCTTTTGACAACCTTGTGTTTATTTCGACAACATTTATACCTAAA  
AAAGATATATTACAACTCAATGACTTGGAGTGTGACAACAATGTAAAGAGCCACTAAAG  
ATTTATTATGTAGTGATTCTTAAGAGTGGGATAGAAATGATATTTTCATAA

>AA QryID: NC\_002952\_(-)\_2384905\_2385084 HitID: NC\_017337\_(-)\_2317222\_2317401  
rank=1 bitscore=97.4 eval=2.0E-18 perc\_ident=100.0 perc\_cons=100.0 perc\_gaps=0.0  
query\_cvg=100.0 subj\_cvg=100.0 alpha=77.01 beta=5 prob=0.9997748804077384  
TTGACAGAGATTGTAGAATTTCTGTCAGATGGTAAGTTAGCAAGTAGGCTAGAAATTCAA  
GAAACAATGGGACTTCAAAAAAGTTATACATCTGAGTTAATTGCTGAACTAAAGAAATTA  
GAGATTATCGGATCTGAAGGTAGAGGTCCGGGAAGTAGATATTATTTAATTAGAGACTAA

>AA QryID: NC\_002952\_(+)\_2701148\_2701249 HitID: NC\_010079\_(+)\_2672107\_2672208  
rank=1 bitscore=45.1 eval=0.006 perc\_ident=96.97 perc\_cons=96.97 perc\_gaps=0.0  
query\_cvg=100.0 subj\_cvg=100.0 alpha=96.97 beta=1 prob=0.9997736321384169  
ATGATAAAAAATACAAGCAATTGAACTTTATTACGGAAAATCAAACCTTTTCAATGACGCTA  
TTAATTTGGCTAGTCGCGAAGATGCATTTTCTAAAATGTGA

>AA QryID: NC\_002952\_(+)\_2302458\_2302556 HitID: NC\_010079\_(+)\_2263846\_2263944  
rank=1 bitscore=39.3 eval=0.35 perc\_ident=96.88 perc\_cons=96.88 perc\_gaps=0.0  
query\_cvg=100.0 subj\_cvg=100.0 alpha=96.88 beta=2 prob=0.999772069889407  
ATGGCGACTTATTTGGTCTTTGATGATGCAATGTTTATTAACAAATTTCAACTATTATT  
TCTTACATTAGTCATATTTTTGACAATTTACTATTATAA

>AA QryID: NC\_002952\_(+)\_847372\_847470 HitID: NC\_002951\_(+)\_841589\_841693  
rank=1 bitscore=41.6 eval=0.069 perc\_ident=96.88 perc\_cons=96.88 perc\_gaps=0.0  
query\_cvg=100.0 subj\_cvg=94.12 alpha=94.03 beta=4 prob=0.9997719339876521  
GTGTTATGGGAGGAGTCTTTTATTTTACAAGCGTTAAATACTTTAAAAAATGTGAAGAA  
GTTGTTAAACGTTGTTATGTACTTAGTTTAAAAAATAG

>AA QryID: NC\_002952\_(-)\_2627443\_2627601 HitID: NC\_007622\_(-)\_2475807\_2475983  
rank=1 bitscore=63.5 eval=3.0E-8 perc\_ident=80.85 perc\_cons=85.11 perc\_gaps=0.0  
query\_cvg=90.38 subj\_cvg=81.03 alpha=80.26 beta=5 prob=0.9997716258782687  
ATGATGTTATTCAAAAATTTAAATTTTGATAATTTTTTTGTAAATATGAGGTTTTTGAAG  
CGGATTTCTCACAAAGTTTTTAAATTTAAGCCTGAAAACGATAAAGCGGTAGGGAAC  
GTTTTTCTGAAAGTTAGTGATACAATAGTTTAAAGTTGA

>AA QryID: NC\_002952\_(+)\_1364687\_1364839 HitID: NC\_017349\_(+)\_1337921\_1338091  
rank=1 bitscore=72.8 eval=5.0E-11 perc\_ident=93.75 perc\_cons=95.83 perc\_gaps=0.0  
query\_cvg=96.0 subj\_cvg=85.71 alpha=85.18 beta=1 prob=0.9997715447320077  
GTGATTTTGAAAAATATAGTTATTATAATTTAGAATTGCAAATTATAAATCTTGTCATT  
GGATATGGGAATTCAAACATATCACTTACAACAATTTGTGGAATGTAAATAACTATAAA  
GAGGAAAGGAGAAAAAATGATAAGAATGGTTAA

>AA QryID: NC\_002952\_(-)\_1257631\_1257735 HitID: NC\_013450\_(-)\_1228556\_1228660  
rank=1 bitscore=47.4 eval=0.001 perc\_ident=94.12 perc\_cons=100.0 perc\_gaps=0.0  
query\_cvg=100.0 subj\_cvg=100.0 alpha=94.12 beta=3 prob=0.999770844208659  
ATGCCTATACATAGACTATTATTTTCCCATTTTAAATTCTAAAAACAAGTAGAAATT  
TTAGAAACAGTTATCAATTTATTGATTACTGTTTCTTATGCATGA

>AA QryID: NC\_002952\_(-)\_2592141\_2592284 HitID: NC\_017673\_(-)\_2402233\_2402376  
rank=1 bitscore=89.4 eval=4.0E-16 perc\_ident=100.0 perc\_cons=100.0 perc\_gaps=0.0  
query\_cvg=100.0 subj\_cvg=100.0 alpha=66.33 beta=14 prob=0.9997688147337578  
GTGAGGGGATTGTTGTTATTAGATGTTCAATTTATTATGTAATAATTATAGCATTGAT  
GAACAAGGCGCTCAACGTAATATTACAATTAATGGATTGTTTCACAACATGGTAAAGCTA  
GGATGTCTTTTTATTAAGAAATAA

>AA QryID: NC\_002952\_(+)\_2533502\_2533594 HitID: NC\_010079\_(+)\_2494689\_2494781  
rank=1 bitscore=38.9 eval=0.44 perc\_ident=93.33 perc\_cons=93.33 perc\_gaps=0.0  
query\_cvg=100.0 subj\_cvg=100.0 alpha=93.33 beta=5 prob=0.9997672234012195  
GTGACAAAAAAGCGAAGATATGACACAACCTGAATTTGATTTAGCACATAGTATGACAGCT

AAAATAACTTTACATCAAGTGCTATACAAATAA

>AA QryID: NC\_002952\_(+)\_1286741\_1286833 HitID: NC\_007795\_(+)\_1180529\_1180621  
rank=1 bitscore=35.4 eval=4.4 perc\_ident=96.67 perc\_cons=96.67 perc\_gaps=0.0  
query\_cvg=100.0 subj\_cvg=100.0 alpha=96.67 beta=2 prob=0.9997670206392983  
TTGGCAGTAGTCAACGAAATGACTTTGATGATTATGTTGAAGTCATTTCTTTATTTTGT  
CTAATTTTCAATCAAATTGATATCCGCATTAA

>AA QryID: NC\_002952\_(+)\_886622\_886777 HitID: NC\_017342\_(-)\_2501433\_2501588  
rank=1 bitscore=70.9 eval=2.0E-10 perc\_ident=100.0 perc\_cons=100.0 perc\_gaps=0.0  
query\_cvg=100.0 subj\_cvg=100.0 alpha=76.69 beta=9 prob=0.9997653278727765  
TTGATAGTTAAAAAATTACTTAAGGCTATAAAGCAAAATTTTTATATGAGCAGTCGAAT  
ATAACGTTTAAAATGATTCTTTTGGATATAAACGATTAAGTAAAATGATTTTTCAGTTT  
GAAATTAATCATATGAATTTCTTAAGAGAAGGGTGA

>AA QryID: NC\_002952\_(-)\_1860275\_1860379 HitID: NC\_016928\_(-)\_1790543\_1790656  
rank=1 bitscore=36.6 eval=2.2 perc\_ident=90.32 perc\_cons=96.77 perc\_gaps=0.0  
query\_cvg=91.18 subj\_cvg=83.78 alpha=81.89 beta=6 prob=0.99976431784585  
ATGATATTGATTCATTACATGTTACTGATGAACATACCTGCATATGTGTTTCTAGCTTGT  
TTGTTACATATTGCATTTAGACTTGGACAAAAATTTATGTCCTAG

>AA QryID: NC\_002952\_(+)\_513469\_513618 HitID: NC\_017342\_(-)\_49828\_49956  
rank=1 bitscore=72.8 eval=5.0E-11 perc\_ident=100.0 perc\_cons=100.0 perc\_gaps=0.0  
query\_cvg=85.71 subj\_cvg=100.0 alpha=65.76 beta=1 prob=0.9997621601251525  
TTGGATTATCGAAGTAGATCTATGGTTATGGTGTGTTGGTGGCATGTTTACCTGGTTTT  
ACTGAGGGATGGGTAATCTTAAAGAAGCAAATCGTTGGTTGTGATTTGTTACTTCTAATA  
GTAATGATTTCGAATTGAATCATCGAAGTAG

>AA QryID: NC\_002952\_(-)\_528150\_528305 HitID: NC\_007795\_(-)\_461457\_461612  
rank=1 bitscore=73.2 eval=4.0E-11 perc\_ident=100.0 perc\_cons=100.0 perc\_gaps=0.0  
query\_cvg=100.0 subj\_cvg=100.0 alpha=75.22 beta=7 prob=0.9997469482973149  
ATGTTAAGGTATTTATTACTTTCAATGTATTTATTTTACATTAAAAAACGTCGATGTCAT  
CATTTTTTTATCATAGTCAACATCATTTTATCAGTATCAATGCAAATGATAACTTACCA  
TTTAAAATTACAGCTTGCCTTTATAAAATCGTTTAA

>AA QryID: NC\_002952\_(+)\_817285\_817386 HitID: NC\_018608\_(+)\_820083\_820190  
rank=1 bitscore=38.9 eval=0.45 perc\_ident=93.94 perc\_cons=93.94 perc\_gaps=0.0  
query\_cvg=100.0 subj\_cvg=94.29 alpha=91.26 beta=3 prob=0.9997408603743078  
ATGGTAATAACTGAAATTGATGTCTATAGAGTGGGACGAGAAAATATAGTTATAGTTGTC  
TATAACGAGCATATTAAGTTTTATTATACTGATATCTTGA

>AA QryID: NC\_002952\_(-)\_276825\_276950 HitID: NC\_017341\_(-)\_254676\_254801  
rank=1 bitscore=50.8 eval=9.0E-5 perc\_ident=100.0 perc\_cons=100.0 perc\_gaps=0.0  
query\_cvg=100.0 subj\_cvg=100.0 alpha=71.64 beta=14 prob=0.9997386807703852  
ATGGCAACGATGTACGGAGTAAGAAGTGACATCGCTGCTTTATTTTTAATGTTGCATTT  
GAAACATTAAGTTCATCATGCACTGTAGTGAGTCCGCAAATCGCCTCTGCTAGACAATCA  
TCTTAA

>AA QryID: NC\_002952\_(+)\_566927\_567025 HitID: NC\_013450\_(+)\_516763\_516861  
rank=1 bitscore=37.0 eval=1.6 perc\_ident=93.75 perc\_cons=100.0 perc\_gaps=0.0  
query\_cvg=100.0 subj\_cvg=100.0 alpha=93.75 beta=1 prob=0.9997385289509073  
ATGAGTAAGCGAGAGCCGAAGGAGAGAGAAAGAAGCAAGCGATTGTCACAAGTCAAGAAAG  
GTTCTTAGCGACGATGGTAGCCAACCTACGTTCCGCTAG

>AA QryID: NC\_002952\_(-)\_960608\_960724 HitID: NC\_002951\_(-)\_968265\_968399  
rank=1 bitscore=45.1 eval=0.006 perc\_ident=97.37 perc\_cons=97.37 perc\_gaps=0.0  
query\_cvg=100.0 subj\_cvg=86.36 alpha=90.73 beta=1 prob=0.9997377792368485  
TTGTAATTAATCAATAAAATTGATATTTATGTGACGTTTACACCTATTTTCAACAAAC  
ATTCAAACCGGCGTCAAACACTCAAACATTTTTATACAATTTGCATGTTTTTTAA

>AA QryID: NC\_002952\_(+)\_1580370\_1580507 HitID: NC\_007795\_(+)\_1450171\_1450308  
rank=1 bitscore=49.7 eval=4.0E-4 perc\_ident=91.11 perc\_cons=93.33 perc\_gaps=0.0  
query\_cvg=100.0 subj\_cvg=100.0 alpha=91.11 beta=1 prob=0.999737189109615  
GTGACTAAATCAGCTTCTTTTGAATTTCTAGATTTGTAACACTCATTTTCTTACCATT  
GTAAATGCTTTATGAATTTAATGAATTTTGGAAATCTAATAATTTACCTTTATTA  
TTTCTGTAACTTTTTGA

>AA QryID: NC\_002952\_(+)\_1037463\_1037558 HitID: NC\_002951\_(+)\_1036544\_1036639  
rank=1 bitscore=36.2 eval=2.7 perc\_ident=93.55 perc\_cons=96.77 perc\_gaps=0.0  
query\_cvg=100.0 subj\_cvg=100.0 alpha=93.55 beta=1 prob=0.9997343295425399  
GTGATCTATGAAAAATGGATTTGAAGAATATGTATCAAAAGATGCGATATAGTATTAAG  
AAAATGTGCCTTTTATTTTAGCATTTTTTCAATAG

>AA QryID: NC\_002952\_(-)\_2437537\_2437725 HitID: NC\_018608\_(-)\_2319899\_2320087

rank=1 bitscore=95.1 evalue=1.0E-17 perc\_ident=95.16 perc\_conserv=96.77 perc\_gaps=0.0  
 query\_cvg=100.0 subj\_cvg=100.0 alpha=71.85 beta=4 prob=0.9997218502395856  
 ATGTATCTCTGCATTAATAAGTTATATCATAATTATTTTAGTGCATACTTTATGGAAGGC  
 ATATCAGGGAATGCCTATCAATTAAAGAAGAGGTTTAAAAGGATTACAACAGAATGTTAT  
 GATTTTGTAGAAAGATATATTACAACGTTTTATAAAACATAATATTGTTAATGGAAAAT  
 GAAATGTAA  
 >AA QryID: NC\_002952\_(-)\_1819542\_1819655 HitID: NC\_018608\_(-)\_1754524\_1754637  
 rank=1 bitscore=65.1 evalue=5.0E-9 perc\_ident=100.0 perc\_conserv=100.0 perc\_gaps=0.0  
 query\_cvg=100.0 subj\_cvg=100.0 alpha=80.3 beta=2 prob=0.9997175862583094  
 TTGTTGCAAAATAATACTCAGCATTTTAAATATAGTTTTGACGAAAAAAGTTGATTTACAA  
 ATATATAAACGTTGTGATTTCAATGTTTGTATAGGGAATAGACCTATGATATAA  
 >AA QryID: NC\_002952\_(+)\_1065386\_1065574 HitID: NC\_018608\_(+)\_1074136\_1074324  
 rank=1 bitscore=96.3 evalue=5.0E-18 perc\_ident=100.0 perc\_conserv=100.0 perc\_gaps=0.0  
 query\_cvg=100.0 subj\_cvg=100.0 alpha=71.41 beta=2 prob=0.999713495732091  
 ATGAATGCTGATATATTATTTGAGTGCTTAAGTTTCGAAGAACAATTATCAGTTAGCATA  
 TAAAAGCTTTTGATAGAATCATTTTGAAGTGGTGTAAAGGAGAGGAATATAACTCG  
 GTAGTATTTACAGTCTCTTTAGAGTATTATTTAAAACATATAGAATATAAAAAACTGAAC  
 GTACTATGA  
 >AA QryID: NC\_002952\_(-)\_2197012\_2197140 HitID: NC\_018608\_(-)\_2070825\_2070953  
 rank=1 bitscore=70.5 evalue=1.0E-10 perc\_ident=97.62 perc\_conserv=100.0 perc\_gaps=0.0  
 query\_cvg=100.0 subj\_cvg=100.0 alpha=77.47 beta=3 prob=0.999705330389274  
 TTGATAAAAACAATGTCAATAGAGAACATGCGTACTTATCAACAAAGAGTGTATAACTTG  
 TGGATAAAAGGTGTTGATAACGTCATTTATTGTGGATATCAGGTGGGAAAACAGAAAATA  
 AATGATTGA  
 >AA QryID: NC\_002952\_(-)\_2213537\_2213635 HitID: NC\_013450\_(+)\_516763\_516861  
 rank=1 bitscore=36.2 evalue=2.7 perc\_ident=90.62 perc\_conserv=96.88 perc\_gaps=0.0  
 query\_cvg=100.0 subj\_cvg=100.0 alpha=90.62 beta=1 prob=0.9996864492927297  
 ATGAGTAAGCGAGAGCCGAAGGAGAGGAAAGAAGCAAGCGATTGTCACAAGTCAAGAAAG  
 GTTTTAGCGACGATGGTAGCCAACTTACGTTCCGCTAG  
 >AA QryID: NC\_002952\_(+)\_116736\_116843 HitID: NC\_002951\_(+)\_97875\_97982  
 rank=1 bitscore=63.5 evalue=2.0E-8 perc\_ident=100.0 perc\_conserv=100.0 perc\_gaps=0.0  
 query\_cvg=100.0 subj\_cvg=100.0 alpha=78.02 beta=2 prob=0.9996806151875118  
 GTGGATGGTTATTTATTGCGTTGTTCTAAAAATTTGGACATTTATATGGAAAGAACTATA  
 TATAATGTGAAGGTTATGGCAATTCGCTTCAATGAAGGCGACGTGTAA  
 >AA QryID: NC\_002952\_(-)\_2694477\_2694575 HitID: NC\_002951\_(-)\_2601983\_2602081  
 rank=1 bitscore=52.4 evalue=3.0E-5 perc\_ident=83.87 perc\_conserv=90.32 perc\_gaps=0.0  
 query\_cvg=96.88 subj\_cvg=96.88 alpha=81.25 beta=3 prob=0.9996714757839679  
 TTGATAAAAAGAAGCATCTGTCTGGATCATTAGTACCAGATAGATGCTTCTTAATTATC  
 TTTCATAAAGTTGAAAAATTTATGGGAAATGCATGCTAA  
 >AA QryID: NC\_002952\_(+)\_652695\_652796 HitID: NC\_017337\_(+)\_658409\_658510  
 rank=1 bitscore=35.4 evalue=4.3 perc\_ident=81.82 perc\_conserv=84.85 perc\_gaps=0.0  
 query\_cvg=100.0 subj\_cvg=100.0 alpha=84.85 beta=7 prob=0.9996513614446916  
 ATGTGTCAATACTTATGTTTGAAGGTGTTGAATTAGGTGTGATTATTATGATGATTTAT  
 TATTTGAAAGTTGTTGCATTAACGGTGAGATTGCGTAATTGA  
 >AA QryID: NC\_002952\_(+)\_869850\_870008 HitID: NC\_017342\_(-)\_2518207\_2518365  
 rank=1 bitscore=92.4 evalue=5.0E-17 perc\_ident=100.0 perc\_conserv=100.0 perc\_gaps=0.0  
 query\_cvg=100.0 subj\_cvg=100.0 alpha=63.94 beta=5 prob=0.9996324351081594  
 ATGTGTAAAACGCTGCATGATACAAACGAAGGTAAAAATTTGACTCCCTTTAGTAGTGGA  
 CCCGTACGTTTATCGTGCGGGTCGTTTTTATTTATATCTTATCCCGTTATACATCAATT  
 CAAAGCATTAATTTTTTAAACAAATTTAAGAATAGATAG  
 >AA QryID: NC\_002952\_(+)\_366034\_366132 HitID: NC\_017337\_(+)\_371314\_371412  
 rank=1 bitscore=33.1 evalue=22.0 perc\_ident=87.5 perc\_conserv=93.75 perc\_gaps=0.0  
 query\_cvg=100.0 subj\_cvg=100.0 alpha=87.5 beta=2 prob=0.9996064321780768  
 ATGGAAAGCATTTTTTAAATTAATTAAGTAATGAATGTCATTTGTAGGTCTGAAAAT  
 ATGAATATGAAAAAGAAAAATACAAGCGAAAAGATATAA  
 >AA QryID: NC\_002952\_(-)\_2608897\_2609001 HitID: NC\_010079\_(-)\_2568014\_2568118  
 rank=1 bitscore=40.4 evalue=0.14 perc\_ident=100.0 perc\_conserv=100.0 perc\_gaps=0.0  
 query\_cvg=100.0 subj\_cvg=100.0 alpha=78.15 beta=4 prob=0.9996017661477623  
 GTGCCTAATGAGATTTATTTTATTATACCAGTTCTATTGAATAAATTAATTAAGAGGTA  
 TATTTACCATTATTTTTGACACCTTATATGTTAATAGGTGTATAA  
 >AA QryID: NC\_002952\_(-)\_2169367\_2169468 HitID: NC\_017673\_(-)\_1976314\_1976415

rank=1 bitscore=47.8 evalue=0.001 perc\_ident=84.85 perc\_conserv=84.85 perc\_gaps=0.0  
query\_cvg=100.0 subj\_cvg=100.0 alpha=84.85 beta=1 prob=0.9995828167809223  
TTGATATTGTTAGGTGCATATGAGGCATGTAGAGGTATAGTGGGAAGTTAAAGAAATGAAA  
ACGATGAGATATCAGTTTAAAGTTAGTCAATTCAAATTTTAA  
>AA QryID: NC\_002952\_(-)\_2079397\_2079543 HitID: NC\_017673\_(-)\_1878373\_1878519  
rank=1 bitscore=43.1 evalue=0.043 perc\_ident=72.92 perc\_conserv=72.92 perc\_gaps=0.0  
query\_cvg=100.0 subj\_cvg=100.0 alpha=72.92 beta=16 prob=0.999576110951218  
TTGGTTGCTGACTTAGATGCAATCGAGGGTTTATTTATATCTATAGAAGTCATATTACTT  
TTAACTTTATTTCATTGTACATGTTAATGGTAAAAATATTAATTTTATTAATGCGTTAGCT  
TTAATTATATTAAGGCAAACGTGTATAA  
>AA QryID: NC\_002952\_(+)\_1287833\_1287946 HitID: NC\_002951\_(+)\_1285396\_1285509  
rank=1 bitscore=42.4 evalue=0.04 perc\_ident=97.22 perc\_conserv=100.0 perc\_gaps=0.0  
query\_cvg=97.3 subj\_cvg=97.3 alpha=71.46 beta=6 prob=0.9995684432086581  
ATGGGTGATAAGATATTAATGCTTATCACCTTTTTTAAAAAGAAAATCAAGGCAAATTAC  
AAATATTCAATTAGAGTATTGGCAATCTTGCTATAATAATGCTAAAATTATAA  
>AA QryID: NC\_002952\_(+)\_1994869\_1995060 HitID: NC\_017763\_(+)\_1904239\_1904424  
rank=1 bitscore=85.1 evalue=9.0E-15 perc\_ident=85.25 perc\_conserv=88.52 perc\_gaps=0.0  
query\_cvg=96.83 subj\_cvg=100.0 alpha=68.28 beta=2 prob=0.9995633748853949  
TTGACACTTGCTCTTTTAAAGAATACTAACATTTTCATTGTATTTCCGTTAAATTAACGGAG  
AAGGCGGATTACCTCGATATATTTATCTCTAGAGTGTTAAAAAATTGTACATTCTTAAAC  
AATCAAAAGTATACGTTATTAAATTATCATTTCCACTGGAGAATCATGGCGACTAAAAGA  
TTATTAAGTAA  
>AA QryID: NC\_002952\_(-)\_1908131\_1908271 HitID: NC\_016928\_(-)\_1840337\_1840477  
rank=1 bitscore=76.6 evalue=3.0E-12 perc\_ident=97.83 perc\_conserv=100.0 perc\_gaps=0.0  
query\_cvg=100.0 subj\_cvg=100.0 alpha=70.16 beta=2 prob=0.9995620295454619  
TTGGAAATTTTAATTATTAAATTTAAATTACAGTCCGATGGTTATGATGCATTTACATAT  
AATATGATTGCATTAATTTTATAAGTAGTTGGAAGTGATTAGTGTTGGGGCGTTTCATT  
TTTGTTTCGATTTATGAATAG  
>AA QryID: NC\_002952\_(-)\_1580533\_1580649 HitID: NC\_018608\_(-)\_1564044\_1564160  
rank=1 bitscore=62.4 evalue=4.0E-8 perc\_ident=89.47 perc\_conserv=89.47 perc\_gaps=0.0  
query\_cvg=100.0 subj\_cvg=100.0 alpha=65.89 beta=11 prob=0.9995547200592216  
GTGCAACGCTTAATGCATATACAAATTGAATGTGCTGATAATGATTTACTCAACTTAAAA  
GGTGATTTTTATTCAACGATGAATGAAAGTTGCCTTTTTACTTTTGGTAAAAGTTAA  
>AA QryID: NC\_002952\_(+)\_1068569\_1068679 HitID: NC\_009632\_(+)\_1150678\_1150788  
rank=1 bitscore=58.2 evalue=7.0E-7 perc\_ident=100.0 perc\_conserv=100.0 perc\_gaps=0.0  
query\_cvg=100.0 subj\_cvg=100.0 alpha=71.57 beta=4 prob=0.9995509982322296  
GTGTCATTGTGCACACAACAAAAATTGAATCATGAATTACAAGCAAAAGTAGCGGTGATT  
GTAAAAATTGATGGTAAACAATCACCGCTATTTTTGCTTGTGTATGTATAA  
>AA QryID: NC\_002952\_(+)\_703024\_703116 HitID: NC\_009487\_(+)\_736497\_736589  
rank=1 bitscore=48.5 evalue=5.0E-4 perc\_ident=100.0 perc\_conserv=100.0 perc\_gaps=0.0  
query\_cvg=100.0 subj\_cvg=100.0 alpha=70.11 beta=7 prob=0.9995368564782208  
TTGTTTTGTTATTATAAACACACAAAGGAGATACTTCTCTATTGAAGAAGTTAAAAAC  
ATTATAGCAGACAATGAAATGAAAGTAAATTAA  
>AA QryID: NC\_002952\_(-)\_2640574\_2640705 HitID: NC\_002951\_(-)\_2537025\_2537156  
rank=1 bitscore=77.0 evalue=1.0E-12 perc\_ident=95.35 perc\_conserv=100.0 perc\_gaps=0.0  
query\_cvg=100.0 subj\_cvg=100.0 alpha=70.1 beta=2 prob=0.9995326683784074  
GTGAATGTAGTTAACGGACAACGATTCGCTTGTAGAGCCACAAGAAGCAACTTTAAAT  
AAGGTTTACGGTTGCATGTTGATGCAACAACCGATTACTAAGTCATGCTTTCCACTTTGC  
GGATTAGCATGA  
>AA QryID: NC\_002952\_(+)\_729232\_729351 HitID: NC\_010079\_(+)\_746982\_747101  
rank=1 bitscore=50.8 evalue=1.0E-4 perc\_ident=92.31 perc\_conserv=94.87 perc\_gaps=0.0  
query\_cvg=100.0 subj\_cvg=100.0 alpha=65.82 beta=11 prob=0.9994752097906959  
TTGGTGCTTCAGCTGATTTTAAATGAAAATAGCATTAATGATTTTAAAAAGATAAGAGT  
GTGTTATTTATATTTTGA AAAATCACTTTTATGAAGAAATGTGTGTACTATCTAATTAA  
>AA QryID: NC\_002952\_(+)\_123607\_123729 HitID: NC\_018608\_(+)\_103660\_103782  
rank=1 bitscore=54.7 evalue=8.0E-6 perc\_ident=97.5 perc\_conserv=100.0 perc\_gaps=0.0  
query\_cvg=100.0 subj\_cvg=100.0 alpha=74.5 beta=1 prob=0.9994497114974599  
ATGTCTAAAAATGTCGTATATGTAATCAGAGTAGAAAGTGTTGAGGCGTTTCAGAAGTTG  
TTTAGAAAAAGTAAGTAAATAAAAAATGCACTGAGCAACAAAAGATGTTGCTCGTGCATT  
TAG  
>AA QryID: NC\_002952\_(+)\_1972681\_1972785 HitID: NC\_002976\_(+)\_2266163\_2266258

rank=1 bitscore=45.4 evalue=0.005 perc\_ident=80.65 perc\_conserv=93.55 perc\_gaps=0.0  
 query\_cvg=91.18 subj\_cvg=100.0 alpha=46.68 beta=21 prob=0.9994391367864808  
 GTGTATAAGGTGATGCTTATTTTCGTTACATCATAGCACCAGTCATCAGTGGCTGTGCC  
 ATTGCGTTTTTTCTTATTGGCTAAGTAGACGCAATACAAAATAG  
 >AA QryID: NC\_002952\_(+)\_341759\_341872 HitID: NC\_010079\_(+)\_352588\_352701  
 rank=1 bitscore=57.0 evalue=1.0E-6 perc\_ident=94.59 perc\_conserv=97.3 perc\_gaps=0.0  
 query\_cvg=100.0 subj\_cvg=100.0 alpha=70.58 beta=2 prob=0.999291905129162  
 GTGCAAAACCAACCTCGTTTTACATTTGATTCAAAGAAGAAGGTAAAAAATAAGATTATT  
 TGCAACTTAAAAAGTCAATTAGCTTATCGGTATCCATACATCATGGATAAATAA  
 >AA QryID: NC\_002952\_(+)\_556815\_556907 HitID: NC\_013450\_(+)\_508439\_508531  
 rank=1 bitscore=41.2 evalue=0.087 perc\_ident=96.67 perc\_conserv=96.67 perc\_gaps=0.0  
 query\_cvg=100.0 subj\_cvg=100.0 alpha=65.96 beta=7 prob=0.9991727215654009  
 ATGGTTAATGGTAAAGTATTAGAAACATCGAAAGAGATGTATGTTGAGCAAAAATGTCTG  
 ATATTTTATAAACTTTAAAGGAAAATGTTTGA  
 >AA QryID: NC\_002952\_(-)\_1166989\_1167120 HitID: NC\_018608\_(-)\_1175650\_1175781  
 rank=1 bitscore=53.9 evalue=1.0E-5 perc\_ident=90.7 perc\_conserv=95.35 perc\_gaps=0.0  
 query\_cvg=100.0 subj\_cvg=100.0 alpha=66.91 beta=5 prob=0.9991546500144801  
 TTGTTTTATCAAACCACTATTACATATCTATCAGCATGTTTGATTATCATTTAACGTTT  
 ATAGATTTATTAATCCACCATTCTCAAGTCGTAAACAATATGATGACTTATCATTTCAAC  
 TTTATATATTAA  
 >AA QryID: NC\_002952\_(+)\_22228\_22320 HitID: NC\_002951\_(+)\_22263\_22355  
 rank=1 bitscore=34.3 evalue=9.3 perc\_ident=80.0 perc\_conserv=90.0 perc\_gaps=0.0  
 query\_cvg=100.0 subj\_cvg=100.0 alpha=80.0 beta=1 prob=0.9990712436284594  
 ATGTTAAGTTTGTGTATTGGAAGTGATGAATTAGTGCTGTCAAAGACTCTGTAAAGGGT  
 TTTGAGGACGTTGAAGACGATTTGTTAAAATGA  
 >AA QryID: NC\_002952\_(-)\_2068115\_2068303 HitID: NC\_017673\_(-)\_815608\_815802  
 rank=1 bitscore=67.4 evalue=2.0E-9 perc\_ident=61.67 perc\_conserv=68.33 perc\_gaps=3.33  
 query\_cvg=96.77 subj\_cvg=90.62 alpha=58.74 beta=51 prob=0.9990254316516372  
 TTGGGGTGTGGGCCCAACACAGAGAATTTGCAAAAAAGAAATTCTACAGGCAATGCAGG  
 TTGGGGTGTAGGCCCAACACAGAGAATTTGGAACACCAATTTCTATAGGCAATGCAAGT  
 TGGCGGGGCCCAACACAGAGAATTTCAAAAAAGAAATTCTACAGGCAATGCAAGTTGGG  
 GACGATTAA  
 >AA QryID: NC\_002952\_(-)\_452157\_452417 HitID: NC\_017673\_(-)\_387416\_387676  
 rank=1 bitscore=99.4 evalue=7.0E-19 perc\_ident=76.74 perc\_conserv=77.91 perc\_gaps=0.0  
 query\_cvg=100.0 subj\_cvg=100.0 alpha=57.99 beta=3 prob=0.9988785116304371  
 ATGCTAACTGTTAATAATCAATTCTTATCCGTCAAGACTCTTTTTATACAATTCACACT  
 TTAACCATTTTAAATTTTAAAACTGTAAACTTTTTCAGACACAAAAATGACATCATATCG  
 TCGCAGTACCATGTCAAAATTTTCAAAGATCATGGTGACACGCATCAACTAAAACGCGTC  
 ATTACGGTATTTTAAACATTAATAACATATGCGTATTTACTATACACGGCGACAATAAAT  
 ACAGATTGCAATTTTTTATAA  
 >AA QryID: NC\_002952\_(+)\_2540076\_2540249 HitID: NC\_017342\_(-)\_886351\_886524  
 rank=1 bitscore=43.5 evalue=0.03 perc\_ident=71.93 perc\_conserv=71.93 perc\_gaps=0.0  
 query\_cvg=100.0 subj\_cvg=100.0 alpha=71.93 beta=5 prob=0.9987545713554574  
 TTGCTTACTATCTTTCTAATTTTACTTTTATTGTGACGATGGATAAAAACAAGCGTT  
 TTCCTAGGAGTTTTCTTTAATTTCTTTTATTTTCACTATTACCTTTTCAAAAATATTCA  
 ACTATAATAGGTATACTATCCATGATTTTAAAAATTTCCATGTTTTACATTTAA  
 >AA QryID: NC\_002952\_(-)\_457960\_458121 HitID: NC\_018608\_(-)\_484315\_484476  
 rank=1 bitscore=50.8 evalue=2.0E-4 perc\_ident=71.7 perc\_conserv=73.58 perc\_gaps=0.0  
 query\_cvg=100.0 subj\_cvg=100.0 alpha=71.7 beta=1 prob=0.998587671213647  
 ATGCTATTTTTTTCACCATTCACACTTTCTTTCAATTTAATTATGTTTTCCACATTGTTT  
 CATGTCACTAGTGCGACACCGTGCGACTATAGGTATCAACTATTTTCACAGTTTTTATTG  
 TCGTTATTATCTTTTCATCGACCCACTTCATTTCCGATCGTAA  
 >AA QryID: NC\_002952\_(-)\_2626088\_2626216 HitID: NC\_007622\_(-)\_2473470\_2473598  
 rank=1 bitscore=55.5 evalue=4.0E-6 perc\_ident=88.1 perc\_conserv=90.48 perc\_gaps=0.0  
 query\_cvg=100.0 subj\_cvg=100.0 alpha=63.29 beta=1 prob=0.998580573299692  
 GTGTACTTCAATTTTACATAAATATTAATAAAAAATTTTCCAGAATGAAATGGCACTAAAT  
 TTTTCAAAAATGGGAATACTATATTTGATATGTTTTATTAGAGCGATTTTAAATGGGTAAT  
 AAGCATTGA  
 >AA QryID: NC\_002952\_(-)\_2530980\_2531156 HitID: NC\_016941\_(-)\_2377543\_2377719  
 rank=1 bitscore=59.7 evalue=4.0E-7 perc\_ident=84.48 perc\_conserv=89.66 perc\_gaps=0.0  
 query\_cvg=100.0 subj\_cvg=100.0 alpha=62.41 beta=1 prob=0.9985237956695772  
 ATGAAAATCGATACATTAAGACAAGCTATAATATATTTTGTGCACTTGTGTTATCA

GCTTTAATGATCTATTTATTTTAAACAAACATTGAGAGAGTTATTTTGTATAGTTGTGTA  
TTCACAGTCGTTTATTGGGCAATATATGCCTTTGATGTATATAGAAAGAGAAATTAA  
>AA QryID: NC\_002952\_(+)\_2100886\_2100993 HitID: NC\_007795\_(+)\_2009610\_2009717  
rank=1 bitscore=33.1 evalue=21.0 perc\_ident=74.29 perc\_conserv=74.29 perc\_gaps=0.0  
query\_cvg=100.0 subj\_cvg=100.0 alpha=74.29 beta=1 prob=0.9984824076254122  
TTGGTTGACTTTCTTTTGTGTATTGTTTTACACGATGCTACGGTATACGTTTCGTTA  
CCACTCGTTCAAGCAATTGCTAATGTAACATTTTATTTTCGTTCTAA  
>AA QryID: NC\_002952\_(-)\_2192176\_2192268 HitID: NC\_009632\_(-)\_2193769\_2193882  
rank=1 bitscore=40.4 evalue=0.15 perc\_ident=76.67 perc\_conserv=90.0 perc\_gaps=0.0  
query\_cvg=100.0 subj\_cvg=81.08 alpha=69.41 beta=1 prob=0.9984250005049724  
GTGGCACATTTTGTTCCAAAGATGTAATAAACTTTACGCATTTTGTCTTTTATAAAT  
TATCAGATTATTATGGAAACAAGGGAGTGGTAA  
>AA QryID: NC\_002952\_(-)\_2373448\_2373564 HitID: NC\_016912\_(-)\_2153893\_2154006  
rank=1 bitscore=52.8 evalue=3.0E-5 perc\_ident=86.49 perc\_conserv=91.89 perc\_gaps=0.0  
query\_cvg=97.37 subj\_cvg=100.0 alpha=57.37 beta=1 prob=0.9984085677741077  
TTGGTAAATTTATTCAAAAGCTTAAAGGGGAAAAATCCTACCTGGAGATATCCAAAAATTA  
AATGGACTATTTCCAAAAATAAAGGGCAATCATATGGTGGTTCTTATTGGAAGTTAA  
>AA QryID: NC\_002952\_(+)\_1743946\_1744146 HitID: NC\_018608\_(+)\_1679928\_1680170  
rank=1 bitscore=84.7 evalue=2.0E-14 perc\_ident=72.73 perc\_conserv=74.24 perc\_gaps=0.0  
query\_cvg=100.0 subj\_cvg=82.5 alpha=45.86 beta=1 prob=0.998139638432376  
ATGTATCACTCATAATACTTTTCAATTTGAAATACTCTGTTTCGCAATTATTAGTTGAG  
TTATATCAACCAATACAGTGTAACCTTAAAAATTCCAAACCGTTTAAACAGTATATCAGAA  
AAAATGATAATTATTTCAATTATTTTATTAAATTTTATAATGATTCATATAATATTCGA  
ATTAAACATCACAATACTGA  
>AA QryID: NC\_002952\_(+)\_2584150\_2584257 HitID: NC\_016928\_(+)\_2443867\_2443992  
rank=1 bitscore=39.3 evalue=0.36 perc\_ident=70.73 perc\_conserv=75.61 perc\_gaps=14.63  
query\_cvg=100.0 subj\_cvg=100.0 alpha=62.85 beta=6 prob=0.9981207532620509  
TTGAATCAGCCTCATAACATTAAATTATTTTATCGTACAACCTGATTTTATAAGAGCAAA  
GTATCGCATCATAGTAGATACACAAATAATAAAAATGAAACAATTTAA  
>AA QryID: NC\_002952\_(+)\_2694285\_2694476 HitID: NC\_010079\_(+)\_2665243\_2665434  
rank=1 bitscore=60.1 evalue=3.0E-7 perc\_ident=65.08 perc\_conserv=65.08 perc\_gaps=0.0  
query\_cvg=100.0 subj\_cvg=100.0 alpha=65.08 beta=1 prob=0.9979606668424708  
ATGAAAACGATAATCATGCTGAGCGATAAAGATTTAAATAATAGATTGACCCACGTTCCC  
TCAGTCGTATATCCATATGTAATCGTTGTGTTAATGATGAATGCTATAAAGATGATTGAT  
AGTCTTAGCATATCATCACTCCTTTTAAAGTTATTTTAGATATACGGGGGCGCTTTTGCAA  
TCACTATTTTGA  
>AA QryID: NC\_002952\_(-)\_2792155\_2792268 HitID: NC\_017333\_(-)\_2764115\_2764228  
rank=1 bitscore=32.3 evalue=43.0 perc\_ident=67.57 perc\_conserv=67.57 perc\_gaps=0.0  
query\_cvg=100.0 subj\_cvg=100.0 alpha=67.57 beta=8 prob=0.9961019911256409  
ATGTATAGAAATATCAATATGAAAAATAATATGATTAAAAATAATGAATGGCATACTTAT  
AAAGTGTCTAAATATTGGTGGTCAATATTACTTGCAAATACGAATGTAAAGTAA  
>AA QryID: NC\_002952\_(-)\_1938855\_1938974 HitID: NC\_017333\_(-)\_1928869\_1928985  
rank=1 bitscore=33.5 evalue=17.0 perc\_ident=68.42 perc\_conserv=68.42 perc\_gaps=0.0  
query\_cvg=97.44 subj\_cvg=100.0 alpha=69.23 beta=7 prob=0.9958393391273374  
TTGATGTTGATTTCATTTGTATATAATAATATGGACAACAATAACTATAAATAGAAAT  
CTACATAGTGAATTTGCTATAATTATGTTATTGAAGATTAATGAAAAAGGGGCAGTATAA  
>AA QryID: NC\_002952\_(+)\_2866129\_2866236 HitID: NC\_010079\_(+)\_2840870\_2840977  
rank=1 bitscore=32.0 evalue=54.0 perc\_ident=65.71 perc\_conserv=65.71 perc\_gaps=0.0  
query\_cvg=100.0 subj\_cvg=100.0 alpha=65.71 beta=1 prob=0.991834636585919  
GTGCCTATAAAAATGCTTAACCAAGATTTTATATTGAAGTTGACTTCTTGCACATATT  
GTCCTTGCCTTATTATGTAAGTTATTTCTTTCTATCTTTTATTAA  
>AA QryID: NC\_002952\_(+)\_2650511\_2650633 HitID: NC\_007795\_(+)\_2556559\_2556681  
rank=1 bitscore=31.6 evalue=73.0 perc\_ident=65.0 perc\_conserv=65.0 perc\_gaps=0.0  
query\_cvg=100.0 subj\_cvg=100.0 alpha=65.0 beta=3 prob=0.9868844347101147  
TTGAGCTACATTATCAAATTCACCTTTAAATTTTTTGAATGACTACCTATATTTACAG  
CTCACTTTAGATATCGAACTTGTTCCTCAGAGTTACTTGTTATATTATCAGGTTTTATT  
TGA  
>AA QryID: NC\_002952\_(-)\_2694245\_2694415 HitID: NC\_017673\_(-)\_2509135\_2509305  
rank=1 bitscore=39.3 evalue=0.52 perc\_ident=62.5 perc\_conserv=62.5 perc\_gaps=0.0  
query\_cvg=100.0 subj\_cvg=100.0 alpha=62.5 beta=16 prob=0.9726639000322597  
ATGCTAAGACTATCAATCATCTTTATAGCATTCATCATTAACACAACGATTACATATGGA  
TATACGACTGAGGGAACGTGGGTCAATCTATTATTTAAATCTTTATCGCTCAGCATGATT



ATCGTTTTTCATGTTCTACTATATTCGTTTTGTTATTGAGAAAAAGCGTTAA

>AA QryID: NC\_002952\_(+)\_2182140\_2182265 HitID: NC\_007622\_(+)\_2043598\_2043795  
rank=1 bitscore=51.6 evalue=7.0E-5 perc\_ident=57.89 perc\_conserv=57.89 perc\_gaps=31.58  
query\_cvg=95.12 subj\_cvg=87.69 alpha=65.63 beta=45 prob=0.9545479076810539  
TTGTCTGTAGAAATTGGTGTCCAATTTCTCTATGTTGGGGCCCCATCAACTACTGTCAA  
TATAACATTGTAGAGCCTAGGACTTTGATTTTATGTCCTGGGCTTGTTTTTGC GTTTCA  
ACATAA

>AA QryID: NC\_002952\_(+)\_2078802\_2078942 HitID: NC\_002745\_(-)\_1142748\_1142879  
rank=1 bitscore=37.4 evalue=2.3 perc\_ident=65.79 perc\_conserv=78.95 perc\_gaps=5.26  
query\_cvg=80.43 subj\_cvg=86.05 alpha=56.24 beta=9 prob=0.8384311262378246  
TTGGTTTCGTCTAATAGGAGTGGGACAGAAATAATATTTAACAAAATTTATTTTCGTTCTA  
CCCCAACTTACATTGTCTGTAGAATTTCTTTTCAAAATTCTCTATGTTTGGGGCCCCACC  
CCAAC TTGCACATTATTGTAA

>AA QryID: NC\_002952\_(+)\_1664182\_1664361 HitID: NC\_017343\_(+)\_1507850\_1508029  
rank=1 bitscore=37.4 evalue=2.2 perc\_ident=59.32 perc\_conserv=61.02 perc\_gaps=0.0  
query\_cvg=100.0 subj\_cvg=100.0 alpha=45.35 beta=13 prob=0.8213248733462539  
TTGCTAGTTATATCGTCTCAAGTTAAAAATTTTATATCTTATGTCGTAATTATTAATACA  
AAGGTTATTCATTTGGAGGCACACAAAATGCAAAATAAAGTTTTAAGAATTATCATTATC  
GTTATGCTTGTATCAGTTGTATTAGCATTGTTATTAACGAGTATCATTCCAATTTTATAA

>AA QryID: NC\_002952\_(-)\_1136839\_1136967 HitID: NC\_002953\_(-)\_859569\_859811  
rank=1 bitscore=52.4 evalue=4.0E-5 perc\_ident=47.3 perc\_conserv=47.3 perc\_gaps=45.95  
query\_cvg=95.24 subj\_cvg=92.5 alpha=63.54 beta=21 prob=0.7749474344178056  
TTGACTGAACGAAAATGCGCTTGTAACAAGCTTTTTTCAATTCTAGTCAACCTTGCCGGG  
GTGGGACGACGAAATAAATTTTGC GAAAATATCATTTCTGTCCCACTCCCTTTTTATATC  
AATATTTAA
