# Supplementary material for: OCCAM: prediction of small ORFs in bacterial genomes by means of a target-decoy database approach and machine learning techniques
Source: Oxford University Press journal article supplement (doi:10.1093/database/baaa067), 2020-01-01
Supplement: baaa067_supp.zip [file baaa067_supp.zip]

### Identification of the genomes of the eight bacteria used in this work

| Organism                                                | Genome identification |
|---------------------------------------------------------|-----------------------|
| Escherichia coli K12 substr MG                          | NC_000913             |
| Mycobacterium tuberculosis H37Rv uid57777               | NC_000962             |
| Bacillus subtilis 168                                   | NC_000964             |
| Pseudomonas aeruginosa PAO1                             | NC_002516             |
| Caulobacter crescentus CB15 uid57891                    | NC_002696             |
| Staphylococcus aureus MRSA                              | NC_002952             |
| Mycoplasma hyopneumoniae 7448 uid58039                  | NC_007332             |
| Actinobacillus pleuropneumoniae serovar 5b L20 uid58789 | NC_009053             |
