# Supplementary figures and images for: OCCAM: prediction of small ORFs in bacterial genomes by means of a target-decoy database approach and machine learning techniques
Source: Oxford University Press journal article supplement (doi:10.1093/database/baaa067), 2020-01-01

### Start codon distribution in the datasets of the organisms used in this work

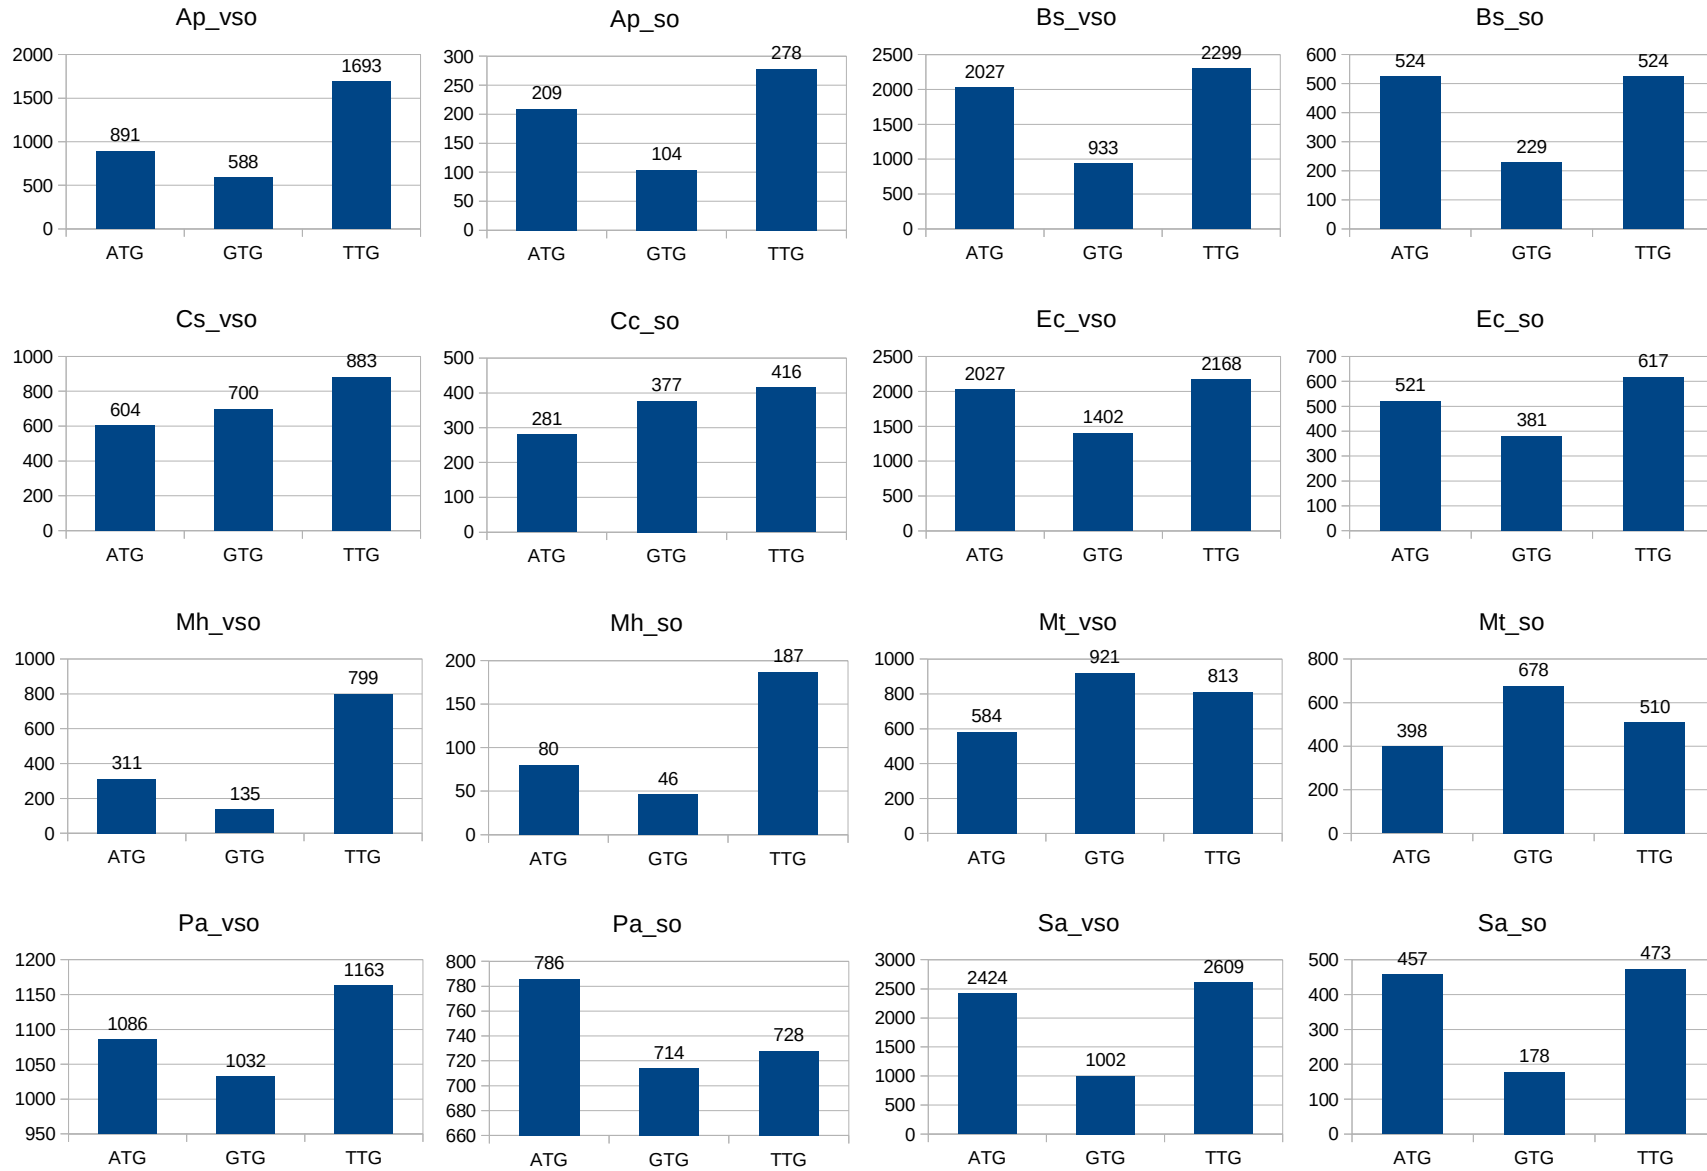

Supplement: baaa067_supp.zip [file baaa067_supp.zip]
